# Supplementary material for: RhodiumIII-catalyzed remote difunctionalization of arenes assisted by a relay directing group
Source: Royal Society of Chemistry journal article supplement (doi:10.1039/d2sc02205b), 2022-01-01
Supplement: d2sc02205b1.pdf [file d2sc02205b1.pdf]

## *Supporting Information*

### **Rhodium<sup>III</sup>-Catalyzed Remote Difunctionalization of Arenes Assisted by a Relay Directing Group**

Lincong Sun,<sup>1</sup> Yuyao Zhao,<sup>1</sup> Bingxian Liu,<sup>1</sup> Junbiao Chang,\*<sup>1</sup> Xingwei Li\*<sup>1,2</sup>

<sup>1</sup>NMPA Key Laboratory for Research and Evaluation of Innovative Drug, Collaborative Innovation Center of Henan Province for Green Manufacturing of Fine Chemicals, School of Chemistry and Chemical Engineering, Henan Normal University, Xinxiang, Henan 453007, China.

<sup>2</sup>Institute of Molecular Science and Engineering, Institute of Frontier and Interdisciplinary Sciences, Shandong University, Qingdao 250100, China

\*E-mail: *changjunbiao@zzu.edu.cn; lixw@snnu.edu.cn*

## Table of Contents

|                                                             |    |
|-------------------------------------------------------------|----|
| 1. General Information.....                                 | 3  |
| 2. General Procedure for the Preparation of Substrates..... | 4  |
| 3. Experimental Section.....                                | 18 |
| 4. X-Ray Crystal Structure of 32 and intermediate A.....    | 37 |
| 5. References.....                                          | 40 |
| 6. Characterization Data .....                              | 41 |
| 7. NMR spectrum and HPLC Chromatogram .....                 | 59 |

## 1. General Information

All chemicals were obtained from commercial sources and were used as received unless otherwise noted. The  $^1\text{H}$  NMR spectra were recorded on a 400 MHz or 600 MHz NMR spectrometer. The  $^{13}\text{C}$  NMR spectra were recorded at 100 MHz or 150 MHz. The  $^{19}\text{F}$  NMR spectra were recorded at 376 MHz or 565 MHz. Chemical shifts were expressed in parts per million ( $\delta$ ) downfield from the internal standard tetramethylsilane (TMS), and were reported as s (singlet), d (doublet), t (triplet), dd (doublets of doublet), dt (doublets of triplet), and m (multiplet). The residual solvent signals were used as references and the chemical shifts were converted to the TMS scale ( $\text{CDCl}_3$ :  $\delta$  H = 7.26 ppm,  $\delta$  C = 77.16 ppm). The coupling constants  $J$  were given in Hz. High resolution mass spectra were obtained on an Agilent Q-TOF 6540 spectrometer. The conversion of starting materials was monitored by thin layer chromatography (TLC) using silica gel plates (silica gel 60 F254 0.25 mm), and components were visualized by observation under UV light (254 and 365 nm). X-ray measurements were performed on a Bruker D& Advance X-ray powder diffractometer with graphite monochromatized Cu  $K\alpha$  radiation at 293 K. Column chromatography was performed on silica gel 200-300 mesh.

Alkynes<sup>1</sup>, dioxazolones<sup>2</sup>,  $t\text{-AmOD}$ <sup>3</sup>,  $[\text{Cp}^*\text{RhCl}_2]_2$ <sup>4</sup> and chiral rhodium catalyst<sup>5</sup> were prepared according to published procedures. Other chemicals were purchased from commercial suppliers and were dried and purified when necessary.

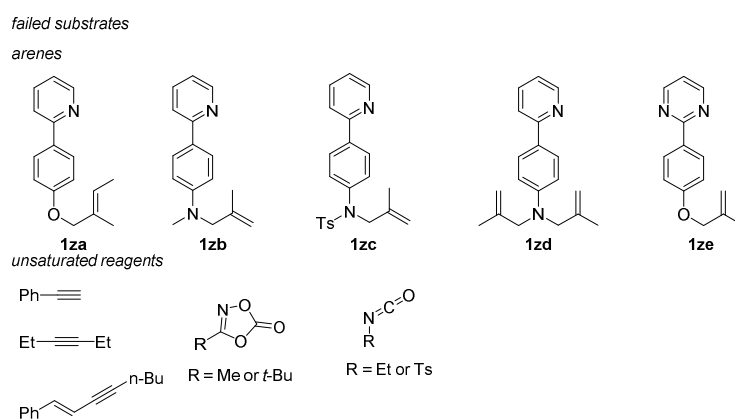

## 2. General Procedure for the Preparation of Substrates

### General Procedure A

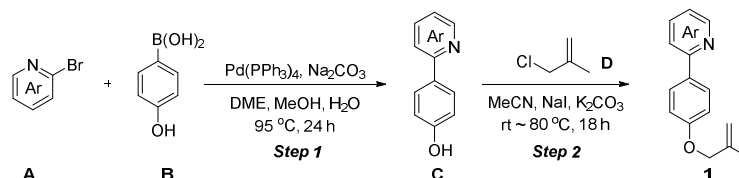

**Step 1:** Compound **A** (3.5 mmol, 1.0 equiv) was dissolved in DME (15 mL) under an inert atmosphere and a solution of compound **B** (483.2 mg, 3.5 mmol, 1.0 equiv) in MeOH (4 mL) was added followed by a solution of  $\text{Na}_2\text{CO}_3$  (742.0 mg, 7.0 mmol, 2.0 equiv) in water (4 mL). The mixture was degassed and subsequently  $\text{Pd}(\text{PPh}_3)_4$  (121.3 mg, 0.105 mmol, 0.03 equiv) was added. The reaction mixture was heated up to 95 °C for 24 hours. Afterwards the reaction mixture was brought to room temperature, diluted with water and extracted with EtOAc. The combined organic layers were washed with water and brine, dried over  $\text{Na}_2\text{SO}_4$ , filtered and the solvent was removed under reduced pressure. The crude product was purified by flash column chromatography (silica, EtOAc/petroleum ether = 1:2) to obtain desired compound **C** as a white solid (80-90% yields).

**Step 2:** To a solution of compound **C** (2.0 mmol, 1.0 equiv), and potassium carbonate (552.9 mg, 4.0 mmol, 2.0 equiv), NaI (28 mg, 0.2 mmol, 0.1 equiv) in MeCN (10 mL), compound **D** (216.0 mg, 2.4 mmol, 1.2 equiv) was added and the mixture was stirred under 80 °C for 18 hours. Afterwards the reaction mixture was brought to room temperature, diluted with water and extracted with EtOAc. The combined organic layers were washed with water and brine, dried over  $\text{Na}_2\text{SO}_4$ , filtered and the solvent was removed under reduced pressure. The crude product was purified by flash column chromatography (silica, EtOAc/petroleum ether = 1:10) to obtain desired compound **1** as a white solid (90-95% yields).

### General Procedure B: Mitsunobu reaction

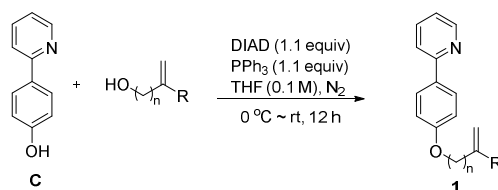

**Step :** Diisopropyl azodicarboxylate (444.9 mg, 2.20 mmol, 1.1 equiv) was added dropwise to a solution of **C** (342.1 mg, 2.0 mmol, 1.0 equiv), triphenylphosphine (577.1 mg, 2.20 mmol, 1.10 equiv) and the respective allyl alcohol (2.20 mmol, 1.10 equiv) in anhydrous THF (20 mL) at 0 °C under an inert atmosphere. The cold bath was removed and the mixture was stirred at 23 °C for 12 hours. Then, the mixture was evaporated together with silica and the desired compound **1** was isolated by column chromatography (silica, EtOAc/petroleum ether = 1:3) on silica gel.

### General Procedure C

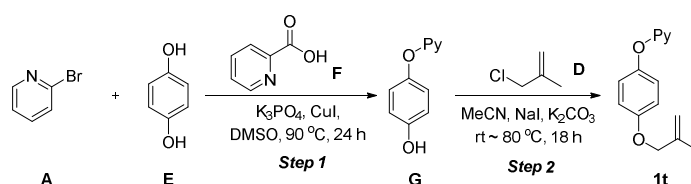

**Step 1:** The compound **A** (1.570 g, 10 mmol, 1.0 equiv), **E** (1.210 g, 11 mmol, 1.1 equiv), CuI (190 mg, 10 mol%), K<sub>3</sub>PO<sub>4</sub> (4.246 g, 20 mmol, 2.0 equiv), **F** (246.1 mg, 20 mol%), and DMSO (20 mL) were mixed and heated to 90 °C for 24 hours under an inert atmosphere. Afterwards the reaction mixture was brought to room temperature, diluted with water and extracted with EtOAc. The combined organic layers were washed with water and brine, dried over Na<sub>2</sub>SO<sub>4</sub>, filtered and the solvent was removed under reduced pressure. The crude product was purified by flash column chromatography (silica, EtOAc/petroleum ether = 1:3) to obtain desired compound **G**.

**Step 2:** To a solution of compound **G** (374.1 mg, 2.0 mmol, 1.0 equiv), and potassium carbonate (552.8 mg, 4.0 mmol, 2.0 equiv), NaI (30.0 mg, 0.2 mmol, 0.1 equiv) in MeCN (10 mL), compound **D** (216.0 mg, 2.4 mmol, 1.2 equiv) was added and the mixture was stirred under 80 °C for 18 hours. Afterwards the reaction mixture was brought to room temperature, diluted with water and extracted with EtOAc. The combined organic layers were washed with water and brine, dried over Na<sub>2</sub>SO<sub>4</sub>, filtered and the solvent was removed under reduced pressure. The crude product was purified by flash column chromatography (silica, EtOAc/petroleum ether = 1:10) to obtain desired compound **1t** as a yellow oil.

### General Procedure D

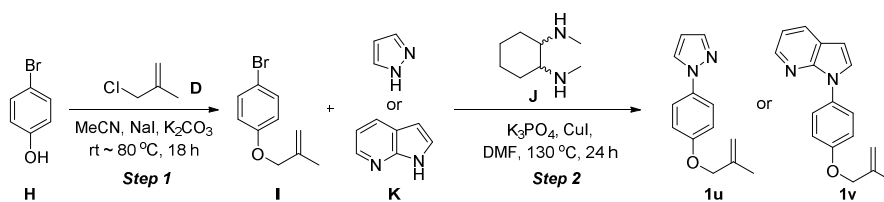

**Step 1:** To a solution of compound **H** (1.720 g, 10.0 mmol, 1.0 equiv), and potassium carbonate (2.764 g, 20.0 mmol, 2.0 equiv), NaI (140 mg, 1.0 mmol, 0.1 equiv) in MeCN (10.0 mL), compound **D** (1.080 g, 12.0 mmol, 1.2 equiv) was added and the mixture was stirred under 80 °C for 18 hours. Afterwards the reaction mixture was brought to room temperature, diluted with water and extracted with EtOAc. The combined organic layers were washed with water and brine, dried over Na<sub>2</sub>SO<sub>4</sub>, filtered and the solvent was removed under reduced pressure. The crude product was purified by flash column chromatography (silica, petroleum ether) to obtain desired compound **I** as a colorless oil.

**Step 2:** The compound **I** (452.0 mg, 2.0 mmol, 1.0 equiv), CuI (76.0 mg, 0.4 mmol, 20 mol%), K<sub>3</sub>PO<sub>4</sub> (848.8 mg, 4.0 mmol, 2.0 equiv), *rac*-**J** (113.7 mg, 0.8 mmol, 40 mol%), **K** (2.4 mmol, 1.2 equiv), and DMF (10 mL) were mixed and heated to 130 °C for 24 hours under an inert atmosphere. Afterwards the reaction mixture was brought to room temperature, diluted with water and extracted with EtOAc. The combined organic layers were washed with water and brine, dried over Na<sub>2</sub>SO<sub>4</sub>, filtered and the solvent was removed under reduced pressure. The crude product was purified by flash column chromatography (silica, EtOAc/petroleum ether = 1:20) to obtain desired compound **1u** or **1v**.

### General Procedure E

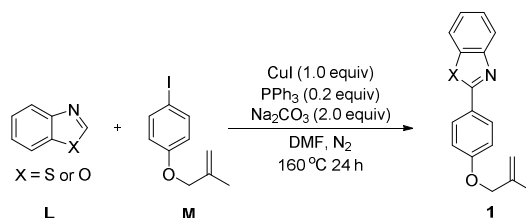

**Step :** Add **L** (2.0 mmol, 1.0 equiv), **M** (657.6 mg, 2.4 mmol, 1.2 equiv), CuI (380.9 mg, 2 mmol, 1.0 equiv), PPh<sub>3</sub> (104.9 mg, 0.4 mmol, 0.2 equiv), Na<sub>2</sub>CO<sub>3</sub> (424.0 mg, 4 mmol, 2.0equiv) and DMF (10 mL) in a 25 mL two-necked flask. Stir the resulting mixture under N<sub>2</sub> (with balloon) for 24 hours at 160 °C. Afterwards the reaction mixture was brought to room temperature, diluted with water and extracted with EtOAc. The combined organic layers were washed with water and brine, dried over Na<sub>2</sub>SO<sub>4</sub>, filtered and the solvent was removed under reduced pressure. The crude product was purified by flash column chromatography (silica, EtOAc/petroleum ether = 1:50) to obtain desired compound **1**.

### General Procedure F

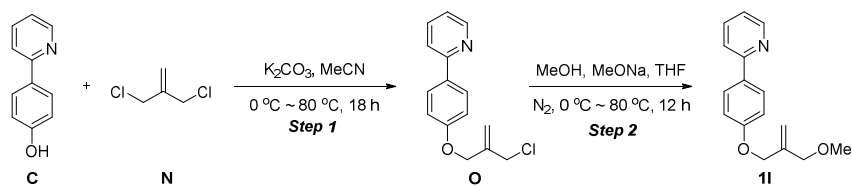

**Step 1:** To a solution of compound **C** (1.710 g, 10.0 mmol, 1.0 equiv), and potassium carbonate (2.764 g, 20.0 mmol, 2.0 equiv) in MeCN (10.0 mL), compound **N** (2.480 g, 20.0 mmol, 2.0 equiv) was added and the mixture was stirred under 0 °C. The cold bath was removed and the mixture was stirred at 80 °C for 18 hours. Afterwards the reaction mixture was brought to room temperature, diluted with water and extracted with EtOAc. The combined organic layers were washed with water and brine, dried over Na<sub>2</sub>SO<sub>4</sub>, filtered and the solvent was removed under reduced pressure. The crude product was purified by flash column chromatography (silica, EtOAc/petroleum ether = 1:15) to obtain desired compound **O**.

**Step 2:** The compound **O** (518.1 mg, 2.0 mmol, 1.0 equiv), MeOH (448.0 mg, 14.0 mmol, 7.0 equiv), MeONa (302.5 mg, 5.6 mmol, 2.8 equiv) and THF (10 mL) were mixed and the mixture was stirred under an inert atmosphere at 0 °C. The cold bath was removed and the mixture was stirred at 80 °C for 12 hours. Afterwards the reaction mixture was brought to room temperature, diluted with water and extracted with EtOAc. The combined organic layers were washed with water and brine, dried over Na<sub>2</sub>SO<sub>4</sub>, filtered and the solvent was removed under reduced pressure. The crude product was purified by flash column chromatography (silica, EtOAc/petroleum ether = 1:10) to obtain desired compound **11**.

### General Procedure G

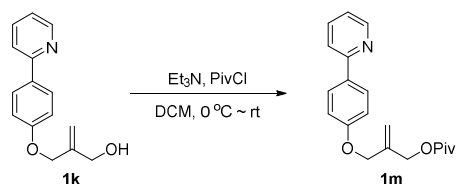

**Step :** The compound **1k** (according to the general procedure **B**) (482.2 mg, 2.0 mmol, 1.0 equiv) was dissolved in anhydrous dichloromethane (5 mL) and cooled to 0 °C. after the addition of Et<sub>3</sub>N (303.6 mg, 3.0 mmol, 1.5 equiv), a solution of pivaloyl chloride (289.4 mg, 2.4 mmol, 1.2 equiv) in 5 mL of dichloromethane was added dropwise at 0 °C. the mixture was stirred at room temperature for 2 hours and quenched with water. the aqueous layer was extracted with dichloromethane three times and the

combined organic layers were washed with saturated  $\text{NaHCO}_3$  and the brine. It was then dried over  $\text{MgSO}_4$  and evaporated under reduced pressure. The purification was made by flash column chromatography (silica, EtOAc/petroleum ether = 1:10) to give the desired compound **1m**.

### General Procedure H

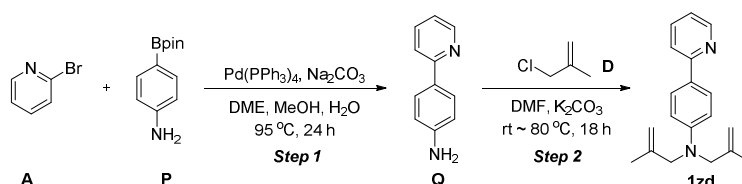

**Step 1:** Compound **A** (549.2 mg, 3.5 mmol, 1.0 equiv) was dissolved in DME (15 mL) under an inert atmosphere and a solution of compound **P** (767.0 mg, 3.5 mmol, 1.0 equiv) in MeOH (4 mL) was added followed by a solution of  $\text{Na}_2\text{CO}_3$  (742.0 mg, 7.0 mmol, 2.0 equiv) in water (4 mL). The mixture was degassed and subsequently  $\text{Pd}(\text{PPh}_3)_4$  (121.3 mg, 0.105 mmol, 0.03 equiv) was added. The reaction mixture was heated up to 95 °C for 24 hours. Afterwards the reaction mixture was brought to room temperature, diluted with water and extracted with EtOAc. The combined organic layers were washed with water and brine, dried over  $\text{Na}_2\text{SO}_4$ , filtered and the solvent was removed under reduced pressure. The crude product was purified by flash column chromatography (silica, EtOAc/petroleum ether = 1:1) to obtain desired compound **Q** (80% yield).

**Step 2:** To a solution of compound **Q** (340.2 mg, 2.0 mmol, 1.0 equiv), and potassium carbonate (552.8 mg, 4.0 mmol, 2.0 equiv) in DMF (10 mL), compound **D** (468.0 mg, 5.2 mmol, 2.6 equiv) was added and the mixture was stirred under 80 °C for 18 hours. Afterwards the reaction mixture was brought to room temperature, diluted with water and extracted with EtOAc. The combined organic layers were washed with water and brine, dried over  $\text{Na}_2\text{SO}_4$ , filtered and the solvent was removed under reduced pressure. The crude product was purified by flash column chromatography (silica, EtOAc/petroleum ether = 1:10) to obtain desired compound **1zd**.

### General Procedure I

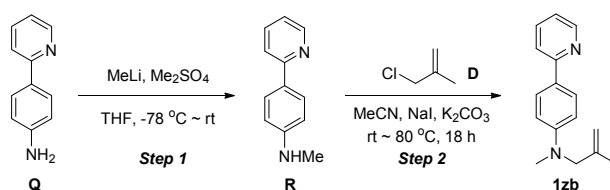



**Step 1:** A dry flask containing a magnetic stir bar was charged with compound **Q** (according to the general procedure **H**) (850.4 mg, 5 mmol, 1.0 equiv), fitted with a septa, and purged with argon for 10 minutes. The compound **Q** was dissolved in freshly distilled THF (20 mL) and the resulting solution was cooled to -78 °C. MeLi (2.85 mL, 4.85 mmol, 0.97 equiv, 1.70 M in diethyl ether) was then added dropwise over 5 minutes, and the solution was stirred at this temperature for 30 minutes. Dimethylsulfate (949.5 mg, 7.53 mmol, 1.5 equiv) was then added dropwise over 5 minutes, and the reaction was stirred for 15 minutes before being warmed to room temperature. After stirring for 2 hours at this temperature, the reaction was carefully acidified to pH 6 using 5% aqueous HCl and then diluted with diethyl ether (10 mL). The organic layer was sequentially washed with H<sub>2</sub>O (10 mL) and brine (10 mL), dried over MgSO<sub>4</sub>, filtered, and concentrated in vacuo. The crude product was purified by flash column chromatography (silica, EtOAc/petroleum ether = 1:5) to obtain desired compound **R** (50% yield).

**Step 2:** To a solution of compound **R** (368.2 mg, 2.0 mmol, 1.0 equiv), and potassium carbonate (552.8 mg, 4.0 mmol, 2.0 equiv), NaI (30.0 mg, 0.2 mmol, 0.1 equiv) in MeCN (10 mL), compound **D** (216.0 mg, 2.4 mmol, 1.2 equiv) was added and the mixture was stirred under 80 °C for 18 hours. Afterwards the reaction mixture was brought to room temperature, diluted with water and extracted with EtOAc. The combined organic layers were washed with water and brine, dried over Na<sub>2</sub>SO<sub>4</sub>, filtered and the solvent was removed under reduced pressure. The crude product was purified by flash column chromatography (silica, EtOAc/petroleum ether = 1:10) to obtain desired compound **1zb**.

### General Procedure J

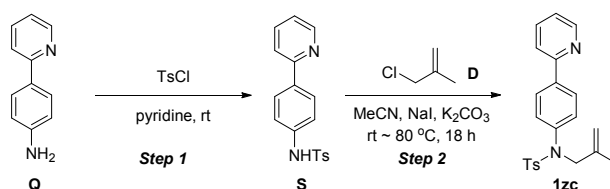

**Step 1:** To a solution of **Q** (according to the general procedure **H**) (680.3 mg, 4.0 mmol, 1.0 equiv) in pyridine (8 mL) at 0 °C was added solid tosyl chloride (797.9 mg, 4.2 mmol, 1.05 equiv) in one portion. After 2 hours, more solid tosyl chloride (797.9 mg, 4.2 mmol, 1.05 equiv) was added. After one additional hour, the reaction was quenched with H<sub>2</sub>O (10 mL) and the aqueous layer was extracted with DCM (3 x 20 mL). The combined organic layers were washed with H<sub>2</sub>O (20 mL), and brine (20 mL),

dried over  $\text{Na}_2\text{SO}_4$ , filtered and concentrated in vacuo. The crude product was purified by flash column chromatography (silica, EtOAc/petroleum ether = 1:5) to obtain desired compound **S** (80% yield).

**Step 2:** To a solution of compound **S** (648.2 mg, 2.0 mmol, 1.0 equiv), and potassium carbonate (552.8 mg, 4.0 mmol, 2.0 equiv), NaI (30.0 mg, 0.2 mmol, 0.1 equiv) in MeCN (10 mL), compound **D** (216.0 mg, 2.4 mmol, 1.2 equiv) was added and the mixture was stirred under 80 °C for 18 hours. Afterwards the reaction mixture was brought to room temperature, diluted with water and extracted with EtOAc. The combined organic layers were washed with water and brine, dried over  $\text{Na}_2\text{SO}_4$ , filtered and the solvent was removed under reduced pressure. The crude product was purified by flash column chromatography (silica, EtOAc/petroleum ether = 1:10) to obtain desired compound **1zc**.

### General Procedure K

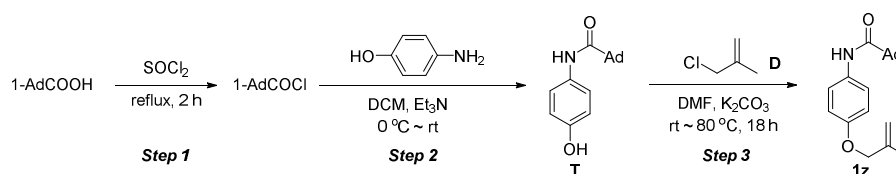

**Step 1:** Add thionyl chloride (10 mL) dropwise to 1-AdCOOH (1.80 g, 10 mmol), followed by a catalytic amount of DMF (2 drops) at 0 °C. Allow the reaction mixture to reflux for 2 hours. Remove the solvent under reduced pressure. The crude product was used to next reaction without further purification.

**Step 2:** 4-Aminophenol (1.035g, 9.5 mmol, 1.0 equiv) was dissolved in anhydrous dichloromethane (20 mL) and cooled to 0 °C, after the addition of  $\text{Et}_3\text{N}$  (1.442g, 14.25 mmol, 1.5 equiv), a solution of 1-AdCOCl (1.980 g, 10 mmol, 1.05 equiv) in 5 mL of dichloromethane was added dropwise at 0 °C. The mixture was stirred at room temperature for 2 hours and quenched with water, the aqueous layer was extracted with dichloromethane three times and the combined organic layers were washed with saturated  $\text{NaHCO}_3$  and the brine. It was then dried over  $\text{Na}_2\text{SO}_4$  and evaporated under reduced pressure. The purification was made by flash column chromatography (silica, EtOAc/petroleum ether = 1:2) to give the desired compound **T**.

**Step 3:** To a solution of compound **T** (542.3 mg, 2.0 mmol, 1.0 equiv), and potassium carbonate (552.8 mg, 4.0 mmol, 2.0 equiv) in DMF (10 mL), compound **D** (234.0 mg, 2.6 mmol, 1.3 equiv) was added and the mixture was stirred under 80 °C for 18 hours. Afterwards the reaction mixture was brought to

room temperature, diluted with water and extracted with EtOAc. The combined organic layers were washed with water and brine, dried over Na<sub>2</sub>SO<sub>4</sub>, filtered and the solvent was removed under reduced pressure. The crude product was purified by flash column chromatography (silica, EtOAc/petroleum ether = 1:5) to obtain desired compound **1z**.

### General Procedure L

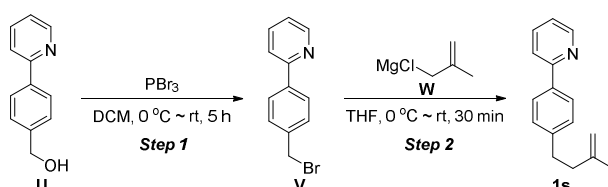

**Step 1:** To a solution of **U** (according to the general procedure **A**) (925.4 mg, 5.0 mmol, 1.0 equiv) in DCM (25 mL) at 0 °C was added PBr<sub>3</sub> (4 mL), the reaction mixture was warmed to room temperature and monitored by TLC. Upon completion the reaction mixture was poured into an aqueous solution of K<sub>2</sub>CO<sub>3</sub> (10 mL), the phases were separated and the aqueous phase was extracted with EtOAc. The combined organic layers were washed with water and brine, dried over Na<sub>2</sub>SO<sub>4</sub>, filtered and the solvent was removed under reduced pressure. The crude product was purified by flash column chromatography (silica, EtOAc/petroleum ether = 1:3) to obtain desired compound **V** (70% yield).

**Step 2:** To a solution of **V** (494.0 mg, 2.0 mmol, 1.0 equiv) in anhydrous THF (6 mL) at 0 °C under N<sub>2</sub> atmosphere was added **W** (0.5 M in THF, 6.0 mL, 3.0 mmol, 1.5 equiv), the reaction mixture was warmed to room temperature and monitored by TLC (30 min). Upon completion the reaction mixture was poured into water and extracted with EtOAc. The combined organic layers were washed with water and brine, dried over Na<sub>2</sub>SO<sub>4</sub>, filtered and the solvent was removed under reduced pressure. The crude product was purified by flash column chromatography (silica, EtOAc/petroleum ether = 1:10) to obtain desired compound **1s**.

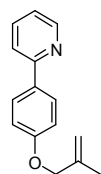

2-(4-((2-methylallyl)oxy)phenyl)pyridine (**1a**). (According to the general procedure **A**). Yellow solid (427.5 mg, 95%, m.p. 46 - 47 °C). <sup>1</sup>H NMR (400 MHz, CDCl<sub>3</sub>) δ 8.64 (ddd, *J* = 4.8, 1.6, 1.1 Hz, 1H), 7.97 – 7.88 (m, 2H), 7.70 – 7.61 (m, 2H), 7.13 (ddd, *J* = 6.6, 4.8, 1.6 Hz, 1H), 7.05 – 6.96 (m, 2H), 5.11 (d, *J* = 0.5 Hz, 1H), 4.99 (s, 1H), 4.47 (s, 2H), 1.83 (s, 3H). <sup>13</sup>C NMR (100 MHz, CDCl<sub>3</sub>) δ 159.7, 157.2, 149.6, 140.8, 136.7, 132.2, 128.2, 121.5, 119.8, 115.0, 112.9, 71.8, 19.5. HRMS (ESI-TOF) *m/z*: [M + H]<sup>+</sup> Calcd for C<sub>15</sub>H<sub>16</sub>NO<sup>+</sup> 226.1226, Found: 226.1223.

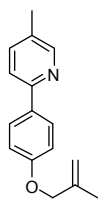

5-methyl-2-(4-((2-methylallyl)oxy)phenyl)pyridine (**1b**). (According to the general procedure A). White solid (444.7 mg, 93%, m.p. 57 - 58 °C). <sup>1</sup>H NMR (400 MHz, CDCl<sub>3</sub>) δ 8.47 (dd, *J* = 1.4, 0.7 Hz, 1H), 7.96 – 7.85 (m, 2H), 7.54 (d, *J* = 8.1 Hz, 1H), 7.52 – 7.45 (m, 1H), 7.04 – 6.94 (m, 2H), 5.12 (d, *J* = 0.5 Hz, 1H), 5.00 (s, 1H), 4.47 (s, 2H), 2.33 (s, 3H), 1.84 (s, 3H). <sup>13</sup>C NMR (100 MHz, CDCl<sub>3</sub>) δ 159.4, 154.5, 150.0, 140.8, 137.3, 132.3, 130.8, 127.9, 119.3, 115.0, 112.8, 71.8, 19.5, 18.2. HRMS (ESI-TOF) *m/z*: [M + H]<sup>+</sup> Calcd for C<sub>16</sub>H<sub>18</sub>NO<sup>+</sup> 240.1383, Found: 240.1386.

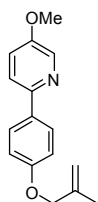

5-methoxy-2-(4-((2-methylallyl)oxy)phenyl)pyridine (**1c**). (According to the general procedure A). Brown solid (469.4 mg, 92%, m.p. 73 - 74 °C). <sup>1</sup>H NMR (400 MHz, CDCl<sub>3</sub>) δ 8.35 (d, *J* = 2.7 Hz, 1H), 7.89 – 7.80 (m, 2H), 7.58 (d, *J* = 8.7 Hz, 1H), 7.22 (dd, *J* = 8.7, 3.0 Hz, 1H), 7.02 – 6.95 (m, 2H), 5.12 (d, *J* = 0.5 Hz, 1H), 5.00 (s, 1H), 4.47 (s, 2H), 3.87 (s, 3H), 1.85 (s, 3H). <sup>13</sup>C NMR (100 MHz, CDCl<sub>3</sub>) δ 159.1, 154.4, 150.1, 140.9, 137.0, 132.1, 127.6, 121.5, 120.1, 115.0, 112.9, 71.83, 55.7, 19.5. HRMS (ESI-TOF) *m/z*: [M + H]<sup>+</sup> Calcd for C<sub>16</sub>H<sub>18</sub>NO<sub>2</sub><sup>+</sup> 256.1332, Found: 256.1332.

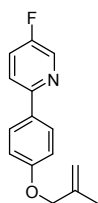

5-fluoro-2-(4-((2-methylallyl)oxy)phenyl)pyridine (**1d**). (According to the general procedure A). White solid (432.5 mg, 89%, m.p. 72 - 73 °C). <sup>1</sup>H NMR (600 MHz, CDCl<sub>3</sub>) δ 8.50 (d, *J* = 2.5 Hz, 1H), 7.87 (d, *J* = 8.7 Hz, 2H), 7.66 – 7.60 (m, 1H), 7.42 (t, *J* = 8.4 Hz, 1H), 7.00 (d, *J* = 8.6 Hz, 2H), 5.12 (s, 1H), 5.01 (s, 1H), 4.49 (s, 2H), 1.85 (s, 3H). <sup>13</sup>C NMR (150 MHz, CDCl<sub>3</sub>) δ 159.7, 158.6 (d, *J* = 255.2 Hz, 1C), 153.6 (d, *J* = 3.5 Hz, 1C), 140.8, 137.5 (d, *J* = 23.3 Hz, 1C), 131.2, 128.1, 123.7 (d, *J* = 18.6 Hz, 1C), 120.7 (d, *J* = 4.2 Hz, 1C), 115.1, 113.0, 71.9, 19.5. <sup>19</sup>F NMR (565 MHz, CDCl<sub>3</sub>) δ -130.9. HRMS (ESI-TOF) *m/z*: [M + H]<sup>+</sup> Calcd for C<sub>15</sub>H<sub>15</sub>FNO<sup>+</sup> 244.1132, Found: 244.1135.

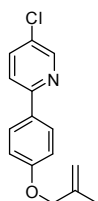

5-chloro-2-(4-((2-methylallyl)oxy)phenyl)pyridine (**1e**). (According to the general procedure A). White solid (471.4 mg, 91%, m.p. 81 - 82 °C). <sup>1</sup>H NMR (400 MHz, CDCl<sub>3</sub>) δ 8.58 (dd, *J* = 2.4, 0.5 Hz, 1H), 7.94 – 7.85 (m, 2H), 7.68 – 7.61 (m, 1H), 7.61 – 7.55 (m, 1H), 7.05 – 6.93 (m, 2H), 5.12 (s, 1H), 5.01 (s, 1H), 4.48 (s, 2H), 1.85 (s, 3H). <sup>13</sup>C NMR (100 MHz, CDCl<sub>3</sub>) δ 160.0, 155.3, 148.4, 140.7, 136.4, 131.0, 129.8, 128.1, 120.4, 115.1, 113.0, 71.8, 19.5. HRMS (ESI-TOF) *m/z*: [M + H]<sup>+</sup> Calcd for C<sub>15</sub>H<sub>15</sub>ClNO<sup>+</sup> 260.0837, Found: 260.0840.

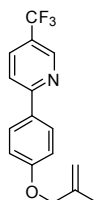

2-(4-((2-methylallyl)oxy)phenyl)-5-(trifluoromethyl)pyridine (**1f**). (According to the general procedure A). White solid (498.1 mg, 85%, m.p. 95 - 96 °C). <sup>1</sup>H NMR (600 MHz, CDCl<sub>3</sub>) δ 8.90 (s, 1H), 8.00 (d, *J* = 8.7 Hz, 2H), 7.94 – 7.88 (m, 1H), 7.78 – 7.71 (m, 1H), 7.03 (d, *J* = 8.5 Hz, 2H), 5.13 (s, 1H), 5.02 (s, 1H), 4.50 (s, 2H), 1.86 (s, 3H). <sup>13</sup>C NMR (150 MHz, CDCl<sub>3</sub>) δ 160.7, 160.3, 146.6 (q, *J* = 3.9 Hz, 1C), 140.6, 133.9 (q, *J* = 2.8 Hz, 1C), 130.6, 128.7, 124.1 (q, *J* = 33.0 Hz, 1C), 124.0 (q, *J* = 271.9 Hz, 1C), 119.1, 115.3, 113.1, 71.9, 19.5. <sup>19</sup>F NMR (565 MHz, CDCl<sub>3</sub>) δ -62.2. HRMS (ESI-TOF) *m/z*: [M + H]<sup>+</sup> Calcd for C<sub>16</sub>H<sub>15</sub>F<sub>3</sub>NO<sup>+</sup> 294.1100, Found: 294.1099.

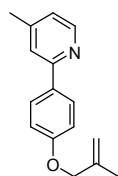

4-methyl-2-(4-((2-methylallyl)oxy)phenyl)pyridine (**1g**). (According to the general procedure A). Brown solid (392.1 mg, 82%, m.p. 41 - 42 °C). <sup>1</sup>H NMR (400 MHz, CDCl<sub>3</sub>) δ 8.50 (d, *J* = 5.0 Hz, 1H), 7.96 – 7.88 (m, 2H), 7.50 – 7.46 (m, 1H), 7.04 – 6.95 (m, 3H), 5.12 (d, *J* = 0.5 Hz, 1H), 5.00 (s, 1H), 4.48 (s, 2H), 2.38 (s, 3H), 1.85 (s, 3H). <sup>13</sup>C NMR (101 MHz, CDCl<sub>3</sub>) δ 159.6, 157.1, 149.4, 147.7, 140.8, 132.3, 128.2, 122.6, 120.8, 115.0, 112.9, 71.8, 21.3, 19.5. HRMS (ESI-TOF) *m/z*: [M + H]<sup>+</sup> Calcd for C<sub>16</sub>H<sub>18</sub>NO<sup>+</sup> 240.1383, Found: 240.1382.

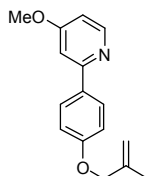

4-methoxy-2-(4-((2-methylallyl)oxy)phenyl)pyridine (**1h**). (According to the general procedure A). Colorless oil (443.7 mg, 87%). <sup>1</sup>H NMR (600 MHz, CDCl<sub>3</sub>) δ 8.46 (d, *J* = 5.7 Hz, 1H), 7.90 (d, *J* = 8.7 Hz, 2H), 7.15 (d, *J* = 1.9 Hz, 1H), 6.99 (d, *J* = 8.7 Hz, 2H), 6.71 (dd, *J* = 5.7, 2.0 Hz, 1H), 5.11 (s, 1H), 5.00 (s, 1H), 4.47 (s, 2H), 3.87 (s, 3H), 1.84 (s, 3H). <sup>13</sup>C NMR (150 MHz, CDCl<sub>3</sub>) δ 166.5, 159.8, 158.9, 150.8, 140.8, 132.1, 128.3, 115.0, 112.9, 107.6, 106.1, 71.8, 55.2, 19.5. HRMS (ESI-TOF) *m/z*: [M + H]<sup>+</sup> Calcd for C<sub>16</sub>H<sub>18</sub>NO<sub>2</sub><sup>+</sup> 256.1332, Found: 256.1331.

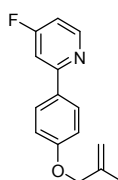

4-fluoro-2-(4-((2-methylallyl)oxy)phenyl)pyridine (**1i**). (According to the general procedure A). Brown solid (427.7 mg, 88%, m.p. 47 - 48 °C). <sup>1</sup>H NMR (400 MHz, CDCl<sub>3</sub>) δ 8.59 (dd, *J* = 8.9, 5.6 Hz, 1H), 7.95 – 7.89 (m, 2H), 7.36 (dd, *J* = 10.6, 2.3 Hz, 1H), 7.04 – 6.98 (m, 2H), 6.90 (ddd, *J* = 8.2, 5.6, 2.3 Hz, 1H), 5.12 (dd, *J* = 1.3, 0.8 Hz, 1H), 5.01 (s, 1H), 4.49 (s, 2H), 1.85 (s, 3H). <sup>13</sup>C NMR (101 MHz, CDCl<sub>3</sub>) δ 169.5 (d, *J* = 260.6 Hz, 1C), 160.4 (d, *J* = 7.2 Hz, 1C), 160.2, 151.9 (d, *J* = 7.3 Hz, 1C), 140.7, 131.1 (d, *J* = 3.6 Hz, 1C), 128.3, 115.1, 113.0, 109.3 (d, *J* = 16.4 Hz, 1C), 107.3 (d, *J* = 17.4 Hz, 1C), 71.8, 19.5. <sup>19</sup>F NMR (376 MHz, CDCl<sub>3</sub>) δ -102.9. HRMS (ESI-TOF) *m/z*: [M + H]<sup>+</sup> Calcd for C<sub>15</sub>H<sub>15</sub>FNO<sup>+</sup> 244.1132, Found: 244.1132.

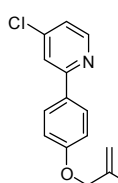

4-chloro-2-(4-((2-methylallyl)oxy)phenyl)pyridine (**1j**). (According to the general procedure A). Brown solid (461.0 mg, 89%, m.p. 56 - 57 °C). <sup>1</sup>H NMR (400 MHz, CDCl<sub>3</sub>) δ 8.52 (d, *J* = 5.3 Hz, 1H), 7.97 – 7.87 (m, 2H), 7.65 (d, *J* = 1.5 Hz, 1H), 7.16 (dd, *J* = 5.3, 1.8 Hz, 1H), 7.05 – 6.97 (m, 2H), 5.12 (s, 1H), 5.01 (s, 1H), 4.48 (s, 2H), 1.84 (s, 3H). <sup>13</sup>C NMR (100 MHz, CDCl<sub>3</sub>) δ 160.2, 158.7, 150.4, 144.7, 140.7, 130.9, 128.3, 121.6, 120.0, 115.1, 113.0, 71.8, 19.5. HRMS (ESI-TOF) *m/z*: [M + H]<sup>+</sup> Calcd for C<sub>15</sub>H<sub>15</sub>ClNO<sup>+</sup> 260.0837, Found: 260.0838.

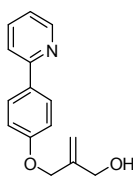

2-((4-(pyridin-2-yl)phenoxy)methyl)prop-2-en-1-ol (**1k**). (According to the general procedure B). White solid (284.4 mg, 59%, m.p. 80 - 81 °C). <sup>1</sup>H NMR (600 MHz, DMSO-*d*<sub>6</sub>) δ 8.62 (d, *J* = 4.7 Hz, 1H), 8.03 (d, *J* = 8.7 Hz, 2H), 7.92 (d, *J* = 7.9 Hz, 1H), 7.88 (t, *J* = 7.8 Hz, 1H), 7.35 – 7.30 (m, 1H), 7.07 (d, *J* = 8.7 Hz, 2H), 5.21 (s, 1H), 5.17 (s, 1H), 4.62 (s, 2H), 4.04 (s, 2H), 3.47 (br, 1H). <sup>13</sup>C NMR (150 MHz, DMSO-*d*<sub>6</sub>) δ 159.4, 155.4, 148.8, 145.2, 137.8, 130.6, 128.0, 122.0, 119.8, 114.9, 111.3, 68.1, 61.5. HRMS (ESI-TOF) *m/z*: [M + H]<sup>+</sup> Calcd for C<sub>15</sub>H<sub>16</sub>NO<sub>2</sub><sup>+</sup> 242.1176, Found: 242.1172.

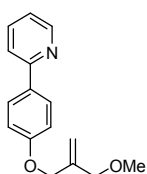

2-(4-((2-methoxymethyl)allyl)oxy)phenylpyridine (**1l**). (According to the general procedure F). White solid (397.8 mg, 78%, m.p. 31 - 32 °C). <sup>1</sup>H NMR (400 MHz,

CDCl<sub>3</sub>)  $\delta$  8.66 – 8.59 (m, 1H), 7.98 – 7.90 (m, 2H), 7.73 – 7.61 (m, 2H), 7.16 (ddd,  $J$  = 7.0, 4.9, 1.4 Hz, 1H), 7.05 – 6.98 (m, 2H), 5.36 – 5.33 (m, 1H), 5.28 (d,  $J$  = 1.1 Hz, 1H), 4.60 (s, 2H), 4.03 (s, 2H), 3.35 (s, 3H). <sup>13</sup>C NMR (100 MHz, CDCl<sub>3</sub>)  $\delta$  159.7, 157.1, 149.5, 141.3, 136.9, 132.1, 128.2, 121.5, 119.9, 115.1, 77.4, 73.4, 68.6, 58.2. HRMS (ESI-TOF)  $m/z$ : [M + H]<sup>+</sup> Calcd for C<sub>16</sub>H<sub>18</sub>NO<sub>2</sub><sup>+</sup> 256.1332, Found: 246.1327.

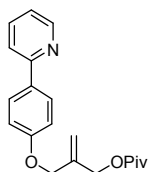

2-((4-(pyridin-2-yl)phenoxy)methyl)allyl pivalate (**1m**). (According to the general procedure **G**). Yellow solid (591.7 mg, 91%, m.p. 30 - 31 °C). <sup>1</sup>H NMR (600 MHz, CDCl<sub>3</sub>)  $\delta$  8.64 (d,  $J$  = 4.5 Hz, 1H), 7.93 (d,  $J$  = 8.1 Hz, 2H), 7.70 (dd,  $J$  = 9.6, 5.4 Hz, 1H), 7.65 (d,  $J$  = 7.9 Hz, 1H), 7.16 (t,  $J$  = 5.9 Hz, 1H), 7.00 (d,  $J$  = 8.2 Hz, 2H), 5.36 (s, 1H), 5.31 (s, 1H), 4.70 (s, 2H), 4.59 (s, 2H), 1.21 (s, 10H). <sup>13</sup>C NMR (150 MHz, CDCl<sub>3</sub>)  $\delta$  178.1, 159.5, 157.0, 149.5, 139.7, 136.9, 132.3, 128.3, 121.6, 120.0, 115.7, 115.0, 68.7, 64.6, 39.0, 27.3. HRMS (ESI-TOF)  $m/z$ : [M + H]<sup>+</sup> Calcd for C<sub>20</sub>H<sub>24</sub>NO<sub>3</sub><sup>+</sup> 326.1751, Found: 326.1753.

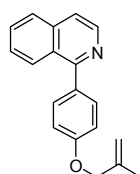

1-(4-((2-methylallyl)oxy)phenyl)isoquinoline (**1n**). (According to the general procedure **A**). Brown oil (467.5 mg, 85%). <sup>1</sup>H NMR (600 MHz, CDCl<sub>3</sub>)  $\delta$  8.58 (d,  $J$  = 5.7 Hz, 1H), 8.15 (d,  $J$  = 8.5 Hz, 1H), 7.86 (d,  $J$  = 8.2 Hz, 1H), 7.67 (dd,  $J$  = 17.2, 7.8 Hz, 3H), 7.61 (d,  $J$  = 5.5 Hz, 1H), 7.54 (d,  $J$  = 7.3 Hz, 1H), 7.08 (d,  $J$  = 8.4 Hz, 2H), 5.15 (s, 1H), 5.03 (s, 1H), 4.53 (s, 2H), 1.87 (s, 3H). <sup>13</sup>C NMR (150 MHz, CDCl<sub>3</sub>)  $\delta$  160.4, 159.4, 142.1, 140.8, 137.1, 132.1, 131.4, 130.1, 127.8, 127.2, 127.1, 126.8, 119.7, 114.8, 113.0, 71.9, 19.5. HRMS (ESI-TOF)  $m/z$ : [M + H]<sup>+</sup> Calcd for C<sub>19</sub>H<sub>18</sub>NO<sup>+</sup> 276.1383, Found: 276.1383.

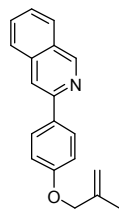

3-(4-((2-methylallyl)oxy)phenyl)isoquinoline (**1o**). (According to the general procedure **A**). White solid (473.0 mg, 86%, m.p. 72 - 73 °C). <sup>1</sup>H NMR (400 MHz, CDCl<sub>3</sub>)  $\delta$  9.30 (s, 1H), 8.11 – 8.05 (m, 2H), 7.95 (s, 1H), 7.93 (d,  $J$  = 8.2 Hz, 1H), 7.79 (d,  $J$  = 8.1 Hz, 1H), 7.63 (ddd,  $J$  = 8.2, 6.9, 1.2 Hz, 1H), 7.51 (ddd,  $J$  = 8.0, 6.9, 1.1 Hz, 1H), 7.09 – 7.01 (m, 2H), 5.15 (s, 1H), 5.03 (s, 1H), 4.50 (s, 2H), 1.87 (s, 3H). <sup>13</sup>C NMR (100 MHz, CDCl<sub>3</sub>)  $\delta$  159.4, 152.2, 151.0, 140.8, 136.8, 132.3, 130.5, 128.2, 127.6, 127.4, 126.8, 126.7, 115.4, 115.1, 112.9, 71.8, 19.5. HRMS (ESI-TOF)  $m/z$ : [M + H]<sup>+</sup> Calcd for C<sub>19</sub>H<sub>18</sub>NO<sup>+</sup> 276.1383, Found: 276.1381.

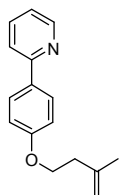

2-(4-((3-methylbut-3-en-1-yl)oxy)phenyl)pyridine (**1p**). (According to the general procedure **B**). White solid (277.2 mg, 58%, m.p. 39 - 40 °C). <sup>1</sup>H NMR (600 MHz, CDCl<sub>3</sub>)  $\delta$  8.65 (d,  $J$  = 4.7 Hz, 1H), 7.95 (d,  $J$  = 8.4 Hz, 2H), 7.69 (t,  $J$  = 7.6 Hz, 1H), 7.65 (d,  $J$  = 7.9 Hz, 1H), 7.18 – 7.13 (m, 1H), 7.00 (d,  $J$  = 8.4 Hz, 2H), 4.86 (s, 1H), 4.82 (s, 1H), 4.13 (t,  $J$  = 6.8 Hz, 2H), 2.53 (t,  $J$  = 6.8 Hz, 2H), 1.82 (s, 3H). <sup>13</sup>C NMR (150 MHz, CDCl<sub>3</sub>)  $\delta$  159.9, 157.2, 149.5, 142.2, 136.8, 132.0, 128.2, 121.5, 119.9, 114.8, 112.2, 66.6, 37.3, 22.9. HRMS (ESI-TOF)  $m/z$ : [M + H]<sup>+</sup> Calcd for C<sub>16</sub>H<sub>18</sub>NO<sup>+</sup> 240.1383, Found: 240.1383.

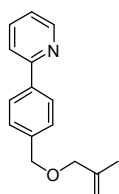

2-(4-(((2-methylallyl)oxy)methyl)phenyl)pyridine (**1q**). (According to the general procedure **A**). Yellow oil (425.4 mg, 89%). <sup>1</sup>H NMR (600 MHz, CDCl<sub>3</sub>)  $\delta$  8.70 (d,  $J$  = 4.7 Hz, 1H), 7.97 (d,  $J$  = 7.9 Hz, 2H), 7.73 (dd,  $J$  = 14.2, 7.5 Hz, 2H), 7.46 (d,  $J$  = 7.9 Hz, 2H), 7.25 – 7.20 (m, 1H), 5.02 (s, 1H), 4.94 (s, 1H), 4.55 (s, 2H), 3.96 (s, 2H), 1.78 (s, 3H). <sup>13</sup>C

NMR (150 MHz, CDCl<sub>3</sub>)  $\delta$  157.3, 149.6, 142.2, 139.5, 138.5, 137.1, 128.1, 127.1, 122.2, 120.8, 112.5, 74.3, 71.6, 19.7. HRMS (ESI-TOF)  $m/z$ : [M + H]<sup>+</sup> Calcd for C<sub>16</sub>H<sub>18</sub>NO<sup>+</sup> 240.1383, Found: 240.1383.

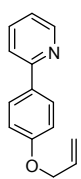

2-(4-(allyloxy)phenyl)pyridine (**1r**). (According to the general procedure A). Yellow solid (392.5 mg, 93%, m.p. 36 - 37 °C). <sup>1</sup>H NMR (600 MHz, CDCl<sub>3</sub>)  $\delta$  8.65 (d,  $J$  = 4.5 Hz, 1H), 7.95 (d,  $J$  = 8.5 Hz, 2H), 7.72 – 7.62 (m, 2H), 7.16 (dt,  $J$  = 7.3, 3.9 Hz, 1H), 7.01 (d,  $J$  = 7.6 Hz, 2H), 6.11 – 6.00 (m, 1H), 5.43 (d,  $J$  = 17.3 Hz, 1H), 5.33 – 5.27 (m, 1H), 4.58 (dd,  $J$  = 3.4, 1.6 Hz, 2H). <sup>13</sup>C NMR (150 MHz, CDCl<sub>3</sub>)  $\delta$  159.6, 157.1, 149.5, 136.8, 133.2, 132.1, 128.2, 121.5, 119.9, 117.9, 115.0, 68.9. HRMS (ESI-TOF)  $m/z$ : [M + H]<sup>+</sup> Calcd for C<sub>14</sub>H<sub>14</sub>NO<sup>+</sup> 212.1070, Found: 212.1071.

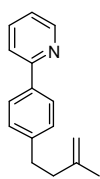

2-(4-(3-methylbut-3-en-1-yl)phenyl)pyridine (**1s**). (According to the general procedure L). Colorless oil (267.6 mg, 60%). <sup>1</sup>H NMR (400 MHz, CDCl<sub>3</sub>)  $\delta$  8.74 – 8.60 (m, 1H), 7.95 – 7.90 (m, 2H), 7.76 – 7.69 (m, 2H), 7.31 (d,  $J$  = 8.3 Hz, 2H), 7.20 (ddd,  $J$  = 6.1, 4.9, 2.4 Hz, 1H), 4.76 (s, 2H), 4.73 (s, 1H), 2.82 (dd,  $J$  = 9.2, 6.9 Hz, 2H), 2.40 – 2.31 (m, 2H), 1.79 (s, 3H). <sup>13</sup>C NMR (100 MHz, CDCl<sub>3</sub>)  $\delta$  157.5, 149.7, 145.3, 143.4, 137.0, 136.8, 128.9, 127.0, 121.9, 120.4, 110.5, 39.5, 34.1, 22.7. HRMS (ESI-TOF)  $m/z$ : [M + H]<sup>+</sup> Calcd for C<sub>16</sub>H<sub>18</sub>N<sup>+</sup> 224.1434, Found: 224.1435.

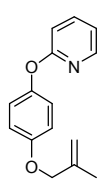

2-(4-((2-methylallyl)oxy)phenoxy)pyridine (**1t**). (According to the general procedure C). Yellow oil (429.0 mg, 89%). <sup>1</sup>H NMR (600 MHz, CDCl<sub>3</sub>)  $\delta$  8.19 (dd,  $J$  = 4.9, 0.8 Hz, 1H), 7.65 (d,  $J$  = 0.8 Hz, 1H), 7.06 (d,  $J$  = 8.9 Hz, 2H), 7.00 – 6.92 (m, 3H), 6.86 (d,  $J$  = 8.3 Hz, 1H), 5.11 (s, 1H), 5.00 (s, 1H), 4.43 (s, 2H), 1.84 (s, 3H). <sup>13</sup>C NMR (150 MHz, CDCl<sub>3</sub>)  $\delta$  164.3, 155.9, 147.7, 147.6, 141.0, 139.5, 122.4, 118.2, 115.8, 112.9, 111.2, 72.3, 19.5. HRMS (ESI-TOF)  $m/z$ : [M + H]<sup>+</sup> Calcd for C<sub>15</sub>H<sub>16</sub>NO<sub>2</sub><sup>+</sup> 242.1176, Found: 242.1178.

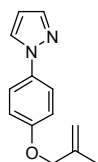

1-(4-((2-methylallyl)oxy)phenyl)-1H-pyrazole (**1u**). (According to the general procedure D). White solid (321.2 mg, 75%, m.p. 43 - 44 °C). <sup>1</sup>H NMR (600 MHz, CDCl<sub>3</sub>)  $\delta$  7.79 (d,  $J$  = 4.0 Hz, 1H), 7.68 (s, 1H), 7.59 – 7.53 (m, 2H), 7.00 – 6.91 (m, 2H), 6.40 (s, 1H), 5.10 (s, 1H), 5.00 (s, 1H), 4.43 (s, 2H), 1.82 (s, 3H). <sup>13</sup>C NMR (150 MHz, CDCl<sub>3</sub>)  $\delta$  157.3, 140.6, 140.5, 134.0, 126.7, 120.7, 115.4, 112.9, 107.1, 72.0, 19.4. HRMS (ESI-TOF)  $m/z$ : [M + H]<sup>+</sup> Calcd for C<sub>13</sub>H<sub>15</sub>N<sub>2</sub>O<sup>+</sup> 215.1179, Found: 215.1179.

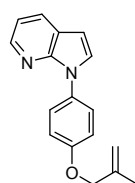

1-(4-((2-methylallyl)oxy)phenyl)-1H-pyrrolo[2,3-*b*]pyridine (**1v**). (According to the general procedure D). Yellow oil (369.7 mg, 70%). <sup>1</sup>H NMR (600 MHz, CDCl<sub>3</sub>)  $\delta$  8.38 (d,  $J$  = 4.6 Hz, 1H), 7.97 (d,  $J$  = 7.8 Hz, 1H), 7.61 (d,  $J$  = 8.8 Hz, 2H), 7.44 (d,  $J$  = 3.5 Hz, 1H), 7.12 (dd,  $J$  = 7.8, 4.7 Hz, 1H), 7.07 (d,  $J$  = 8.9 Hz, 2H), 6.60 (d,  $J$  = 3.5 Hz, 1H), 5.14 (s, 1H), 5.02 (s, 1H), 4.49 (s, 2H), 1.86 (s, 3H). <sup>13</sup>C NMR (150 MHz, CDCl<sub>3</sub>)  $\delta$  157.4, 147.6, 143.5, 140.8, 131.7, 129.2, 128.4, 125.6, 121.4, 116.5, 115.6, 113.0, 101.1, 72.2, 19.5. HRMS (ESI-TOF)  $m/z$ : [M + H]<sup>+</sup> Calcd for C<sub>17</sub>H<sub>17</sub>N<sub>2</sub>O<sup>+</sup> 265.1335, Found: 265.1337.

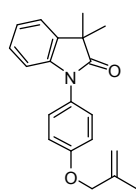

3,3-dimethyl-1-(4-((2-methylallyl)oxy)phenyl)indolin-2-one (**1w**). (According to the general procedure **D**, 3,3-dimethylindolin-2-one<sup>6</sup> was used). White solid (478.9 mg, 78%, m.p. 55 - 56 °C). <sup>1</sup>H NMR (600 MHz, CDCl<sub>3</sub>) δ 7.35 – 7.29 (m, 2H), 7.27 (d, *J* = 7.3 Hz, 1H), 7.19 (t, *J* = 7.7 Hz, 1H), 7.11 – 7.04 (m, 3H), 6.80 (d, *J* = 7.8 Hz, 1H), 5.13 (s, 1H), 5.03 (s, 1H), 4.49 (s, 2H), 1.86 (s, 3H), 1.49 (s, 6H). <sup>13</sup>C NMR (150 MHz, CDCl<sub>3</sub>) δ 181.0, 158.3, 143.0, 140.7, 135.7, 127.9, 127.6, 127.4, 122.9, 122.6, 115.8, 113.1, 109.4, 72.1, 44.3, 24.8, 19.5. HRMS (ESI-TOF) *m/z*: [M + H]<sup>+</sup> Calcd for C<sub>20</sub>H<sub>22</sub>NO<sub>2</sub><sup>+</sup> 308.1645, Found: 308.1645.

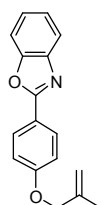

2-(4-((2-methylallyl)oxy)phenyl)benzo[*d*]oxazole (**1x**). (According to the general procedure **E**). White solid (413.4 mg, 78%, m.p. 75 - 76 °C). <sup>1</sup>H NMR (400 MHz, CDCl<sub>3</sub>) δ 8.13 – 8.07 (m, 2H), 7.69 – 7.64 (m, 1H), 7.48 – 7.42 (m, 1H), 7.28 – 7.18 (m, 2H), 6.96 – 6.91 (m, 2H), 5.04 (s, 1H), 4.94 (s, 1H), 4.39 (s, 2H), 1.76 (s, 3H). <sup>13</sup>C NMR (100 MHz, CDCl<sub>3</sub>) δ 163.1, 161.5, 150.7, 142.3, 140.3, 129.4, 124.6, 124.4, 119.7, 119.6, 115.1, 113.1, 110.4, 71.7, 19.4. HRMS (ESI-TOF) *m/z*: [M + H]<sup>+</sup> Calcd for C<sub>17</sub>H<sub>16</sub>NO<sub>2</sub><sup>+</sup> 266.1176, Found: 266.1177.

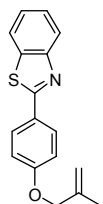

2-(4-((2-methylallyl)oxy)phenyl)benzo[*d*]thiazole (**1y**). (According to the general procedure **E**). White solid (286.6 mg, 51%, m.p. 74 - 75 °C). <sup>1</sup>H NMR (400 MHz, CDCl<sub>3</sub>) δ 8.07 – 8.00 (m, 3H), 7.85 (d, *J* = 7.9 Hz, 1H), 7.50 – 7.43 (m, 1H), 7.37 – 7.31 (m, 1H), 7.04 – 6.97 (m, 2H), 5.13 (s, 1H), 5.03 (s, 1H), 4.48 (s, 2H), 1.85 (s, 3H). <sup>13</sup>C NMR (100 MHz, CDCl<sub>3</sub>) δ 167.9, 161.2, 154.3, 140.4, 134.9, 129.1, 126.6, 126.3, 124.8, 122.9, 121.6, 115.2, 113.2, 71.9, 19.5. HRMS (ESI-TOF) *m/z*: [M + H]<sup>+</sup> Calcd for C<sub>17</sub>H<sub>16</sub>NOS<sup>+</sup> 282.0947, Found: 282.0946.

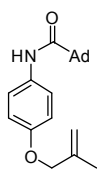

(3*r*,5*r*,7*r*)-*N*-(4-((2-methylallyl)oxy)phenyl)adamantane-1-carboxamide (**1z**). (According to the general procedure **K**). White solid (578.9 mg, 89%, m.p. 157 - 158 °C). <sup>1</sup>H NMR (600 MHz, CDCl<sub>3</sub>) δ 7.44 – 7.37 (m, 1H), 7.29 (s, 0H), 6.84 (d, *J* = 8.8 Hz, 1H), 5.06 (s, 1H), 4.96 (s, 1H), 4.39 (s, 1H), 2.07 (s, 2H), 1.94 (s, 3H), 1.80 (s, 2H), 1.73 (dd, *J* = 27.3, 12.3 Hz, 3H). <sup>13</sup>C NMR (150 MHz, CDCl<sub>3</sub>) δ 176.0, 155.5, 140.9, 131.4, 121.8, 115.1, 112.7, 72.0, 41.3, 39.3, 36.5, 28.2, 19.4. HRMS (ESI-TOF) *m/z*: [M + H]<sup>+</sup> Calcd for C<sub>21</sub>H<sub>28</sub>NO<sub>2</sub><sup>+</sup> 326.2115, Found: 326.2112.

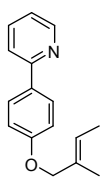

(*E*)-2-(4-((2-methylbut-2-en-1-yl)oxy)phenyl)pyridine (**1za**). (According to the general procedure **A**, (*E*)-1-bromo-2-methylbut-2-ene<sup>7</sup> was used). Yellow oil (215.1 mg, 45%). <sup>1</sup>H NMR (400 MHz, CDCl<sub>3</sub>) δ 8.65 (ddd, *J* = 4.8, 1.7, 1.0 Hz, 1H), 7.96 – 7.91 (m, 2H), 7.73 – 7.63 (m, 2H), 7.16 (ddd, *J* = 7.0, 4.8, 1.4 Hz, 1H), 7.04 – 6.98 (m, 2H), 5.66 (ddd, *J* = 6.7, 2.5, 1.2 Hz, 1H), 4.44 (s, 2H), 1.75 (s, 3H), 1.68 (dd, *J* = 6.7, 1.0 Hz, 3H). <sup>13</sup>C NMR (100 MHz, CDCl<sub>3</sub>) δ 160.0, 157.3, 149.6, 136.8, 132.0, 131.7, 128.2, 123.7, 121.5, 119.9, 115.1, 74.2, 13.7, 13.4. HRMS (ESI-TOF) *m/z*: [M + H]<sup>+</sup> Calcd for C<sub>16</sub>H<sub>18</sub>NO<sup>+</sup> 240.1383, Found: 240.1379.

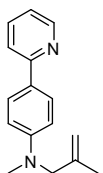

*N*-methyl-*N*-(2-methylallyl)-4-(pyridin-2-yl)aniline (**1zb**). (According to the general procedure **I**). Brown oil (371.4 mg, 78%). <sup>1</sup>H NMR (600 MHz, CDCl<sub>3</sub>) δ 8.61 (d, *J* = 4.7 Hz, 1H), 7.90 (d, *J* = 8.8 Hz, 2H), 7.64 (dd, *J* = 13.3, 7.5 Hz, 2H), 7.12 – 7.05 (m, 1H), 6.75 (d,



$J = 8.7$  Hz, 2H), 4.87 (s, 1H), 4.79 (s, 1H), 3.87 (s, 2H), 3.02 (s, 3H), 1.73 (s, 3H).  $^{13}\text{C}$  NMR (150 MHz,  $\text{CDCl}_3$ )  $\delta$  157.7, 150.3, 149.3, 141.0, 136.7, 127.9, 126.9, 120.6, 119.2, 111.9, 111.0, 58.6, 38.4, 20.2. HRMS (ESI-TOF)  $m/z$ :  $[\text{M} + \text{H}]^+$  Calcd for  $\text{C}_{16}\text{H}_{19}\text{N}_2^+$  239.1543, Found: 239.1544.

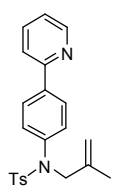

4-methyl-*N*-(2-methylallyl)-*N*-(4-(pyridin-2-yl)phenyl)benzenesulfonamide (**1zc**).

(According to the general procedure **J**). White solid (642.6 mg, 85%, m.p. 124 - 125 °C).

$^1\text{H}$  NMR (600 MHz,  $\text{CDCl}_3$ )  $\delta$  8.69 – 8.62 (m, 1H), 7.91 (d,  $J = 8.3$  Hz, 2H), 7.74 (s, 1H), 7.71 (s, 1H), 7.47 (d,  $J = 7.9$  Hz, 2H), 7.23 (d,  $J = 7.8$  Hz, 3H), 7.15 (d,  $J = 8.2$  Hz, 2H), 4.74 (s, 1H), 4.73 (s, 1H), 4.13 (s, 2H), 2.40 (s, 3H), 1.75 (s, 3H).  $^{13}\text{C}$  NMR (150 MHz,  $\text{CDCl}_3$ )  $\delta$  156.4, 149.6, 143.6, 139.7, 138.4, 137.1, 135.1, 129.6, 128.7, 127.8, 127.3, 122.5, 120.7,

115.5, 56.6, 21.6, 20.0. HRMS (ESI-TOF)  $m/z$ :  $[\text{M} + \text{H}]^+$  Calcd for  $\text{C}_{22}\text{H}_{23}\text{N}_2\text{O}_2\text{S}^+$  379.1475, Found: 379.1478.

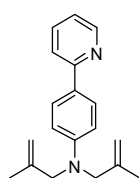

*N,N*-bis(2-methylallyl)-4-(pyridin-2-yl)aniline (**1zd**). (According to the general

procedure **H**). Brown oil (483.7 mg, 87%).  $^1\text{H}$  NMR (600 MHz,  $\text{CDCl}_3$ )  $\delta$  8.60 (d,  $J =$

4.3 Hz, 1H), 7.86 (d,  $J = 7.2$  Hz, 2H), 7.67 – 7.57 (m, 2H), 7.10 – 7.01 (m, 1H), 6.70 (d,  $J =$

7.5 Hz, 2H), 4.88 (s, 2H), 4.80 (s, 2H), 3.87 (s, 4H), 1.76 (s, 6H).  $^{13}\text{C}$  NMR (150

MHz,  $\text{CDCl}_3$ )  $\delta$  157.7, 149.7, 149.4, 140.4, 136.6, 127.7, 127.0, 120.6, 119.2, 112.1, 110.6, 56.3, 20.2. HRMS (ESI-TOF)  $m/z$ :  $[\text{M} + \text{H}]^+$  Calcd for  $\text{C}_{19}\text{H}_{23}\text{N}_2^+$  279.1856, Found: 279.1857.

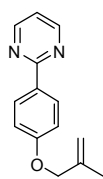

2-(4-((2-methylallyl)oxy)phenyl)pyrimidine (**1ze**). (According to the general procedure **A**).

White solid (415.8 mg, 92%, m.p. 39 - 40 °C).  $^1\text{H}$  NMR (400 MHz,  $\text{CDCl}_3$ )  $\delta$  8.77 – 8.66

(m, 2H), 8.43 – 8.35 (m, 2H), 7.10 – 7.04 (m, 1H), 7.04 – 6.97 (m, 2H), 5.11 (s, 1H), 5.00

(d,  $J = 0.4$  Hz, 1H), 4.49 (s, 2H), 1.83 (s, 3H).  $^{13}\text{C}$  NMR (100 MHz,  $\text{CDCl}_3$ )  $\delta$  164.6, 161.2,

157.2, 140.6, 130.4, 129.8, 118.4, 114.8, 113.0, 71.8, 19.5. HRMS (ESI-TOF)  $m/z$ :  $[\text{M} +$

$\text{H}]^+$  Calcd for  $\text{C}_{14}\text{H}_{15}\text{N}_2\text{O}^+$  227.1179, Found: 227.1180.

### 3. Experimental Section

#### (1) Tables of the Optimization of Reaction Conditions

**Table S1: Optimization of the reaction conditions of synthesis of 3.<sup>a</sup>**

Reaction scheme: 1a + Ph-C≡C-Ph (2a)  $\xrightarrow{[\text{RhCp}^*\text{Cl}_2]_2, \text{additive, oxidant, solvent, } 120\text{ }^\circ\text{C, } 12\text{ h}}$  3

| Entry     | Additive             | Oxidant                         | Solvent       | Yield [%] <sup>b</sup> |
|-----------|----------------------|---------------------------------|---------------|------------------------|
| 1         | PivOH                | AgOAc                           | THF           | 48                     |
| 2         | PivOH                | AgOAc                           | 1,4-Dioxane   | 26                     |
| 3         | PivOH                | AgOAc                           | DCE           | trace                  |
| 4         | PivOH                | AgOAc                           | MeOH          | ND <sup>c</sup>        |
| 5         | PivOH                | AgOAc                           | TFE           | ND <sup>c</sup>        |
| 6         | PivOH                | AgOAc                           | Acetone       | 13                     |
| 7         | PivOH                | AgOAc                           | PhMe          | 41                     |
| 8         | PivOH                | AgOAc                           | PhCl          | 50                     |
| 9         | PivOH                | AgOAc                           | MeCN          | ND <sup>c</sup>        |
| 10        | PivOH                | AgOAc                           | t-AmOH        | 68                     |
| 11        | PivOH                | Cu(OAc) <sub>2</sub>            | t-AmOH        | ND <sup>c</sup>        |
| 12        | PivOH                | AgF                             | t-AmOH        | 40                     |
| 13        | PivOH                | Ag <sub>2</sub> CO <sub>3</sub> | t-AmOH        | 30                     |
| 14        | PivOH                | AgOTFA                          | t-AmOH        | ND <sup>c</sup>        |
| 15        | PivOH                | Ag(II)O                         | t-AmOH        | 19                     |
| 16        | PivOH                | Ag <sub>2</sub> O               | t-AmOH        | 15                     |
| 17        | PivOH                | MeSO <sub>3</sub> Ag            | t-AmOH        | ND <sup>c</sup>        |
| 18        | PivOH                | AgOPiv                          | t-AmOH        | 60                     |
| 19        | Zn(OAc) <sub>2</sub> | AgOAc                           | t-AmOH        | 35                     |
| 20        | CsOAc                | AgOAc                           | t-AmOH        | 69                     |
| <b>21</b> | <b>CsOPiv</b>        | <b>AgOAc</b>                    | <b>t-AmOH</b> | <b>76</b>              |

|                 |          |       |        |                 |
|-----------------|----------|-------|--------|-----------------|
| 22              | LiOAc    | AgOAc | t-AmOH | 70              |
| 23              | NaOAc    | AgOAc | t-AmOH | 70              |
| 24              | HOAc     | AgOAc | t-AmOH | 65              |
| 25              | NaOPiv   | AgOAc | t-AmOH | 66              |
| 26              | MesCOOH  | AgOAc | t-AmOH | 68              |
| 27              | KOAc     | AgOAc | t-AmOH | 64              |
| 28              | 1-AdCOOH | AgOAc | t-AmOH | 63              |
| 29              | -        | AgOAc | t-AmOH | 60              |
| 30 <sup>d</sup> | PivOH    | AgOAc | t-AmOH | 40              |
| 31 <sup>e</sup> | CsOPiv   | AgOAc | t-AmOH | NR <sup>h</sup> |
| 32 <sup>f</sup> | CsOPiv   | AgOAc | t-AmOH | NR <sup>h</sup> |
| 33 <sup>g</sup> | CsOPiv   | AgOAc | t-AmOH | NR <sup>h</sup> |

<sup>a</sup>Reaction Conditions: **1a** (0.05 mmol), **2a** (0.065 mmol), [RhCp\*Cl<sub>2</sub>]<sub>2</sub> (5 mol%), additive (0.5 equiv), oxidant (2.3 equiv), solvent (1 mL), at 120 °C under Air for 12 h, <sup>b</sup>isolated yield, <sup>c</sup>no detected, <sup>d</sup>AgSbF<sub>6</sub> (20 mol%) was used, <sup>e</sup>[Cp\*IrCl<sub>2</sub>]<sub>2</sub> (5 mol%) was used, <sup>f</sup>[Ru(*p*-cymene)Cl<sub>2</sub>]<sub>2</sub> (5 mol%) was used, <sup>g</sup>[Cp\*Co(CO)I<sub>2</sub>] (5 mol%) was used, <sup>h</sup>no reaction.

**Table S2: Optimization of the reaction conditions of synthesis of **31**.**<sup>a</sup>

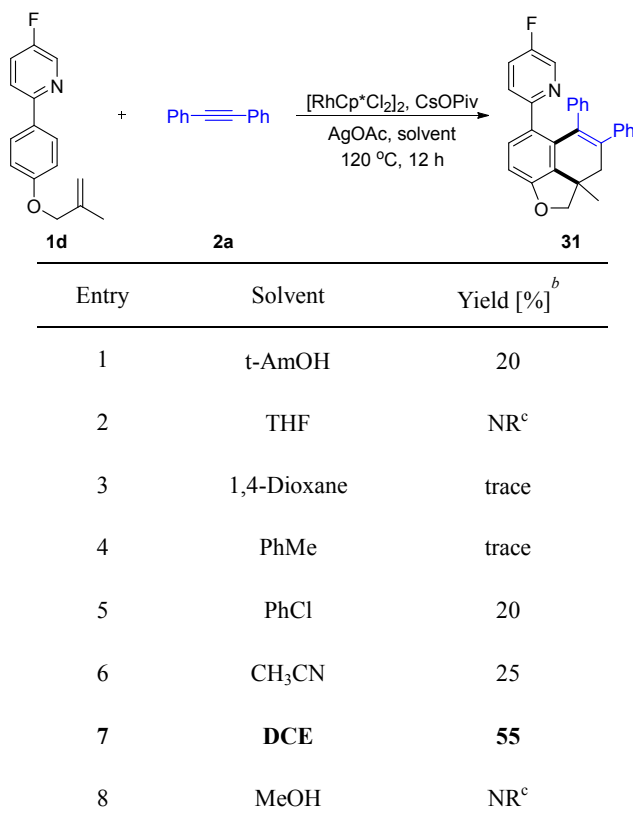

|    |                   |                 |
|----|-------------------|-----------------|
| 9  | tBuOMe            | 15              |
| 10 | PhCF <sub>3</sub> | 41              |
| 11 | HFIP              | NR <sup>c</sup> |

<sup>a</sup>Reaction Conditions: **1b** (0.05 mmol), **2a** (0.065 mmol), [RhCp\*Cl<sub>2</sub>]<sub>2</sub> (5 mol%), CsOPiv (0.5 equiv), AgOAc (2.3 equiv), solvent (1 mL), at 120 °C under Air for 12 h, <sup>b</sup>isolated yield, <sup>c</sup>no reaction.

**Table S3: Optimization of the reaction conditions of synthesis of 47.<sup>a</sup>**

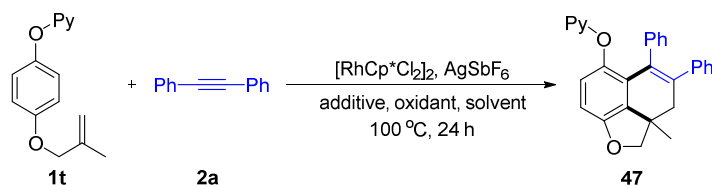

| Entry                | Additive                        | Oxidant      | Solvent         | Yield [%] <sup>b</sup> |
|----------------------|---------------------------------|--------------|-----------------|------------------------|
| 1                    | PivOH                           | AgOAc        | THF             | 24                     |
| 2                    | PivOH                           | AgOAc        | MeOH            | 44                     |
| 3                    | PivOH                           | AgOAc        | Acetone         | 23                     |
| 4                    | PivOH                           | AgOAc        | <i>t</i> -BuOMe | 29                     |
| 5                    | PivOH                           | AgOAc        | <i>t</i> -AmOH  | 40                     |
| 6                    | PivOH                           | AgOAc        | 1,4-Dioxane     | 37                     |
| 7                    | PivOH                           | AgOAc        | DME             | 27                     |
| 8                    | PivOH                           | AgOAc        | TFE             | 54                     |
| <b>9<sup>c</sup></b> | <b>PivOH</b>                    | <b>AgOAc</b> | <b>TFE</b>      | <b>73</b>              |
| 10 <sup>c</sup>      | HOAc                            | AgOAc        | TFE             | 60                     |
| 11 <sup>c</sup>      | CsOAc                           | AgOAc        | TFE             | 65                     |
| 12 <sup>c</sup>      | KOAc                            | AgOAc        | TFE             | 60                     |
| 13 <sup>c</sup>      | Zn(OAc) <sub>2</sub>            | AgOAc        | TFE             | 36                     |
| 14 <sup>c</sup>      | MesCOOH                         | AgOAc        | TFE             | 43                     |
| 15 <sup>c</sup>      | Na <sub>2</sub> CO <sub>3</sub> | AgOAc        | TFE             | 50                     |
| 16 <sup>c</sup>      | NaOPiv                          | AgOAc        | TFE             | 67                     |

<sup>a</sup>Reaction Conditions: **1t** (0.05 mmol), **2a** (0.06 mmol), [RhCp\*Cl<sub>2</sub>]<sub>2</sub> (5 mol%), AgSbF<sub>6</sub> (20 mol%), additive (1.0 equiv), oxidant (2.3 equiv), solvent (1 mL), at 100 °C under Air for 24 h, <sup>b</sup>isolated yield, <sup>c</sup>additive (2.0 equiv) was used.

**Table S4: Optimization of the reaction conditions of synthesis of 48.<sup>a</sup>**

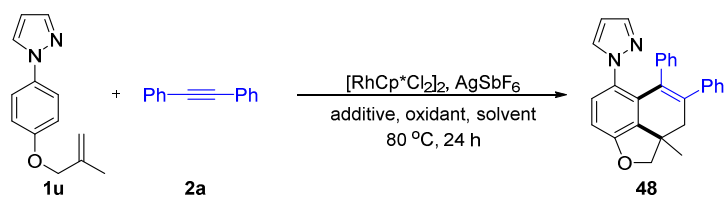

| Entry           | Additive             | Oxidant                         | Solvent            | Yield [%] <sup>b</sup> |
|-----------------|----------------------|---------------------------------|--------------------|------------------------|
| 1               | PivOH                | AgOAc                           | MeOH               | 40                     |
| 2               | PivOH                | AgOAc                           | 1,4-Dioxane        | 50                     |
| 3               | PivOH                | AgOAc                           | THF                | 43                     |
| 4               | PivOH                | AgOAc                           | HFIP               | ND <sup>c</sup>        |
| 5               | PivOH                | AgOAc                           | t-AmOH             | 30                     |
| 6               | PivOH                | AgOAc                           | TFE                | ND <sup>c</sup>        |
| 7               | PivOH                | Ag <sub>2</sub> CO <sub>3</sub> | 1,4-Dioxane        | 42                     |
| 8               | PivOH                | AgOTFA                          | 1,4-Dioxane        | ND <sup>c</sup>        |
| 9               | PivOH                | MeSO <sub>3</sub> Ag            | 1,4-Dioxane        | ND <sup>c</sup>        |
| 10              | PivOH                | Ag <sub>2</sub> O               | 1,4-Dioxane        | 36                     |
| 11              | PivOH                | AgOTf                           | 1,4-Dioxane        | ND <sup>c</sup>        |
| 12              | PivOH                | AgBF <sub>4</sub>               | 1,4-Dioxane        | ND <sup>c</sup>        |
| 13              | PivOH                | AgF                             | 1,4-Dioxane        | 21                     |
| 14              | PivOH                | Cu(OAc) <sub>2</sub>            | 1,4-Dioxane        | ND <sup>c</sup>        |
| 15 <sup>e</sup> | PivOH                | AgOAc                           | 1,4-Dioxane        | ND <sup>c</sup>        |
| 16              | Zn(OAc) <sub>2</sub> | AgOAc                           | 1,4-Dioxane        | 53                     |
| 17              | CsOAc                | AgOAc                           | 1,4-Dioxane        | NR <sup>d</sup>        |
| 18              | CsOPiv               | AgOAc                           | 1,4-Dioxane        | NR <sup>d</sup>        |
| <b>19</b>       | <b>NaOAc</b>         | <b>AgOAc</b>                    | <b>1,4-Dioxane</b> | <b>78</b>              |
| 20              | MesCOOH              | AgOAc                           | 1,4-Dioxane        | 53                     |
| 21              | LiOAc                | AgOAc                           | 1,4-Dioxane        | 59                     |
| 22              | 1-AdCOOH             | AgOAc                           | 1,4-Dioxane        | 49                     |
| 23              | HOAc                 | AgOAc                           | 1,4-Dioxane        | 57                     |

<sup>a</sup>Reaction Conditions: **1u** (0.05 mmol), **2a** (0.06 mmol), [RhCp\*Cl<sub>2</sub>]<sub>2</sub> (5 mol%), AgSbF<sub>6</sub> (20 mol%), additive (1.0 equiv), oxidant (2.3 equiv), solvent (1 mL), at 80 °C under Air for 24 h, <sup>b</sup>isolated yield, <sup>c</sup>no detected, <sup>d</sup>no reaction, <sup>e</sup>[IrCp\*Cl<sub>2</sub>]<sub>2</sub> (5 mol%) was used.

**Table S5: Optimization of the reaction conditions of synthesis of 49.<sup>a</sup>**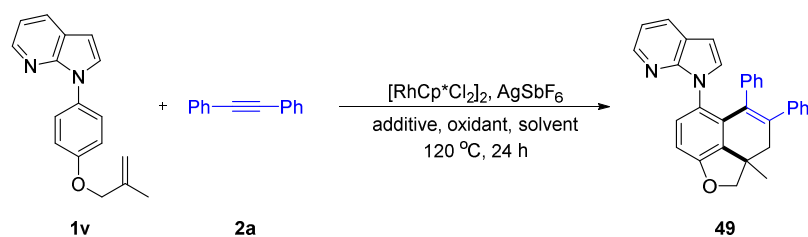

| Entry    | Additive     | Oxidant      | Solvent     | Yield [%] <sup>b</sup> |
|----------|--------------|--------------|-------------|------------------------|
| 1        | PivOH        | AgOAc        | DCE         | 56                     |
| 2        | PivOH        | AgOAc        | THF         | 62                     |
| <b>3</b> | <b>PivOH</b> | <b>AgOAc</b> | <b>MeOH</b> | <b>85</b>              |
| 4        | PivOH        | AgOAc        | MeCN        | ND <sup>c</sup>        |
| 5        | PivOH        | AgOAc        | PhMe        | 59                     |
| 6        | PivOH        | AgOAc        | 1,4-Dioxane | 42                     |
| 7        | PivOH        | AgOAc        | HFIP        | 39                     |
| 8        | PivOH        | AgOAc        | PhCl        | 68                     |

<sup>a</sup>Reaction Conditions: **1v** (0.05 mmol), **2a** (0.06 mmol), [RhCp\*Cl<sub>2</sub>]<sub>2</sub> (5 mol%), AgSbF<sub>6</sub> (20 mol%), additive (1.0 equiv), oxidant (2.3 equiv), solvent (1 mL), at 120 °C under Air for 24 h, <sup>b</sup>isolated yield, <sup>c</sup>no detected.

**Table S6: Optimization of the reaction conditions of synthesis of 50.<sup>a</sup>**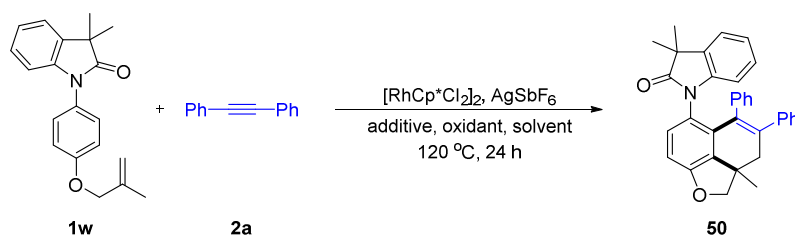

| Entry | Additive | Oxidant | Solvent     | Yield [%] <sup>b</sup> |
|-------|----------|---------|-------------|------------------------|
| 1     | PivOH    | AgOAc   | DCE         | trace                  |
| 2     | PivOH    | AgOAc   | MeCN        | NR <sup>c</sup>        |
| 3     | PivOH    | AgOAc   | THF         | 25                     |
| 4     | PivOH    | AgOAc   | MeOH        | NR <sup>c</sup>        |
| 5     | PivOH    | AgOAc   | 1,4-Dioxane | trace                  |
| 6     | PivOH    | AgOAc   | PhCl        | trace                  |
| 7     | PivOH    | AgOAc   | PhMe        | NR <sup>c</sup>        |
| 8     | PivOH    | AgOAc   | TFE         | trace                  |

|           |              |                                 |            |           |
|-----------|--------------|---------------------------------|------------|-----------|
| 9         | PivOH        | AgOAc                           | Ether      | 12        |
| <b>10</b> | <b>PivOH</b> | <b>AgF</b>                      | <b>THF</b> | <b>45</b> |
| 11        | PivOH        | AgF <sub>2</sub>                | THF        | 39        |
| 12        | PivOH        | Ag <sub>2</sub> CO <sub>3</sub> | THF        | 23        |
| 13        | PivOH        | Ag <sub>2</sub> O               | THF        | 35        |

<sup>a</sup>Reaction Conditions: **1w** (0.05 mmol), **2a** (0.06 mmol), [RhCp\*Cl<sub>2</sub>]<sub>2</sub> (5 mol%), AgSbF<sub>6</sub> (20 mol%), additive (1.0 equiv), oxidant (2.3 equiv), solvent (1 mL), at 120 °C under Air for 24 h, <sup>b</sup>isolated yield, <sup>c</sup>no reaction.

**Table S7: Optimization of the reaction conditions of synthesis of 51.<sup>a</sup>**

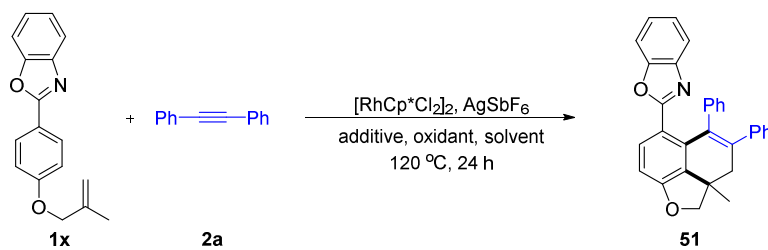

| Entry     | Additive             | Oxidant      | Solvent     | Yield [%] <sup>b</sup> |
|-----------|----------------------|--------------|-------------|------------------------|
| 1         | PivOH                | AgOAc        | DCE         | trace                  |
| 2         | PivOH                | AgOAc        | THF         | 15                     |
| 3         | PivOH                | AgOAc        | MeOH        | NR                     |
| 4         | PivOH                | AgOAc        | MeCN        | trace                  |
| 5         | PivOH                | AgOAc        | PhMe        | trace                  |
| 6         | PivOH                | AgOAc        | 1,4-Dioxane | 10                     |
| 7         | PivOH                | AgOAc        | HFIP        | NR                     |
| 8         | PivOH                | AgOAc        | PhCl        | 7                      |
| 9         | Zn(OAc) <sub>2</sub> | AgOAc        | THF         | ND                     |
| 10        | CsOAc                | AgOAc        | THF         | NR                     |
| 11        | CsOPiv               | AgOAc        | THF         | NR                     |
| 12        | LiOAc                | AgOAc        | THF         | 35                     |
| <b>13</b> | <b>NaOAc</b>         | <b>AgOAc</b> | <b>THF</b>  | <b>45</b>              |
| 14        | HOAc                 | AgOAc        | THF         | 39                     |
| 15        | KOAc                 | AgOAc        | THF         | 35                     |
| 16        | Zn(OTf) <sub>2</sub> | AgOAc        | THF         | NR                     |

<sup>a</sup>Reaction Conditions: **1x** (0.05 mmol), **2a** (0.06 mmol), [RhCp\*Cl<sub>2</sub>]<sub>2</sub> (5 mol%), AgSbF<sub>6</sub> (20 mol%), additive (1.0 equiv), oxidant (2.3 equiv), solvent (1 mL), at 120 °C under Air for 12 h, <sup>b</sup>isolated yield.

**Table S8: Optimization of the reaction conditions of synthesis of 53.<sup>a</sup>**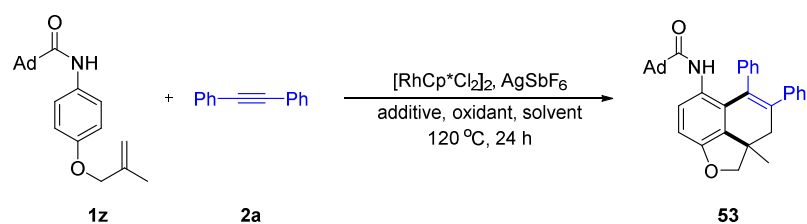

| Entry    | Additive             | Oxidant      | Solvent       | Yield [%] <sup>b</sup> |
|----------|----------------------|--------------|---------------|------------------------|
| 1        | PivOH                | AgOAc        | THF           | trace                  |
| 2        | PivOH                | AgOAc        | DCE           | trace                  |
| 3        | PivOH                | AgOAc        | MeOH          | trace                  |
| 4        | PivOH                | AgOAc        | 1,4-Dioxane   | trace                  |
| 5        | PivOH                | AgOAc        | PhMe          | 25                     |
| <b>6</b> | <b>PivOH</b>         | <b>AgOAc</b> | <b>t-AmOH</b> | <b>40</b>              |
| 7        | PivOH                | AgOAc        | TFE           | trace                  |
| 8        | PivOH                | AgOAc        | MeCN          | ND                     |
| 9        | Zn(OAc) <sub>2</sub> | AgOAc        | t-AmOH        | 30                     |
| 10       | CsOAc                | AgOAc        | t-AmOH        | NR                     |
| 11       | CsOPiv               | AgOAc        | t-AmOH        | NR                     |
| 12       | NaOAc                | AgOAc        | t-AmOH        | 25                     |
| 13       | LiOAc                | AgOAc        | t-AmOH        | 29                     |
| 14       | HOAc                 | AgOAc        | t-AmOH        | 15                     |

<sup>a</sup>Reaction Conditions: **1z** (0.05 mmol), **2a** (0.06 mmol), [RhCp\*Cl<sub>2</sub>]<sub>2</sub> (5 mol%), AgSbF<sub>6</sub> (20 mol%), additive (1.0 equiv), oxidant (2.3 equiv), solvent (1 mL), at 120 °C under Air for 12 h, <sup>b</sup>isolated yield.

**Table S9: Optimization of the reaction conditions of synthesis of 54.<sup>a</sup>**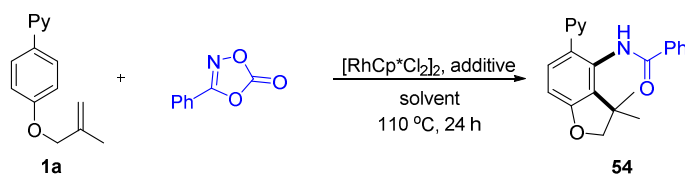

| Entry | Additive 1 | Additive 2 | Solvent     | Yield [%] <sup>b</sup> |
|-------|------------|------------|-------------|------------------------|
| 1     | CsOPiv     | AgOAc      | THF         | ND <sup>c</sup>        |
| 2     | CsOPiv     | AgOAc      | 1,4-Dioxane | ND <sup>c</sup>        |
| 3     | CsOPiv     | AgOAc      | PhMe        | ND <sup>c</sup>        |



|                 |                      |       |                   |                 |
|-----------------|----------------------|-------|-------------------|-----------------|
| 4               | CsOPiv               | AgOAc | PhCl              | ND <sup>c</sup> |
| 5               | CsOPiv               | AgOAc | MeCN              | ND <sup>c</sup> |
| 6               | CsOPiv               | AgOAc | DCE               | ND <sup>c</sup> |
| 7               | CsOPiv               | AgOAc | MeOH              | ND <sup>c</sup> |
| 8               | CsOPiv               | AgOAc | tBuOMe            | ND <sup>c</sup> |
| 9               | CsOPiv               | AgOAc | PhCF <sub>3</sub> | ND <sup>c</sup> |
| 10              | CsOPiv               | AgOAc | HFIP              | trace           |
| 11              | CsOPiv               | AgOAc | t-AmOH            | ND <sup>c</sup> |
| 12 <sup>d</sup> | Zn(OAc) <sub>2</sub> | -     | HFIP              | 40              |
| 13 <sup>d</sup> | CsOAc                | -     | HFIP              | 65              |
| 14 <sup>d</sup> | NaOAc                | -     | HFIP              | trace           |
| 15 <sup>d</sup> | CsOPiv               | -     | HFIP              | 30              |
| 16 <sup>d</sup> | HOAc                 | -     | HFIP              | 45              |
| 17 <sup>d</sup> | <b>PivOH</b>         | -     | <b>HFIP</b>       | <b>83</b>       |
| 18 <sup>d</sup> | PivOH                | -     | TFE               | ND <sup>c</sup> |
| 19 <sup>d</sup> | PivOH                | -     | DCE               | ND <sup>c</sup> |
| 20 <sup>d</sup> | PivOH                | -     | THF               | ND <sup>c</sup> |
| 21 <sup>d</sup> | PivOH                | -     | MeOH              | ND <sup>c</sup> |
| 22 <sup>d</sup> | PivOH                | -     | t-AmOH            | trace           |
| 23 <sup>d</sup> | PivOH                | -     | PhMe              | ND <sup>c</sup> |
| 24 <sup>d</sup> | PivOH                | -     | MeCN              | 34              |
| 25 <sup>d</sup> | PivOH                | -     | PhCF <sub>3</sub> | 20              |

<sup>a</sup>Reaction Conditions: **1a** (0.05 mmol), 3-phenyl-1,4,2-dioxazol-5-one (0.065 mmol), [RhCp\*Cl<sub>2</sub>]<sub>2</sub> (5 mol%), additive **1** (2.0 equiv), additive **2** (1.0 equiv), solvent (1 mL), at 110 °C under Air for 24 h, <sup>b</sup>isolated yield, <sup>c</sup>no detected, <sup>d</sup>AgSbF<sub>6</sub> (20 mol%) was used, at 110 °C under Air for 36 h.

**Table S10: Optimization of the reaction conditions of synthesis of **63**.**<sup>a</sup>

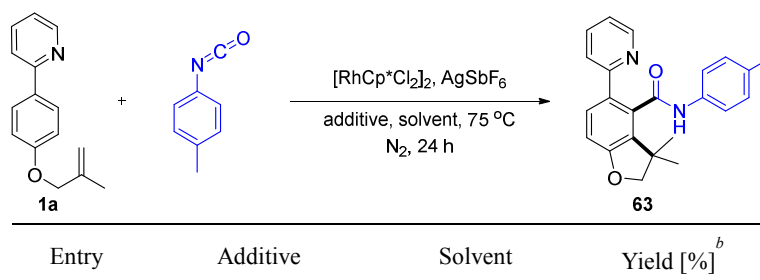

|           |                      |                   |                 |
|-----------|----------------------|-------------------|-----------------|
| 1         | PivOH                | DCE               | ND <sup>c</sup> |
| 2         | NaOAc                | DCE               | ND <sup>c</sup> |
| 3         | CsOAc                | DCE               | ND <sup>c</sup> |
| 4         | CsOPiv               | DCE               | ND <sup>c</sup> |
| 5         | Zn(OAc) <sub>2</sub> | DCE               | ND <sup>c</sup> |
| 6         | HOAc                 | DCE               | ND <sup>c</sup> |
| 7         | AgOAc                | DCE               | 45              |
| 8         | LiOAc                | DCE               | ND <sup>c</sup> |
| 9         | -                    | DCE               | ND <sup>c</sup> |
| <b>10</b> | <b>AgOAc</b>         | <b>DCM</b>        | <b>56</b>       |
| 11        | AgOAc                | PhCl              | 45              |
| 12        | AgOAc                | MeCN              | NR <sup>d</sup> |
| 13        | AgOAc                | PhMe              | 35              |
| 14        | AgOAc                | PhCF <sub>3</sub> | 40              |
| 15        | AgOAc                | THF               | 20              |

<sup>a</sup>Reaction Conditions: **1a** (0.05 mmol), 1-isocyanato-4-methylbenzene (0.06 mmol), [RhCp\*Cl<sub>2</sub>]<sub>2</sub> (5 mol%), additive (1.0 equiv), solvent (1 mL), at 75 °C under N<sub>2</sub> for 24 h, <sup>b</sup>isolated yield, <sup>c</sup>no detected, <sup>d</sup>no reaction.

**(2) General procedures for the synthesis of products 3 - 67.**

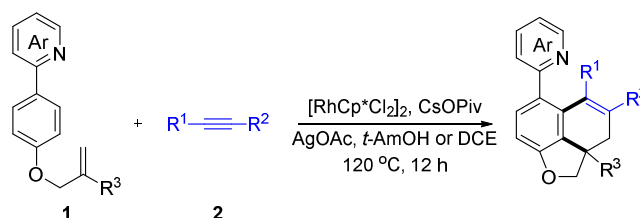

**Conditions 1.** A mixture of arenes **1** (0.2 mmol, 1.0 equiv), alkynes **2** (0.26 mmol, 1.3 equiv), [RhCp\*Cl<sub>2</sub>]<sub>2</sub> (6.2 mg, 5 mol%), CsOPiv (24.3 mg, 0.1 mmol, 0.5 equiv) and AgOAc (76.8 mg, 0.46 mmol, 2.3 equiv) were weighted in a pressure tube equipped with a stir bar. *t*-AmOH or DCE (2 mL) was added and the mixture was stirred at 120 °C for 12 h under air atmosphere. Afterwards, the mixture was evaporated under reduced pressure and the residue was adsorbed onto small amounts of silica. The purification was performed by flash column chromatography (EtOAc/petroleum ether = 1:10) on silica gel.

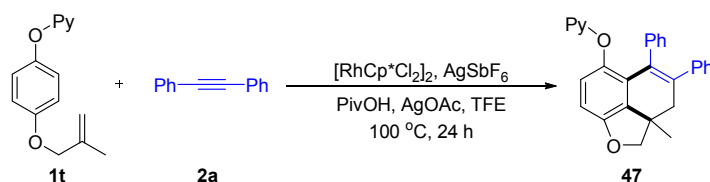

**Conditions 2:** A mixture of arene **1t** (48.2 mg, 0.2 mmol, 1.0 equiv), alkyne **2a** (40.1 mg, 0.24 mmol, 1.2 equiv),  $[\text{RhCp}^*\text{Cl}_2]_2$  (6.2 mg, 5 mol%),  $\text{AgSbF}_6$  (13.7 mg, 20 mol%), PivOH (20 mg, 0.2 mmol, 1.0 equiv) and  $\text{AgOAc}$  (76.8 mg, 0.46 mmol, 2.3 equiv) were weighted in a pressure tube equipped with a stir bar. TFE (2 mL) was added and the mixture was stirred at 100 °C for 24 h under air atmosphere. Afterwards, the mixture was evaporated under reduced pressure and the residue was adsorbed onto small amounts of silica. The purification was performed by flash column chromatography (EtOAc/petroleum ether = 1:5) on silica gel.

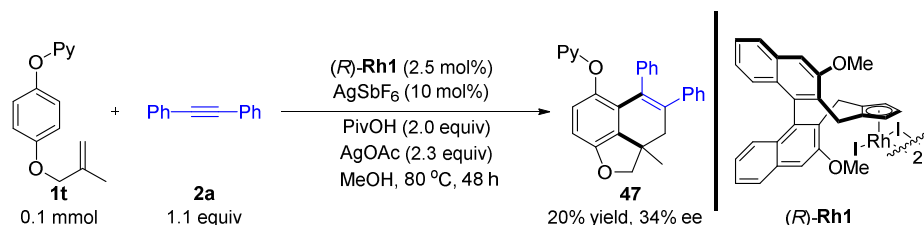

**Enantioselective Synthesis of 47.** A mixture of arene **1t** (24.1 mg, 0.1 mmol, 1.0 equiv), **2a** (20.0 mg, 0.12 mmol, 1.2 equiv),  $(R)\text{-Rh1}$  (3.4 mg, 2.5 mol%),  $\text{AgSbF}_6$  (3.4 mg, 10 mol%), PivOH (20 mg, 0.2 mmol, 2.0 equiv) and  $\text{AgOAc}$  (38.4 mg, 0.23 mmol, 2.3 equiv) were weighted in a pressure tube equipped with a stir bar. MeOH (2 mL) was added and the mixture was stirred at 80 °C for 48 h under air atmosphere. Afterwards, the mixture was evaporated under reduced pressure and the residue was purified by column chromatography (EtOAc/petroleum ether = 1:5) on silica gel affording **47** (8.3 mg, 20% yield). Enantiomeric excess was determined by HPLC with a Daicel Chiralpak OD-H, n-hexane/2-propanol = 98/2,  $v = 1.0 \text{ mL} \cdot \text{min}^{-1}$ ,  $\lambda = 254 \text{ nm}$ ,  $t$  (minor) = 4.9 min,  $t$  (major) = 5.5 min, 34% ee;  $[\alpha]_D^{15.0} = -20.74$  ( $c = 0.5$ ,  $\text{CHCl}_3$ ).

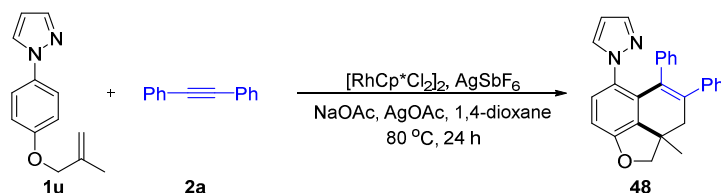

**Conditions 3:** A mixture of arene **1u** (42.8 mg, 0.2 mmol, 1.0 equiv), alkyne **2a** (40.1 mg, 0.24 mmol, 1.2 equiv),  $[\text{RhCp}^*\text{Cl}_2]_2$  (6.2 mg, 5 mol%),  $\text{AgSbF}_6$  (13.7 mg, 20 mol%), NaOAc (16.4 mg, 0.2 mmol, 1.0 equiv) and  $\text{AgOAc}$  (76.8 mg, 0.46 mmol, 2.3 equiv) were weighted in a pressure tube equipped with a stir bar. 1,4-Dioxane (2 mL) was added and the mixture was stirred at 80 °C for 24 h under air atmosphere. Afterwards, the mixture was evaporated under reduced pressure and the residue was adsorbed onto small amounts of silica. The purification was performed by flash column chromatography (EtOAc/petroleum ether = 1:10) on silica gel.

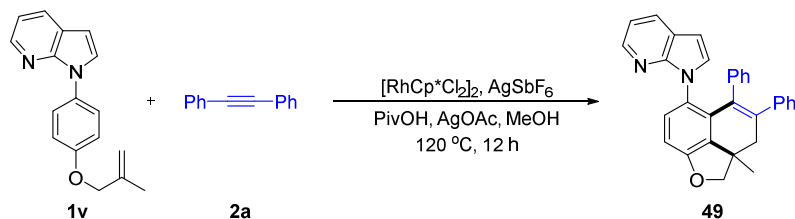

**Conditions 4:** A mixture of arene **1v** (52.8 mg, 0.2 mmol, 1.0 equiv), alkyne **2a** (40.1 mg, 0.24 mmol, 1.2 equiv),  $[\text{RhCp}^*\text{Cl}_2]_2$  (6.2 mg, 5 mol%),  $\text{AgSbF}_6$  (13.7 mg, 20 mol%), PivOH (20 mg, 0.2 mmol, 1.0

equiv) and AgOAc (76.8 mg, 0.46 mmol, 2.3 equiv) were weighted in a pressure tube equipped with a stir bar. MeOH (2 mL) was added and the mixture was stirred at 120 °C for 12 h under air atmosphere. Afterwards, the mixture was evaporated under reduced pressure and the residue was adsorbed onto small amounts of silica. The purification was performed by flash column chromatography (EtOAc/petroleum ether = 1:5) on silica gel.

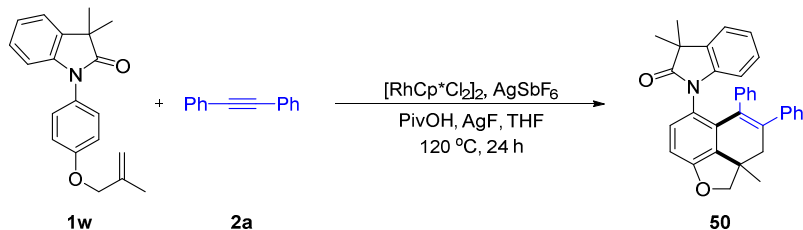

**Conditions 5:** A mixture of arene **1w** (61.4 mg, 0.2 mmol, 1.0 equiv), alkyne **2a** (40.1 mg, 0.24 mmol, 1.2 equiv),  $[\text{RhCp}^*\text{Cl}_2]_2$  (6.2 mg, 5 mol%),  $\text{AgSbF}_6$  (13.7 mg, 20 mol%), PivOH (20 mg, 0.2 mmol, 1.0 equiv) and AgF (58.4 mg, 0.46 mmol, 2.3 equiv) were weighted in a pressure tube equipped with a stir bar. THF (2 mL) was added and the mixture was stirred at 120 °C for 24 h under air atmosphere. Afterwards, the mixture was evaporated under reduced pressure and the residue was adsorbed onto small amounts of silica. The purification was performed by flash column chromatography (EtOAc/petroleum ether = 1:10) on silica gel.

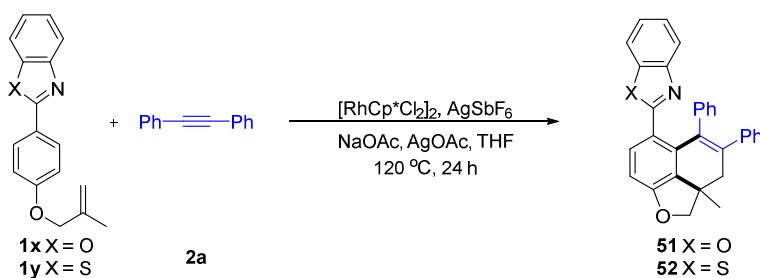

**Conditions 6:** A mixture of arene **1x** or **1y** (0.2 mmol, 1.0 equiv), alkyne **2a** (40.1 mg, 0.24 mmol, 1.2 equiv),  $[\text{RhCp}^*\text{Cl}_2]_2$  (6.2 mg, 5 mol%),  $\text{AgSbF}_6$  (13.7 mg, 20 mol%), NaOAc (16.4 mg, 0.2 mmol, 1.0 equiv) and AgOAc (76.8 mg, 0.46 mmol, 2.3 equiv) were weighted in a pressure tube equipped with a stir bar. THF (2 mL) was added and the mixture was stirred at 120 °C for 24 h under air atmosphere. Afterwards, the mixture was evaporated under reduced pressure and the residue was adsorbed onto small amounts of silica. The purification was performed by flash column chromatography (EtOAc/petroleum ether = 1:10) on silica gel.

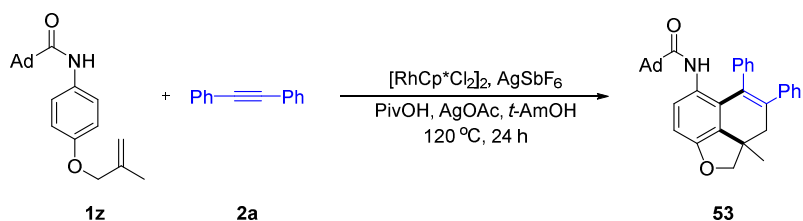

**Conditions 7:** A mixture of arene **1z** (65.0 mg, 0.2 mmol, 1.0 equiv), alkyne **2a** (42.7 mg, 0.24 mmol, 1.2 equiv),  $[\text{RhCp}^*\text{Cl}_2]_2$  (6.2 mg, 5 mol%),  $\text{AgSbF}_6$  (13.7 mg, 20 mol%), PivOH (20 mg, 0.2 mmol, 1.0 equiv) and AgOAc (76.8 mg, 0.46 mmol, 2.3 equiv) were weighted in a pressure tube equipped with a stir bar. *t*-AmOH (2 mL) was added and the mixture was stirred at 120 °C for 24 h under air atmosphere.

Afterwards, the mixture was evaporated under reduced pressure and the residue was adsorbed onto small amounts of silica. The purification was performed by flash column chromatography (EtOAc/petroleum ether = 1:10) on silica gel.

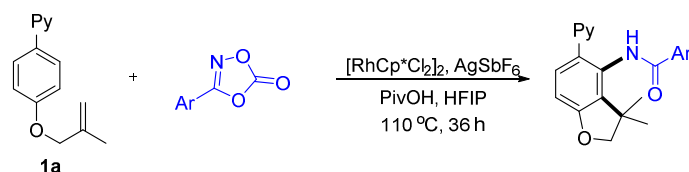

**Conditions 8:** A mixture of arene **1a** (45.2 mg, 0.2 mmol, 1.0 equiv), dioxazolones (0.26 mmol, 1.3 equiv),  $[\text{RhCp}^*\text{Cl}_2]_2$  (6.2 mg, 5 mol%),  $\text{AgSbF}_6$  (13.7 mg, 20 mol%) and PivOH (40 mg, 0.4 mmol, 2.0 equiv) were weighed in a pressure tube equipped with a stir bar. HFIP (2 mL) was added and the mixture was stirred at 110 °C for 36 h under air atmosphere. Afterwards, the mixture was evaporated under reduced pressure and the residue was adsorbed onto small amounts of silica. The purification was performed by flash column chromatography (EtOAc/petroleum ether = 1:1) on silica gel.

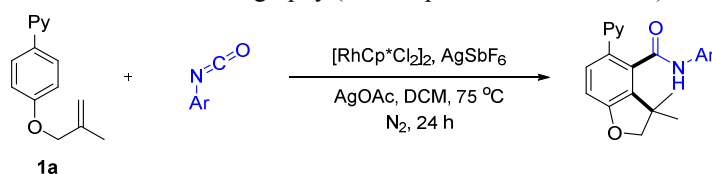

**Conditions 9:** A mixture of arene **1a** (45.2 mg, 0.2 mmol, 1.0 equiv), isocyanates (0.24 mmol, 1.2 equiv),  $[\text{RhCp}^*\text{Cl}_2]_2$  (6.2 mg, 5 mol%),  $\text{AgSbF}_6$  (13.7 mg, 20 mol%) and  $\text{AgOAc}$  (33.4 mg, 0.2 mmol, 1.0 equiv) were weighed in a pressure tube equipped with a stir bar. DCM (2 mL) was added and the mixture was stirred at 75 °C for 24 h under  $\text{N}_2$  atmosphere. Afterwards, the mixture was evaporated under reduced pressure and the residue was adsorbed onto small amounts of silica. The purification was performed by flash column chromatography (EtOAc/petroleum ether = 1:2) on silica gel.

### (3) Diversification of the Products

#### (a) Scale-up Synthesis

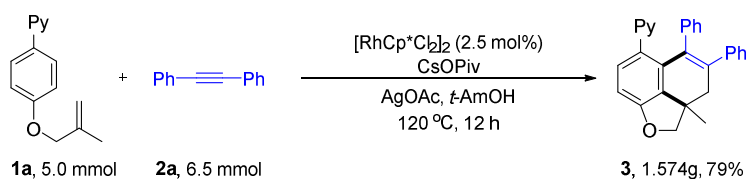

A mixture of arene **1a** (1.125 g, 5.0 mmol, 1.0 equiv), alkyne **2a** (1.157 g, 6.5 mmol, 1.3 equiv),  $[\text{RhCp}^*\text{Cl}_2]_2$  (77.3 mg, 2.5 mol%),  $\text{CsOPiv}$  (607.5 mg, 2.5 mmol, 0.5 equiv) and  $\text{AgOAc}$  (1.919 g, 11.5 mmol, 2.3 equiv) were weighed in a pressure tube equipped with a stir bar. *t*-AmOH (50 mL) was added and the mixture was stirred at 120 °C for 12 h under air atmosphere. Afterwards, it was evaporated under reduced pressure, and the residue was purified by silica gel chromatography using EtOAc/petroleum ether = 1:10 to afford **3** (1.574 g, 79%).

#### (b) Synthetic Transformation

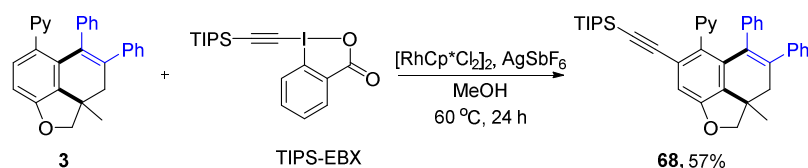

A mixture of arene **3** (40.1 mg, 0.10 mmol, 1.0 equiv), 1-(triisopropylsilyl)ethynyl-1,2-benziodoxol-3(1*H*)-one<sup>8</sup> (TIPS-EBX) (51.4 mg, 0.12 mmol, 1.2 equiv), [RhCp\*Cl<sub>2</sub>]<sub>2</sub> (3.1 mg, 5.0 mol%) and AgSbF<sub>6</sub> (6.9 mg, 20.0 mol%) were weighted in a pressure tube equipped with a stir bar. MeOH (2 mL) was added and the mixture was stirred at 60 °C for 24 h under air atmosphere. Afterwards, it was evaporated under reduced pressure, and the residue was purified by silica gel chromatography using EtOAc/petroleum ether = 1:3 to afford **68** (33.1 mg, 57%).

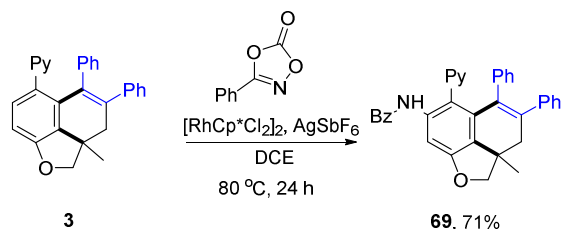

A mixture of arene **3** (40.1 mg, 0.10 mmol, 1.0 equiv), 3-phenyl-1,4,2-dioxazol-5-one (19.6 mg, 0.12 mmol, 1.2 equiv), [RhCp\*Cl<sub>2</sub>]<sub>2</sub> (3.1 mg, 5.0 mol%) and AgSbF<sub>6</sub> (6.9 mg, 20.0 mol%) were weighted in a pressure tube equipped with a stir bar. DCE (2 mL) was added and the mixture was stirred at 80 °C for 24 h under air atmosphere. Afterwards, it was evaporated under reduced pressure, and the residue was purified by silica gel chromatography using EtOAc/petroleum ether = 1:2 to afford **69** (36.9 mg, 71%).

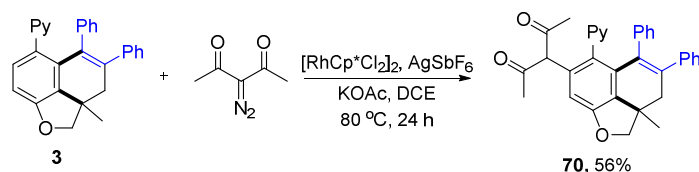

A mixture of arene **3** (40.1 mg, 0.10 mmol, 1.0 equiv), 3-diazopentane-2,4-dione<sup>9</sup> (18.9 mg, 0.15 mmol, 1.5 equiv), [RhCp\*Cl<sub>2</sub>]<sub>2</sub> (3.1 mg, 5.0 mol%), AgSbF<sub>6</sub> (6.9 mg, 20.0 mol%) and KOAc (4.9 mg, 0.05 mmol, 0.5 equiv) were weighted in a pressure tube equipped with a stir bar. DCE (2 mL) was added and the mixture was stirred at 80 °C for 24 h under N<sub>2</sub> atmosphere. Afterwards, it was evaporated under reduced pressure, and the residue was purified by silica gel chromatography using EtOAc/petroleum ether = 1:2 to afford **70** (27.9 mg, 56%).

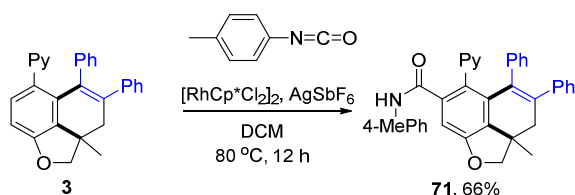

A mixture of arene **3** (40.1 mg, 0.10 mmol, 1.0 equiv), 1-isocyanato-4-methylbenzene (20.0 mg, 0.15 mmol, 1.5 equiv), [RhCp\*Cl<sub>2</sub>]<sub>2</sub> (3.1 mg, 5.0 mol%) and AgSbF<sub>6</sub> (6.9 mg, 20.0 mol%) were weighted in a pressure tube equipped with a stir bar. DCM (2 mL) was added and the mixture was stirred at 80 °C for 12 h under N<sub>2</sub> atmosphere. Afterwards, it was evaporated under reduced pressure, and the residue was purified by silica gel chromatography using EtOAc/petroleum ether = 1:2 to afford **71** (35.5 mg, 66%).

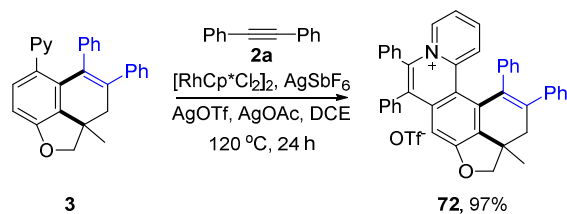

A mixture of arene **3** (40.1 mg, 0.10 mmol, 1.0 equiv), 1,2-diphenylethyne (19.6 mg, 0.11 mmol, 1.1 equiv), [RhCp\*Cl<sub>2</sub>]<sub>2</sub> (3.1 mg, 5.0 mol%), AgSbF<sub>6</sub> (6.9 mg, 20.0 mol%), AgOTf (56.5 mg, 0.22 mmol, 2.2 equiv), AgOAc (25.0 mg, 0.15 mmol, 1.5 equiv) were weighted in a pressure tube equipped with a stir bar. MeOH (2 mL) was added and the mixture was stirred at 120 °C for 24 h under N<sub>2</sub> atmosphere. Afterwards, it was evaporated under reduced pressure, and the residue was purified by silica gel chromatography using MeOH/DCM = 1:20 to afford **72** (70.5 mg, 97%).

#### (4) Mechanistic Studies

(a) H/D Exchange experiment

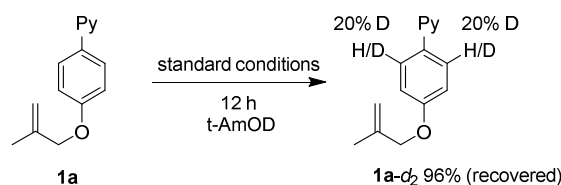

**Procedures for H/D Exchange Studies in the absence of 2a:** A mixture of arene **1a** (22.5 mg, 0.1 mmol, 1.0 equiv), [RhCp\*Cl<sub>2</sub>]<sub>2</sub> (3.1 mg, 5 mol%), CsOPiv (12.2 mg, 0.05 mmol, 0.5 equiv) and AgOAc (38.4 mg, 0.23 mmol, 2.3 equiv) were weighted in a pressure tube equipped with a stir bar. *t*-AmOD (2 mL) was added and the mixture was stirred at 120 °C for 12 h under air atmosphere. Afterwards, the mixture was evaporated under reduced pressure and the residue was adsorbed onto small amounts of silica. The purification was performed by flash column chromatography (EtOAc/petroleum ether = 1:10) on silica gel. <sup>1</sup>H NMR analysis indicated 20% deuteration at the *ortho*-position of the phenyl ring.

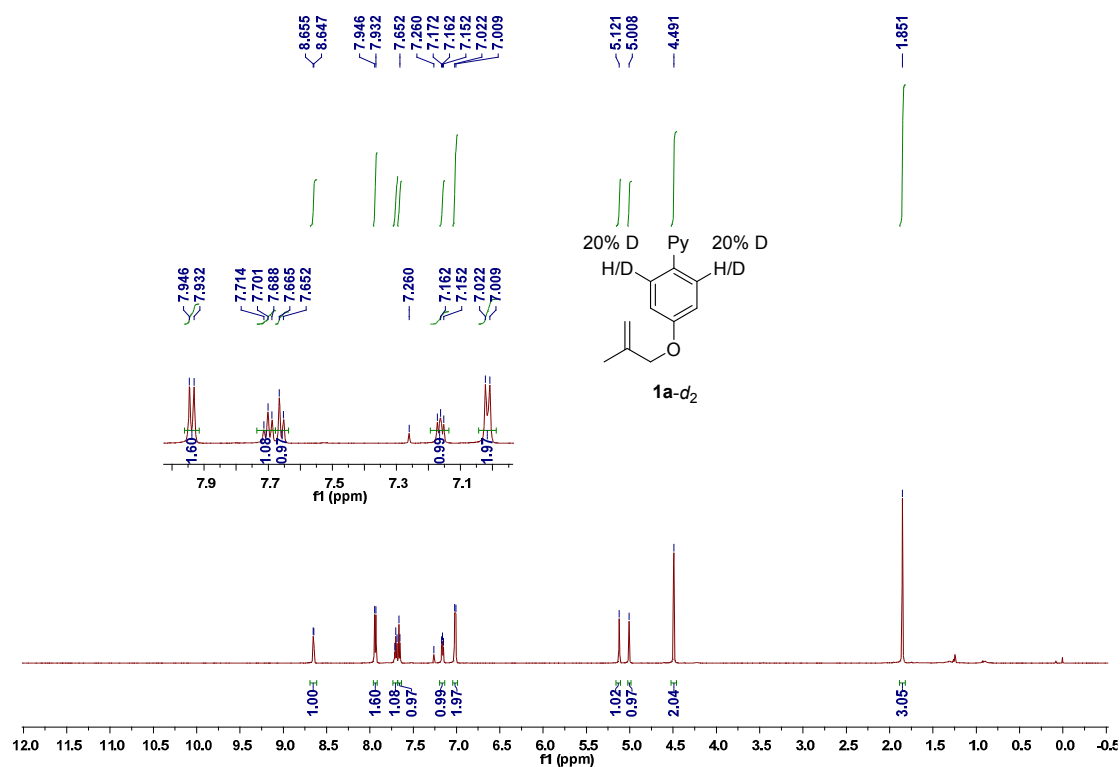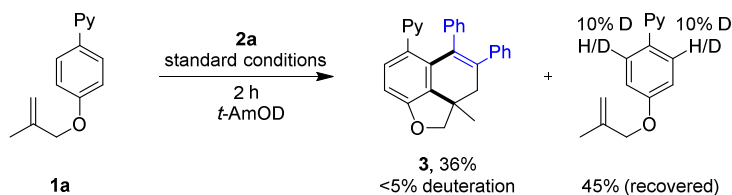

**Procedures for H/D Exchange Studies in the Presence of 2a:** A mixture of arene **1a** (22.5 mg, 0.1 mmol, 1.0 equiv), alkyne **2a** (23.1 mg, 0.13 mmol, 1.3 equiv), [RhCp\*Cl<sub>2</sub>]<sub>2</sub> (3.1 mg, 5 mol%), CsOPiv (12.2 mg, 0.05 mmol, 0.5 equiv) and AgOAc (38.4 mg, 0.23 mmol, 2.3 equiv) were weighted in a pressure tube equipped with a stir bar. *t*-AmOD (2 mL) was added and the mixture was stirred at 120 °C for 2 h under air atmosphere. Afterwards, the mixture was evaporated under reduced pressure and the residue was adsorbed onto small amounts of silica. The purification was performed by flash column chromatography (EtOAc/petroleum ether = 1:10) on silica gel. The ratio was determined by <sup>1</sup>H NMR.



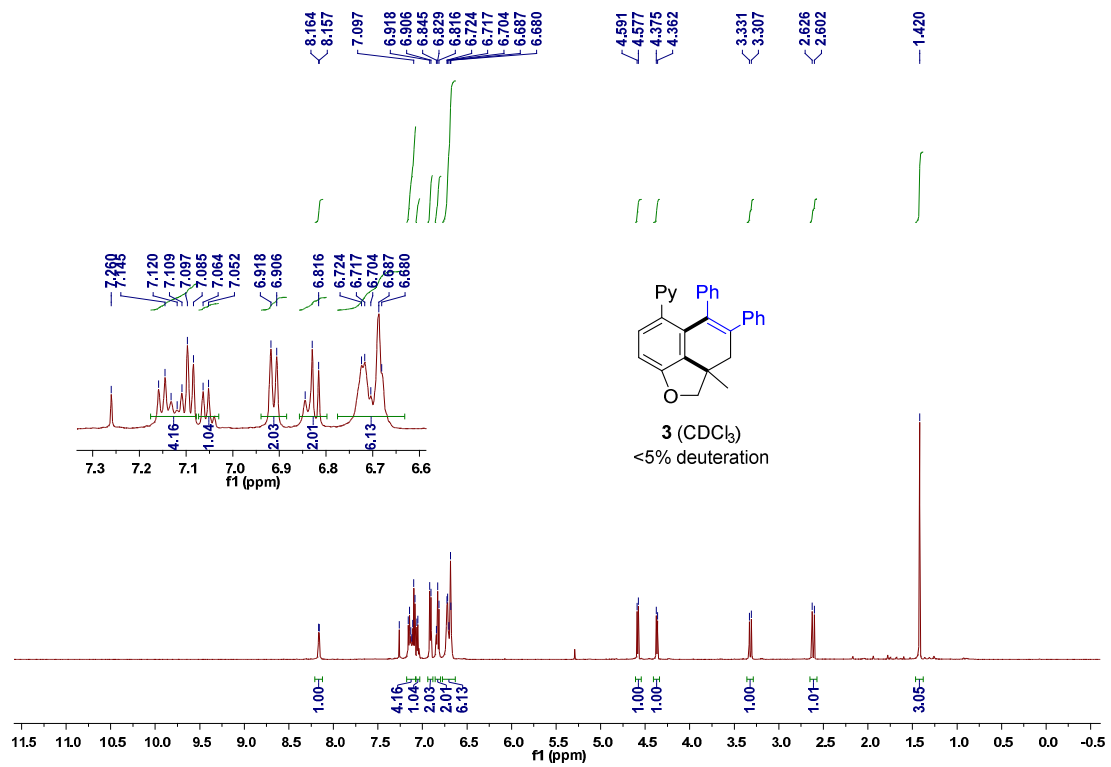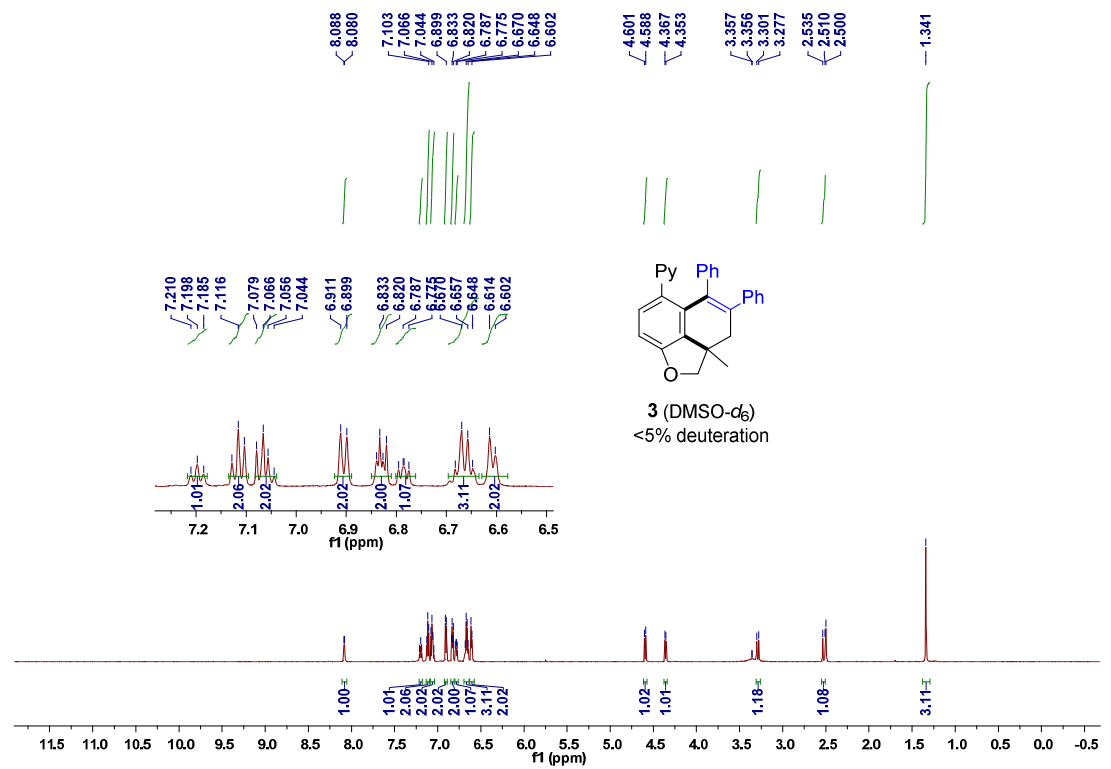

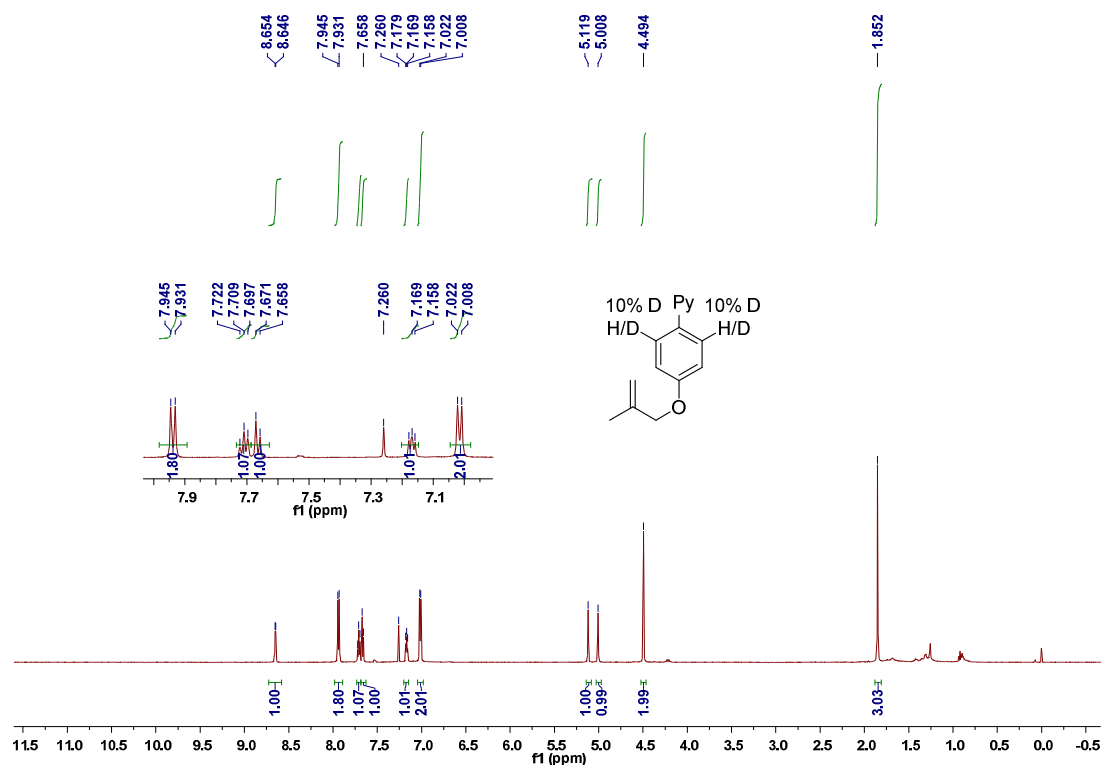

## b) Synthesis of intermediate A

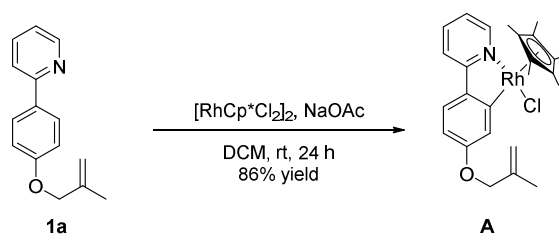

A mixture of iminopyridinium ylide **1a** (67.5 mg, 0.3 mmol, 1.0 equiv),  $[\text{Cp}^*\text{RhCl}_2]_2$  (81.6 mg, 0.132 mmol, 0.44 equiv), NaOAc (73.8 mg, 0.9 mmol, 3.0 equiv) and DCM (4 mL) were charged into a reaction tube. The reaction mixture was stirred under air at r.t. for 24 h. After the solvent was removed under reduced pressure, the residue was purified by silica gel chromatography using EtOAc/petroleum ether = 1:1 to provide the complex **A** and was isolated as an orange-red solid (112.9 mg, 86%). Structure of this compound was verified by X-ray crystallographic analysis after recrystallization from  $\text{CH}_2\text{Cl}_2$  at room temperature.

**A** Orange-red solid (112.9 mg, 86%, m.p. 171 - 172 °C).  $^1\text{H}$  NMR (600 MHz,  $\text{CDCl}_3$ )  $\delta$  8.64 (d,  $J = 5.5$  Hz, 1H), 7.65 – 7.58 (m, 2H), 7.51 (d,  $J = 8.5$  Hz, 1H), 7.35 (d,  $J = 1.8$  Hz, 1H), 7.02 (t,  $J = 6.1$  Hz, 1H), 6.63 (dd,  $J = 8.4, 1.9$  Hz, 1H), 5.14 (s, 1H), 5.01 (s, 1H), 4.55 (q,  $J = 12.7$  Hz, 2H), 1.86 (s, 3H), 1.61 (s, 15H).  $^{13}\text{C}$  NMR (150 MHz,  $\text{CDCl}_3$ )  $\delta$  180.8 (d,  $J = 32.2$  Hz, 1C), 165.2, 159.9, 151.1, 141.5, 137.02, 136.96, 124.5, 121.7, 120.9, 118.4, 112.6, 110.4, 96.0 (d,  $J = 5.9$  Hz, 1C), 71.6, 19.6, 9.3. HRMS (ESI-TOF)  $m/z$ :  $[\text{M} - \text{Cl}]^+$  Calcd for  $\text{C}_{25}\text{H}_{29}\text{NORh}^+$  462.1304, Found: 462.1303.

## c) Catalytic reaction of intermediate A

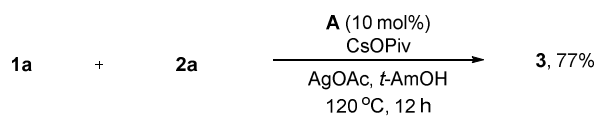

A mixture of **1a** (22.5 mg, 0.1 mmol, 1.0 equiv), **2a** (23.1 mg, 0.13 mmol, 1.3 equiv), **A** (4.9 mg, 10 mol%), CsOPiv (12.2 mg, 0.05 mmol, 0.5 equiv) and AgOAc (38.4 mg, 0.23 mmol, 2.3 equiv) were weighted in a pressure tube equipped with a stir bar. *t*-AmOH (2 mL) was added and the mixture was stirred at 120 °C for 12 h under air atmosphere. After the solvent was removed under reduced pressure, the residue was purified by silica gel chromatography using EtOAc/petroleum ether = 1:10 to afford **3** in 77% yield.

d) Stoichiometric reaction of intermediate **A**

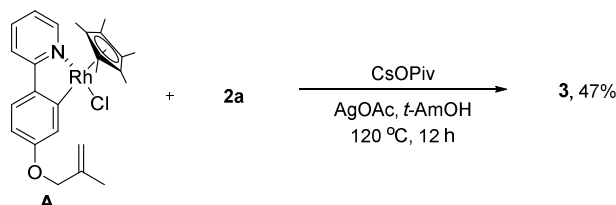

A mixture of **A** (24.9 mg, 0.05 mmol, 1.0 equiv), **2a** (11.6 mg, 0.065 mmol, 1.3 equiv), CsOPiv (6.1 mg, 0.5 equiv) and AgOAc (19.2 mg, 0.115 mmol, 2.3 equiv) were weighted in a pressure tube equipped with a stir bar. *t*-AmOH (1 mL) was added and the mixture was stirred at 120 °C for 12 h under air atmosphere. After the solvent was removed under reduced pressure, the residue was purified by silica gel chromatography using EtOAc/petroleum ether = 1:10 to afford **3** in 47% (9.4 mg) yield.

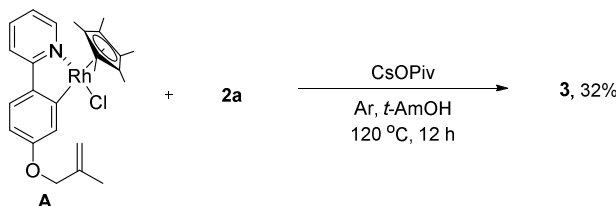

A mixture of **A** (24.9 mg, 0.05 mmol, 1.0 equiv), **2a** (11.6 mg, 0.065 mmol, 1.3 equiv) and CsOPiv (6.1 mg, 0.5 equiv) were weighted in a pressure tube equipped with a stir bar. *t*-AmOH (1 mL) was added and the mixture was stirred at 120 °C for 12 h under Ar atmosphere. After the solvent was removed under reduced pressure, the residue was purified by silica gel chromatography using EtOAc/petroleum ether = 1:10 to afford **3** in 32% (6.4 mg) yield.

e) Control experiment

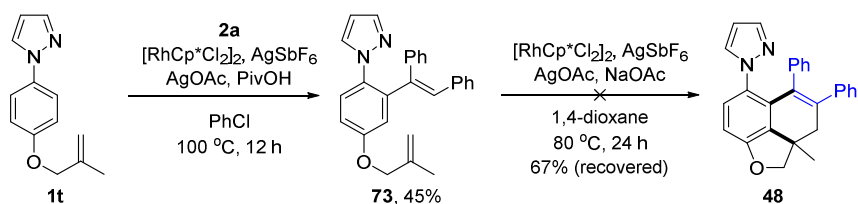

**Step1:** A mixture of arene **1t** (85.6 mg, 0.4 mmol, 1.0 equiv), alkyne **2a** (85.4 mg, 0.48 mmol, 1.2 equiv),  $[\text{RhCp}^*\text{Cl}_2]_2$  (12.4 mg, 5 mol%),  $\text{AgSbF}_6$  (27.5 mg, 20 mol%), PivOH (40 mg, 0.4 mmol, 1.0 equiv) and AgOAc (153.6 mg, 0.92 mmol, 2.3 equiv) were weighted in a pressure tube equipped with a stir bar. PhCl (4 mL) was added and the mixture was stirred at 100 °C for 12 h under air atmosphere. After the solvent was removed under reduced pressure, the residue was purified by silica gel chromatography using EtOAc/petroleum ether = 1:10 to afford **73** in 45% (70.6 mg) yield.

**Step2:** A mixture of arene **73** (39.2 mg, 0.1 mmol, 1.0 equiv),  $[\text{RhCp}^*\text{Cl}_2]_2$  (3.1 mg, 5 mol%),  $\text{AgSbF}_6$  (6.9 mg, 20 mol%), NaOAc (8.2 mg, 0.1 mmol, 1.0 equiv) and AgOAc (38.4 mg, 0.23 mmol, 2.3 equiv) were weighted in a pressure tube equipped with a stir bar. 1,4-Dioxane (1 mL) was added

and the mixture was stirred at 80 °C for 24 h under air atmosphere. After the solvent was removed under reduced pressure, the residue was purified by silica gel chromatography using EtOAc/petroleum ether = 1:10 to afford **73** (67% was recovered), the product **48** was not detected.

#### 4. X-Ray Crystal Structure of 32 and intermediate A.

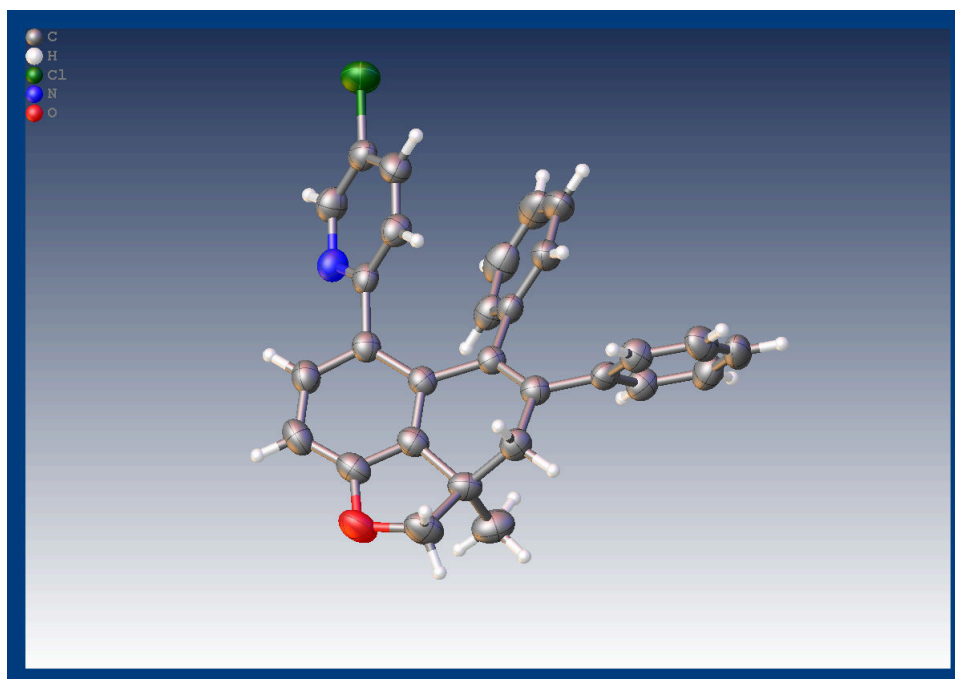

(CCDC 2143654)

**Table 1 Crystal data and structure refinement for 32.**

|                                  |                                      |
|----------------------------------|--------------------------------------|
| Identification code              | SLC-20220107                         |
| Empirical formula                | C <sub>29</sub> H <sub>22</sub> ClNO |
| Formula weight                   | 435.92                               |
| Temperature/K                    | 293(2)                               |
| Crystal system                   | monoclinic                           |
| Space group                      | P2 <sub>1</sub> /n                   |
| a/Å                              | 16.7731(3)                           |
| b/Å                              | 7.1332(2)                            |
| c/Å                              | 19.2367(4)                           |
| $\alpha$ /°                      | 90                                   |
| $\beta$ /°                       | 104.828(2)                           |
| $\gamma$ /°                      | 90                                   |
| Volume/Å <sup>3</sup>            | 2224.95(9)                           |
| Z                                | 4                                    |
| $\rho_{\text{calc}}/\text{cm}^3$ | 1.301                                |
| $\mu/\text{mm}^{-1}$             | 1.679                                |
| F(000)                           | 912.0                                |
| Crystal size/mm <sup>3</sup>     | 0.1 × 0.1 × 0.1                      |
| Radiation                        | Cu K $\alpha$ ( $\lambda$ = 1.54184) |
|                                  | S37                                  |

|                                                  |                                                                  |
|--------------------------------------------------|------------------------------------------------------------------|
| 2 $\theta$ range for data collection/ $^{\circ}$ | 8.1 to 143.932                                                   |
| Index ranges                                     | $-20 \leq h \leq 15$ , $-8 \leq k \leq 8$ , $-23 \leq l \leq 22$ |
| Reflections collected                            | 10420                                                            |
| Independent reflections                          | 4246 [ $R_{\text{int}} = 0.0204$ , $R_{\text{sigma}} = 0.0267$ ] |
| Data/restraints/parameters                       | 4246/0/290                                                       |
| Goodness-of-fit on $F^2$                         | 1.084                                                            |
| Final R indexes [ $I \geq 2\sigma(I)$ ]          | $R_1 = 0.0490$ , $wR_2 = 0.1322$                                 |
| Final R indexes [all data]                       | $R_1 = 0.0608$ , $wR_2 = 0.1374$                                 |
| Largest diff. peak/hole / $e \text{ \AA}^{-3}$   | 0.26/-0.18                                                       |

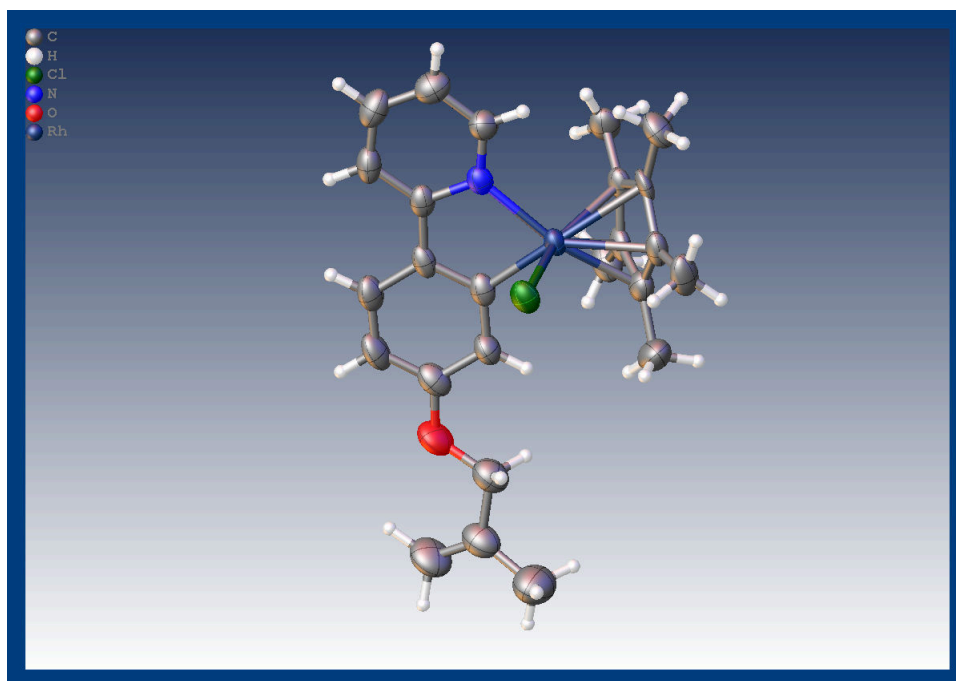

(CCDC 2158590)

**Table 1 Crystal data and structure refinement for intermediate A.**

|                     |                              |
|---------------------|------------------------------|
| Identification code | SLC-20220315                 |
| Empirical formula   | $C_{50}H_{58}Cl_2N_2O_2Rh_2$ |
| Formula weight      | 995.70                       |
| Temperature/K       | 293(2)                       |
| Crystal system      | monoclinic                   |
| Space group         | $P2_1/c$                     |
| $a/\text{\AA}$      | 18.7457(2)                   |
| $b/\text{\AA}$      | 7.72790(10)                  |
| $c/\text{\AA}$      | 31.2170(4)                   |
| $\alpha/^\circ$     | 90                           |
| $\beta/^\circ$      | 93.5280(10)                  |
| $\gamma/^\circ$     | 90                           |

|                                             |                                                               |
|---------------------------------------------|---------------------------------------------------------------|
| Volume/Å <sup>3</sup>                       | 4513.68(10)                                                   |
| Z                                           | 4                                                             |
| $\rho_{\text{calc}}/\text{cm}^3$            | 1.465                                                         |
| $\mu/\text{mm}^{-1}$                        | 7.317                                                         |
| F(000)                                      | 2048.0                                                        |
| Crystal size/mm <sup>3</sup>                | 0.1 × 0.1 × 0.1                                               |
| Radiation                                   | Cu K $\alpha$ ( $\lambda = 1.54184$ )                         |
| 2 $\theta$ range for data collection/°      | 7.604 to 143.012                                              |
| Index ranges                                | -14 ≤ h ≤ 23, -7 ≤ k ≤ 9, -37 ≤ l ≤ 38                        |
| Reflections collected                       | 18072                                                         |
| Independent reflections                     | 8597 [R <sub>int</sub> = 0.0419, R <sub>sigma</sub> = 0.0562] |
| Data/restraints/parameters                  | 8597/0/551                                                    |
| Goodness-of-fit on F <sup>2</sup>           | 1.041                                                         |
| Final R indexes [I ≥ 2 $\sigma$ (I)]        | R <sub>1</sub> = 0.0466, wR <sub>2</sub> = 0.1166             |
| Final R indexes [all data]                  | R <sub>1</sub> = 0.0583, wR <sub>2</sub> = 0.1232             |
| Largest diff. peak/hole / e Å <sup>-3</sup> | 1.22/-0.75                                                    |

## 5. References

1. a) M. J. Mio, L. C. Kopel, J. B. Braun, T. L. Gadzikwa, K. L. Hull, R. G. Brisbois, C. J. Markworth and P. A. Grieco, *Org. Lett.*, 2002, **4**, 3199-3202; b) J. M. Ketcham, B. Biannic and A. Aponick, *Chem. Commun.*, 2013, **49**, 4157-4159; c) J. Chen, C. Chen, J. J. Chen, G. H. Wang and H. M. Qu, *Chem. Commun.*, 2015, **51**, 1356-1359; d) S. N. Wu, Z. Wang, Y. W. Bao, C. Chen, K. Liu and B. L. Zhu, *Chem. Commun.*, 2020, **56**, 4408-4411.
2. J. Ding, W. Jiang, H.-Y. Bai, T.-M. Ding, D. Gao, X. Bao and S.-Y. Zhang, *Chem. Commun.*, 2018, **54**, 8889-8892.
3. A. T.-Aca, S. Y. Lee, S. Sakamoto and J. F. Hartwig, *ACS Catal.*, 2021, **11**, 1430-1434.
4. K.-i. Fujita, Y. Takahashi, M. Owaki, K. Yamamoto and R. Yamaguchi, *Org. Lett.*, 2004, **6**, 2785-2788.
5. a) B. Ye and N. Cramer, *J. Am. Chem. Soc.*, 2013, **135**, 636-639; b) G. Smits, B. Audic, M. D. Wodrich, C. Corminboeuf and N. Cramer, *Chem. Sci.*, 2017, **8**, 7174-7179; c) Y. Sun and N. Cramer, *Chem. Sci.*, 2018, **9**, 2981-2985; d) Y. Sun and N. Cramer, *Angew. Chem., Int. Ed.*, 2018, **57**, 15539-15543.
6. H. Li, X. Yan, J. Zhang, W. Guo, J. Jiang and J. Wang, *Angew. Chem., Int. Ed.*, 2019, **58**, 6732-6736.
7. I. R. Hazelden, X. Ma, T. Langer and J. F. Bower, *Angew. Chem., Int. Ed.*, 2016, **55**, 11198-11202.
8. X. Wang, X. Li, Y. Zhang and L. Xia, *Org. Biomol. Chem.*, 2018, **16**, 2860-2864.
9. P. Li, X. Xu, J. Chen, H. Yao and A. Lin, *Org. Chem. Front.*, 2018, **5**, 1777-1781.



## 6. Characterization Data

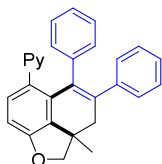

2-(2a-methyl-4,5-diphenyl-2a,3-dihydro-2H-naphtho[1,8-*bc*]furan-6-yl)pyridine (**3**). Brown solid (62.7 mg, 78%, m.p. 81 - 82 °C). <sup>1</sup>H NMR (600 MHz, CDCl<sub>3</sub>) δ 8.16 (d, *J* = 4.4 Hz, 1H), 7.15 (d, *J* = 8.1 Hz, 1H), 7.12 - 7.08 (m, 3H), 7.05 (t, *J* = 7.3 Hz, 1H), 6.92 (d, *J* = 7.1 Hz, 2H), 6.83 - 6.81 (m, 2H), 6.72 - 6.71 (m, 2H), 6.70 - 6.68 (m, 4H), 4.58 (d, *J* = 8.1 Hz, 1H), 4.37 (d, *J* = 8.1 Hz, 1H), 3.32 (d, *J* = 14.5 Hz, 1H), 2.62 (d, *J* = 14.5 Hz, 1H), 1.43 (s, 3H). <sup>13</sup>C NMR (150 MHz, CDCl<sub>3</sub>) δ 159.3, 157.0, 148.4, 144.3, 138.8, 138.7, 134.7, 134.2, 134.0, 132.6, 131.5, 131.4, 131.0, 128.4, 127.9, 126.9, 126.1, 125.8, 124.6, 120.1, 109.1, 86.6, 43.2, 40.8, 21.2. HRMS (ESI-TOF) *m/z*: [M + H]<sup>+</sup> Calcd for C<sub>29</sub>H<sub>24</sub>NO<sup>+</sup> 402.1852, Found: 402.1853.

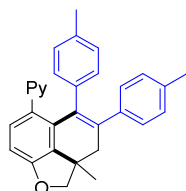

2-(2a-methyl-4,5-di-*p*-tolyl-2a,3-dihydro-2H-naphtho[1,8-*bc*]furan-6-yl)pyridine (**4**). Brown solid (55.9 mg, 65%, m.p. 82 - 83 °C). <sup>1</sup>H NMR (600 MHz, CDCl<sub>3</sub>) δ 8.15 (d, *J* = 4.3 Hz, 1H), 7.13 (d, *J* = 8.1 Hz, 1H), 7.07 (t, *J* = 7.3 Hz, 1H), 6.91 (d, *J* = 7.9 Hz, 2H), 6.82 (d, *J* = 8.0 Hz, 2H), 6.79 (d, *J* = 8.2 Hz, 1H), 6.75 (d, *J* = 7.7 Hz, 1H), 6.72 - 6.67 (m, 1H), 6.58 (d, *J* = 7.5 Hz, 2H), 6.46 (d, *J* = 7.9 Hz, 2H), 4.56 (d, *J* = 8.1 Hz, 1H), 4.34 (d, *J* = 8.1 Hz, 1H), 3.28 (d, *J* = 14.4 Hz, 1H), 2.57 (d, *J* = 14.4 Hz, 1H), 2.24 (s, 3H), 2.02 (s, 3H), 1.39 (s, 3H). <sup>13</sup>C NMR (150 MHz, CDCl<sub>3</sub>) δ 159.4, 157.0, 148.3, 141.5, 138.0, 135.9, 135.6, 135.0, 134.5, 134.0, 133.8, 132.6, 131.9, 131.5, 131.0, 128.7, 128.4, 127.7, 124.8, 119.6, 109.0, 86.6, 43.3, 40.8, 21.3, 21.2, 21.0. HRMS (ESI-TOF) *m/z*: [M + H]<sup>+</sup> Calcd for C<sub>31</sub>H<sub>28</sub>NO<sup>+</sup> 430.2165, Found: 430.2164.

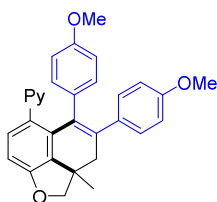

2-(4,5-bis(4-methoxyphenyl)-2a-methyl-2a,3-dihydro-2H-naphtho[1,8-*bc*]furan-6-yl)pyridine (**5**). Brown solid (61.9 mg, 67%, m.p. 89 - 90 °C). <sup>1</sup>H NMR (600 MHz, CDCl<sub>3</sub>) δ 8.18 (d, *J* = 4.4 Hz, 1H), 7.14 - 7.12 (m, 2H), 6.85 (d, *J* = 8.7 Hz, 2H), 6.78 (t, *J* = 6.9 Hz, 2H), 6.72 (dd, *J* = 7.0, 5.4 Hz, 1H), 6.65 (d, *J* = 8.8 Hz, 2H), 6.62 (d, *J* = 8.2 Hz, 2H), 6.24 (d, *J* = 8.8 Hz, 2H), 4.56 (d, *J* = 8.1 Hz, 1H), 4.34 (d, *J* = 8.1 Hz, 1H), 3.72 (s, 3H), 3.59 (s, 3H), 3.27 (d, *J* = 14.4 Hz, 1H), 2.57 (d, *J* = 14.3 Hz, 1H), 1.39 (s, 3H). <sup>13</sup>C NMR (150 MHz, CDCl<sub>3</sub>) δ 159.5, 157.7, 157.4, 157.0, 148.4, 137.6, 136.8, 134.6, 133.9, 133.2, 132.6, 132.2, 131.9, 131.6, 131.4, 129.7, 124.8, 119.9, 113.4, 112.7, 109.0, 86.6, 55.19 (s, 2H), 55.17 (s, 2H), 43.3, 40.7, 21.1. HRMS (ESI-TOF) *m/z*: [M + H]<sup>+</sup> Calcd for C<sub>31</sub>H<sub>28</sub>NO<sub>3</sub><sup>+</sup> 462.2064, Found: 462.2063.

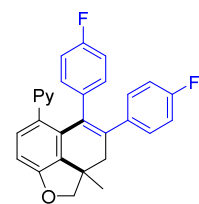

2-(4,5-bis(4-fluorophenyl)-2a-methyl-2a,3-dihydro-2H-naphtho[1,8-*bc*]furan-6-yl)pyridine (**6**). Yellow solid (68.3 mg, 78%, m.p. 162 - 163 °C). <sup>1</sup>H NMR (600 MHz, CDCl<sub>3</sub>) δ 8.16 (d, *J* = 4.4 Hz, 1H), 7.19 (t, *J* = 7.1 Hz, 1H), 7.12 (d, *J* = 8.2 Hz, 1H), 6.87 - 6.75 (m, 7H), 6.69 - 6.62 (m, 2H), 6.39 (t, *J* = 8.8 Hz, 2H), 4.57 (d, *J* = 8.2 Hz, 1H), 4.35 (d, *J* = 8.2 Hz, 1H), 3.29 (d, *J* = 14.5 Hz, 1H), 2.56 (d, *J* = 14.5 Hz, 1H), 1.40 (s, 3H). <sup>13</sup>C NMR (151 MHz, CDCl<sub>3</sub>) δ 161.1 (d, *J* = 245.7 Hz, 1C), 160.8 (d, *J* = 245.4

Hz, 1C), 159.2, 157.0, 148.4, 139.8 (d,  $J = 3.3$  Hz, 1C), 137.8, 134.9, 134.7 (d,  $J = 3.1$  Hz, 1C), 133.9, 133.5, 132.6, 132.4, 131.3, 131.0, 129.9 (d,  $J = 7.8$  Hz, 2C), 124.5, 120.2, 114.96 (d,  $J = 21.2$  Hz, 2C), 113.88 (d,  $J = 21.5$  Hz, 2C), 109.3, 86.4, 43.0, 40.7, 21.2.  $^{19}\text{F}$  NMR (565 MHz,  $\text{CDCl}_3$ )  $\delta$  -115.7, -116.6. HRMS (ESI-TOF)  $m/z$ :  $[\text{M} + \text{H}]^+$  Calcd for  $\text{C}_{29}\text{H}_{22}\text{F}_2\text{NO}^+$  438.1664, Found: 438.1664.

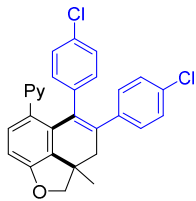

2-(4,5-bis(4-chlorophenyl)-2a-methyl-2a,3-dihydro-2H-naphtho[1,8-*bc*]furan-6-yl)pyridine (**7**). Yellow solid (77.1 mg, 82%, m.p. 173 - 174 °C).  $^1\text{H}$  NMR (600 MHz,  $\text{CDCl}_3$ )  $\delta$  8.15 (d,  $J = 4.3$  Hz, 1H), 7.20 (t,  $J = 7.2$  Hz, 1H), 7.12 (d,  $J = 8.2$  Hz, 1H), 7.09 (d,  $J = 8.5$  Hz, 2H), 6.86 - 6.78 (m, 5H), 6.67 - 6.63 (m, 4H), 4.57 (d,  $J = 8.2$  Hz, 1H), 4.34 (d,  $J = 8.2$  Hz, 1H), 3.28 (d,  $J = 14.5$  Hz, 1H), 2.55 (d,  $J = 14.5$  Hz, 1H), 1.38 (s, 3H).  $^{13}\text{C}$  NMR (150 MHz,  $\text{CDCl}_3$ )  $\delta$  159.2, 157.2, 148.6, 142.3, 137.9, 137.2, 135.1, 134.0, 133.7, 132.7, 132.2, 131.7, 131.4, 130.9, 129.8, 128.4, 127.3, 124.5, 120.2, 109.5, 86.5, 43.0, 40.8, 21.3. HRMS (ESI-TOF)  $m/z$ :  $[\text{M} + \text{H}]^+$  Calcd for  $\text{C}_{29}\text{H}_{22}\text{Cl}_2\text{NO}^+$  470.1073, Found: 470.1072.

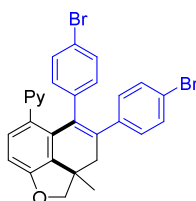

2-(4,5-bis(4-bromophenyl)-2a-methyl-2a,3-dihydro-2H-naphtho[1,8-*bc*]furan-6-yl)pyridine (**8**). Yellow solid (74.7 mg, 67%, m.p. 180 - 181 °C).  $^1\text{H}$  NMR (600 MHz,  $\text{CDCl}_3$ )  $\delta$  8.14 (d,  $J = 4.4$  Hz, 1H), 7.26 - 7.23 (m, 2H), 7.21 (t,  $J = 7.2$  Hz, 1H), 7.12 (d,  $J = 8.2$  Hz, 1H), 6.84 - 6.81 (m, 5H), 6.77 (d,  $J = 8.4$  Hz, 2H), 6.57 (d,  $J = 7.6$  Hz, 2H), 4.57 (d,  $J = 8.2$  Hz, 1H), 4.34 (d,  $J = 8.2$  Hz, 1H), 3.28 (d,  $J = 14.5$  Hz, 1H), 2.54 (d,  $J = 14.5$  Hz, 1H), 1.38 (s, 3H).  $^{13}\text{C}$  NMR (100 MHz,  $\text{CDCl}_3$ )  $\delta$  159.2, 157.2, 148.6, 142.7, 137.8, 137.7, 135.1, 134.0, 133.7, 132.7, 132.6, 131.5, 131.4, 130.8, 130.3, 130.1, 124.5, 120.4, 120.2, 120.1, 109.6, 86.5, 43.0, 40.8, 21.3. HRMS (ESI-TOF)  $m/z$ :  $[\text{M} + \text{H}]^+$  Calcd for  $\text{C}_{29}\text{H}_{22}\text{Br}_2\text{NO}^+$  558.0063, Found: 558.0050.

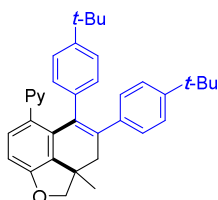

2-(4,5-bis(4-*tert*-butylphenyl)-2a-methyl-2a,3-dihydro-2H-naphtho[1,8-*bc*]furan-6-yl)pyridine (**9**). Yellow solid (64.8 mg, 63%, m.p. 102 - 103 °C).  $^1\text{H}$  NMR (400 MHz,  $\text{CDCl}_3$ )  $\delta$  8.13 (d,  $J = 4.4$  Hz, 1H), 7.13 (d,  $J = 8.2$  Hz, 1H), 7.11 - 7.01 (m, 3H), 6.84 (d,  $J = 8.4$  Hz, 2H), 6.78 (t,  $J = 8.1$  Hz, 2H), 6.67 - 6.59 (m, 5H), 4.57 (d,  $J = 8.1$  Hz, 1H), 4.36 (d,  $J = 8.2$  Hz, 1H), 3.29 (d,  $J = 14.6$  Hz, 1H), 2.62 (d,  $J = 14.6$  Hz, 1H), 1.41 (s, 3H), 1.23 (s, 9H), 1.10 (s, 9H).  $^{13}\text{C}$  NMR (150 MHz,  $\text{CDCl}_3$ )  $\delta$  159.4, 157.0, 148.9, 148.2, 148.0, 141.3, 138.3, 135.9, 134.4, 133.9, 133.8, 132.5, 131.8, 131.6, 130.8, 128.1, 124.8, 124.6, 123.6, 120.1, 108.9, 86.7, 43.0, 40.8, 34.5, 34.2, 31.4, 31.2, 21.2. HRMS (ESI-TOF)  $m/z$ :  $[\text{M} + \text{H}]^+$  Calcd for  $\text{C}_{37}\text{H}_{40}\text{NO}^+$  514.3104, Found: 514.3102.

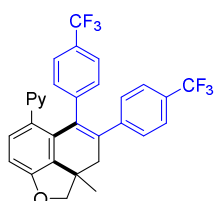

2-(2a-methyl-4,5-bis(4-(trifluoromethyl)phenyl)-2a,3-dihydro-2H-naphtho[1,8-*bc*]furan-6-yl)pyridine (**10**). Yellow solid (80.7 mg, 75%, m.p. 180 - 181 °C).  $^1\text{H}$  NMR (600 MHz,  $\text{CDCl}_3$ )  $\delta$  8.09 (d,  $J = 4.4$  Hz, 1H), 7.38 (d,  $J = 8.1$  Hz, 2H), 7.18 (td,  $J = 7.7, 1.3$  Hz, 1H), 7.13 (d,  $J = 8.2$  Hz, 1H), 7.01 (d,  $J = 8.0$  Hz, 2H), 6.95 (d,  $J = 8.1$  Hz, 2H), 6.86 - 6.84 (m, 4H), 6.74 - 6.70 (m, 1H), 4.60 (d,  $J = 8.2$  Hz, 1H), 4.37 (d,  $J = 8.2$  Hz, 1H), 3.35 (d,  $J = 14.6$  Hz, 1H), 2.59 (d,  $J = 14.6$  Hz, 1H), 1.42 (s, 3H).  $^{13}\text{C}$  NMR (150 MHz,  $\text{CDCl}_3$ )  $\delta$  159.1, 157.3, 148.7, 147.3, 142.4, 138.4, 135.2, 134.4, 134.1, 132.7, 131.6, 131.3, 130.4, 128.7, 128.7 (q,  $J = 32.1$  Hz, 1C), 128.1 (q,  $J = 32.3$  Hz, 1C), 125.3 (q,  $J = 3.9$  Hz,

2C), 124.3, 124.1 (q,  $J = 271.9$  Hz, 1C), 124.1 (q,  $J = 2.8$  Hz, 2C), 124.0 (q,  $J = 272.0$  Hz, 1C), 120.6, 109.9, 86.5, 43.1, 40.8, 21.4.  $^{19}\text{F}$  NMR (565 MHz,  $\text{CDCl}_3$ )  $\delta$  -62.5, -62.9. HRMS (ESI-TOF)  $m/z$ :  $[\text{M} + \text{H}]^+$  Calcd for  $\text{C}_{31}\text{H}_{22}\text{F}_6\text{NO}^+$  538.1600, Found: 538.1599.

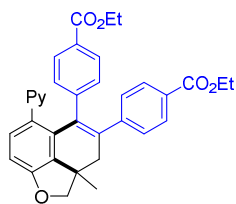

diethyl

4,4'-(2a-methyl-6-(pyridin-2-yl)-2a,3-dihydro-2H-naphtho[1,8-*bc*]furan-4,5-diyl)dibenzoate (**11**). Yellow solid (61.2 mg, 56%, m.p. 103 - 104 °C).  $^1\text{H}$  NMR (600 MHz,  $\text{CDCl}_3$ )  $\delta$  8.08 (d,  $J = 4.4$  Hz, 1H), 7.77 (d,  $J = 8.5$  Hz, 2H), 7.35 (d,  $J = 8.0$  Hz, 2H), 7.18 - 7.10 (m, 2H), 6.94 (d,  $J = 8.2$  Hz, 2H), 6.87 (d,  $J = 7.8$  Hz, 1H), 6.83 (d,  $J = 8.2$  Hz, 1H), 6.78 (d,  $J = 6.1$  Hz, 2H), 6.68 - 6.66 (m, 1H), 4.58 (d,  $J = 8.2$  Hz, 1H), 4.36 (d,  $J = 8.2$  Hz, 1H), 4.33 - 4.29 (m, 2H), 4.26 (q,  $J = 7.1$  Hz, 2H), 3.33 (d,  $J = 14.6$  Hz, 1H), 2.58 (d,  $J = 14.5$  Hz, 1H), 1.40 (s, 3H), 1.33 (q,  $J = 7.1$  Hz, 6H).  $^{13}\text{C}$  NMR (150 MHz,  $\text{CDCl}_3$ )  $\delta$  166.41, 166.38, 159.1, 157.2, 148.6, 143.7, 138.9, 135.2, 134.5, 134.2, 132.6, 131.6, 130.6, 129.5, 128.44, 128.35, 128.31, 127.9, 124.3, 120.4, 109.7, 86.5, 61.0, 60.8, 43.1, 40.8, 21.3, 14.38, 14.37. HRMS (ESI-TOF)  $m/z$ :  $[\text{M} + \text{H}]^+$  Calcd for  $\text{C}_{35}\text{H}_{32}\text{NO}_5^+$  546.2275, Found: 546.2273.

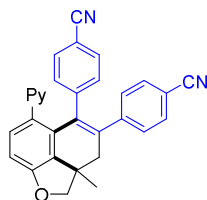

4,4'-(2a-methyl-6-(pyridin-2-yl)-2a,3-dihydro-2H-naphtho[1,8-*bc*]furan-4,5-diyl)dibenzonitrile (**12**). Yellow solid (25.3 mg, 28%, m.p. 247 - 248 °C).  $^1\text{H}$  NMR (600 MHz,  $\text{CDCl}_3$ )  $\delta$  8.08 (d,  $J = 4.2$  Hz, 1H), 7.42 (d,  $J = 8.5$  Hz, 2H), 7.29 - 7.24 (m, 1H), 7.14 (d,  $J = 8.2$  Hz, 1H), 7.01 (d,  $J = 8.2$  Hz, 2H), 6.97 (d,  $J = 8.1$  Hz, 2H), 6.94 (d,  $J = 7.8$  Hz, 1H), 6.87 (d,  $J = 8.2$  Hz, 1H), 6.86 - 6.77 (m, 3H), 4.60 (d,  $J = 8.3$  Hz, 1H), 4.37 (d,  $J = 8.3$  Hz, 1H), 3.35 (d,  $J = 14.6$  Hz, 1H), 2.57 (d,  $J = 14.6$  Hz, 1H), 1.39 (s, 3H).  $^{13}\text{C}$  NMR (150 MHz,  $\text{CDCl}_3$ )  $\delta$  159.0, 157.4, 148.8, 148.3, 143.7, 138.7, 135.6, 134.8, 134.3, 132.9, 132.2, 131.5, 131.0, 129.8, 129.2, 124.2, 120.7, 118.7, 118.6, 110.6, 110.3, 109.9, 86.4, 42.9, 40.7, 21.4. HRMS (ESI-TOF)  $m/z$ :  $[\text{M} + \text{H}]^+$  Calcd for  $\text{C}_{31}\text{H}_{22}\text{N}_3\text{O}^+$  452.1757, Found: 452.1757.

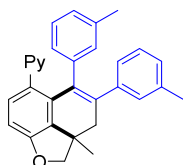

2-(2a-methyl-4,5-di-*m*-tolyl-2a,3-dihydro-2H-naphtho[1,8-*bc*]furan-6-yl)pyridine (**13**). Yellow solid (49.0 mg, 57%, m.p. 78 - 79 °C).  $^1\text{H}$  NMR (600 MHz,  $\text{DMSO-}d_6$ )  $\delta$  8.07 (d,  $J = 4.4$  Hz, 1H), 7.15 (t,  $J = 7.5$  Hz, 1H), 7.02 (d,  $J = 8.1$  Hz, 1H), 6.95 (t,  $J = 7.6$  Hz, 1H), 6.85 (d,  $J = 7.5$  Hz, 1H), 6.79 - 6.72 (m, 4H), 6.64 (d,  $J = 7.6$  Hz, 1H), 6.52 (t,  $J = 7.6$  Hz, 1H), 6.45 (d,  $J = 7.5$  Hz, 1H), 6.40 - 6.35 (m, 2H), 4.56 (d,  $J = 8.3$  Hz, 1H), 4.32 (d,  $J = 8.4$  Hz, 1H), 3.23 (d,  $J = 14.9$  Hz, 1H), 2.50 - 2.48 (m, 1H), 2.10 (s, 3H), 1.84 (s, 3H), 1.30 (s, 3H).  $^{13}\text{C}$  NMR (150 MHz,  $\text{DMSO-}d_6$ )  $\delta$  159.0, 156.8, 148.2, 144.4, 138.8, 138.6, 137.3, 135.8, 134.9, 134.3, 133.7, 132.6, 131.8, 131.6, 131.3, 128.9, 128.4, 128.1, 127.2, 126.9, 126.5, 125.6, 124.3, 120.5, 108.9, 86.2, 43.2, 40.5, 21.4, 21.3, 21.1. HRMS (ESI-TOF)  $m/z$ :  $[\text{M} + \text{H}]^+$  Calcd for  $\text{C}_{31}\text{H}_{28}\text{NO}^+$  430.2165, Found: 430.2163.

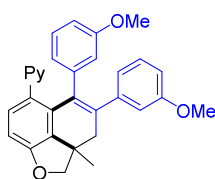

2-(4,5-bis(3-methoxyphenyl)-2a-methyl-2a,3-dihydro-2H-naphtho[1,8-*bc*]furan-6-yl)pyridine (**14**). Brown solid (56.4 mg, 61%, m.p. 74 - 75 °C).  $^1\text{H}$  NMR (600 MHz,  $\text{CDCl}_3$ )  $\delta$  8.17 (d,  $J = 4.4$  Hz, 1H), 7.15 - 7.13 (m, 2H), 7.03 (t,  $J = 7.9$  Hz, 1H), 6.86 (d,  $J = 7.8$  Hz, 1H), 6.81 (d,  $J = 8.1$  Hz, 1H), 6.73 - 6.71 (m, 1H), 6.63 - 6.59 (m, 2H), 6.56 (d,  $J = 7.7$  Hz, 1H), 6.45 (s, 1H), 6.36 (d,  $J = 6.8$  Hz, 1H),

6.26 (d,  $J = 6.2$  Hz, 2H), 4.58 (d,  $J = 8.1$  Hz, 1H), 4.36 (d,  $J = 8.2$  Hz, 1H), 3.54 (s, 3H), 3.45 (s, 3H), 3.29 (d,  $J = 14.6$  Hz, 1H), 2.62 (d,  $J = 14.5$  Hz, 1H), 1.41 (s, 3H).  $^{13}\text{C}$  NMR (150 MHz,  $\text{CDCl}_3$ )  $\delta$  159.4, 159.2, 158.2, 157.1, 148.3, 145.6, 140.2, 138.6, 134.7, 134.1, 134.0, 132.5, 131.6, 131.2, 129.0, 128.0, 124.5, 120.7, 120.2, 113.8, 112.7, 112.3, 109.2, 86.6, 55.2, 55.1, 43.1, 40.8, 21.3. HRMS (ESI-TOF)  $m/z$ :  $[\text{M} + \text{H}]^+$  Calcd for  $\text{C}_{31}\text{H}_{28}\text{NO}_3^+$  462.2064, Found: 462.2063.

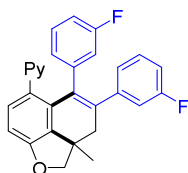

2-(4,5-bis(3-fluorophenyl)-2a-methyl-2a,3-dihydro-2H-naphtho[1,8-*bc*]furan-6-yl)pyridine (**15**). Brown solid (63.1 mg, 72%, m.p. 104 - 105 °C).  $^1\text{H}$  NMR (600 MHz,  $\text{CDCl}_3$ )  $\delta$  8.17 (d,  $J = 4.4$  Hz, 1H), 7.22 (td,  $J = 7.7, 1.5$  Hz, 1H), 7.12 (d,  $J = 8.2$  Hz, 1H), 7.09 - 7.05 (m, 1H), 6.91 (d,  $J = 7.7$  Hz, 1H), 6.83 (d,  $J = 8.2$  Hz, 1H), 6.79 - 6.73 (m, 2H), 6.67 - 6.66 (m, 2H), 6.63 - 6.61 (m, 1H), 6.53 (d,  $J = 7.1$  Hz, 1H), 6.43 - 6.40 (m, 2H), 4.58 (d,  $J = 8.2$  Hz, 1H), 4.35 (d,  $J = 8.2$  Hz, 1H), 3.28 (d,  $J = 14.6$  Hz, 1H), 2.58 (d,  $J = 14.6$  Hz, 1H), 1.40 (s, 3H).  $^{13}\text{C}$  NMR (150 MHz,  $\text{CDCl}_3$ )  $\delta$  162.6 (d,  $J = 245.8$  Hz, 1C), 161.7 (d,  $J = 244.7$  Hz, 1C), 159.3, 157.2, 148.5, 146.0 (d,  $J = 7.6$  Hz, 1C), 141.0 (d,  $J = 7.9$  Hz, 1C), 138.2, 135.0, 134.1, 133.9 (d,  $J = 1.7$  Hz, 1C), 132.6, 131.6, 130.7, 129.7, 129.6, 128.6 (d,  $J = 8.4$  Hz, 1C), 124.3, 124.1 (d,  $J = 2.9$  Hz, 1C), 120.5, 115.2 (d,  $J = 21.8$  Hz, 1C), 113.4 (d,  $J = 21.0$  Hz, 1C), 113.0 (d,  $J = 21.0$  Hz, 1C), 109.6, 86.5, 43.0, 40.8, 21.3.  $^{19}\text{F}$  NMR (565 MHz,  $\text{CDCl}_3$ )  $\delta$  -113.2, -115.3. HRMS (ESI-TOF)  $m/z$ :  $[\text{M} + \text{H}]^+$  Calcd for  $\text{C}_{29}\text{H}_{22}\text{F}_2\text{NO}^+$  438.1664, Found: 438.1667.

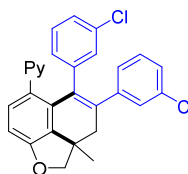

2-(4,5-bis(3-chlorophenyl)-2a-methyl-2a,3-dihydro-2H-naphtho[1,8-*bc*]furan-6-yl)pyridine (**16**). Brown solid (75.2 mg, 80%, m.p. 137 - 138 °C).  $^1\text{H}$  NMR (600 MHz,  $\text{CDCl}_3$ )  $\delta$  8.16 (d,  $J = 3.9$  Hz, 1H), 7.26 - 7.24 (m, 1H), 7.11 (d,  $J = 8.1$  Hz, 1H), 7.07 - 7.04 (m, 1H), 7.02 (t,  $J = 7.8$  Hz, 1H), 6.95 - 6.89 (m, 2H), 6.82 (d,  $J = 8.2$  Hz, 1H), 6.76 - 6.74 (m, 2H), 6.72 - 6.67 (m, 2H), 6.66 - 6.62 (m, 2H), 4.58 (d,  $J = 8.2$  Hz, 1H), 4.35 (d,  $J = 8.2$  Hz, 1H), 3.28 (d,  $J = 14.6$  Hz, 1H), 2.57 (d,  $J = 14.6$  Hz, 1H), 1.40 (s, 3H).  $^{13}\text{C}$  NMR (150 MHz,  $\text{CDCl}_3$ )  $\delta$  159.2, 157.2, 148.6, 145.5, 140.4, 138.1, 135.0, 134.00, 133.97, 133.9, 132.9, 132.6, 131.6, 130.5, 129.4, 128.3, 126.70, 126.66, 126.2, 124.2, 120.5, 109.6, 86.5, 42.9, 40.7, 21.4. HRMS (ESI-TOF)  $m/z$ :  $[\text{M} + \text{H}]^+$  Calcd for  $\text{C}_{29}\text{H}_{22}\text{Cl}_2\text{NO}^+$  470.1073, Found: 470.1074.

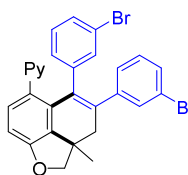

2-(4,5-bis(3-bromophenyl)-2a-methyl-2a,3-dihydro-2H-naphtho[1,8-*bc*]furan-6-yl)pyridine (**17**). Brown solid (82.6 mg, 74%, m.p. 111 - 112 °C).  $^1\text{H}$  NMR (600 MHz,  $\text{CDCl}_3$ )  $\delta$  8.17 (d,  $J = 3.1$  Hz, 1H), 7.30 - 7.25 (m, 1H), 7.22 - 7.21 (m, 1H), 7.13 - 7.08 (m, 2H), 6.96 (t,  $J = 7.9$  Hz, 1H), 6.93 - 6.91 (m, 1H), 6.86 - 6.80 (m, 3H), 6.80 - 6.72 (m, 2H), 6.65 (s, 1H), 6.58 (t,  $J = 7.8$  Hz, 1H), 4.58 (d,  $J = 8.2$  Hz, 1H), 4.35 (d,  $J = 8.2$  Hz, 1H), 3.28 (d,  $J = 14.7$  Hz, 1H), 2.58 (d,  $J = 14.6$  Hz, 1H), 1.40 (s, 3H).  $^{13}\text{C}$  NMR (150 MHz,  $\text{CDCl}_3$ )  $\delta$  159.2, 157.2, 148.6, 145.7, 140.6, 138.0, 135.1, 134.0, 133.9, 132.6, 131.6, 131.2, 130.4, 129.63, 129.59, 129.1, 128.6, 128.3, 128.1, 127.2, 124.2, 122.2, 121.3, 120.6, 109.6, 86.5, 43.0, 40.7, 21.4. HRMS (ESI-TOF)  $m/z$ :  $[\text{M} + \text{H}]^+$  Calcd for  $\text{C}_{29}\text{H}_{22}\text{Br}_2\text{NO}^+$  558.0063, Found: 558.0056.

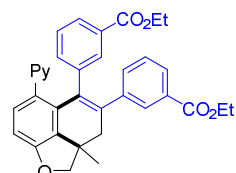

3,3'-(2a-methyl-6-(pyridin-2-yl)-2a,3-dihydro-2H-naphtho[1,8-*bc*]furan-4,5-diyl)dibenzoate (**18**). Yellow solid (81.9 mg, 75%, m.p. 81 - 82 °C).  $^1\text{H}$  NMR (600 MHz,  $\text{CDCl}_3$ )  $\delta$  8.17 (d,  $J = 3.1$  Hz, 1H), 7.30 - 7.25 (m, 1H), 7.22 - 7.21 (m, 1H), 7.13 - 7.08 (m, 2H), 6.96 (t,  $J = 7.9$  Hz, 1H), 6.93 - 6.91 (m, 1H), 6.86 - 6.80 (m, 3H), 6.80 - 6.72 (m, 2H), 6.65 (s, 1H), 6.58 (t,  $J = 7.8$  Hz, 1H), 4.58 (d,  $J = 8.2$  Hz, 1H), 4.35 (d,  $J = 8.2$  Hz, 1H), 3.28 (d,  $J = 14.7$  Hz, 1H), 2.58 (d,  $J = 14.6$  Hz, 1H), 1.40 (s, 3H).  $^{13}\text{C}$  NMR (150 MHz,  $\text{CDCl}_3$ )  $\delta$  159.2, 157.2, 148.6, 145.7, 140.6, 138.0, 135.1, 134.0, 133.9, 132.6, 131.6, 131.2, 130.4, 129.63, 129.59, 129.1, 128.6, 128.3, 128.1, 127.2, 124.2, 122.2, 121.3, 120.6, 109.6, 86.5, 43.0, 40.7, 21.4. HRMS (ESI-TOF)  $m/z$ :  $[\text{M} + \text{H}]^+$  Calcd for  $\text{C}_{29}\text{H}_{22}\text{Br}_2\text{NO}^+$  558.0063, Found: 558.0056.

MHz, CDCl<sub>3</sub>) δ 8.04 (d, *J* = 2.2 Hz, 1H), 7.74 - 7.70 (m, 1H), 7.66 (s, 1H), 7.38 (d, *J* = 7.7 Hz, 2H), 7.16 - 7.06 (m, 3H), 6.98 (d, *J* = 7.7 Hz, 1H), 6.89 (d, *J* = 7.1 Hz, 2H), 6.82 (d, *J* = 8.1 Hz, 1H), 6.74 (s, 1H), 6.66 - 6.63 (m, 1H), 4.58 (d, *J* = 8.2 Hz, 1H), 4.37 (d, *J* = 8.2 Hz, 1H), 4.32 - 4.17 (m, 4H), 3.36 (d, *J* = 14.6 Hz, 1H), 2.61 (d, *J* = 14.6 Hz, 1H), 1.44 (s, 3H), 1.31 - 1.29 (m, 6H). <sup>13</sup>C NMR (150 MHz, CDCl<sub>3</sub>) δ 166.4, 166.3, 159.4, 157.2, 148.5, 143.9, 138.9, 138.5, 135.0, 134.2, 134.0, 133.0, 132.5, 131.5, 130.7, 130.4, 129.5, 129.2, 128.1, 127.6, 127.2, 127.1, 124.2, 120.3, 109.5, 86.5, 61.0, 60.7, 43.0, 40.8, 21.4, 14.4, 14.3. HRMS (ESI-TOF) *m/z*: [M + H]<sup>+</sup> Calcd for C<sub>35</sub>H<sub>32</sub>NO<sub>5</sub><sup>+</sup> 546.2275, Found: 546.2272.

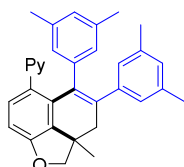

2-(4,5-bis(3,5-dimethylphenyl)-2a-methyl-2a,3-dihydro-2*H*-naphtho[1,8-*bc*]furan-6-yl)pyridine (**19**). Yellow solid (68.7 mg, 75%, m.p. 75 - 76 °C). <sup>1</sup>H NMR (400 MHz, CDCl<sub>3</sub>) δ 8.22 (d, *J* = 4.3 Hz, 1H), 7.14 - 7.05 (m, 2H), 6.80 - 6.77 (m, 2H), 6.71 - 6.68 (m, 2H), 6.55 (s, 2H), 6.28 (s, 3H), 4.57 (d, *J* = 8.1 Hz, 1H), 4.36 (d, *J* = 8.2 Hz, 1H), 3.25 (d, *J* = 14.7 Hz, 1H), 2.61 (d, *J* = 14.7 Hz, 1H), 2.12 (s, 6H), 1.89 (s, 6H), 1.41 (s, 3H). <sup>13</sup>C NMR (150 MHz, CDCl<sub>3</sub>) δ 159.4, 157.0, 147.7, 144.1, 138.4, 138.3, 137.0, 135.8, 134.1, 133.8, 132.4, 131.8, 131.5, 127.7, 127.2, 126.2, 124.4, 120.1, 108.8, 86.7, 43.2, 40.7, 21.30, 21.27, 20.9. HRMS (ESI-TOF) *m/z*: [M + H]<sup>+</sup> Calcd for C<sub>33</sub>H<sub>32</sub>NO<sup>+</sup> 458.2478, Found: 458.2476.

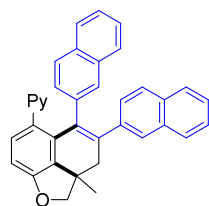

2-(2a-methyl-4,5-di(naphthalen-2-yl)-2a,3-dihydro-2*H*-naphtho[1,8-*bc*]furan-6-yl)pyridine (**20**). Brown solid (75.3 mg, 75%, m.p. 131 - 132 °C). <sup>1</sup>H NMR (600 MHz, CDCl<sub>3</sub>) δ 7.86 (d, *J* = 4.7 Hz, 1H), 7.66 - 7.62 (m, 1H), 7.57 - 7.53 (m, 1H), 7.51 (s, 1H), 7.46 (d, *J* = 8.5 Hz, 1H), 7.43 (d, *J* = 7.8 Hz, 1H), 7.39 - 7.30 (m, 3H), 7.29 - 7.19 (m, 4H), 7.14 (d, *J* = 8.2 Hz, 1H), 7.08 - 7.01 (m, 2H), 6.88 - 6.80 (m, 2H), 6.75 - 6.73 (m, 2H), 6.19 - 6.17 (m, 1H), 4.60 (d, *J* = 8.1 Hz, 1H), 4.40 (d, *J* = 8.1 Hz, 1H), 3.47 (d, *J* = 14.3 Hz, 1H), 2.73 (d, *J* = 14.3 Hz, 1H), 1.49 (s, 3H). <sup>13</sup>C NMR (150 MHz, CDCl<sub>3</sub>) δ 159.4, 157.2, 148.2, 141.8, 138.6, 136.6, 134.5, 134.2, 134.1, 133.3, 132.63, 132.57, 131.93, 131.88, 131.71, 131.69, 129.8, 127.9, 127.61, 127.59, 127.4, 127.2, 127.12, 127.10, 126.4, 125.9, 125.8, 125.3, 125.2, 124.0, 119.2, 109.3, 86.6, 43.7, 40.9, 21.3. HRMS (ESI-TOF) *m/z*: [M + H]<sup>+</sup> Calcd for C<sub>37</sub>H<sub>28</sub>NO<sup>+</sup> 502.2165, Found: 502.2163.

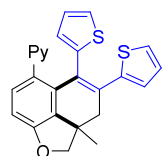

2-(2a-methyl-4,5-di(thiophen-2-yl)-2a,3-dihydro-2*H*-naphtho[1,8-*bc*]furan-6-yl)pyridine (**21**). Black solid (43.0 mg, 52%, m.p. 88 - 89 °C). <sup>1</sup>H NMR (600 MHz, CDCl<sub>3</sub>) δ 8.30 (dd, *J* = 4.9, 0.7 Hz, 1H), 7.29 - 7.25 (m, 1H), 7.15 (dd, *J* = 5.1, 1.0 Hz, 1H), 7.07 (d, *J* = 8.1 Hz, 1H), 6.92 - 6.89 (m, 2H), 6.89 - 6.83 (m, 2H), 6.81 - 6.77 (m, 2H), 6.39 (dd, *J* = 5.0, 3.6 Hz, 1H), 6.36 (dd, *J* = 3.5, 0.9 Hz, 1H), 4.59 (d, *J* = 8.1 Hz, 1H), 4.36 (d, *J* = 8.2 Hz, 1H), 3.24 (d, *J* = 14.5 Hz, 1H), 2.84 (d, *J* = 14.5 Hz, 1H), 1.40 (s, 3H). <sup>13</sup>C NMR (150 MHz, CDCl<sub>3</sub>) δ 159.8, 157.0, 148.3, 145.3, 140.2, 135.0, 134.1, 133.3, 132.7, 131.8, 131.4, 130.0, 127.9, 126.8, 126.44, 126.35, 126.3, 126.0, 124.2, 120.4, 109.3, 86.5, 43.2, 40.7, 21.3. HRMS (ESI-TOF) *m/z*: [M + H]<sup>+</sup> Calcd for C<sub>25</sub>H<sub>20</sub>NOS<sub>2</sub><sup>+</sup> 414.0981, Found: 414.0978.

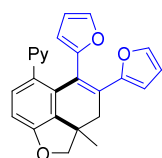

2-(4,5-di(furan-2-yl)-2a-methyl-2a,3-dihydro-2*H*-naphtho[1,8-*bc*]furan-6-yl)pyridine (**22**). Black solid (32.9 mg, 43%, m.p. 84 - 85 °C). <sup>1</sup>H NMR (600 MHz, CDCl<sub>3</sub>) δ 8.40

- 8.36 (m, 1H), 7.38 - 7.32 (m, 2H), 7.16 (d,  $J = 8.1$  Hz, 1H), 7.06 (d,  $J = 1.0$  Hz, 1H), 6.92 (d,  $J = 7.8$  Hz, 1H), 6.90 - 6.88 (m, 1H), 6.79 (d,  $J = 8.1$  Hz, 1H), 6.29 (dd,  $J = 3.5, 1.7$  Hz, 1H), 5.89 (dd,  $J = 3.3, 1.8$  Hz, 1H), 5.74 - 5.69 (m, 1H), 5.39 (d,  $J = 3.5$  Hz, 1H), 4.60 (d,  $J = 8.1$  Hz, 1H), 4.38 (d,  $J = 8.1$  Hz, 1H), 3.18 (d,  $J = 14.8$  Hz, 1H), 2.98 (d,  $J = 14.8$  Hz, 1H), 1.30 (s, 3H).  $^{13}\text{C}$  NMR (150 MHz,  $\text{CDCl}_3$ )  $\delta$  159.3, 157.0, 153.8, 149.9, 148.6, 141.8, 140.1, 134.9, 133.0, 132.7, 131.40, 131.35, 130.1, 123.6, 122.3, 120.2, 111.9, 111.4, 110.6, 110.1, 109.4, 86.6, 40.1, 37.2, 21.0. HRMS (ESI-TOF)  $m/z$ :  $[\text{M} + \text{H}]^+$  Calcd for  $\text{C}_{25}\text{H}_{20}\text{NO}_3^+$  382.1438, Found: 382.1438.

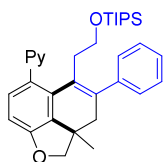

2-(2a-methyl-4-phenyl-5-(2-((triisopropylsilyloxy)ethyl)-2a,3-dihydro-2H-naphtho[1,8-*bc*]furan-6-yl)pyridine (**23**). Yellow oil (43.2 mg, 41%).  $^1\text{H}$  NMR (600 MHz,  $\text{CDCl}_3$ )  $\delta$  8.61 (dd,  $J = 4.9, 0.8$  Hz, 1H), 7.67 (td,  $J = 7.7, 1.8$  Hz, 1H), 7.40 (d,  $J = 7.8$  Hz, 1H), 7.32 (t,  $J = 7.6$  Hz, 2H), 7.27 - 7.24 (m, 2H), 7.22 (t,  $J = 7.3$  Hz, 1H), 7.19 - 7.16 (m, 1H), 7.09 (d,  $J = 8.1$  Hz, 1H), 6.74 (d,  $J = 8.1$  Hz, 1H), 4.53 (d,  $J = 8.1$  Hz, 1H), 4.25 (d,  $J = 8.2$  Hz, 1H), 3.29 - 3.19 (m, 2H), 2.89 (dd,  $J = 15.7, 2.0$  Hz, 1H), 2.52 (d,  $J = 15.7$  Hz, 1H), 2.50 - 2.44 (m, 1H), 1.75 - 1.70 (m, 1H), 1.40 (s, 3H), 0.81 - 0.75 (m, 21H).  $^{13}\text{C}$  NMR (150 MHz,  $\text{CDCl}_3$ )  $\delta$  161.1, 157.2, 149.0, 143.8, 139.5, 136.2, 134.1, 132.1, 131.3, 130.7, 130.0, 128.6, 128.3, 126.7, 124.1, 121.5, 108.4, 86.4, 62.1, 43.1, 40.6, 33.2, 21.3, 18.0, 11.9. HRMS (ESI-TOF)  $m/z$ :  $[\text{M} + \text{H}]^+$  Calcd for  $\text{C}_{34}\text{H}_{44}\text{NO}_2\text{Si}^+$  526.3136, Found: 526.3136.

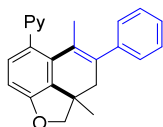

2-(2a,5-dimethyl-4-phenyl-2a,3-dihydro-2H-naphtho[1,8-*bc*]furan-6-yl)pyridine (**24**). Yellow solid (33.3 mg, 49%, m.p. 89 - 90 °C).  $^1\text{H}$  NMR (600 MHz,  $\text{CDCl}_3$ )  $\delta$  8.69 - 8.60 (m, 1H), 7.69 (td,  $J = 7.7, 1.8$  Hz, 1H), 7.41 (d,  $J = 7.8$  Hz, 1H), 7.34 (t,  $J = 7.7$  Hz, 2H), 7.25 - 7.22 (m, 3H), 7.21 - 7.19 (m, 1H), 7.10 (d,  $J = 8.1$  Hz, 1H), 6.76 (d,  $J = 8.1$  Hz, 1H), 4.56 (d,  $J = 8.1$  Hz, 1H), 4.28 (d,  $J = 8.2$  Hz, 1H), 2.86 (dd,  $J = 15.7, 2.5$  Hz, 1H), 2.58 (d,  $J = 15.7$  Hz, 1H), 1.42 - 1.35 (m, 6H).  $^{13}\text{C}$  NMR (150 MHz,  $\text{CDCl}_3$ )  $\delta$  161.3, 157.0, 148.7, 143.5, 137.6, 136.1, 133.2, 132.8, 132.0, 130.6, 128.7, 128.2, 127.9, 126.8, 124.4, 121.5, 108.2, 86.4, 42.5, 40.4, 21.4, 18.8. HRMS (ESI-TOF)  $m/z$ :  $[\text{M} + \text{H}]^+$  Calcd for  $\text{C}_{24}\text{H}_{22}\text{NO}^+$  340.1696, Found: 340.1696.

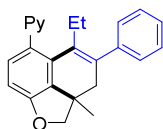

2-(5-ethyl-2a-methyl-4-phenyl-2a,3-dihydro-2H-naphtho[1,8-*bc*]furan-6-yl)pyridine (**25**). Brown oil (31.9 mg, 45%).  $^1\text{H}$  NMR (600 MHz,  $\text{CDCl}_3$ )  $\delta$  8.66 - 8.61 (m, 1H), 7.69 (td,  $J = 7.7, 1.8$  Hz, 1H), 7.43 (d,  $J = 7.8$  Hz, 1H), 7.34 (t,  $J = 7.6$  Hz, 2H), 7.27 - 7.18 (m, 4H), 7.11 (d,  $J = 8.1$  Hz, 1H), 6.76 (d,  $J = 8.1$  Hz, 1H), 4.55 (d,  $J = 8.2$  Hz, 1H), 4.26 (d,  $J = 8.2$  Hz, 1H), 2.88 (dd,  $J = 15.6, 2.4$  Hz, 1H), 2.51 (d,  $J = 15.6$  Hz, 1H), 2.23 - 2.17 (m, 1H), 1.51 - 1.44 (m, 1H), 1.40 (s, 3H), 0.51 (t,  $J = 7.4$  Hz, 3H).  $^{13}\text{C}$  NMR (150 MHz,  $\text{CDCl}_3$ )  $\delta$  161.2, 157.2, 148.9, 143.9, 137.0, 136.1, 135.0, 134.4, 132.0, 131.0, 130.6, 128.5, 128.3, 126.7, 124.2, 121.5, 108.3, 86.4, 42.8, 40.5, 22.8, 21.1, 13.7. HRMS (ESI-TOF)  $m/z$ :  $[\text{M} + \text{H}]^+$  Calcd for  $\text{C}_{25}\text{H}_{24}\text{NO}^+$  354.1852, Found: 354.1851. The structure of **25** is established with NOESY studies; intramolecular NOEs between alkyl  $\text{CH}_3$  ( $\delta = 0.51$  ppm) and the aryl CH ( $\delta = 8.66 - 8.61$  ppm) was observed.

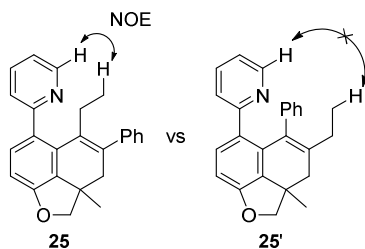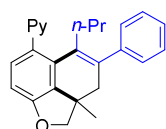

2-(2a-methyl-4-phenyl-5-propyl-2a,3-dihydro-2H-naphtho[1,8-*bc*]furan-6-yl)pyridine (**26**). Brown oil (23.5 mg, 32%).  $^1\text{H}$  NMR (600 MHz,  $\text{CDCl}_3$ )  $\delta$  8.65 (d,  $J = 4.1$  Hz, 1H), 7.74 - 7.69 (m, 1H), 7.42 (d,  $J = 7.7$  Hz, 1H), 7.34 (t,  $J = 7.6$  Hz, 2H), 7.27 - 7.19 (m, 4H), 7.08 (d,  $J = 8.1$  Hz, 1H), 6.76 (d,  $J = 8.1$  Hz, 1H), 4.55 (d,  $J = 8.1$  Hz, 1H), 4.27 (d,  $J = 8.2$  Hz, 1H), 2.88 (dd,  $J = 15.7, 2.6$  Hz, 1H), 2.52 (d,  $J = 15.7$  Hz, 1H), 2.12 - 2.07 (m, 1H), 1.41 (s, 3H), 1.10 - 1.02 (m, 1H), 0.97 - 0.78 (m, 2H), 0.32 (t,  $J = 7.3$  Hz, 3H).  $^{13}\text{C}$  NMR (150 MHz,  $\text{CDCl}_3$ )  $\delta$  161.3, 157.3, 148.8, 144.0, 137.6, 136.2, 134.2, 133.4, 132.0, 131.3, 130.6, 128.6, 128.3, 126.6, 124.4, 121.6, 108.2, 86.5, 43.0, 40.5, 31.8, 22.2, 21.2, 13.8. HRMS (ESI-TOF)  $m/z$ :  $[\text{M} + \text{H}]^+$  Calcd for  $\text{C}_{26}\text{H}_{26}\text{NO}^+$  368.2009, Found: 368.2009.

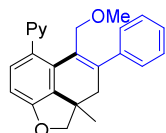

2-(5-(methoxymethyl)-2a-methyl-4-phenyl-2a,3-dihydro-2H-naphtho[1,8-*bc*]furan-6-yl)pyridine (**27**). Brown oil (29.6 mg, 40%).  $^1\text{H}$  NMR (600 MHz,  $\text{CDCl}_3$ )  $\delta$  8.65 - 8.60 (m, 1H), 7.75 (td,  $J = 7.7, 1.8$  Hz, 1H), 7.52 (d,  $J = 7.8$  Hz, 1H), 7.36 (t,  $J = 7.5$  Hz, 2H), 7.30 - 7.27 (m, 1H), 7.26 - 7.24 (m, 2H), 7.23 - 7.20 (m, 1H), 7.07 (d,  $J = 8.1$  Hz, 1H), 6.76 (d,  $J = 8.1$  Hz, 1H), 4.57 (d,  $J = 8.1$  Hz, 1H), 4.28 (d,  $J = 8.2$  Hz, 1H), 3.78 (d,  $J = 11.5$  Hz, 1H), 3.63 (dd,  $J = 11.5, 2.9$  Hz, 1H), 2.91 (dd,  $J = 15.9, 2.6$  Hz, 1H), 2.63 (d,  $J = 15.9$  Hz, 1H), 2.54 (s, 3H), 1.45 (s, 3H).  $^{13}\text{C}$  NMR (150 MHz,  $\text{CDCl}_3$ )  $\delta$  161.7, 157.2, 148.1, 142.5, 140.7, 136.2, 133.8, 132.2, 131.2, 130.4, 129.7, 128.6, 128.2, 127.4, 124.4, 121.3, 108.4, 86.4, 69.3, 57.3, 42.9, 40.3, 21.3. HRMS (ESI-TOF)  $m/z$ :  $[\text{M} + \text{H}]^+$  Calcd for  $\text{C}_{25}\text{H}_{24}\text{NO}_2^+$  370.1802, Found: 370.1796.

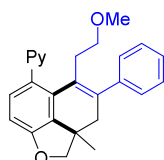

2-(5-(2-methoxyethyl)-2a-methyl-4-phenyl-2a,3-dihydro-2H-naphtho[1,8-*bc*]furan-6-yl)pyridine (**28**). Yellow oil (26.9 mg, 35%).  $^1\text{H}$  NMR (600 MHz,  $\text{CDCl}_3$ )  $\delta$  8.70 - 8.66 (m, 1H), 7.74 (td,  $J = 7.7, 1.8$  Hz, 1H), 7.45 (d,  $J = 7.8$  Hz, 1H), 7.39 - 7.36 (m, 2H), 7.28 (d,  $J = 8.2$  Hz, 3H), 7.26 - 7.22 (m, 1H), 7.15 (d,  $J = 8.1$  Hz, 1H), 6.80 (d,  $J = 8.1$  Hz, 1H), 4.59 (d,  $J = 8.2$  Hz, 1H), 4.30 (d,  $J = 8.2$  Hz, 1H), 3.05 - 2.96 (m, 2H), 2.95 - 2.88 (m, 4H), 2.62 - 2.52 (m, 2H), 1.82 - 1.77 (m, 1H), 1.44 (s, 3H).  $^{13}\text{C}$  NMR (150 MHz,  $\text{CDCl}_3$ )  $\delta$  160.9, 157.3, 149.1, 143.5, 139.8, 136.3, 134.3, 132.1, 131.0, 130.5, 129.6, 128.6, 128.3, 126.9, 124.2, 121.7, 108.5, 86.4, 71.1, 58.0, 43.1, 40.6, 29.8, 21.0. HRMS (ESI-TOF)  $m/z$ :  $[\text{M} + \text{H}]^+$  Calcd for  $\text{C}_{26}\text{H}_{26}\text{NO}_2^+$  384.1958, Found: 384.1957.

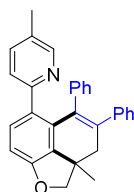

5-methyl-2-(2a-methyl-4,5-diphenyl-2a,3-dihydro-2H-naphtho[1,8-*bc*]furan-6-yl)pyridine (**29**). Yellow solid (59.9 mg, 72%, m.p. 129 - 130  $^\circ\text{C}$ ).  $^1\text{H}$  NMR (400 MHz,  $\text{CDCl}_3$ )  $\delta$  7.96 (s, 1H), 7.15 - 7.02 (m, 4H), 6.94 - 6.86 (m, 3H), 6.81 (d,  $J = 8.2$  Hz, 1H), 6.74 - 6.63 (m, 6H), 4.57 (d,  $J = 8.2$  Hz, 1H), 4.36 (d,  $J = 8.2$  Hz, 1H), 3.31 (d,  $J = 14.6$  Hz, 1H), 2.61 (d,  $J = 14.6$  Hz, 1H), 2.07 (s, 3H), 1.42 (s, 3H).  $^{13}\text{C}$  NMR (100 MHz,  $\text{CDCl}_3$ )  $\delta$  156.9, 156.4, 148.6, 144.4, 139.0, 138.6, 135.3, 134.3, 133.9, 132.3, 131.54, 131.45, 131.1, 129.2,

128.4, 127.9, 126.8, 126.1, 125.3, 124.1, 109.1, 86.5, 43.2, 40.8, 21.2, 17.9. HRMS (ESI-TOF)  $m/z$ :  $[M + H]^+$  Calcd for  $C_{30}H_{26}NO^+$  416.2009, Found: 416.2008.

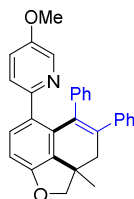

5-methoxy-2-(2a-methyl-4,5-diphenyl-2a,3-dihydro-2*H*-naphtho[1,8-*bc*]furan-6-yl)pyridine (**30**). Yellow solid (58.8 mg, 68%, m.p. 99 - 100 °C).  $^1H$  NMR (600 MHz,  $CDCl_3$ )  $\delta$  7.84 (d,  $J = 2.8$  Hz, 1H), 7.14 - 7.07 (m, 3H), 7.07 - 7.02 (m, 1H), 6.93 - 6.89 (m, 2H), 6.80 (d,  $J = 8.1$  Hz, 1H), 6.74 - 6.71 (m, 6H), 6.63 (dd,  $J = 8.5, 2.9$  Hz, 1H), 4.57 (d,  $J = 8.1$  Hz, 1H), 4.36 (d,  $J = 8.1$  Hz, 1H), 3.68 (s, 3H), 3.30 (d,  $J = 14.5$  Hz, 1H), 2.61 (d,  $J = 14.5$  Hz, 1H), 1.42 (s, 3H).  $^{13}C$  NMR (150 MHz,  $CDCl_3$ )  $\delta$  156.8, 153.0, 151.9, 144.4, 139.0, 138.7, 135.7, 134.3, 133.9, 132.3, 131.4, 131.2, 131.0, 128.5, 127.9, 126.9, 126.1, 125.6, 124.8, 120.0, 109.1, 86.6, 55.7, 43.2, 40.8, 21.3. HRMS (ESI-TOF)  $m/z$ :  $[M + H]^+$  Calcd for  $C_{30}H_{26}NO_2^+$  432.1958, Found: 432.1958.

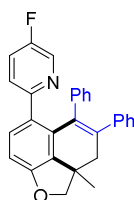

5-fluoro-2-(2a-methyl-4,5-diphenyl-2a,3-dihydro-2*H*-naphtho[1,8-*bc*]furan-6-yl)pyridine (**31**). Yellow solid (50.4 mg, 60%, m.p. 126 - 127 °C).  $^1H$  NMR (400 MHz,  $CDCl_3$ )  $\delta$  7.99 (d,  $J = 1.5$  Hz, 1H), 7.15 - 7.02 (m, 4H), 6.94 - 6.89 (m, 2H), 6.84 - 6.67 (m, 8H), 4.59 (d,  $J = 8.2$  Hz, 1H), 4.37 (d,  $J = 8.2$  Hz, 1H), 3.31 (d,  $J = 14.7$  Hz, 1H), 2.62 (d,  $J = 14.7$  Hz, 1H), 1.43 (s, 3H).  $^{13}C$  NMR (100 MHz,  $CDCl_3$ )  $\delta$  157.2, 157.2, 155.5, 144.1, 139.0, 138.8, 136.2 (d,  $J = 23.4$  Hz, 1C), 134.0, 134.0, 132.4, 131.5, 131.0, 130.4, 128.4, 128.0, 127.1, 126.2, 125.9, 125.4 (d,  $J = 3.9$  Hz, 1H), 121.5 (d,  $J = 18.7$  Hz, 1H), 109.2, 86.6, 43.1, 40.8, 21.3.  $^{19}F$  NMR (376 MHz,  $CDCl_3$ )  $\delta$  -132.1. HRMS (ESI-TOF)  $m/z$ :  $[M + H]^+$  Calcd for  $C_{29}H_{23}FNO^+$  420.1758, Found: 420.1756.

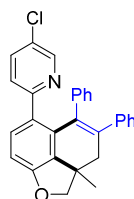

5-chloro-2-(2a-methyl-4,5-diphenyl-2a,3-dihydro-2*H*-naphtho[1,8-*bc*]furan-6-yl)pyridine (**32**). Yellow solid (44.5 mg, 51%, m.p. 192 - 193 °C).  $^1H$  NMR (600 MHz,  $CDCl_3$ )  $\delta$  8.07 (d,  $J = 2.1$  Hz, 1H), 7.13 - 7.09 (m, 3H), 7.08 - 7.03 (m, 2H), 6.93 - 6.89 (m, 2H), 6.81 (dd,  $J = 15.4, 7.7$  Hz, 2H), 6.75 - 6.65 (m, 5H), 4.59 (d,  $J = 8.1$  Hz, 1H), 4.37 (d,  $J = 8.2$  Hz, 1H), 3.30 (d,  $J = 14.6$  Hz, 1H), 2.62 (d,  $J = 14.6$  Hz, 1H), 1.42 (s, 3H).  $^{13}C$  NMR (150 MHz,  $CDCl_3$ )  $\delta$  157.5, 157.4, 147.1, 144.2, 139.1, 138.9, 134.3, 134.1, 133.9, 132.4, 131.6, 131.2, 130.2, 128.7, 128.5, 128.0, 127.2, 126.3, 125.8, 125.3, 109.3, 86.7, 43.2, 40.8, 21.3. HRMS (ESI-TOF)  $m/z$ :  $[M + H]^+$  Calcd for  $C_{29}H_{23}ClNO^+$  436.1463, Found: 436.1464.

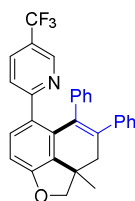

2-(2a-methyl-4,5-diphenyl-2a,3-dihydro-2*H*-naphtho[1,8-*bc*]furan-6-yl)-5-(trifluoromethyl)pyridine (**33**). Yellow solid (34.8 mg, 37%, m.p. 146 - 147 °C).  $^1H$  NMR (600 MHz,  $CDCl_3$ )  $\delta$  8.38 (s, 1H), 7.32 - 7.28 (m, 1H), 7.16 (d,  $J = 8.2$  Hz, 1H), 7.13 - 7.09 (m, 2H), 7.08 - 7.05 (m, 1H), 6.94 - 6.89 (m, 3H), 6.84 (d,  $J = 8.2$  Hz, 1H), 6.75 - 6.65 (m, 5H), 4.60 (d,  $J = 8.2$  Hz, 1H), 4.38 (d,  $J = 8.2$  Hz, 1H), 3.33 (d,  $J = 14.6$  Hz, 1H), 2.64 (d,  $J = 14.6$  Hz, 1H), 1.42 (s, 3H).  $^{13}C$  NMR (150 MHz,  $CDCl_3$ )  $\delta$  162.9, 157.7, 145.3 (q,  $J = 4.2$  Hz, 1C), 144.0, 139.3, 138.7, 134.3, 133.7, 132.5, 131.8, 131.6 (q,  $J = 3.2$  Hz, 1C), 131.22, 130.1, 128.4, 128.1, 127.2, 126.4, 126.2, 124.3, 123.8 (q,  $J = 272.1$  Hz, 1C), 122.8 (q,  $J = 32.8$  Hz, 1C), 109.4, 86.7, 43.1, 40.7, 21.3.  $^{19}F$  NMR (565 MHz,  $CDCl_3$ )  $\delta$  -62.7. HRMS (ESI-TOF)  $m/z$ :  $[M + H]^+$  Calcd for  $C_{30}H_{23}F_3NO^+$  470.1726, Found: 470.1725.



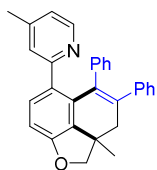

4-methyl-2-(2a-methyl-4,5-diphenyl-2a,3-dihydro-2*H*-naphtho[1,8-*bc*]furan-6-yl)pyridine (**34**). Yellow solid (49.9 mg, 60%, m.p. 170 - 171 °C). <sup>1</sup>H NMR (400 MHz, CDCl<sub>3</sub>) δ 8.06 (d, *J* = 5.0 Hz, 1H), 7.17 (d, *J* = 8.2 Hz, 1H), 7.13 - 7.02 (m, 3H), 6.95 - 6.90 (m, 2H), 6.81 (d, *J* = 8.2 Hz, 1H), 6.70 - 6.69 (m, 5H), 6.55 (s, 1H), 6.52 (d, *J* = 5.1 Hz, 1H), 4.58 (d, *J* = 8.2 Hz, 1H), 4.36 (d, *J* = 8.2 Hz, 1H), 3.30 (d, *J* = 14.6 Hz, 1H), 2.62 (d, *J* = 14.6 Hz, 1H), 2.00 (s, 3H), 1.41 (s, 3H). <sup>13</sup>C NMR (100 MHz, CDCl<sub>3</sub>) δ 158.5, 157.0, 148.1, 145.4, 144.3, 138.9, 138.6, 134.2, 133.9, 132.5, 131.5, 131.3, 130.8, 128.5, 128.0, 126.8, 126.3, 126.1, 125.8, 121.4, 109.2, 86.6, 43.2, 40.8, 21.2, 20.7. HRMS (ESI-TOF) *m/z*: [M + H]<sup>+</sup> Calcd for C<sub>30</sub>H<sub>26</sub>NO<sup>+</sup> 416.2009, Found: 416.2008.

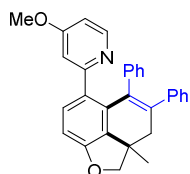

4-methoxy-2-(2a-methyl-4,5-diphenyl-2a,3-dihydro-2*H*-naphtho[1,8-*bc*]furan-6-yl)pyridine (**35**). Yellow solid (70.0 mg, 81%, m.p. 152 - 153 °C). <sup>1</sup>H NMR (600 MHz, CDCl<sub>3</sub>) δ 8.01 (d, *J* = 5.6 Hz, 1H), 7.15 (d, *J* = 8.0 Hz, 1H), 7.09 (t, *J* = 7.3 Hz, 2H), 7.07 - 7.02 (m, 1H), 6.94 - 6.89 (m, 2H), 6.81 (d, *J* = 8.2 Hz, 1H), 6.72 (s, 5H), 6.31 - 6.24 (m, 2H), 4.58 (d, *J* = 8.1 Hz, 1H), 4.36 (d, *J* = 8.2 Hz, 1H), 3.62 (s, 3H), 3.30 (d, *J* = 14.6 Hz, 1H), 2.61 (d, *J* = 14.5 Hz, 1H), 1.42 (s, 3H). <sup>13</sup>C NMR (150 MHz, CDCl<sub>3</sub>) δ 164.4, 160.6, 157.1, 149.4, 144.2, 138.9, 138.7, 134.2, 133.8, 132.3, 131.4, 131.4, 130.9, 128.4, 127.9, 126.9, 126.2, 125.8, 110.7, 109.1, 107.3, 86.6, 54.8, 43.2, 40.8, 21.3. HRMS (ESI-TOF) *m/z*: [M + H]<sup>+</sup> Calcd for C<sub>30</sub>H<sub>26</sub>NO<sub>2</sub><sup>+</sup> 432.1958, Found: 432.1957.

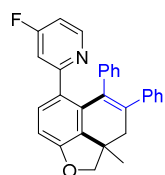

4-fluoro-2-(2a-methyl-4,5-diphenyl-2a,3-dihydro-2*H*-naphtho[1,8-*bc*]furan-6-yl)pyridine (**36**). Yellow solid (30.2 mg, 36%, m.p. 143 - 144 °C). <sup>1</sup>H NMR (600 MHz, CDCl<sub>3</sub>) δ 8.12 (dd, *J* = 8.6, 5.7 Hz, 1H), 7.15 (d, *J* = 8.2 Hz, 1H), 7.11 (t, *J* = 7.3 Hz, 2H), 7.06 (t, *J* = 7.2 Hz, 1H), 6.92 (d, *J* = 7.2 Hz, 2H), 6.82 (d, *J* = 8.2 Hz, 1H), 6.74 (s, 5H), 6.52 (d, *J* = 8.7 Hz, 1H), 6.46 - 6.44 (m, 1H), 4.59 (d, *J* = 8.1 Hz, 1H), 4.37 (d, *J* = 8.2 Hz, 1H), 3.31 (d, *J* = 14.5 Hz, 1H), 2.63 (d, *J* = 14.5 Hz, 1H), 1.42 (s, 3H). <sup>13</sup>C NMR (150 MHz, CDCl<sub>3</sub>) δ 167.4 (d, *J* = 261.1 Hz, 1C), 162.3 (d, *J* = 6.1 Hz, 1C), 157.4, 150.7 (d, *J* = 7.5 Hz, 1C), 144.1, 139.1, 138.8, 134.2, 133.9, 132.4, 131.6, 130.9, 130.4 (d, *J* = 3.0 Hz, 1C), 128.4, 128.0, 127.1, 126.3, 126.1, 112.5 (d, *J* = 17.1 Hz, 1C), 109.3, 108.4 (d, *J* = 16.5 Hz, 1C), 86.6, 43.1, 40.8, 21.2. <sup>19</sup>F NMR (565 MHz, CDCl<sub>3</sub>) δ -105.1. HRMS (ESI-TOF) *m/z*: [M + H]<sup>+</sup> Calcd for C<sub>29</sub>H<sub>23</sub>FNO<sup>+</sup> 420.1758, Found: 420.1755.

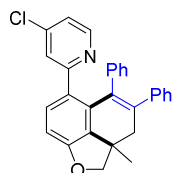

4-chloro-2-(2a-methyl-4,5-diphenyl-2a,3-dihydro-2*H*-naphtho[1,8-*bc*]furan-6-yl)pyridine (**37**). White solid (34.0 mg, 39%, m.p. 176 - 177 °C). <sup>1</sup>H NMR (600 MHz, CDCl<sub>3</sub>) δ 8.06 (d, *J* = 5.3 Hz, 1H), 7.16 (d, *J* = 8.1 Hz, 1H), 7.11 (t, *J* = 7.4 Hz, 2H), 7.07 (t, *J* = 7.2 Hz, 1H), 6.93 (d, *J* = 7.4 Hz, 2H), 6.82 (d, *J* = 8.2 Hz, 1H), 6.80 - 6.68 (m, 7H), 4.59 (d, *J* = 8.1 Hz, 1H), 4.37 (d, *J* = 8.2 Hz, 1H), 3.31 (d, *J* = 14.5 Hz, 1H), 2.63 (d, *J* = 14.5 Hz, 1H), 1.41 (s, 3H). <sup>13</sup>C NMR (150 MHz, CDCl<sub>3</sub>) δ 160.5, 157.4, 149.3, 144.1, 142.5, 139.1, 138.7, 134.2, 133.9, 132.5, 131.5, 130.8, 130.2, 128.5, 128.0, 127.2, 126.3, 126.1, 125.5, 120.7, 109.4, 86.7, 43.1, 40.8, 21.2. HRMS (ESI-TOF) *m/z*: [M + H]<sup>+</sup> Calcd for C<sub>29</sub>H<sub>23</sub>ClNO<sup>+</sup> 436.1463, Found: 436.1462.

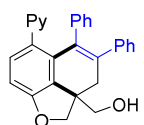
 (4,5-diphenyl-6-(pyridin-2-yl)-2*H*-naphtho[1,8-*bc*]furan-2a(3*H*)-yl)methanol (**38**). Yellow solid (37.6 mg, 45%, m.p. 105 - 106 °C). <sup>1</sup>H NMR (600 MHz, DMSO-*d*<sub>6</sub>) δ 8.08 (d, *J* = 4.4 Hz, 1H), 7.17 (td, *J* = 7.7, 1.6 Hz, 1H), 7.10 (t, *J* = 7.4 Hz, 2H), 7.07 - 7.03 (m, 2H), 6.91 (d, *J* = 7.1 Hz, 2H), 6.82 - 6.76 (m, 3H), 6.70 - 6.63 (m, 3H), 6.60 (d, *J* = 6.6 Hz, 2H), 5.09 (t, *J* = 5.4 Hz, 1H), 4.94 (d, *J* = 8.5 Hz, 1H), 4.27 (d, *J* = 8.4 Hz, 1H), 3.70 - 3.64 (m, 1H), 3.53 (dd, *J* = 10.6, 4.8 Hz, 1H), 3.15 (d, *J* = 15.2 Hz, 1H), 2.87 (d, *J* = 15.2 Hz, 1H). <sup>13</sup>C NMR (150 MHz, DMSO-*d*<sub>6</sub>) δ 158.8, 157.9, 148.4, 144.1, 138.9, 138.8, 135.1, 134.3, 133.2, 132.5, 131.7, 130.9, 130.5, 128.6, 128.2, 127.0, 126.5, 125.9, 124.6, 120.6, 109.0, 82.3, 60.6, 46.3, 37.7. HRMS (ESI-TOF) *m/z*: [M + H]<sup>+</sup> Calcd for C<sub>29</sub>H<sub>24</sub>NO<sub>2</sub><sup>+</sup> 418.1802, Found: 418.1808.

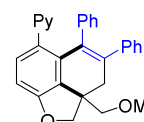
 2-(2a-(methoxymethyl)-4,5-diphenyl-2a,3-dihydro-2*H*-naphtho[1,8-*bc*]furan-6-yl)pyridine (**39**). Yellow solid (58.8 mg, 68%, m.p. 106 - 107 °C). <sup>1</sup>H NMR (400 MHz, CDCl<sub>3</sub>) δ 8.16 (dd, *J* = 4.8, 0.6 Hz, 1H), 7.16 (d, *J* = 8.2 Hz, 1H), 7.13 - 7.02 (m, 4H), 6.93 - 6.88 (m, 2H), 6.81 (t, *J* = 7.4 Hz, 2H), 6.74 - 6.63 (m, 7H), 4.96 (d, *J* = 8.5 Hz, 1H), 4.29 (dd, *J* = 8.5, 1.4 Hz, 1H), 3.64 (dd, *J* = 9.1, 1.4 Hz, 1H), 3.53 (d, *J* = 9.3 Hz, 1H), 3.26 (s, 3H), 3.18 (d, *J* = 14.9 Hz, 1H), 2.98 (d, *J* = 14.9 Hz, 1H). <sup>13</sup>C NMR (100 MHz, CDCl<sub>3</sub>) δ 159.1, 158.1, 148.4, 143.9, 138.72, 138.66, 134.8, 134.5, 133.3, 132.4, 131.6, 131.0, 129.7, 128.4, 127.9, 127.0, 126.2, 125.8, 124.7, 120.2, 109.3, 82.9, 71.7, 59.5, 45.3, 38.0. HRMS (ESI-TOF) *m/z*: [M + H]<sup>+</sup> Calcd for C<sub>30</sub>H<sub>26</sub>NO<sub>2</sub><sup>+</sup> 432.1958, Found: 432.1955.

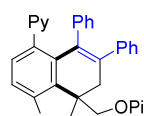
 (4,5-diphenyl-6-(pyridin-2-yl)-2*H*-naphtho[1,8-*bc*]furan-2a(3*H*)-yl)methyl pivalate (**40**). White solid (67.3 mg, 67%, m.p. 183 - 184 °C). <sup>1</sup>H NMR (400 MHz, CDCl<sub>3</sub>) δ 8.15 (d, *J* = 4.3 Hz, 1H), 7.19 (d, *J* = 8.2 Hz, 1H), 7.12 (td, *J* = 7.7, 1.7 Hz, 1H), 7.08 - 6.99 (m, 3H), 6.90 - 6.86 (m, 2H), 6.83 (d, *J* = 8.2 Hz, 2H), 6.74 - 6.63 (m, 6H), 4.85 (d, *J* = 8.6 Hz, 1H), 4.35 (d, *J* = 10.4 Hz, 2H), 4.25 (d, *J* = 11.1 Hz, 1H), 3.28 (d, *J* = 14.8 Hz, 1H), 2.86 (d, *J* = 14.8 Hz, 1H), 0.99 (s, 9H). <sup>13</sup>C NMR (100 MHz, CDCl<sub>3</sub>) δ 178.3, 158.9, 158.1, 148.5, 143.5, 138.4, 138.0, 134.9, 133.6, 132.5, 131.9, 130.9, 128.8, 128.4, 127.9, 127.0, 126.3, 126.0, 124.6, 120.3, 109.5, 82.7, 63.2, 44.3, 38.9, 38.5, 27.0. HRMS (ESI-TOF) *m/z*: [M + H]<sup>+</sup> Calcd for C<sub>34</sub>H<sub>32</sub>NO<sub>3</sub><sup>+</sup> 502.2377, Found: 502.2378.

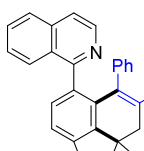
 1-(2a-methyl-4,5-diphenyl-2a,3-dihydro-2*H*-naphtho[1,8-*bc*]furan-6-yl)isoquinoline (**41**). Brown solid (44.2 mg, 49%, dr = 1.1:1, m.p. 83 - 84 °C). <sup>1</sup>H NMR (600 MHz, CDCl<sub>3</sub>) δ 8.21 (d, *J* = 5.7 Hz, 1H), 8.13 (d, *J* = 5.7 Hz, 1H), 7.85 (d, *J* = 8.4 Hz, 1H), 7.60 - 7.38 (m, 7H), 7.37 - 7.34 (m, 1H), 7.25 (d, *J* = 8.1 Hz, 1H), 7.12 (d, *J* = 5.7 Hz, 1H), 7.08 (d, *J* = 5.7 Hz, 1H), 7.06 - 6.95 (m, 7H), 6.91 (d, *J* = 8.1 Hz, 1H), 6.86 - 6.80 (m, 5H), 6.67 - 6.41 (m, 4H), 6.38 - 5.97 (m, 5H), 4.63 (t, *J* = 8.3 Hz, 2H), 4.47 (d, *J* = 8.2 Hz, 1H), 4.39 (d, *J* = 8.2 Hz, 1H), 3.37 (d, *J* = 6.4 Hz, 1H), 3.34 (d, *J* = 6.6 Hz, 1H), 2.66 (d, *J* = 14.6 Hz, 1H), 2.61 (d, *J* = 14.7 Hz, 1H), 1.51 (s, 3H), 1.42 (s, 3H). <sup>13</sup>C NMR (150 MHz, CDCl<sub>3</sub>) δ 161.2, 160.8, 157.30, 157.28, 144.0, 143.8, 141.6, 141.3, 138.5, 138.4, 138.3, 137.0, 136.1, 135.4, 134.6, 134.3, 133.9, 133.6, 132.9, 132.8, 131.99, 131.95, 130.1, 129.5, 129.3, 129.1, 128.3, 128.22, 128.20, 128.18, 127.8, 127.73, 127.71, 127.66, 126.5, 126.4, 126.3, 126.2, 126.1, 126.0, 125.5, 124.8, 119.1, 109.7, 108.5, 86.8, 86.6, 43.4.

43.1, 40.7, 21.6, 21.3. HRMS (ESI-TOF)  $m/z$ :  $[M + H]^+$  Calcd for  $C_{33}H_{26}NO^+$  452.2009, Found: 452.2007.

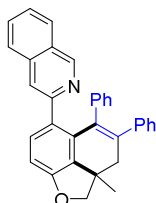

3-(2a-methyl-4,5-diphenyl-2a,3-dihydro-2H-naphtho[1,8-*bc*]furan-6-yl)isoquinoline (**42**). Brown solid (44.3 mg, 49%, m.p. 115 - 116 °C).  $^1H$  NMR (600 MHz,  $CDCl_3$ )  $\delta$  8.78 (s, 1H), 7.70 (d,  $J = 8.1$  Hz, 1H), 7.52 - 7.46 (m, 2H), 7.43 - 7.40 (m, 1H), 7.28 (d,  $J = 8.1$  Hz, 1H), 7.15 (s, 1H), 7.08 (t,  $J = 7.3$  Hz, 2H), 7.05 - 7.01 (m, 1H), 6.95 - 6.91 (m, 2H), 6.86 (d,  $J = 8.1$  Hz, 1H), 6.70 (d,  $J = 6.7$  Hz, 2H), 6.40 (t,  $J = 7.2$  Hz, 2H), 6.23 (t,  $J = 7.4$  Hz, 1H), 4.60 (d,  $J = 8.1$  Hz, 1H), 4.40 (d,  $J = 8.2$  Hz, 1H), 3.36 (d,  $J = 14.4$  Hz, 1H), 2.64 (d,  $J = 14.4$  Hz, 1H), 1.45 (s, 3H).  $^{13}C$  NMR (150 MHz,  $CDCl_3$ )  $\delta$  156.9, 152.5, 151.1, 144.3, 138.9, 138.6, 135.3, 134.4, 134.0, 132.8, 131.7, 131.6, 130.7, 129.7, 128.5, 127.9, 127.1, 126.5, 126.3, 126.3, 126.1, 125.1, 121.1, 109.2, 86.6, 43.2, 40.9, 21.3. HRMS (ESI-TOF)  $m/z$ :  $[M + H]^+$  Calcd for  $C_{33}H_{26}NO^+$  452.2009, Found: 452.2009.

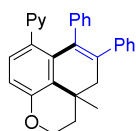

2-(3a-methyl-5,6-diphenyl-2,3,3a,4-tetrahydrobenzo[*de*]chromen-7-yl)pyridine (**43**). White solid (55.7 mg, 67%, m.p. 67 - 68 °C).  $^1H$  NMR (600 MHz,  $CDCl_3$ )  $\delta$  8.21 (dd,  $J = 4.8, 0.7$  Hz, 1H), 7.15 (td,  $J = 7.7, 1.8$  Hz, 1H), 7.11 - 7.02 (m, 4H), 6.93 - 6.88 (m, 2H), 6.84 - 6.80 (m, 2H), 6.74 - 6.66 (m, 4H), 6.62 - 6.57 (m, 2H), 4.49 - 4.38 (m, 2H), 3.07 (d,  $J = 14.3$  Hz, 1H), 2.38 (d,  $J = 14.3$  Hz, 1H), 2.04 (td,  $J = 12.9, 5.4$  Hz, 1H), 1.83 (dd,  $J = 11.4, 1.9$  Hz, 1H), 1.41 (s, 3H).  $^{13}C$  NMR (150 MHz,  $CDCl_3$ )  $\delta$  160.9, 151.7, 148.2, 143.9, 140.7, 137.4, 135.8, 135.1, 134.6, 132.9, 130.9, 130.7, 128.4, 127.8, 126.8, 126.5, 126.0, 125.3, 124.9, 120.2, 115.7, 62.7, 45.7, 35.5, 30.8, 23.4. HRMS (ESI-TOF)  $m/z$ :  $[M + H]^+$  Calcd for  $C_{30}H_{26}NO^+$  416.2009, Found: 416.2011.

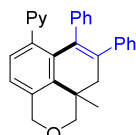

2-(9a-methyl-7,8-diphenyl-9,9a-dihydro-1H,3H-benzo[*de*]isochromen-6-yl)pyridine (**44**). Brown solid (42.4 mg, 51%, m.p. 110 - 111 °C).  $^1H$  NMR (600 MHz,  $CDCl_3$ )  $\delta$  8.24 (d,  $J = 4.4$  Hz, 1H), 7.22 - 6.97 (m, 6H), 6.90 (d,  $J = 7.3$  Hz, 2H), 6.83 (d,  $J = 7.4$  Hz, 1H), 6.77 - 6.62 (m, 6H), 5.04 (d,  $J = 15.4$  Hz, 1H), 4.88 (d,  $J = 15.4$  Hz, 1H), 3.90 (d,  $J = 10.5$  Hz, 1H), 3.60 (d,  $J = 10.5$  Hz, 1H), 2.92 (d,  $J = 14.1$  Hz, 1H), 2.20 (d,  $J = 14.1$  Hz, 1H), 1.44 (s, 3H).  $^{13}C$  NMR (150 MHz,  $CDCl_3$ )  $\delta$  160.8, 148.4, 143.8, 140.7, 138.7, 138.5, 137.1, 135.3, 134.6, 134.2, 131.7, 130.8, 129.6, 128.4, 127.8, 127.0, 126.1, 125.4, 124.8, 123.0, 120.6, 75.2, 67.7, 40.4, 33.7, 22.1. HRMS (ESI-TOF)  $m/z$ :  $[M + H]^+$  Calcd for  $C_{30}H_{26}NO^+$  416.2009, Found: 416.2010.

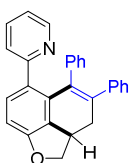

2-(4,5-diphenyl-2a,3-dihydro-2H-naphtho[1,8-*bc*]furan-6-yl)pyridine (**45**). Brown solid (16.3 mg, 21%, m.p. 79 - 80 °C).  $^1H$  NMR (600 MHz,  $CDCl_3$ )  $\delta$  8.17 (d,  $J = 4.6$  Hz, 1H), 7.17 (d,  $J = 8.2$  Hz, 1H), 7.13 (t,  $J = 7.6$  Hz, 1H), 7.07 (t,  $J = 7.2$  Hz, 2H), 7.05 - 7.01 (m, 1H), 6.93 (d,  $J = 7.4$  Hz, 2H), 6.84 (d,  $J = 7.8$  Hz, 1H), 6.80 (d,  $J = 8.2$  Hz, 1H), 6.72 (dd,  $J = 10.9, 6.8$  Hz, 3H), 6.70 - 6.63 (m, 3H), 4.91 (t,  $J = 8.6$  Hz, 1H), 4.27 (dd,  $J = 11.1, 8.7$  Hz, 1H), 3.90 - 3.77 (m, 1H), 3.08 (t,  $J = 14.8$  Hz, 1H), 2.74 (dd,  $J = 14.1, 5.9$  Hz, 1H).  $^{13}C$  NMR (150 MHz,  $CDCl_3$ )  $\delta$  158.4, 157.7, 147.5, 143.4, 139.3, 138.4, 135.4, 135.3, 132.6, 132.5, 131.1, 130.2, 130.1, 128.5, 127.7, 126.9, 126.1, 125.8, 124.8, 120.2, 108.8, 79.5, 37.1, 36.7. HRMS (ESI-TOF)  $m/z$ :  $[M + H]^+$  Calcd for  $C_{28}H_{22}NO^+$  388.1696, Found: 388.1693.

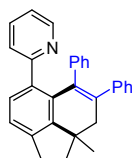

2-(8a-methyl-6,7-diphenyl-1,2,8,8a-tetrahydroacenaphthylen-5-yl)pyridine (46). Colorless solid (15.2 mg, 19%, m.p. 57 - 58 °C). <sup>1</sup>H NMR (400 MHz, CDCl<sub>3</sub>) δ 8.21 (s, 1H), 7.24 - 7.00 (m, 6H), 6.97 - 6.90 (m, 2H), 6.87 (s, 1H), 6.70 (d, *J* = 6.4 Hz, 6H), 3.28 - 3.13 (m, 2H), 2.93 (dd, *J* = 15.9, 8.1 Hz, 1H), 2.60 (d, *J* = 14.6 Hz, 1H), 2.17 (dd, *J* = 11.8, 6.8 Hz, 1H), 2.07 (dd, *J* = 11.3, 8.6 Hz, 1H), 1.31 (s, 3H). <sup>13</sup>C NMR (100 MHz, CDCl<sub>3</sub>) δ 160.0, 149.5, 148.2, 144.8, 140.6, 139.8, 139.2, 136.5, 134.9, 133.9, 131.5, 131.1, 130.8, 128.5, 127.7, 126.8, 125.8, 125.4, 124.9, 123.7, 120.3, 46.2, 43.2, 41.8, 30.9, 20.6. HRMS (ESI-TOF) *m/z*: [M + H]<sup>+</sup> Calcd for C<sub>30</sub>H<sub>26</sub>N<sup>+</sup> 400.2060, Found: 400.2059.

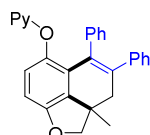

2-((2a-methyl-4,5-diphenyl-2a,3-dihydro-2H-naphtho[1,8-*bc*]furan-6-yl)oxy)pyridine (47). Yellow solid (63.5 mg, 76%, m.p. 126 - 127 °C). <sup>1</sup>H NMR (600 MHz, CDCl<sub>3</sub>) δ 7.96 (dd, *J* = 5.0, 1.6 Hz, 1H), 7.22 - 7.19 (m, 1H), 7.05 (t, *J* = 7.4 Hz, 2H), 7.02 - 6.98 (m, 1H), 6.95 - 6.63 (m, 10H), 5.91 (d, *J* = 8.3 Hz, 1H), 4.55 (d, *J* = 8.2 Hz, 1H), 4.40 (d, *J* = 8.2 Hz, 1H), 3.23 (d, *J* = 15.1 Hz, 1H), 2.57 (d, *J* = 15.1 Hz, 1H), 1.45 (s, 3H). <sup>13</sup>C NMR (150 MHz, CDCl<sub>3</sub>) δ 163.6, 154.2, 146.6, 143.5, 142.9, 139.1, 138.3, 138.2, 133.6, 132.3, 129.9, 128.2, 127.8, 126.9, 126.2, 126.0, 125.6, 124.1, 117.0, 110.7, 110.0, 87.0, 43.3, 40.6, 21.9. HRMS (ESI-TOF) *m/z*: [M + H]<sup>+</sup> Calcd for C<sub>29</sub>H<sub>24</sub>NO<sub>2</sub><sup>+</sup> 418.1802, Found: 418.1799.

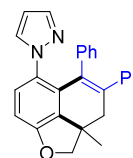

1-(2a-methyl-4,5-diphenyl-2a,3-dihydro-2H-naphtho[1,8-*bc*]furan-6-yl)-1H-pyrazole (48). Yellow solid (60.8 mg, 78%, m.p. 125 - 126 °C). <sup>1</sup>H NMR (400 MHz, CDCl<sub>3</sub>) δ 7.14 - 7.00 (m, 5H), 6.96 (d, *J* = 2.2 Hz, 1H), 6.90 - 6.68 (m, 8H), 5.66 (t, *J* = 2.0 Hz, 1H), 4.60 (d, *J* = 8.3 Hz, 1H), 4.39 (d, *J* = 8.3 Hz, 1H), 3.25 (d, *J* = 14.9 Hz, 1H), 2.61 (d, *J* = 14.9 Hz, 1H), 1.45 (s, 3H). <sup>13</sup>C NMR (100 MHz, CDCl<sub>3</sub>) δ 157.0, 143.7, 140.1, 139.5, 137.3, 134.1, 132.4, 131.3, 130.7, 129.8, 129.6, 128.8, 128.2, 127.9, 126.9, 126.3, 125.9, 109.5, 105.5, 87.0, 43.1, 40.7, 21.3. HRMS (ESI-TOF) *m/z*: [M + H]<sup>+</sup> Calcd for C<sub>27</sub>H<sub>23</sub>N<sub>2</sub>O<sup>+</sup> 391.1805, Found: 391.1806.

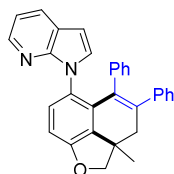

1-(2a-methyl-4,5-diphenyl-2a,3-dihydro-2H-naphtho[1,8-*bc*]furan-6-yl)-1H-pyrrolo[2,3-*b*]pyridine (49). Yellow solid (74.6 mg, 85%, dr = 1.1:1, m.p. 95 - 96 °C). <sup>1</sup>H NMR (600 MHz, CDCl<sub>3</sub>) δ 8.26 (d, *J* = 4.3 Hz, 1H), 8.18 (d, *J* = 4.3 Hz, 1H), 7.52 (t, *J* = 8.3 Hz, 2H), 7.02 (tdd, *J* = 11.7, 9.8, 5.9 Hz, 10H), 6.92 (dd, *J* = 7.7, 4.7 Hz, 1H), 6.89 - 6.75 (m, 11H), 6.58 (dd, *J* = 23.6, 16.3 Hz, 4H), 6.41 (dd, *J* = 27.2, 19.9 Hz, 4H), 5.96 (d, *J* = 3.5 Hz, 1H), 5.91 (d, *J* = 3.5 Hz, 1H), 4.61 (dd, *J* = 8.3, 1.4 Hz, 2H), 4.47 (d, *J* = 8.3 Hz, 1H), 4.43 (d, *J* = 8.3 Hz, 1H), 3.42 (d, *J* = 15.0 Hz, 1H), 3.26 (d, *J* = 14.8 Hz, 1H), 2.63 (d, *J* = 14.8 Hz, 1H), 2.58 (d, *J* = 15.0 Hz, 1H), 1.48 (s, 3H), 1.44 (s, 3H). <sup>13</sup>C NMR (150 MHz, CDCl<sub>3</sub>) δ 157.1, 156.9, 148.7, 148.3, 143.7, 143.6, 142.62, 142.55, 139.51, 139.48, 136.6, 136.4, 134.1, 133.8, 132.9, 132.6, 131.3, 130.54, 130.5, 130.3, 129.6, 128.17, 128.13, 128.0, 127.9, 127.7, 127.3, 127.1, 126.3, 126.1, 125.7, 125.6, 120.39, 120.38, 115.6, 115.5, 110.0, 109.7, 100.3, 99.7, 87.0, 86.9, 43.3, 42.9, 40.8, 40.5, 21.8, 21.4. HRMS (ESI-TOF) *m/z*: [M + H]<sup>+</sup> Calcd for C<sub>31</sub>H<sub>25</sub>N<sub>2</sub>O<sup>+</sup> 441.1961, Found: 441.1960.

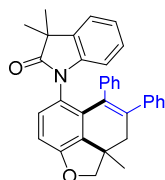

3,3-dimethyl-1-(2a-methyl-4,5-diphenyl-2a,3-dihydro-2H-naphtho[1,8-*bc*]furan-6-yl)indolin-2-one (50). White solid (23.7 mg, 24%, dr = 1.1:1, m.p. 208 - 209 °C). <sup>1</sup>H NMR (400 MHz, CDCl<sub>3</sub>) δ 7.08 - 7.02 (m, 5H), 6.96 - 6.49 (m, 10H), 6.38 (d, *J* =

7.7 Hz, 1H), 4.62 (d,  $J = 8.3$  Hz, 1H), 4.44 (d,  $J = 8.3$  Hz, 1H), 3.26 (d,  $J = 14.9$  Hz, 1H), 2.64 (d,  $J = 14.8$  Hz, 1H), 1.44 (s, 3H), 1.23 (s, 3H), 0.72 (s, 3H).  $^{13}\text{C}$  NMR (150 MHz,  $\text{CDCl}_3$ )  $\delta$  180.4, 156.9, 143.7, 143.4, 139.6, 137.6, 135.0, 134.4, 132.7, 131.0, 130.6, 129.7, 128.0, 127.9, 126.9, 126.8, 126.6, 126.2, 123.9, 122.2, 121.7, 111.0, 109.4, 86.9, 43.7, 43.4, 40.6, 26.3, 23.1, 21.2. HRMS (ESI-TOF)  $m/z$ :  $[\text{M} + \text{H}]^+$  Calcd for  $\text{C}_{34}\text{H}_{30}\text{NO}_2^+$  484.2271, Found: 484.2269.

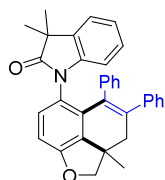

3,3-dimethyl-1-(2a-methyl-4,5-diphenyl-2a,3-dihydro-2H-naphtho[1,8-*bc*]furan-6-yl)indolin-2-one (**50'**). Yellow solid (19.7 mg, 21%, dr = 1.1:1, m.p. 122 - 123 °C).  $^1\text{H}$  NMR (600 MHz,  $\text{CDCl}_3$ )  $\delta$  7.13 (td,  $J = 7.7$ , 1.4 Hz, 1H), 7.10 - 7.02 (m, 3H), 6.97 - 6.79 (m, 8H), 6.75 - 6.68 (m, 2H), 6.64 - 6.59 (m, 2H), 4.59 (d,  $J = 8.2$  Hz, 1H), 4.41 (d,  $J = 8.3$  Hz, 1H), 3.32 (d,  $J = 14.7$  Hz, 1H), 2.58 (d,  $J = 14.7$  Hz, 1H), 1.45 (s, 3H), 1.18 (s, 3H), 0.75 (s, 3H).  $^{13}\text{C}$  NMR (150 MHz,  $\text{CDCl}_3$ )  $\delta$  180.6, 157.2, 143.9, 143.3, 139.4, 137.9, 135.7, 134.7, 132.5, 131.7, 129.8, 129.5, 128.3, 127.9, 127.0, 126.9, 126.20, 126.17, 124.2, 122.2, 121.7, 110.6, 110.3, 86.9, 43.7, 43.1, 40.7, 26.7, 23.2, 21.5. HRMS (ESI-TOF)  $m/z$ :  $[\text{M} + \text{H}]^+$  Calcd for  $\text{C}_{34}\text{H}_{30}\text{NO}_2^+$  484.2271, Found: 484.2249.

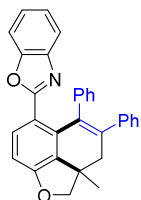

2-(2a-methyl-4,5-diphenyl-2a,3-dihydro-2H-naphtho[1,8-*bc*]furan-6-yl)benzo[*d*]oxazole (**51**). Yellow solid (39.7 mg, 45%, m.p. 196 - 197 °C).  $^1\text{H}$  NMR (600 MHz,  $\text{CDCl}_3$ )  $\delta$  7.53 (d,  $J = 8.2$  Hz, 1H), 7.42 (d,  $J = 7.6$  Hz, 1H), 7.16 - 7.05 (m, 6H), 6.95 (d,  $J = 7.5$  Hz, 2H), 6.87 - 6.85 (m, 3H), 6.63 (t,  $J = 7.4$  Hz, 2H), 6.41 (t,  $J = 7.4$  Hz, 1H), 4.63 (d,  $J = 8.2$  Hz, 1H), 4.40 (d,  $J = 8.2$  Hz, 1H), 3.31 (d,  $J = 14.5$  Hz, 1H), 2.66 (d,  $J = 14.5$  Hz, 1H), 1.43 (s, 3H).  $^{13}\text{C}$  NMR (150 MHz,  $\text{CDCl}_3$ )  $\delta$  163.5, 159.1, 150.5, 143.9, 141.6, 139.6, 138.0, 134.5, 133.57, 133.54, 133.3, 128.4, 128.1, 126.9, 126.5, 125.7, 124.0, 123.7, 119.5, 117.5, 110.2, 109.4, 86.9, 43.1, 40.5, 21.2. HRMS (ESI-TOF)  $m/z$ :  $[\text{M} + \text{H}]^+$  Calcd for  $\text{C}_{31}\text{H}_{24}\text{NO}_2^+$  442.1802, Found: 442.1803.

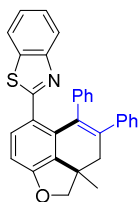

2-(2a-methyl-4,5-diphenyl-2a,3-dihydro-2H-naphtho[1,8-*bc*]furan-6-yl)benzo[*d*]thiazole (**52**). Yellow solid (29.2 mg, 32%, m.p. 226 - 227 °C).  $^1\text{H}$  NMR (600 MHz,  $\text{CDCl}_3$ )  $\delta$  7.61 (t,  $J = 7.2$  Hz, 2H), 7.30 (d,  $J = 8.2$  Hz, 1H), 7.28 - 7.25 (m, 1H), 7.22 - 7.17 (m, 1H), 7.10 (dd,  $J = 11.3$ , 4.4 Hz, 2H), 7.07 - 7.03 (m, 1H), 6.95 - 6.90 (m, 2H), 6.82 (dd,  $J = 7.5$ , 5.3 Hz, 3H), 6.55 (t,  $J = 7.1$  Hz, 2H), 6.37 (t,  $J = 7.4$  Hz, 1H), 4.62 (d,  $J = 8.2$  Hz, 1H), 4.38 (d,  $J = 8.2$  Hz, 1H), 3.33 (d,  $J = 14.6$  Hz, 1H), 2.64 (d,  $J = 14.5$  Hz, 1H), 1.45 (s, 3H).  $^{13}\text{C}$  NMR (150 MHz,  $\text{CDCl}_3$ )  $\delta$  167.6, 158.5, 153.1, 144.0, 139.7, 138.6, 135.8, 134.7, 133.9, 133.2, 133.1, 128.4, 128.0, 126.8, 126.3, 125.4, 125.3, 124.4, 124.0, 122.8, 121.0, 109.0, 86.8, 43.1, 40.6, 21.2. HRMS (ESI-TOF)  $m/z$ :  $[\text{M} + \text{H}]^+$  Calcd for  $\text{C}_{31}\text{H}_{24}\text{NOS}^+$  458.1573, Found: 458.1570.

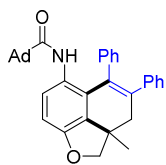

(3s)-*N*-(2a-methyl-4,5-diphenyl-2a,3-dihydro-2H-naphtho[1,8-*bc*]furan-6-yl)adamantane-1-carboxamide (**53**). White solid (40.1 mg, 40%, m.p. 227 - 228 °C).  $^1\text{H}$  NMR (600 MHz,  $\text{CDCl}_3$ )  $\delta$  7.63 (d,  $J = 8.7$  Hz, 1H), 7.51 - 7.29 (m, 2H), 7.21 (t,  $J = 7.4$  Hz, 1H), 7.16 - 7.01 (m, 4H), 6.93 - 6.79 (m, 3H), 6.75 (d,  $J = 8.7$  Hz, 1H), 6.69 (s, 1H), 4.50 (d,  $J = 8.2$  Hz, 1H), 4.28 (d,  $J = 8.2$  Hz, 1H), 3.14 (d,  $J = 14.8$  Hz, 1H), 2.53 (d,  $J = 14.8$  Hz, 1H), 1.82 (s, 3H), 1.58 (d,  $J = 12.2$  Hz, 3H), 1.48 (d,  $J = 11.5$  Hz, 3H), 1.39 (s, 3H), 1.33 (dd,  $J = 12.0$ , 2.0

Hz, 3H), 1.24 (dd,  $J = 12.0, 2.0$  Hz, 3H).  $^{13}\text{C}$  NMR (150 MHz,  $\text{CDCl}_3$ )  $\delta$  176.0, 154.1, 143.6, 140.1, 139.7, 133.3, 131.9, 129.1, 128.4, 128.1, 128.0, 127.5, 126.9, 126.3, 126.1, 124.7, 109.8, 86.5, 43.5, 41.1, 40.8, 38.1, 36.3, 28.0, 21.3. HRMS (ESI-TOF)  $m/z$ :  $[\text{M} + \text{H}]^+$  Calcd for  $\text{C}_{35}\text{H}_{36}\text{NO}_2^+$  502.2741, Found: 502.2737.

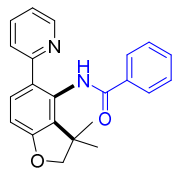

*N*-(3,3-dimethyl-5-(pyridin-2-yl)-2,3-dihydrobenzofuran-4-yl)benzamide (**54**). White solid (59.4 mg, 86%, m.p. 200 - 201 °C).  $^1\text{H}$  NMR (600 MHz,  $\text{CDCl}_3$ )  $\delta$  9.28 (s, 1H), 8.34 (d,  $J = 4.4$  Hz, 1H), 7.84 - 7.79 (m, 2H), 7.65 (td,  $J = 7.8, 1.7$  Hz, 1H), 7.51 - 7.48 (m, 2H), 7.42 (t,  $J = 7.6$  Hz, 2H), 7.33 (d,  $J = 8.2$  Hz, 1H), 7.10 - 7.03 (m, 1H), 6.85 (d,  $J = 8.2$  Hz, 1H), 4.24 (s, 2H), 1.44 (s, 6H).  $^{13}\text{C}$  NMR (150 MHz,  $\text{CDCl}_3$ )  $\delta$  167.6, 161.3, 158.4, 148.1, 137.2, 134.6, 133.8, 132.1, 131.7, 130.8, 130.7, 128.7, 127.4, 124.0, 121.6, 109.6, 85.4, 43.4, 25.8. HRMS (ESI-TOF)  $m/z$ :  $[\text{M} + \text{H}]^+$  Calcd for  $\text{C}_{22}\text{H}_{21}\text{N}_2\text{O}_2^+$  345.1598, Found: 345.1598.

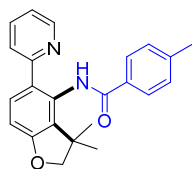

*N*-(3,3-dimethyl-5-(pyridin-2-yl)-2,3-dihydrobenzofuran-4-yl)-4-methylbenzamide (**55**). Yellow solid (39.5 mg, 55%, m.p. 118 - 119 °C).  $^1\text{H}$  NMR (400 MHz,  $\text{CDCl}_3$ )  $\delta$  9.21 (s, 1H), 8.38 (dd,  $J = 4.9, 0.8$  Hz, 1H), 7.73 (d,  $J = 8.1$  Hz, 2H), 7.65 (td,  $J = 7.8, 1.8$  Hz, 1H), 7.50 (d,  $J = 7.9$  Hz, 1H), 7.32 (d,  $J = 8.3$  Hz, 1H), 7.23 (d,  $J = 8.0$  Hz, 2H), 7.06 (ddd,  $J = 7.5, 4.9, 1.0$  Hz, 1H), 6.85 (d,  $J = 8.3$  Hz, 1H), 4.23 (s, 2H), 2.39 (s, 3H), 1.43 (s, 6H).  $^{13}\text{C}$  NMR (100 MHz,  $\text{CDCl}_3$ )  $\delta$  167.5, 161.3, 158.5, 148.1, 142.2, 137.2, 133.8, 132.2, 131.7, 130.8, 130.7, 129.4, 127.5, 123.9, 121.6, 109.5, 85.4, 43.4, 25.7, 21.6. HRMS (ESI-TOF)  $m/z$ :  $[\text{M} + \text{H}]^+$  Calcd for  $\text{C}_{23}\text{H}_{23}\text{N}_2\text{O}_2^+$  359.1754, Found: 359.1754.

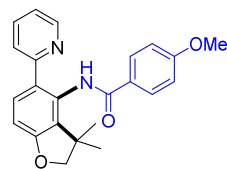

*N*-(3,3-dimethyl-5-(pyridin-2-yl)-2,3-dihydrobenzofuran-4-yl)-4-methoxybenzamide (**56**). Yellow solid (33.7 mg, 45%, m.p. 210 - 211 °C).  $^1\text{H}$  NMR (600 MHz,  $\text{CDCl}_3$ )  $\delta$  9.17 (s, 1H), 8.43 (d,  $J = 4.8$  Hz, 1H), 7.80 (d,  $J = 8.7$  Hz, 2H), 7.67 (td,  $J = 7.7, 1.4$  Hz, 1H), 7.51 (d,  $J = 7.9$  Hz, 1H), 7.33 (d,  $J = 8.2$  Hz, 1H), 7.08 (dd,  $J = 7.1, 5.3$  Hz, 1H), 6.92 (d,  $J = 8.7$  Hz, 2H), 6.85 (d,  $J = 8.2$  Hz, 1H), 4.24 (s, 2H), 3.85 (s, 3H), 1.44 (s, 6H).  $^{13}\text{C}$  NMR (150 MHz,  $\text{CDCl}_3$ )  $\delta$  167.1, 162.5, 161.4, 158.6, 148.1, 137.3, 133.8, 132.5, 130.7, 130.6, 129.3, 126.9, 123.9, 121.6, 113.9, 109.5, 85.4, 55.6, 43.4, 25.8. HRMS (ESI-TOF)  $m/z$ :  $[\text{M} + \text{H}]^+$  Calcd for  $\text{C}_{23}\text{H}_{23}\text{N}_2\text{O}_3^+$  375.1703, Found: 375.1703.

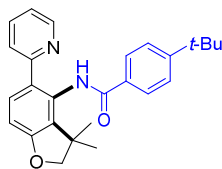

4-(*tert*-butyl)-*N*-(3,3-dimethyl-5-(pyridin-2-yl)-2,3-dihydrobenzofuran-4-yl)benzamide (**57**). White solid (52.9 mg, 66%, m.p. 265 - 266 °C).  $^1\text{H}$  NMR (400 MHz,  $\text{CDCl}_3$ )  $\delta$  9.27 (s, 1H), 8.33 (d,  $J = 4.8$  Hz, 1H), 7.78 (d,  $J = 8.3$  Hz, 2H), 7.65 - 7.61 (m, 1H), 7.49 (d,  $J = 7.8$  Hz, 1H), 7.44 (d,  $J = 8.3$  Hz, 2H), 7.32 (d,  $J = 8.2$  Hz, 1H), 7.08 - 7.02 (m, 1H), 6.84 (d,  $J = 8.2$  Hz, 1H), 4.22 (s, 2H), 1.42 (s, 6H), 1.33 (s, 9H).  $^{13}\text{C}$  NMR (100 MHz,  $\text{CDCl}_3$ )  $\delta$  167.4, 161.2, 158.4, 155.2, 148.1, 137.0, 133.7, 132.1, 131.7, 130.9, 130.7, 127.3, 125.6, 123.9, 121.6, 109.5, 85.3, 43.3, 35.0, 31.3, 25.7. HRMS (ESI-TOF)  $m/z$ :  $[\text{M} + \text{H}]^+$  Calcd for  $\text{C}_{26}\text{H}_{29}\text{N}_2\text{O}_2^+$  401.2224, Found: 401.2223.

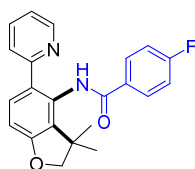

*N*-(3,3-dimethyl-5-(pyridin-2-yl)-2,3-dihydrobenzofuran-4-yl)-4-fluorobenzamide (**58**). White solid (30.5 mg, 42%, m.p. 228 - 229 °C).  $^1\text{H}$  NMR (600 MHz,  $\text{CDCl}_3$ )

$\delta$  9.36 (s, 1H), 8.34 (d,  $J = 4.2$  Hz, 1H), 7.85 (dd,  $J = 8.6, 5.3$  Hz, 2H), 7.66 (td,  $J = 7.8, 1.6$  Hz, 1H), 7.50 (d,  $J = 7.9$  Hz, 1H), 7.33 (d,  $J = 8.3$  Hz, 1H), 7.12 – 7.06 (m, 3H), 6.86 (d,  $J = 8.2$  Hz, 1H), 4.24 (s, 2H), 1.43 (s, 6H).  $^{13}\text{C}$  NMR (150 MHz,  $\text{CDCl}_3$ )  $\delta$  166.6, 165.0 (d,  $J = 252.1$  Hz, 1C), 161.4, 158.5, 148.0, 137.2, 133.8, 132.1, 130.8 (d,  $J = 3.0$  Hz, 1C), 130.7, 130.4, 129.8 (d,  $J = 8.9$  Hz, 2C), 123.9, 121.6, 115.7 (d,  $J = 21.9$  Hz, 2C), 109.7, 85.4, 43.4, 25.7.  $^{19}\text{F}$  NMR (565 MHz,  $\text{CDCl}_3$ )  $\delta$  -107.9. HRMS (ESI-TOF)  $m/z$ :  $[\text{M} + \text{H}]^+$  Calcd for  $\text{C}_{22}\text{H}_{20}\text{FN}_2\text{O}_2^+$  363.1503, Found: 363.1501.

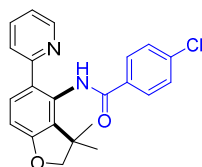

4-chloro-*N*-(3,3-dimethyl-5-(pyridin-2-yl)-2,3-dihydrobenzofuran-4-yl)benzamide (**59**). White solid (41.7 mg, 55%, m.p. 241 - 242 °C).  $^1\text{H}$  NMR (400 MHz,  $\text{CDCl}_3$ )  $\delta$  9.45 (s, 1H), 8.28 (dd,  $J = 4.9, 0.8$  Hz, 1H), 7.82 – 7.75 (m, 2H), 7.65 (td,  $J = 7.8, 1.8$  Hz, 1H), 7.48 (d,  $J = 7.9$  Hz, 1H), 7.43 – 7.36 (m, 2H), 7.32 (d,  $J = 8.3$  Hz, 1H), 7.05 (ddd,  $J = 7.5, 4.9, 1.1$  Hz, 1H), 6.85 (d,  $J = 8.3$  Hz, 1H), 4.23 (s, 2H), 1.41 (s, 6H).  $^{13}\text{C}$  NMR (100 MHz,  $\text{CDCl}_3$ )  $\delta$  166.6, 161.3, 158.3, 148.0, 138.0, 137.2, 133.7, 132.9, 131.9, 130.7, 130.4, 129.0, 128.9, 123.9, 121.7, 109.7, 85.3, 43.4, 25.7. HRMS (ESI-TOF)  $m/z$ :  $[\text{M} + \text{H}]^+$  Calcd for  $\text{C}_{22}\text{H}_{20}\text{ClN}_2\text{O}_2^+$  379.1208, Found: 379.1204.

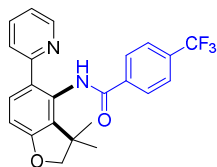

*N*-(3,3-dimethyl-5-(pyridin-2-yl)-2,3-dihydrobenzofuran-4-yl)-4-(trifluoromethyl)benzamide (**60**). White solid (33.0 mg, 40%, m.p. 238 - 239 °C).  $^1\text{H}$  NMR (600 MHz,  $\text{CDCl}_3$ )  $\delta$  9.49 (s, 1H), 8.38 (s, 1H), 7.94 (d,  $J = 8.1$  Hz, 2H), 7.71 – 7.68 (m, 3H), 7.52 (d,  $J = 7.8$  Hz, 1H), 7.35 (d,  $J = 8.3$  Hz, 1H), 7.13 – 7.07 (m, 1H), 6.88 (d,  $J = 8.3$  Hz, 1H), 4.25 (s, 2H), 1.43 (s, 6H).  $^{13}\text{C}$  NMR (150 MHz,  $\text{CDCl}_3$ )  $\delta$  166.2, 161.5, 158.4, 148.0, 137.8, 137.4, 133.8, 133.5 (q,  $J = 32.5$  Hz, 1C), 131.8, 130.8, 130.3, 127.9, 125.8 (q,  $J = 3.9$  Hz, 2C), 124.0, 123.8 (q,  $J = 272.2$  Hz, 1C), 121.8, 109.9, 85.4, 43.4, 25.7.  $^{19}\text{F}$  NMR (565 MHz,  $\text{CDCl}_3$ )  $\delta$  -63.0. HRMS (ESI-TOF)  $m/z$ :  $[\text{M} + \text{H}]^+$  Calcd for  $\text{C}_{23}\text{H}_{20}\text{F}_3\text{N}_2\text{O}_2^+$  413.1471, Found: 413.1474.

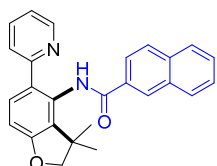

*N*-(3,3-dimethyl-5-(pyridin-2-yl)-2,3-dihydrobenzofuran-4-yl)-2-naphthamide (**61**). White solid (34.7 mg, 44%, m.p. 213 - 214 °C).  $^1\text{H}$  NMR (600 MHz,  $\text{CDCl}_3$ )  $\delta$  9.52 (s, 1H), 8.40 (s, 1H), 8.36 (d,  $J = 4.6$  Hz, 1H), 7.96 – 7.85 (m, 4H), 7.64 (td,  $J = 7.8, 1.5$  Hz, 1H), 7.60 – 7.50 (m, 3H), 7.36 (d,  $J = 8.3$  Hz, 1H), 7.02 (dd,  $J = 7.0, 5.4$  Hz, 1H), 6.88 (d,  $J = 8.3$  Hz, 1H), 4.26 (s, 2H), 1.53 – 1.42 (m, 6H).  $^{13}\text{C}$  NMR (150 MHz,  $\text{CDCl}_3$ )  $\delta$  167.6, 161.4, 158.4, 148.1, 137.2, 135.0, 133.8, 132.8, 132.3, 131.8, 130.7, 129.2, 128.6, 128.1, 127.9, 126.9, 124.0, 121.6, 109.6, 85.4, 43.4, 25.8. HRMS (ESI-TOF)  $m/z$ :  $[\text{M} + \text{H}]^+$  Calcd for  $\text{C}_{26}\text{H}_{23}\text{N}_2\text{O}_2^+$  395.1754, Found: 395.1754.

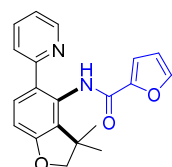

*N*-(3,3-dimethyl-5-(pyridin-2-yl)-2,3-dihydrobenzofuran-4-yl)furan-2-carboxamide (**62**). Brown solid (26.8 mg, 40%, m.p. 110 - 111 °C).  $^1\text{H}$  NMR (400 MHz,  $\text{CDCl}_3$ )  $\delta$  9.00 (s, 1H), 8.48 (d,  $J = 4.2$  Hz, 1H), 7.67 (td,  $J = 7.8, 1.7$  Hz, 1H), 7.49 (d,  $J = 7.0$  Hz, 2H), 7.32 (d,  $J = 8.3$  Hz, 1H), 7.11 (ddd,  $J = 7.4, 4.9, 0.9$  Hz, 1H), 7.04 (d,  $J = 3.3$  Hz, 1H), 6.85 (d,  $J = 8.3$  Hz, 1H), 6.47 (dd,  $J = 3.4, 1.7$  Hz, 1H), 4.24 (s, 2H), 1.44 (s, 6H).  $^{13}\text{C}$  NMR (100 MHz,  $\text{CDCl}_3$ )  $\delta$  161.2, 158.3, 158.0, 148.2, 148.0, 144.5, 137.2, 133.8, 131.2, 130.8, 123.8, 121.6, 114.8, 112.1, 109.7, 85.3, 43.3, 25.9. HRMS (ESI-TOF)  $m/z$ :  $[\text{M} + \text{H}]^+$  Calcd for  $\text{C}_{20}\text{H}_{19}\text{N}_2\text{O}_3^+$  335.1390, Found: 335.1389.

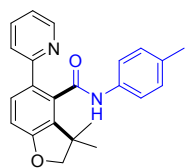

3,3-dimethyl-5-(pyridin-2-yl)-*N*-(*p*-tolyl)-2,3-dihydrobenzofuran-4-carboxamide (**63**). White solid (40.2 mg, 56%, m.p. 176 - 177 °C).  $^1\text{H}$  NMR (400 MHz,  $\text{CDCl}_3$ )  $\delta$  8.54 (ddd,  $J = 4.9, 1.6, 0.9$  Hz, 1H), 7.64 (td,  $J = 7.7, 1.8$  Hz, 1H), 7.55 (d,  $J = 7.9$  Hz, 1H), 7.49 (s, 1H), 7.43 (d,  $J = 8.3$  Hz, 1H), 7.19 (d,  $J = 8.4$  Hz, 2H), 7.14 (ddd,  $J = 7.5, 4.9, 1.1$  Hz, 1H), 7.07 (d,  $J = 8.2$  Hz, 2H), 6.94 (d,  $J = 8.3$  Hz, 1H), 4.26 (s, 2H), 2.29 (s, 3H), 1.50 (s, 7H).  $^{13}\text{C}$  NMR (100 MHz,  $\text{CDCl}_3$ )  $\delta$  166.6, 160.6, 157.9, 149.3, 136.7, 135.1, 134.4, 133.8, 133.3, 131.0, 130.5, 129.6, 123.6, 122.0, 120.4, 111.4, 85.7, 43.3, 26.3, 21.0. HRMS (ESI-TOF)  $m/z$ :  $[\text{M} + \text{H}]^+$  Calcd for  $\text{C}_{23}\text{H}_{23}\text{N}_2\text{O}_2^+$  359.1754, Found: 359.1745.

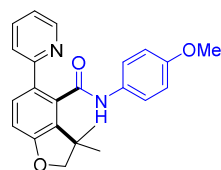

*N*-(4-methoxyphenyl)-3,3-dimethyl-5-(pyridin-2-yl)-2,3-dihydrobenzofuran-4-carboxamide (**64**). White solid (44.3 mg, 59%, m.p. 177 - 178 °C).  $^1\text{H}$  NMR (600 MHz,  $\text{CDCl}_3$ )  $\delta$  8.30 (s, 1H), 8.27 (d,  $J = 4.5$  Hz, 1H), 7.65 (td,  $J = 7.8, 1.5$  Hz, 1H), 7.56 (d,  $J = 7.9$  Hz, 1H), 7.36 (d,  $J = 8.3$  Hz, 1H), 7.27 - 7.22 (m, 2H), 7.11 - 7.08 (m, 1H), 6.84 (d,  $J = 8.3$  Hz, 1H), 6.79 (d,  $J = 8.9$  Hz, 2H), 4.24 (s, 2H), 3.74 (s, 3H), 1.48 (s, 6H).  $^{13}\text{C}$  NMR (150 MHz,  $\text{CDCl}_3$ )  $\delta$  166.5, 160.6, 157.2, 156.7, 148.4, 137.1, 133.7, 133.2, 130.8, 130.3, 129.9, 123.8, 122.5, 122.0, 114.1, 111.2, 85.6, 55.5, 43.2, 26.1. HRMS (ESI-TOF)  $m/z$ :  $[\text{M} + \text{Na}]^+$  Calcd for  $\text{C}_{23}\text{H}_{22}\text{N}_2\text{NaO}_3^+$  397.1523, Found: 397.1516.

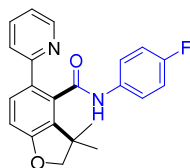

*N*-(4-fluorophenyl)-3,3-dimethyl-5-(pyridin-2-yl)-2,3-dihydrobenzofuran-4-carboxamide (**65**). White solid (34.5 mg, 47%, m.p. 195 - 196 °C).  $^1\text{H}$  NMR (600 MHz,  $\text{CDCl}_3$ )  $\delta$  8.33 (d,  $J = 4.4$  Hz, 1H), 8.04 (s, 1H), 7.64 - 7.61 (m, 1H), 7.52 (d,  $J = 7.9$  Hz, 1H), 7.37 (d,  $J = 8.3$  Hz, 1H), 7.29 (dd,  $J = 8.8, 4.8$  Hz, 2H), 7.11 - 7.07 (m, 1H), 6.96 (t,  $J = 8.6$  Hz, 2H), 6.88 (d,  $J = 8.3$  Hz, 1H), 4.26 (s, 2H), 1.49 (s, 6H).  $^{13}\text{C}$  NMR (150 MHz,  $\text{CDCl}_3$ )  $\delta$  166.8, 160.6, 159.7 (d,  $J = 243.6$  Hz, 1C), 157.7, 149.0, 136.7, 133.9, 133.8 (d,  $J = 2.8$  Hz, 1C), 132.9, 130.7, 130.3, 123.6, 122.4 (d,  $J = 7.8$  Hz, 2C), 121.9, 115.7 (d,  $J = 22.8$  Hz, 2C), 111.5, 85.7, 43.3, 26.2.  $^{19}\text{F}$  NMR (565 MHz,  $\text{CDCl}_3$ )  $\delta$  -117.5. HRMS (ESI-TOF)  $m/z$ :  $[\text{M} + \text{Na}]^+$  Calcd for  $\text{C}_{22}\text{H}_{19}\text{FN}_2\text{NaO}_2^+$  385.1323, Found: 385.1317.

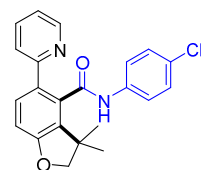

*N*-(4-chlorophenyl)-3,3-dimethyl-5-(pyridin-2-yl)-2,3-dihydrobenzofuran-4-carboxamide (**66**). White solid (32.7 mg, 43%, m.p. 203 - 204 °C).  $^1\text{H}$  NMR (600 MHz,  $\text{CDCl}_3$ )  $\delta$  8.283 - 8.275 (m, 2H), 7.64 (td,  $J = 7.7, 1.5$  Hz, 1H), 7.52 (d,  $J = 7.9$  Hz, 1H), 7.35 (dd,  $J = 12.6, 8.6$  Hz, 3H), 7.23 (d,  $J = 8.8$  Hz, 2H), 7.09 (dd,  $J = 6.9, 5.3$  Hz, 1H), 6.87 (d,  $J = 8.3$  Hz, 1H), 4.26 (s, 2H), 1.47 (s, 6H).  $^{13}\text{C}$  NMR (151 MHz,  $\text{CDCl}_3$ )  $\delta$  166.7, 160.7, 157.4, 148.7, 137.0, 136.4, 134.0, 132.8, 130.27, 130.23, 129.7, 129.1, 123.6, 122.1, 121.7, 111.5, 85.7, 43.2, 26.1. HRMS (ESI-TOF)  $m/z$ :  $[\text{M} + \text{Na}]^+$  Calcd for  $\text{C}_{22}\text{H}_{19}\text{ClN}_2\text{NaO}_2^+$  401.1027, Found: 401.1024.

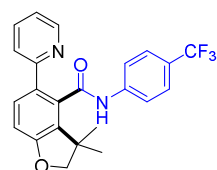

3,3-dimethyl-5-(pyridin-2-yl)-*N*-(4-(trifluoromethyl)phenyl)-2,3-dihydrobenzofuran-4-carboxamide (**67**). White solid (35.9 mg, 44%, m.p. 218 - 219 °C).  $^1\text{H}$  NMR (600 MHz,  $\text{DMSO}-d_6$ )  $\delta$  10.55 (s, 1H), 8.45 (dd,  $J = 4.7, 0.6$  Hz, 1H), 7.77 - 7.71 (m, 3H), 7.66 - 7.61 (m, 3H), 7.59 (d,  $J = 8.4$  Hz, 1H), 7.20 - 7.18 (m, 1H), 7.01



(d,  $J = 8.4$  Hz, 1H), 4.24 (s, 2H), 1.36 (s, 6H).  $^{13}\text{C}$  NMR (150 MHz,  $\text{DMSO-}d_6$ )  $\delta$  166.7, 159.8, 156.7, 148.8, 142.4, 136.8, 133.5, 133.0, 130.4, 129.9, 125.9 (q,  $J = 3.5$  Hz, 2C), 124.4 (q,  $J = 271.0$  Hz, 1C), 123.4 (q,  $J = 32.0$  Hz, 1C), 122.3, 121.7, 119.4, 110.5, 84.6, 42.5, 25.9.  $^{19}\text{F}$  NMR (565 MHz,  $\text{DMSO-}d_6$ )  $\delta$  -60.4. HRMS (ESI-TOF)  $m/z$ :  $[\text{M} + \text{Na}]^+$  Calcd for  $\text{C}_{23}\text{H}_{19}\text{F}_3\text{N}_2\text{NaO}_2^+$  435.1291, Found: 435.1281.

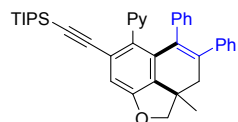

2-(2a-methyl-4,5-diphenyl-7-((triisopropylsilyl)ethynyl)-2a,3-dihydro-2H-naphtho[1,8-*bc*]furan-6-yl)pyridine (**68**). Red solid (33.1 mg, 57%, m.p. 90 - 91 °C).

$^1\text{H}$  NMR (600 MHz,  $\text{CDCl}_3$ )  $\delta$  8.18 (s, 1H), 7.18 - 6.91 (m, 5H), 6.90 - 6.15 (m, 9H), 4.57 (d,  $J = 8.2$  Hz, 1H), 4.33 (d,  $J = 8.0$  Hz, 1H), 3.21 (d,  $J = 14.8$  Hz, 1H), 2.57 (d,  $J = 14.8$  Hz, 1H), 1.46 (s, 3H), 0.94 - 0.76 (m, 21H).  $^{13}\text{C}$  NMR (150 MHz,  $\text{CDCl}_3$ )  $\delta$  158.10, 158.08, 156.5, 148.34, 148.31, 143.7, 139.2, 134.6, 134.44, 134.36, 128.1, 127.8, 127.0, 126.1, 125.6, 120.8, 113.47, 113.45, 106.3, 93.4, 86.7, 43.0, 40.9, 21.4, 18.6, 11.2. HRMS (ESI-TOF)  $m/z$ :  $[\text{M} + \text{H}]^+$  Calcd for  $\text{C}_{40}\text{H}_{44}\text{NOSi}^+$  582.3187, Found: 582.3189.

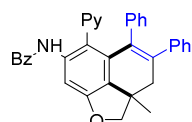

*N*-(2a-methyl-4,5-diphenyl-6-(pyridin-2-yl)-2a,3-dihydro-2H-naphtho[1,8-*bc*]furan-7-yl)benzamide (**69**). White solid (36.9 mg, 71%, m.p. 199 - 200 °C).

$^1\text{H}$  NMR (600 MHz,  $\text{CDCl}_3$ )  $\delta$  10.81 (s, 1H), 8.30 (s, 1H), 8.10 (s, 1H), 7.71 (d,  $J = 4.9$  Hz, 2H), 7.44 (t,  $J = 7.2$  Hz, 1H), 7.37 - 7.32 (m, 2H), 7.11 - 7.01 (m, 4H), 6.95 - 6.79 (m, 3H), 6.79 - 6.54 (m, 6H), 4.60 (d,  $J = 8.1$  Hz, 1H), 4.40 (d,  $J = 8.1$  Hz, 1H), 3.27 (d,  $J = 14.2$  Hz, 1H), 2.63 (d,  $J = 14.3$  Hz, 1H), 1.42 (s, 3H).  $^{13}\text{C}$  NMR (150 MHz,  $\text{CDCl}_3$ )  $\delta$  165.1, 157.4, 156.3, 147.4, 144.3, 140.0, 139.3, 138.5, 136.2, 135.2, 134.0, 132.1, 131.6, 131.2, 130.5, 128.9, 128.6, 128.4, 128.0, 127.1, 126.3, 126.0, 122.7, 121.1, 119.6, 103.9, 86.6, 43.5, 40.9, 21.1. HRMS (ESI-TOF)  $m/z$ :  $[\text{M} + \text{H}]^+$  Calcd for  $\text{C}_{36}\text{H}_{29}\text{N}_2\text{O}_2^+$  521.2224, Found: 521.2222.

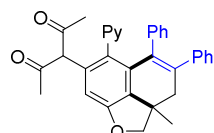

3-(2a-methyl-4,5-diphenyl-6-(pyridin-2-yl)-2a,3-dihydro-2H-naphtho[1,8-*bc*]furan-7-yl)pentane-2,4-dione (**70**). Brown solid (27.9 mg, 56%, m.p. 200 - 201 °C).

$^1\text{H}$  NMR (600 MHz,  $\text{CDCl}_3$ )  $\delta$  8.16 (d,  $J = 3.6$  Hz, 1H), 7.07 - 6.95 (m, 5H), 6.82 (d,  $J = 7.2$  Hz, 3H), 6.75 - 6.53 (m, 6H), 6.38 (d,  $J = 7.6$  Hz, 1H), 4.61 (d,  $J = 8.2$  Hz, 1H), 4.37 (d,  $J = 8.1$  Hz, 1H), 3.32 (d,  $J = 14.8$  Hz, 1H), 2.60 (d,  $J = 14.8$  Hz, 1H), 2.00 (s, 3H), 1.66 (s, 3H), 1.50 (s, 3H).  $^{13}\text{C}$  NMR (150 MHz,  $\text{CDCl}_3$ )  $\delta$  192.2, 189.6, 158.4, 157.1, 148.3, 143.6, 139.6, 139.3, 137.3, 134.7, 134.5, 133.9, 133.5, 132.2, 128.1, 127.7, 127.07, 127.02, 126.1, 126.0, 125.6, 120.8, 114.2, 112.1, 86.8, 43.2, 40.9, 24.6, 24.3, 21.5. HRMS (ESI-TOF)  $m/z$ :  $[\text{M} + \text{H}]^+$  Calcd for  $\text{C}_{34}\text{H}_{30}\text{NO}_3^+$  500.2220, Found: 500.2220.

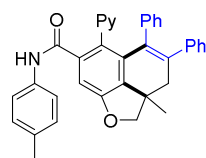

2a-methyl-4,5-diphenyl-6-(pyridin-2-yl)-*N*-(*p*-tolyl)-2a,3-dihydro-2H-naphtho[1,8-*bc*]furan-7-carboxamide (**71**). Brown solid (35.2 mg, 66%, m.p. 116 - 117 °C).

$^1\text{H}$  NMR (600 MHz,  $\text{DMSO-}d_6$ )  $\delta$  9.94 (s, 1H), 8.04 (s, 1H), 7.30 (d,  $J = 8.2$  Hz, 2H), 7.09 (t,  $J = 7.5$  Hz, 2H), 7.03 (t,  $J = 7.3$  Hz, 2H), 6.97 (d,  $J = 8.3$  Hz, 2H), 6.93 (s, 1H), 6.89 (d,  $J = 7.6$  Hz, 2H), 6.80 (d,  $J = 7.8$  Hz, 1H), 6.76 - 6.42 (m, 7H), 4.67 (d,  $J = 8.5$  Hz, 1H), 4.41 (d,  $J = 8.6$  Hz, 1H), 3.24 (d,  $J = 14.6$  Hz, 1H), 2.57 (d,  $J = 15.2$  Hz, 1H), 2.18 (s, 3H), 1.43 (s, 3H).  $^{13}\text{C}$  NMR (150 MHz,  $\text{CDCl}_3$ )  $\delta$  167.3, 157.0, 148.4, 148.3, 143.3, 140.0, 135.6, 135.5, 135.1, 134.0, 133.7, 129.5, 129.24, 129.17, 128.2, 127.9, 127.7, 127.0, 126.9, 126.5, 126.1, 125.7, 121.5, 120.2,

119.6, 108.8, 86.6, 42.9, 40.7, 21.1, 20.8. HRMS (ESI-TOF)  $m/z$ :  $[M + H]^+$  Calcd for  $C_{37}H_{31}N_2O_2^+$  535.2380, Found: 535.2376.

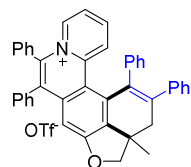

3a-methyl-1,2,7,8-tetraphenyl-3a,4-dihydro-3*H*-isobenzofuro[1,7-*gh*]pyrido[2,1-*a*]isoquinolin-9-ium trifluoromethanesulfinate (**72**). Brown solid (70.5 mg, 97%, m.p. 184 - 185 °C).  $^1H$  NMR (600 MHz,  $CDCl_3$ )  $\delta$  8.32 – 8.22 (m, 2H), 7.55 (t,  $J = 7.8$  Hz, 1H), 7.44 – 7.40 (m, 1H), 7.39 – 7.19 (m, 13H), 7.12 (s, 2H), 6.95 – 6.89 (m, 3H), 6.84 (s, 3H), 4.72 (d,  $J = 8.2$  Hz, 1H), 4.48 (d,  $J = 8.3$  Hz, 1H), 3.60 (d,  $J = 14.4$  Hz, 1H), 2.84 (d,  $J = 14.4$  Hz, 1H), 1.43 (s, 3H).  $^{13}C$  NMR (150 MHz,  $CDCl_3$ )  $\delta$  161.3, 143.3, 142.7, 142.5, 141.3, 137.9, 137.4, 136.9, 136.5, 134.6, 134.2, 133.6, 132.8, 132.7, 131.5, 130.7, 130.4, 130.3, 130.1, 130.0, 129.8, 129.7, 128.7, 128.52, 128.47, 128.43, 128.3, 127.9, 127.5, 127.2, 121.7, 116.3, 106.2, 86.6, 41.9, 41.0, 19.7.  $^{19}F$  NMR (565 MHz,  $CDCl_3$ )  $\delta$  -78.2. HRMS (ESI-TOF)  $m/z$ :  $[M-OTf]^+$  Calcd for  $C_{43}H_{32}NO^+$  578.2478, Found: 578.2480. HRMS (ESI-TOF)  $m/z$ :  $[M]^-$  Calcd for  $OTf^-$  148.9526, Found: 148.9527.

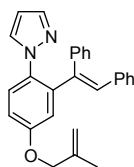

(*E*)-1-(2-(1,2-diphenylvinyl)-4-((2-methylallyl)oxy)phenyl)-1*H*-pyrazole (**73**). White solid (70.6 mg, 45%, m.p. 95 - 96 °C).  $^1H$  NMR (600 MHz,  $CDCl_3$ )  $\delta$  7.43 (d,  $J = 1.5$  Hz, 1H), 7.36 (d,  $J = 2.2$  Hz, 1H), 7.32 (d,  $J = 8.7$  Hz, 1H), 7.15 – 7.06 (m, 6H), 7.04 – 7.02 (m, 3H), 6.99 – 6.91 (m, 3H), 6.67 (s, 1H), 6.09 (t,  $J = 2.1$  Hz, 1H), 5.12 (s, 1H), 5.02 (s, 1H), 4.49 (s, 2H), 1.86 (s, 3H).  $^{13}C$  NMR (150 MHz,  $CDCl_3$ )  $\delta$  158.4, 141.7, 140.6, 140.0, 139.9, 139.0, 137.1, 132.8, 131.0, 130.9, 129.6, 129.4, 128.1, 128.0, 127.9, 127.2, 127.1, 117.5, 114.2, 113.2, 106.0, 72.1, 19.5. HRMS (ESI-TOF)  $m/z$ :  $[M + H]^+$  Calcd for  $C_{27}H_{25}N_2O^+$  393.1961, Found: 393.1952.

## 7. NMR spectrum and HPLC Chromatogram

$^1\text{H}$  NMR (400 MHz,  $\text{CDCl}_3$ )

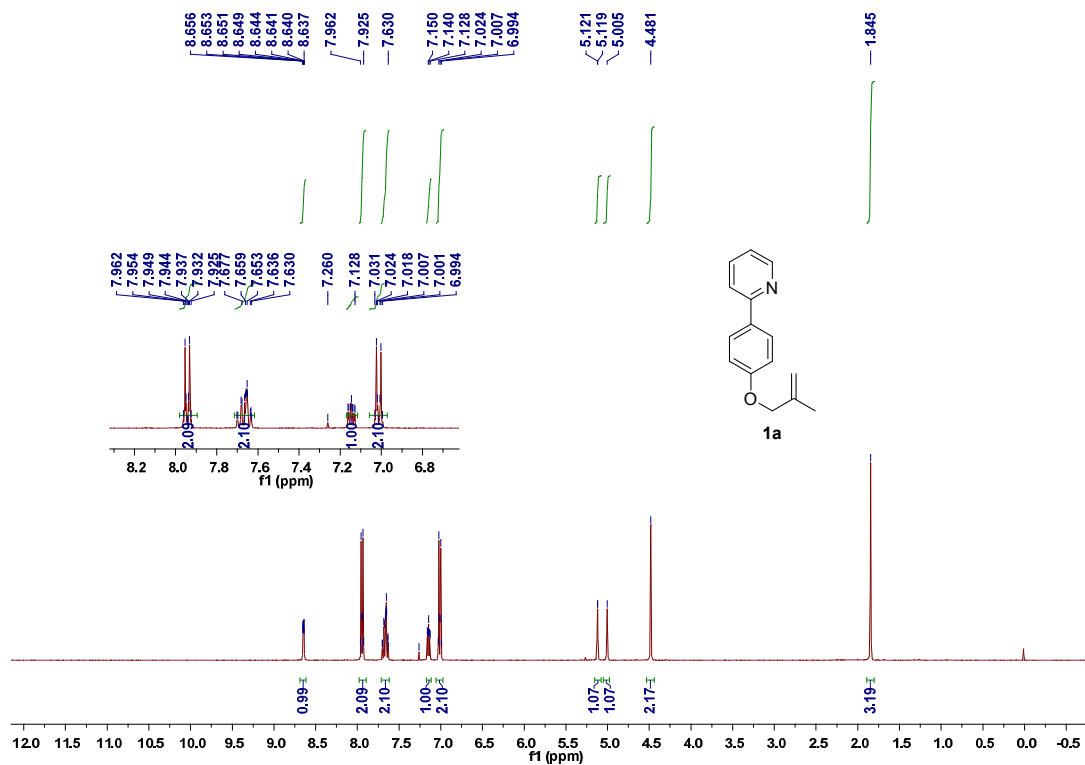

$^{13}\text{C}$  NMR (100 MHz,  $\text{CDCl}_3$ )

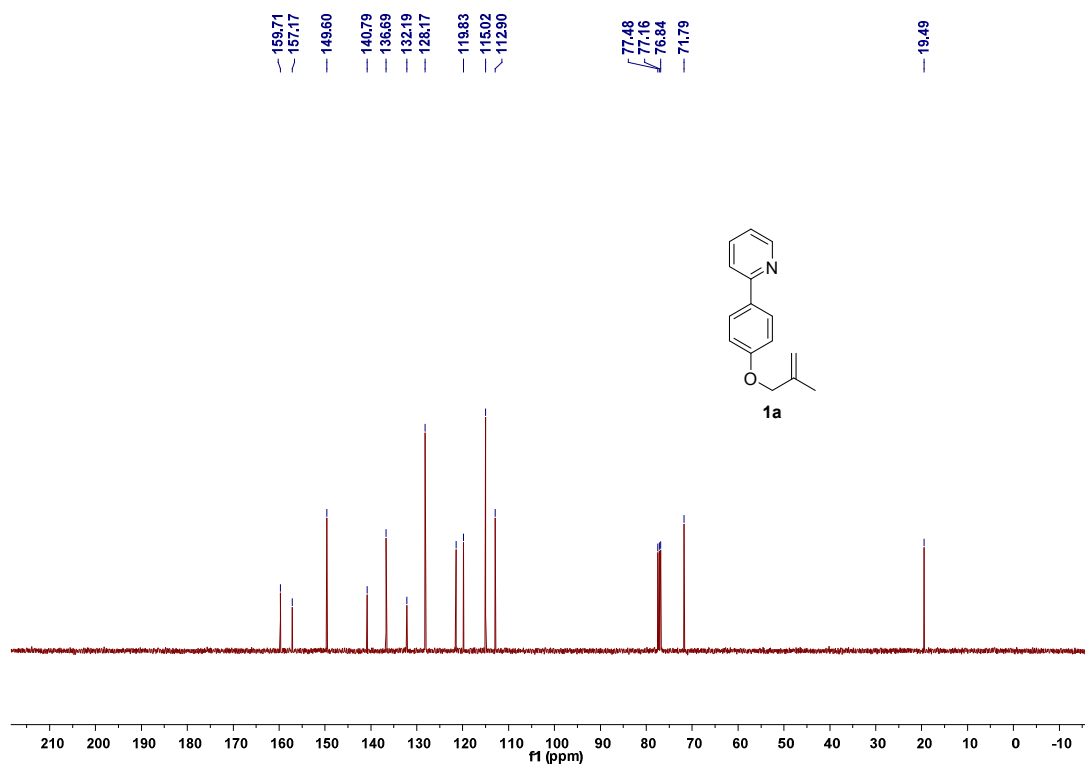

$^1\text{H}$  NMR (400 MHz,  $\text{CDCl}_3$ )

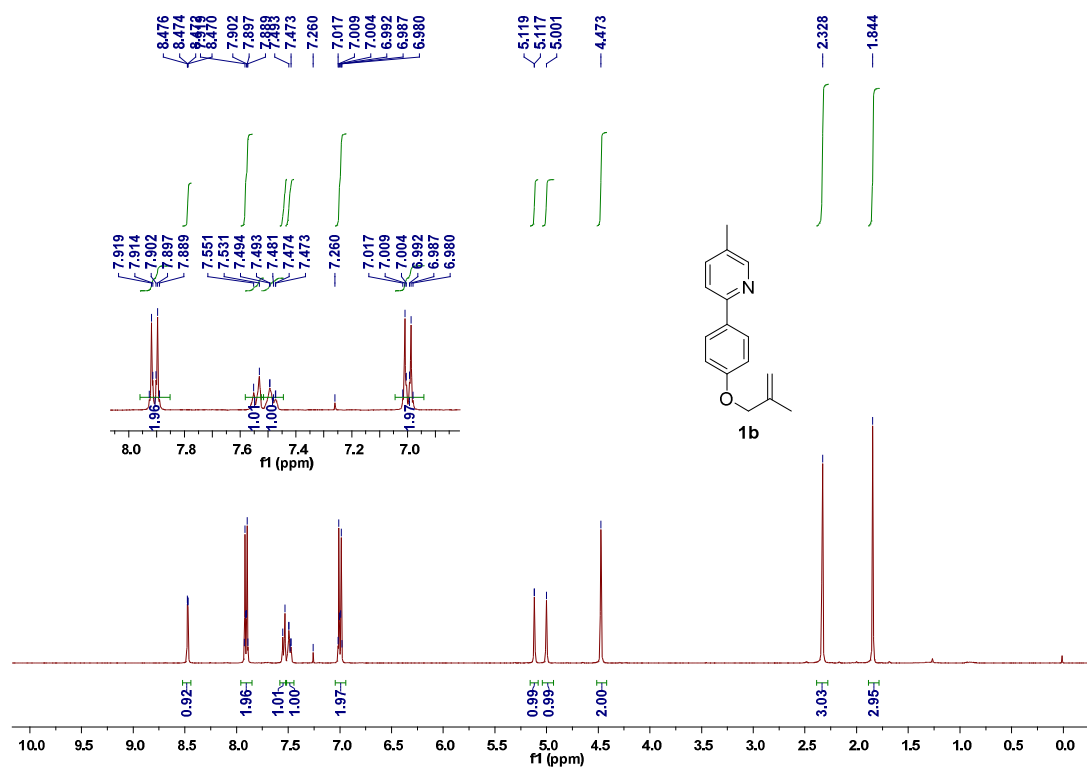

$^{13}\text{C}$  NMR (100 MHz,  $\text{CDCl}_3$ )

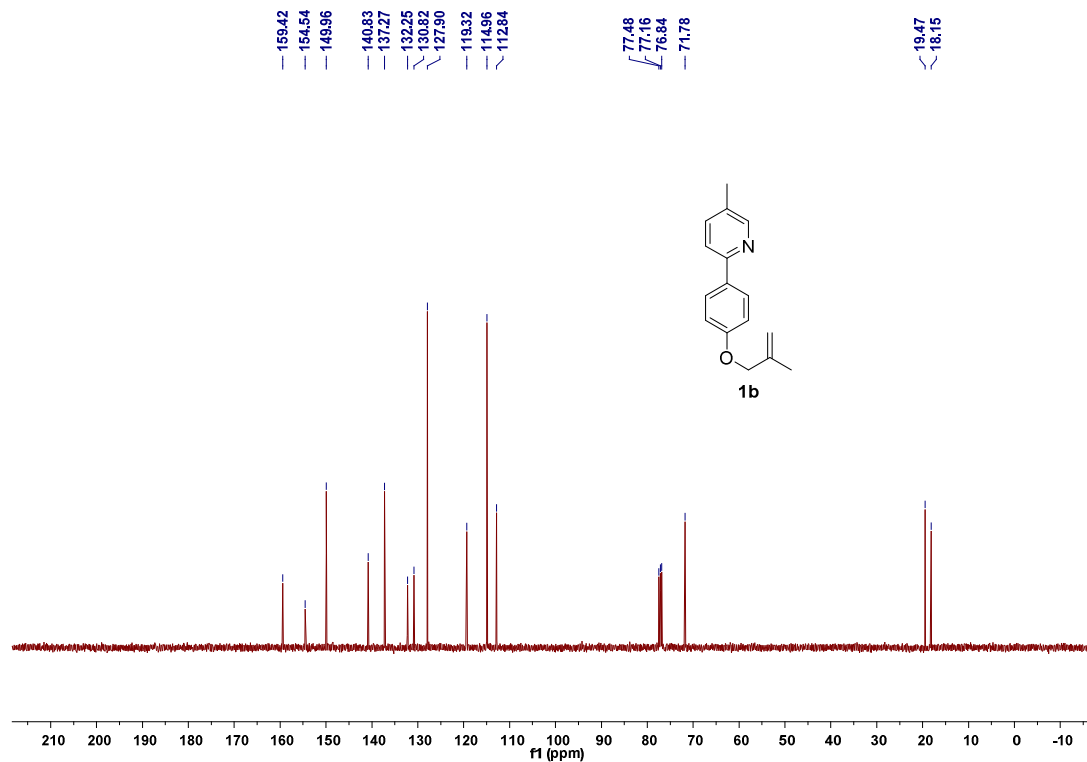

$^1\text{H}$  NMR (400 MHz,  $\text{CDCl}_3$ )

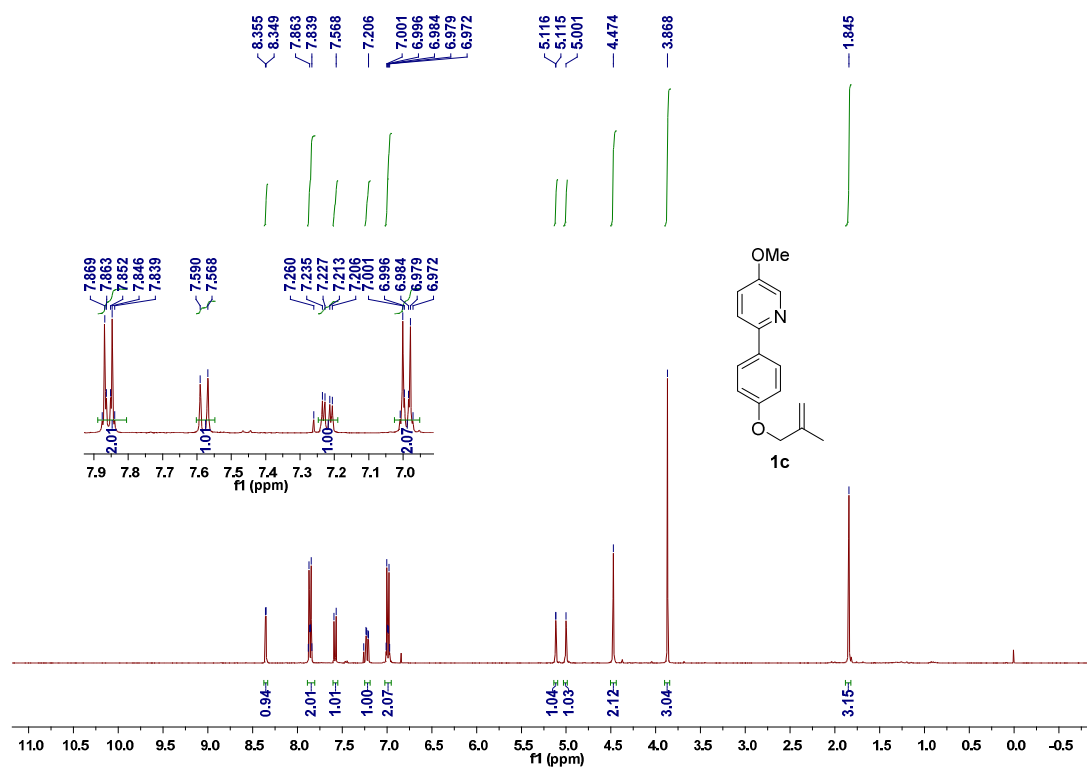

$^{13}\text{C}$  NMR (100 MHz,  $\text{CDCl}_3$ )

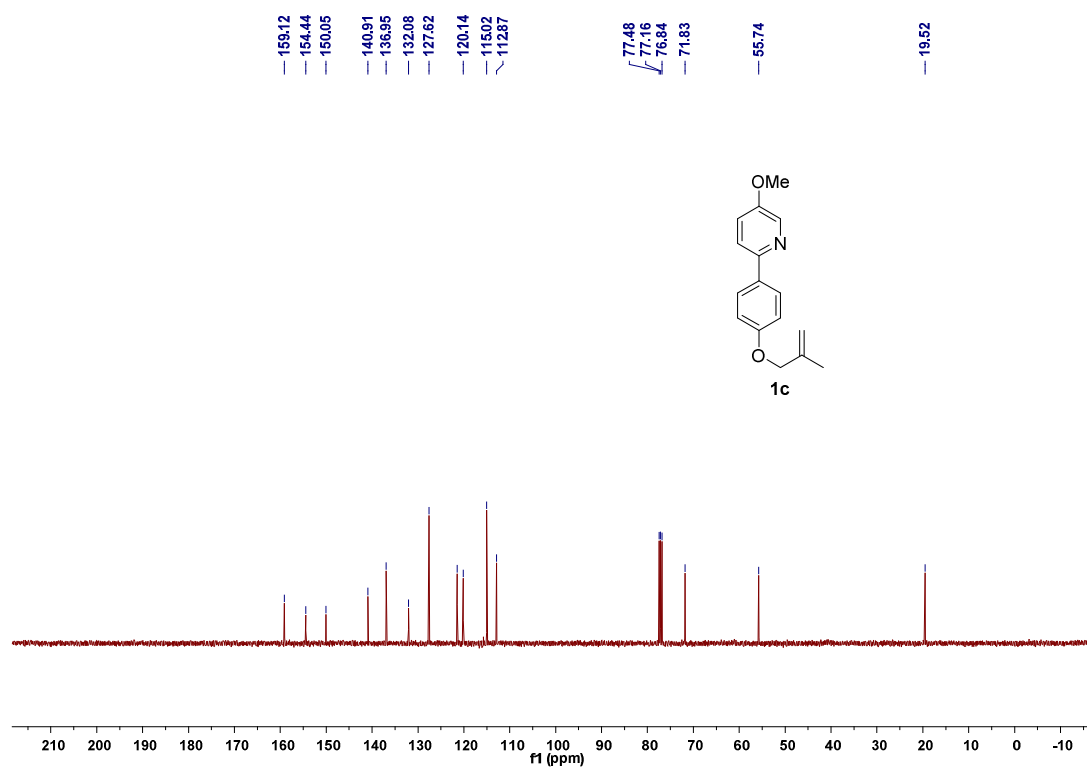

$^1\text{H}$  NMR (600 MHz,  $\text{CDCl}_3$ )

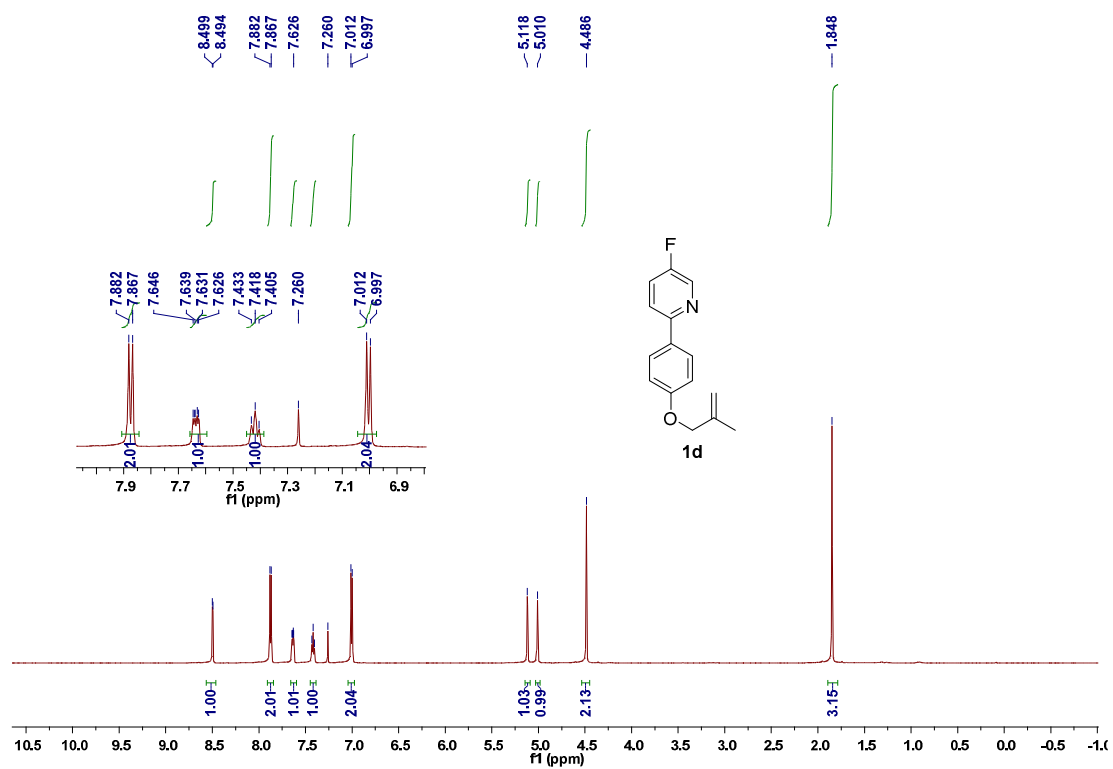

$^{13}\text{C}$  NMR (150 MHz,  $\text{CDCl}_3$ )

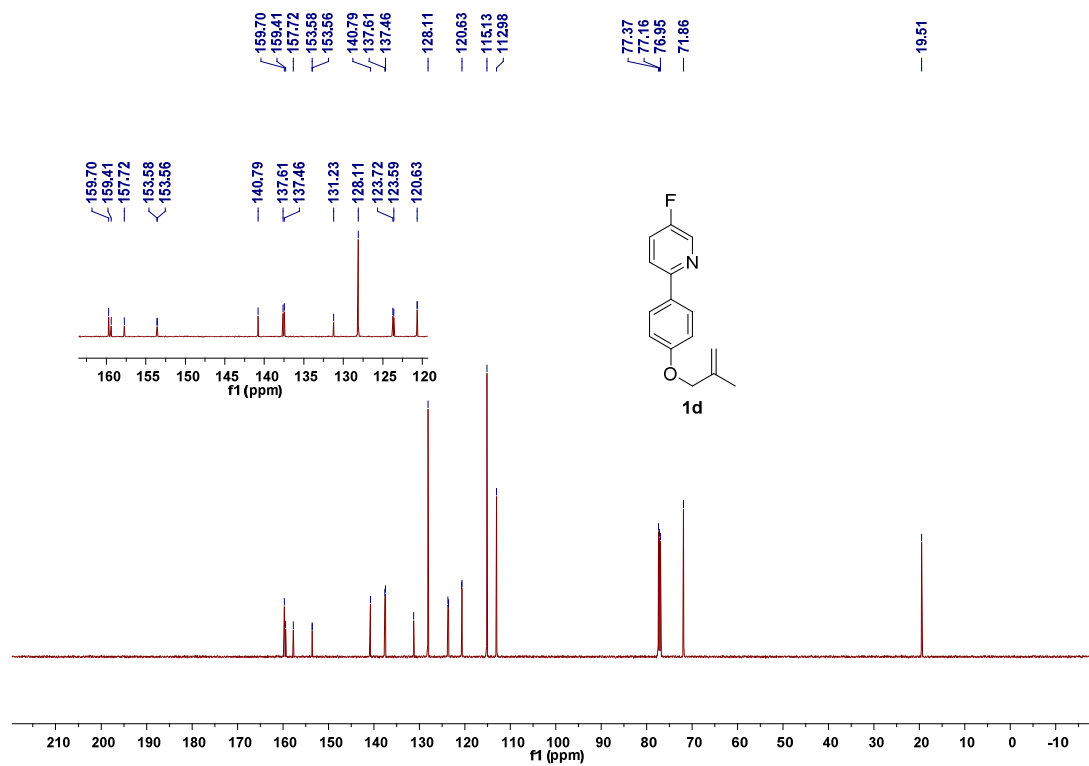

$^{19}\text{F}$  NMR (565 MHz,  $\text{CDCl}_3$ )

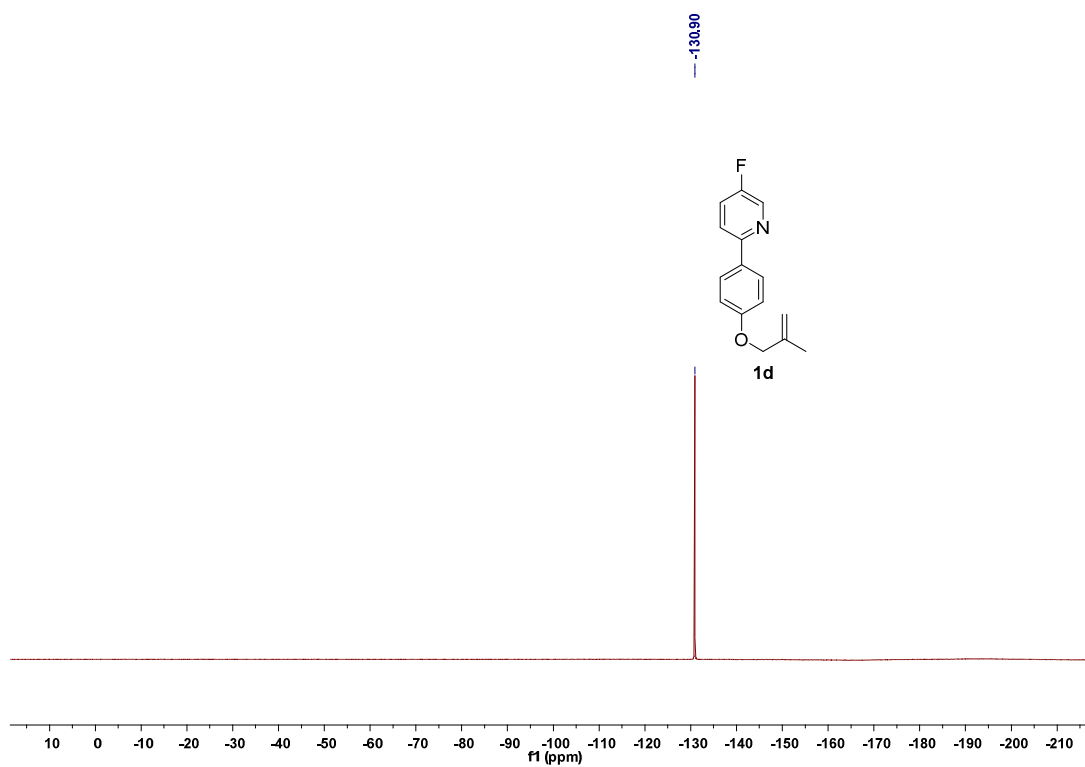

$^1\text{H}$  NMR (400 MHz,  $\text{CDCl}_3$ )

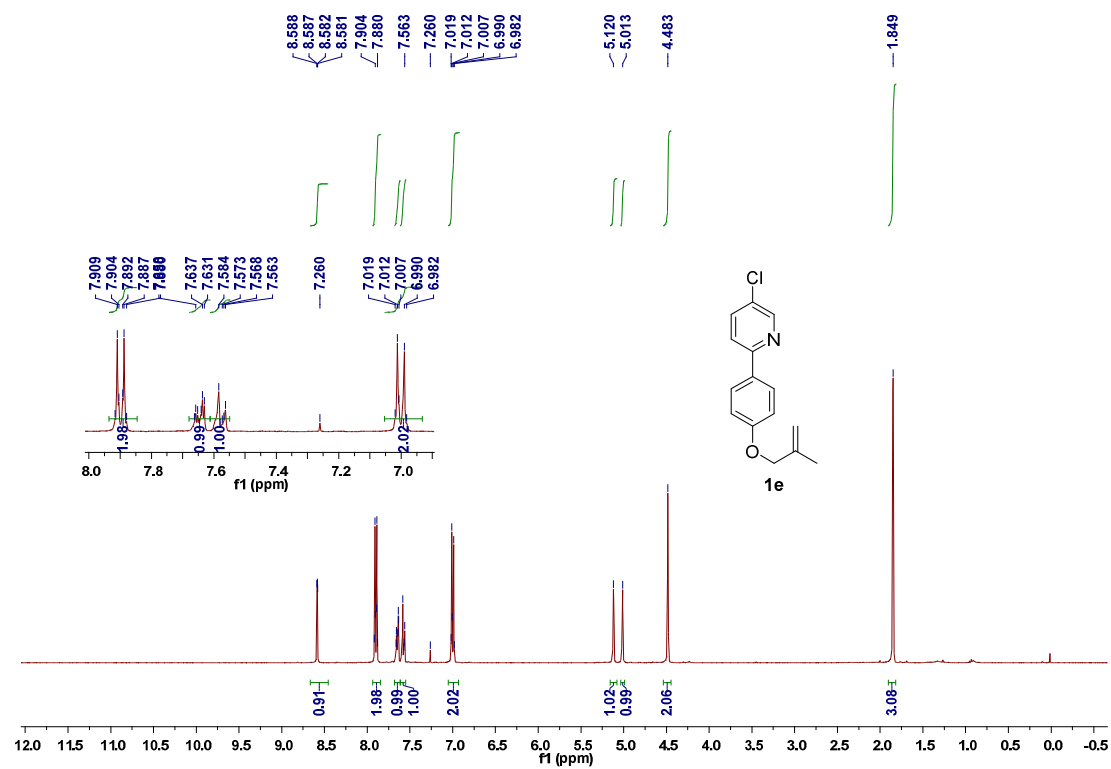

$^{13}\text{C}$  NMR (100 MHz,  $\text{CDCl}_3$ )

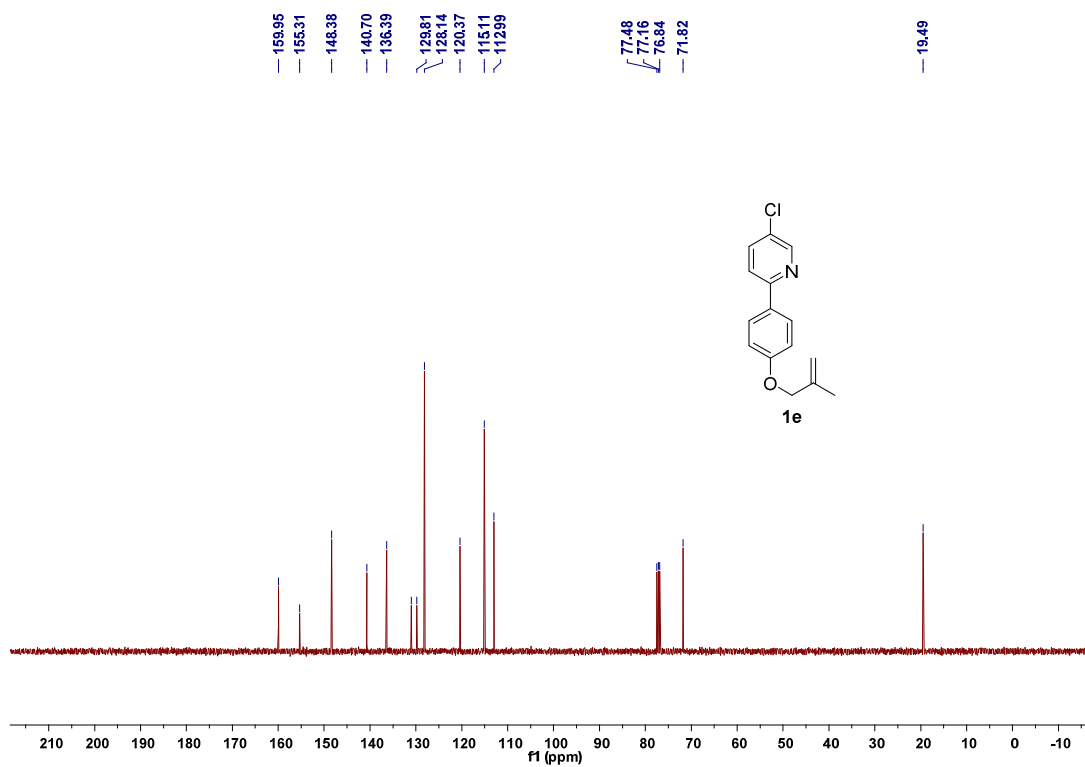

$^1\text{H}$  NMR (600 MHz,  $\text{CDCl}_3$ )

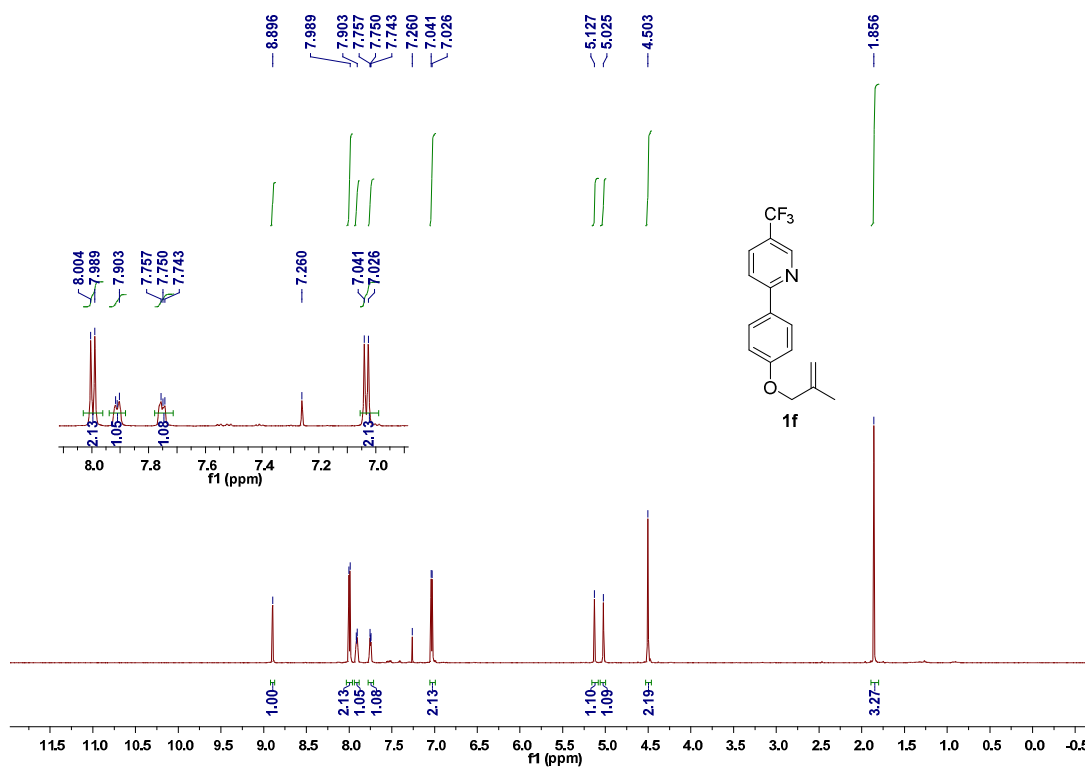



$^{13}\text{C}$  NMR (150 MHz,  $\text{CDCl}_3$ )

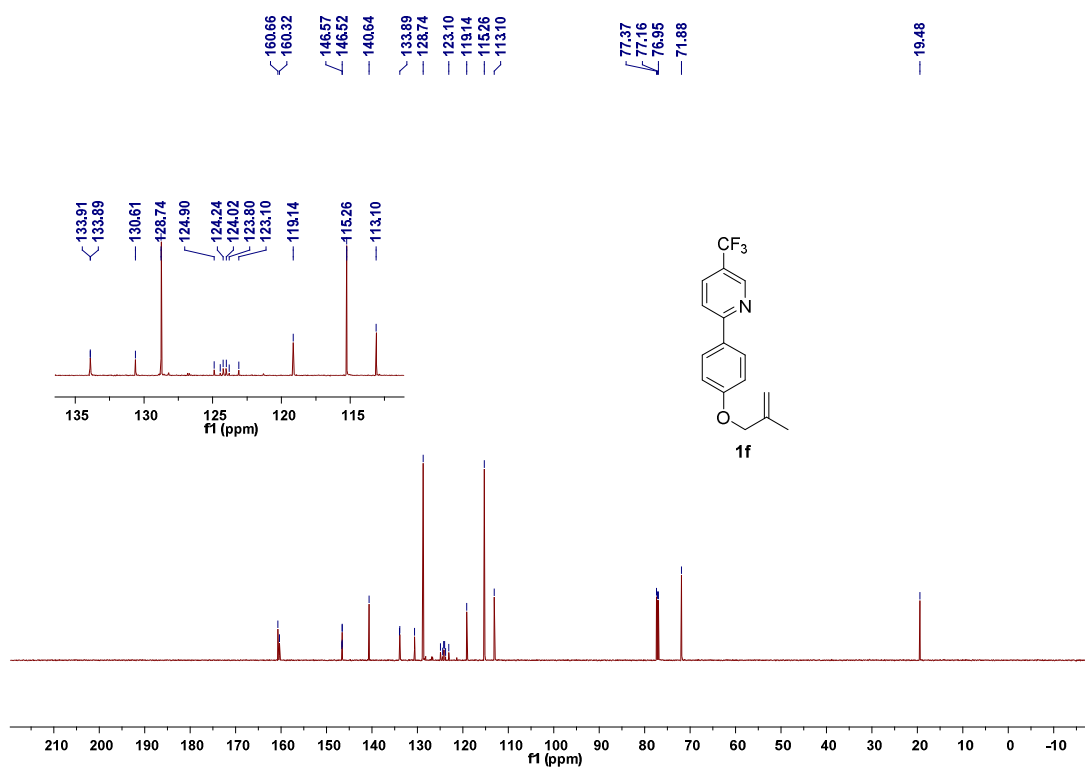

$^{19}\text{F}$  NMR (565 MHz,  $\text{CDCl}_3$ )

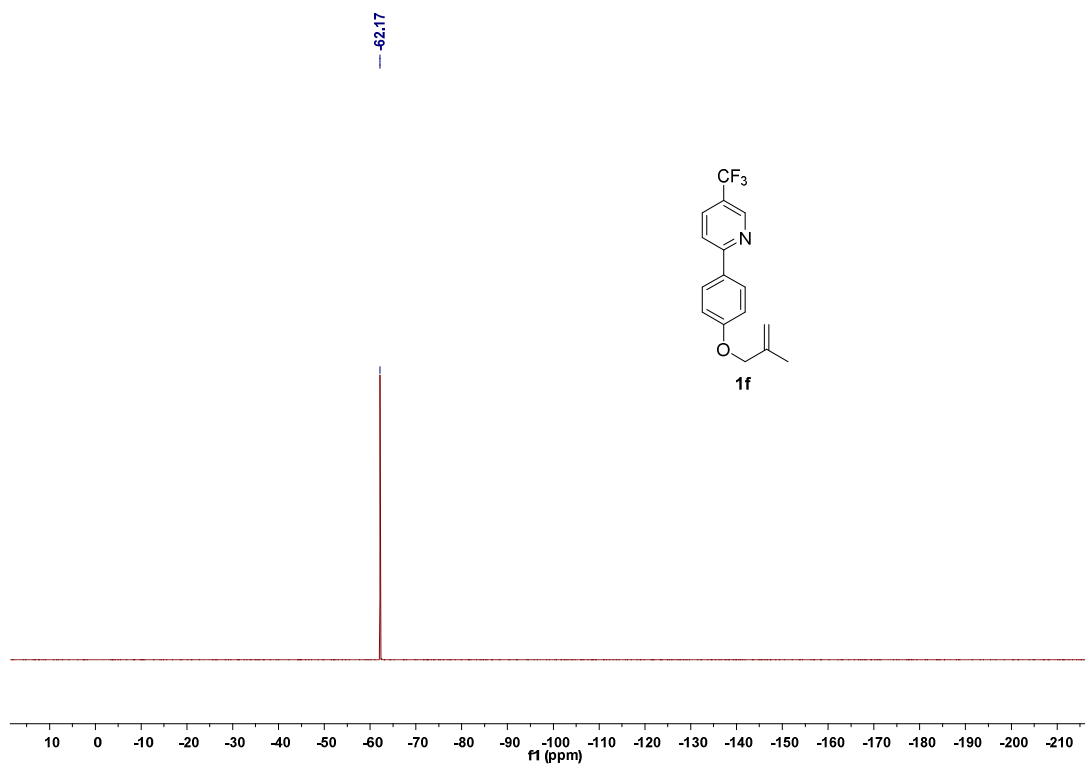

$^1\text{H}$  NMR (400 MHz,  $\text{CDCl}_3$ )

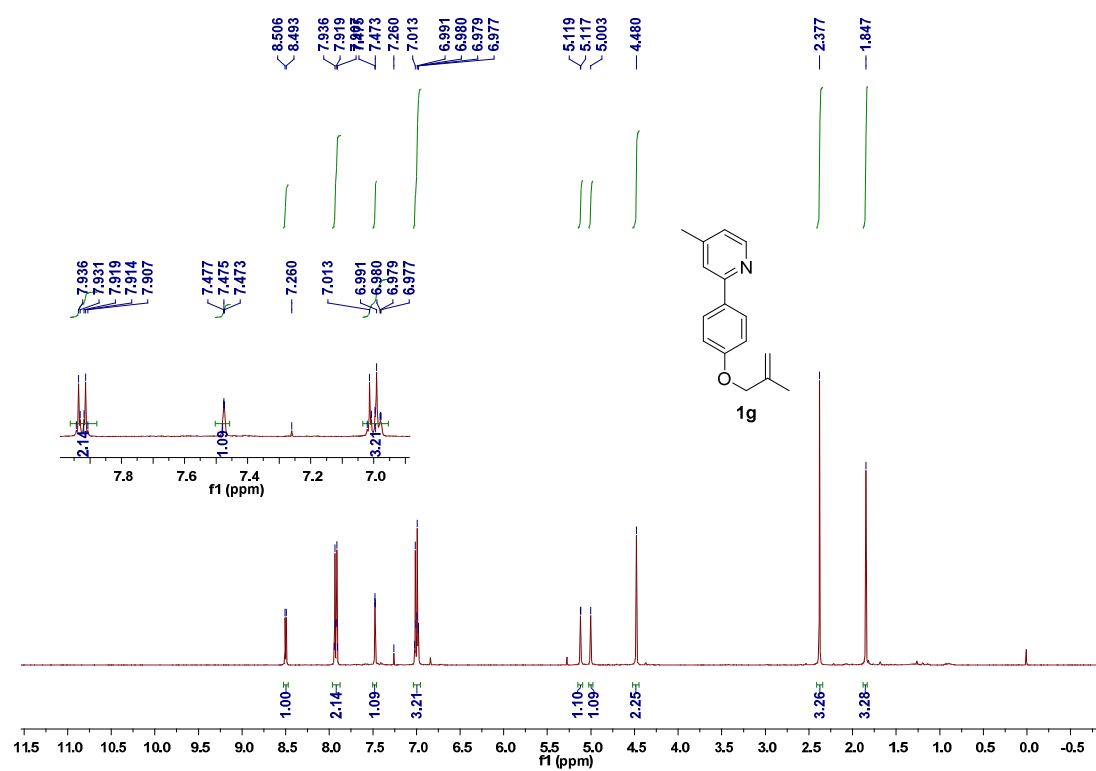

$^{13}\text{C}$  NMR (100 MHz,  $\text{CDCl}_3$ )

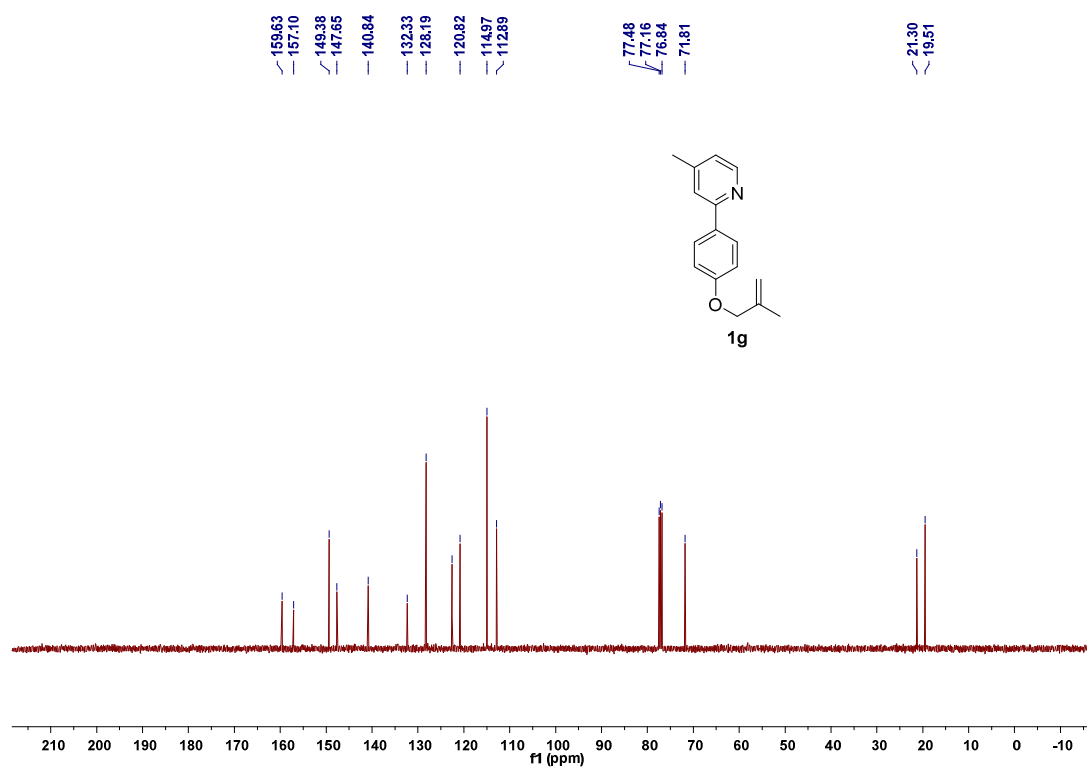

$^1\text{H}$  NMR (600 MHz,  $\text{CDCl}_3$ )

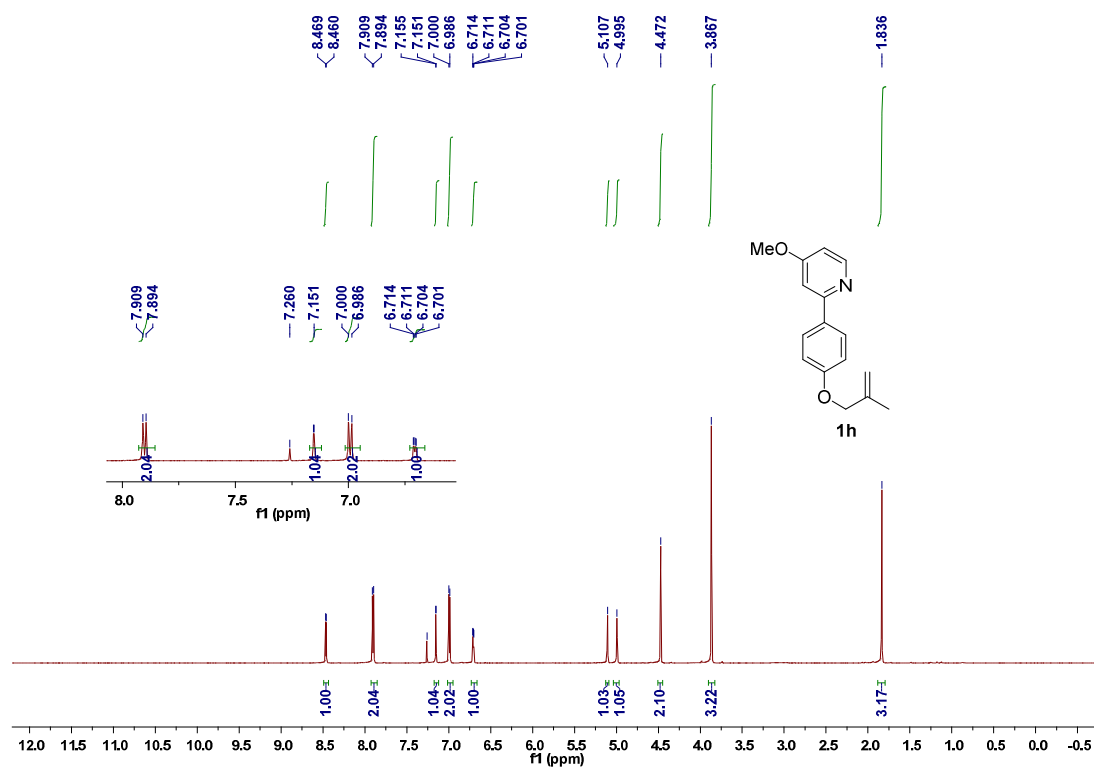

$^{13}\text{C}$  NMR (150 MHz,  $\text{CDCl}_3$ )

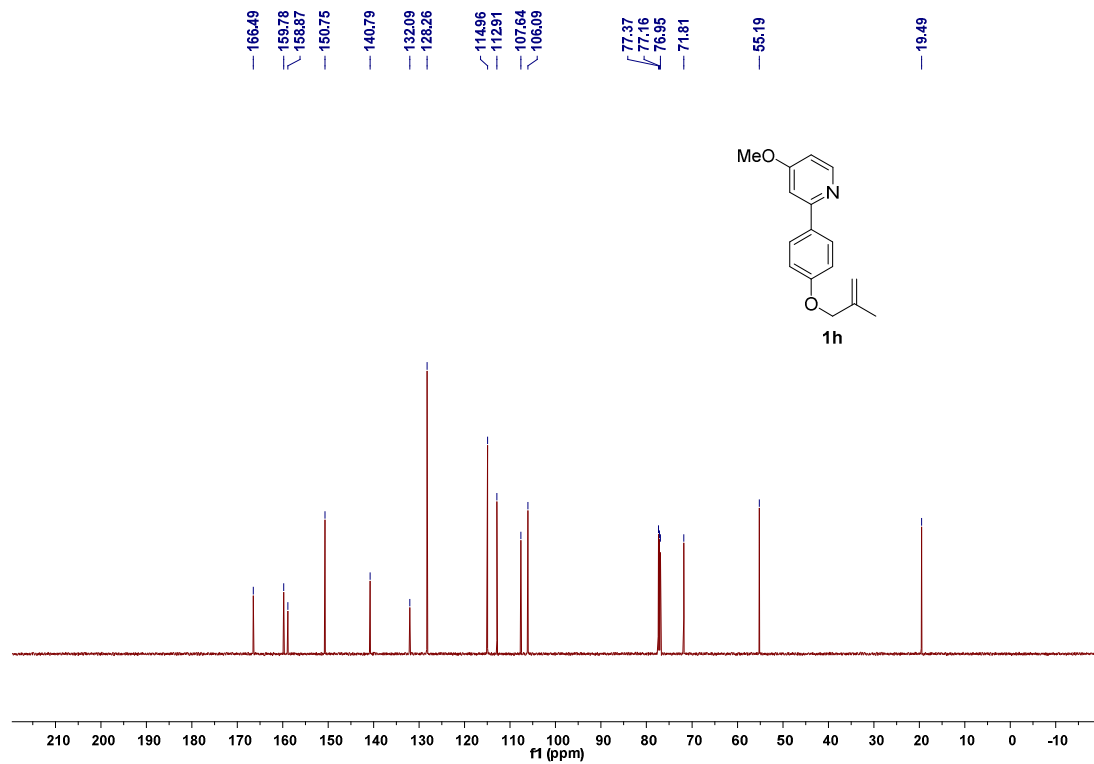

$^1\text{H}$  NMR (400 MHz,  $\text{CDCl}_3$ )

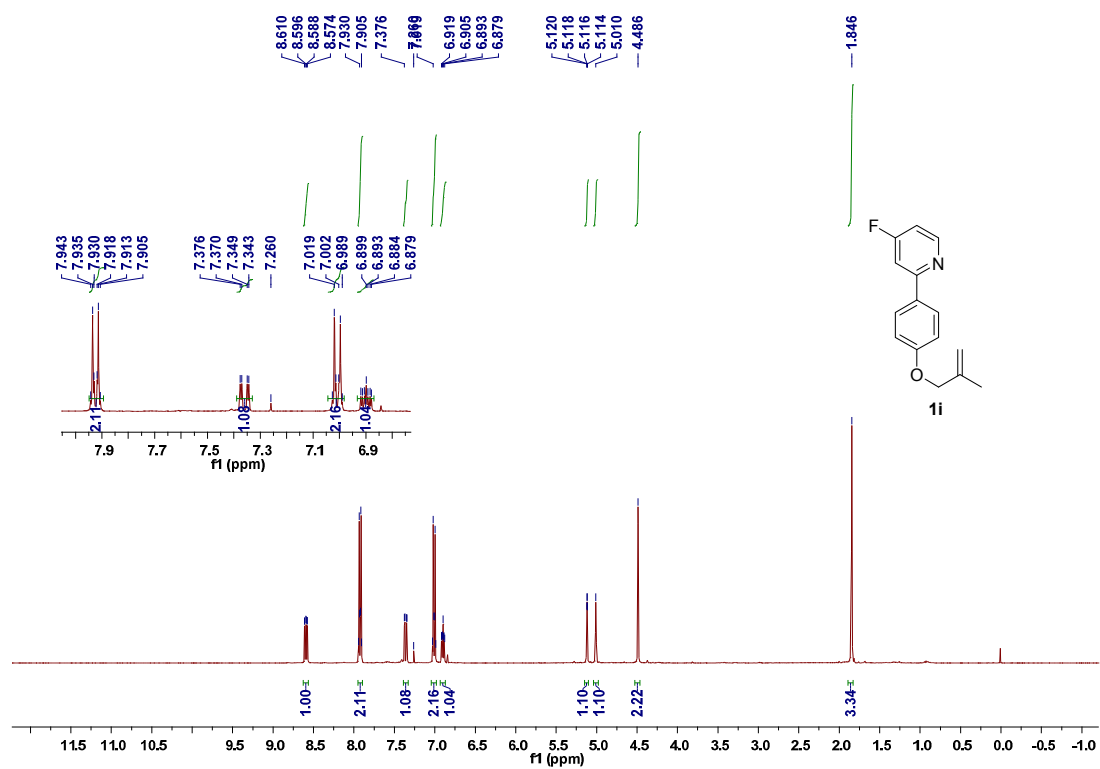

$^{13}\text{C}$  NMR (100 MHz,  $\text{CDCl}_3$ )

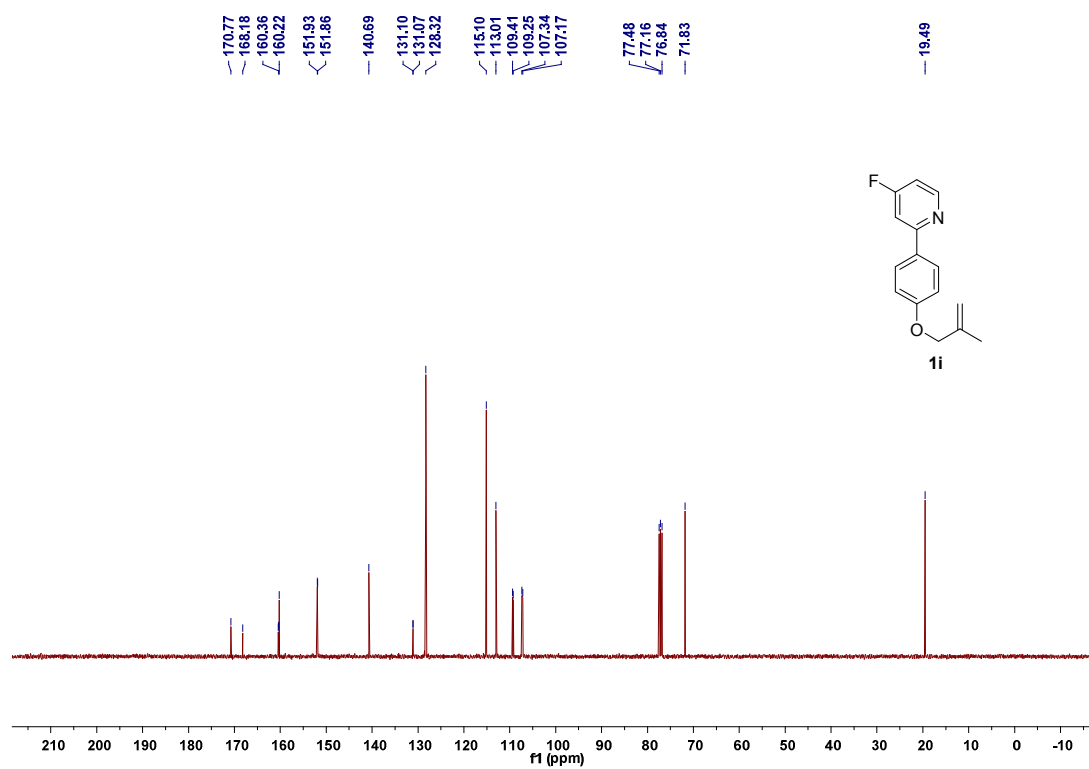

$^{19}\text{F}$  NMR (376 MHz,  $\text{CDCl}_3$ )

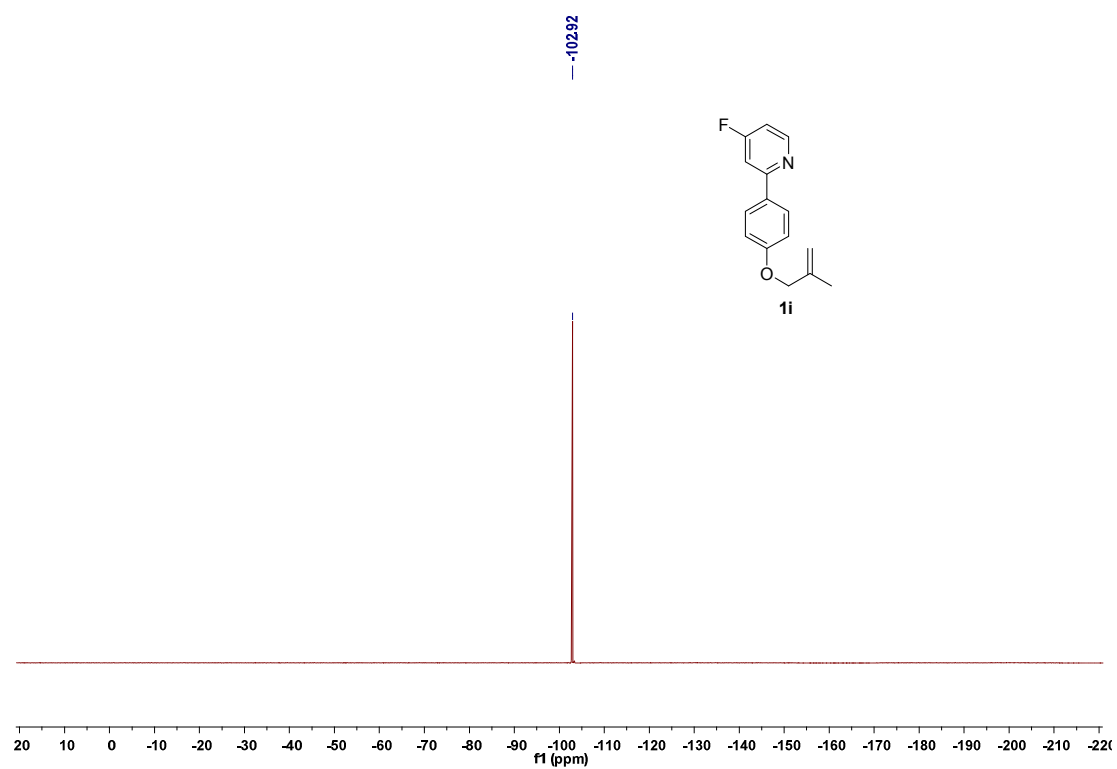

$^1\text{H}$  NMR (400 MHz,  $\text{CDCl}_3$ )

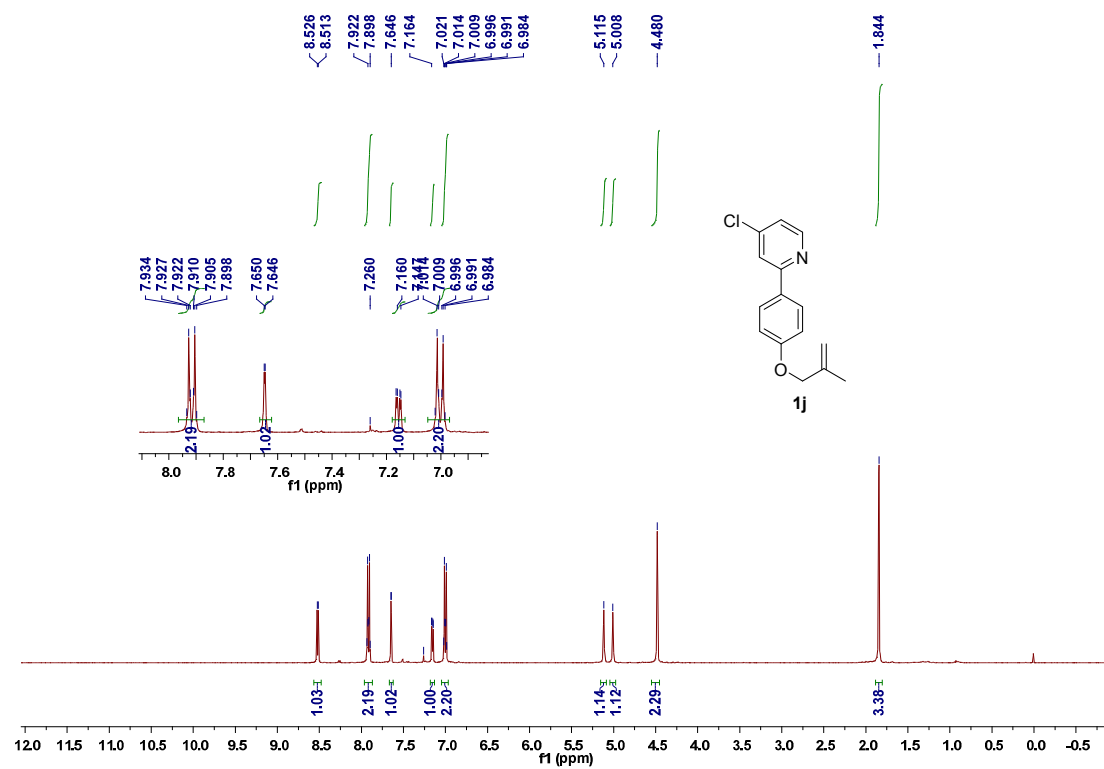

$^{13}\text{C}$  NMR (100 MHz,  $\text{CDCl}_3$ )

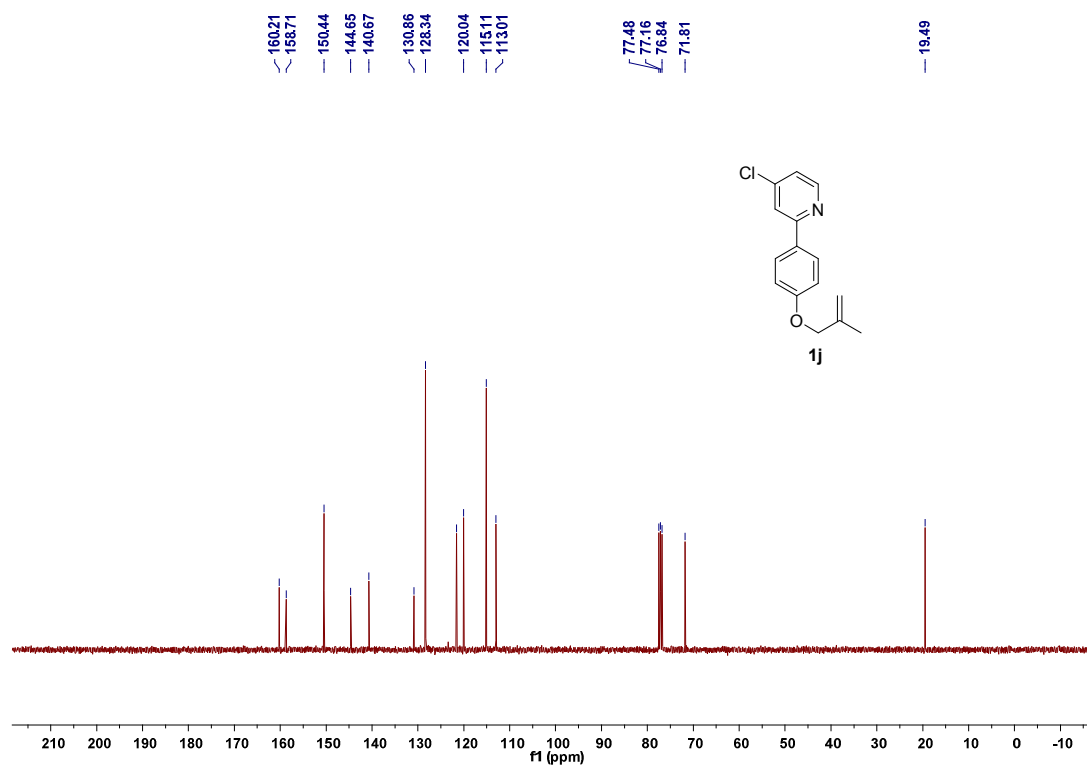

$^1\text{H}$  NMR (600 MHz,  $\text{DMSO}-d_6$ )

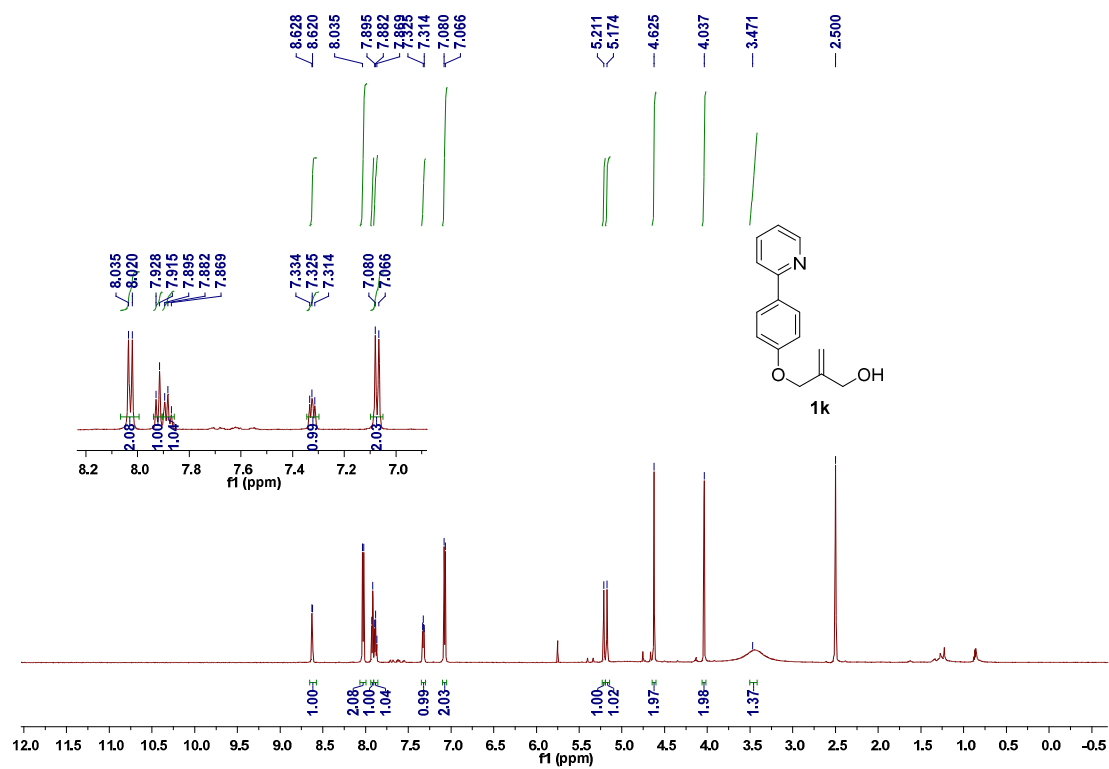

$^{13}\text{C}$  NMR (150 MHz,  $\text{DMSO-}d_6$ )

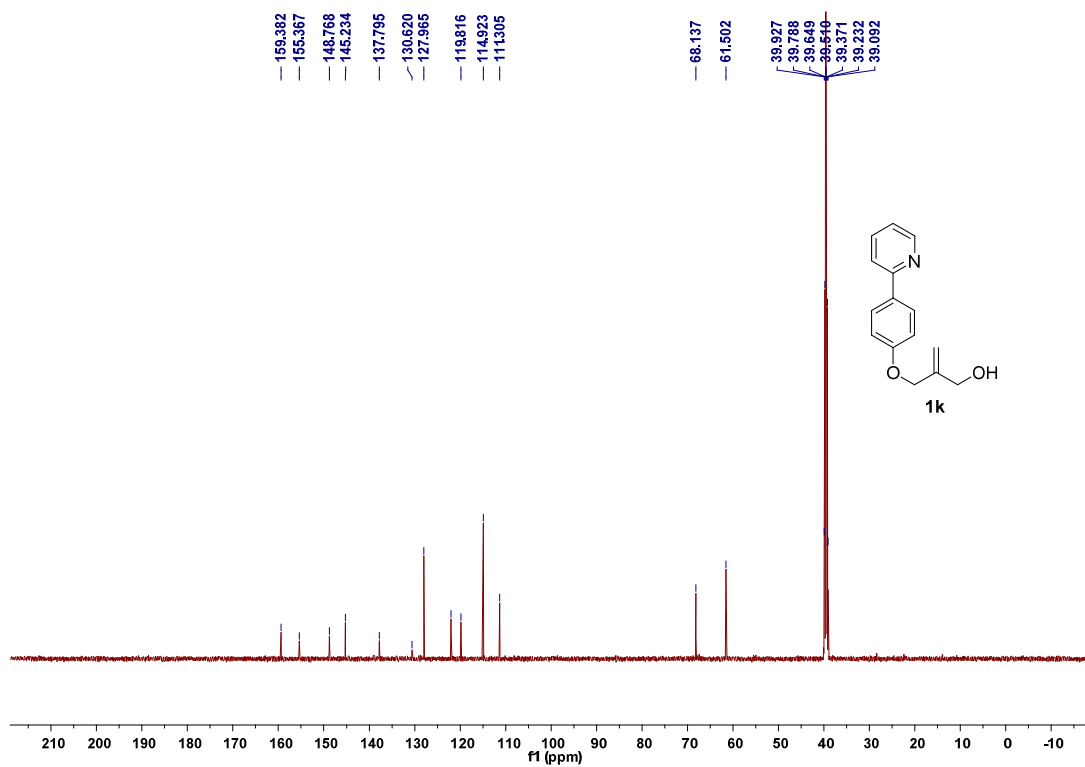

$^1\text{H}$  NMR (400 MHz,  $\text{CDCl}_3$ )

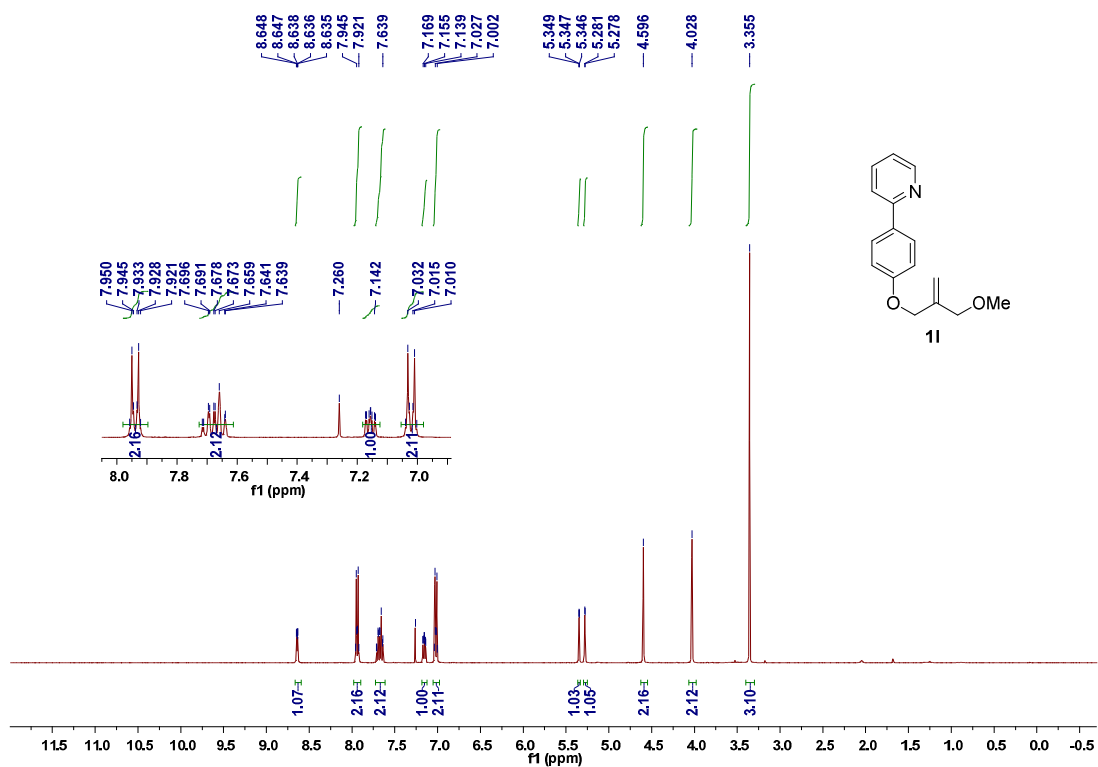

$^{13}\text{C}$  NMR (100 MHz,  $\text{CDCl}_3$ )

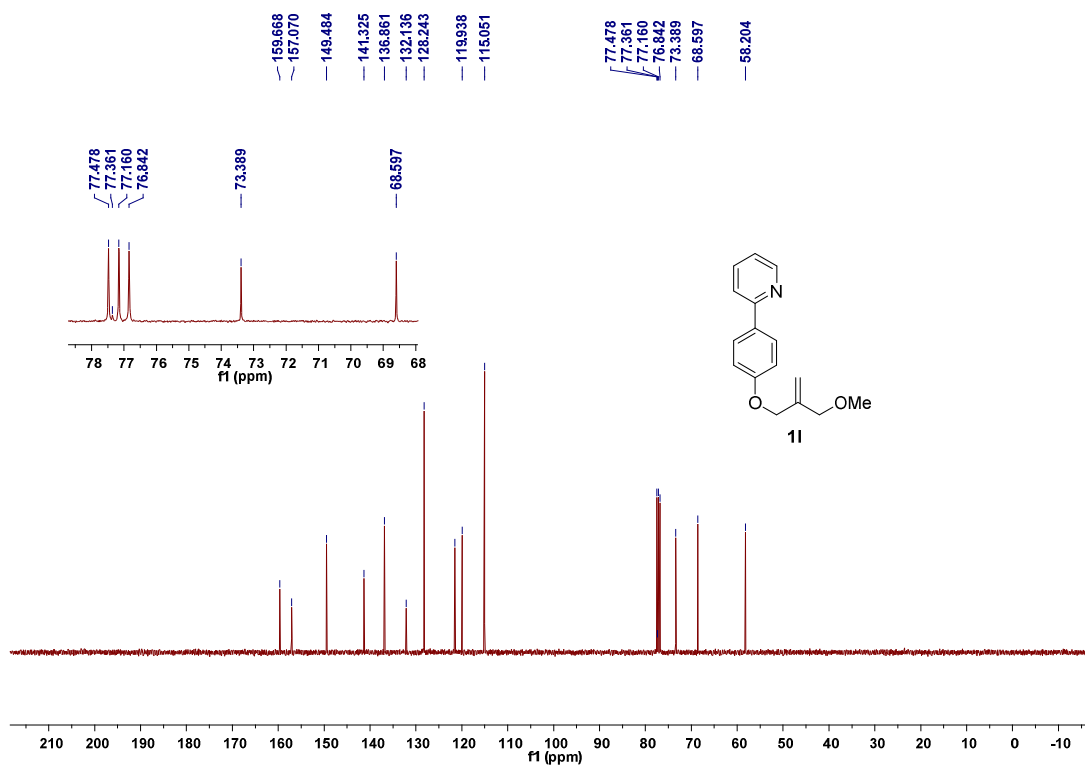

$^1\text{H}$  NMR (600 MHz,  $\text{CDCl}_3$ )

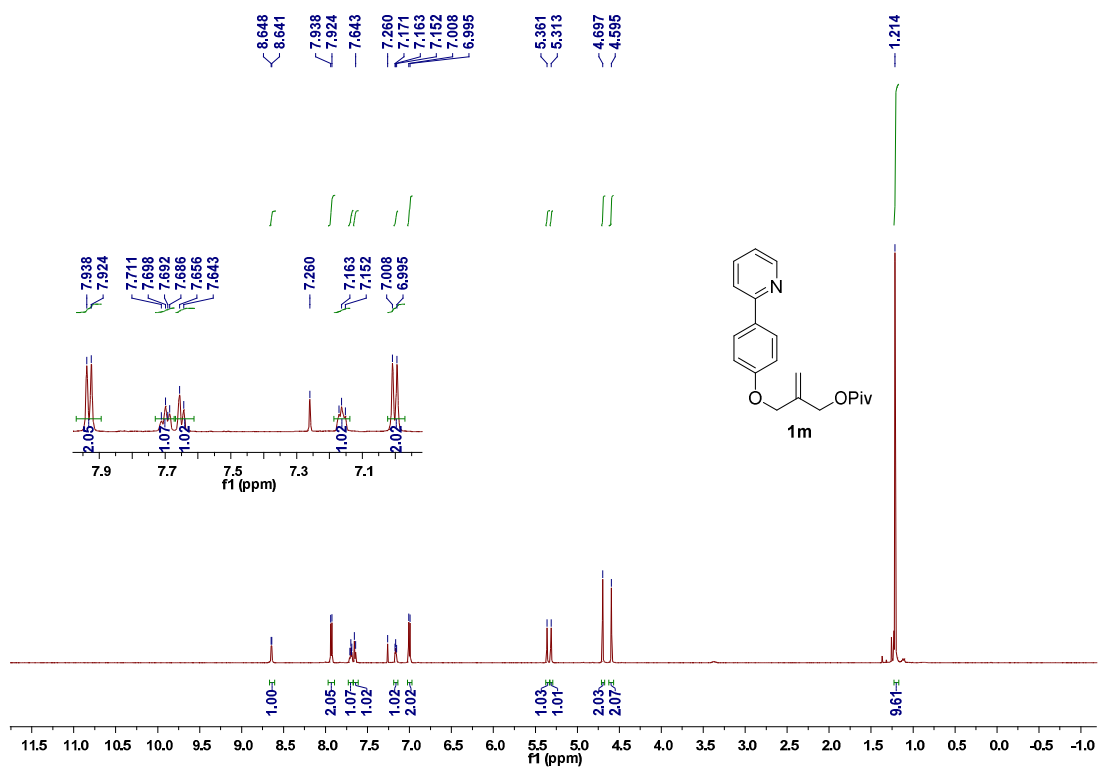



$^{13}\text{C}$  NMR (150 MHz,  $\text{CDCl}_3$ )

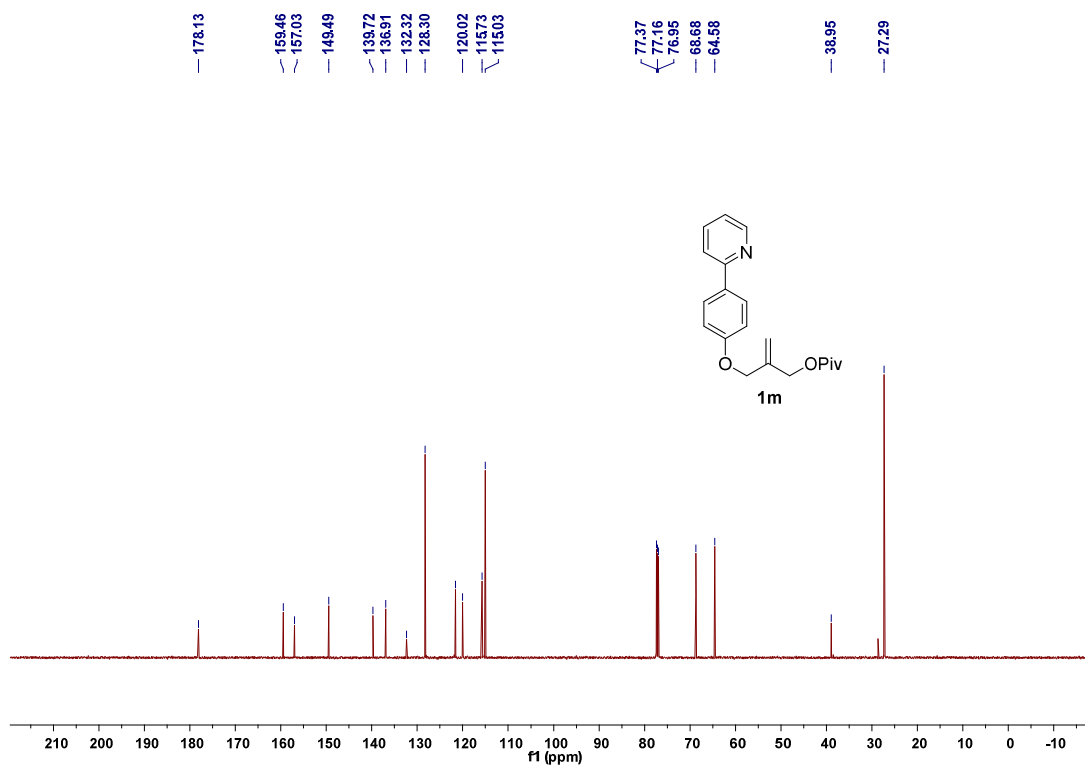

$^1\text{H}$  NMR (600 MHz,  $\text{CDCl}_3$ )

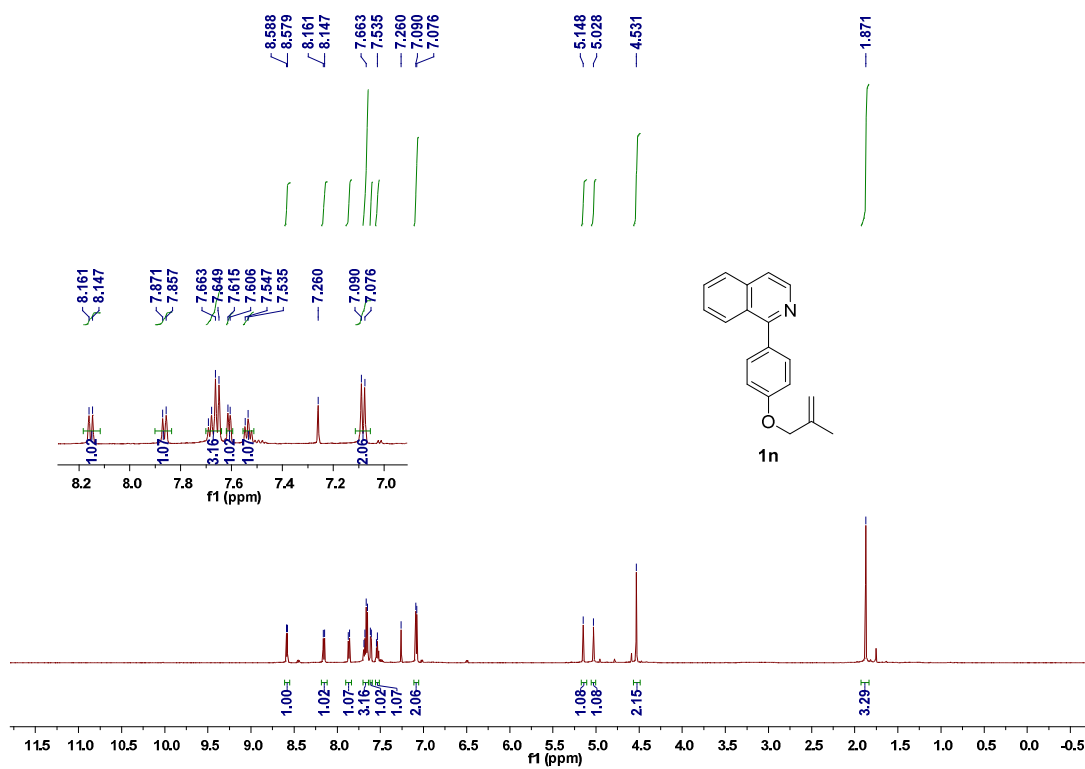

$^{13}\text{C}$  NMR (150 MHz,  $\text{CDCl}_3$ )

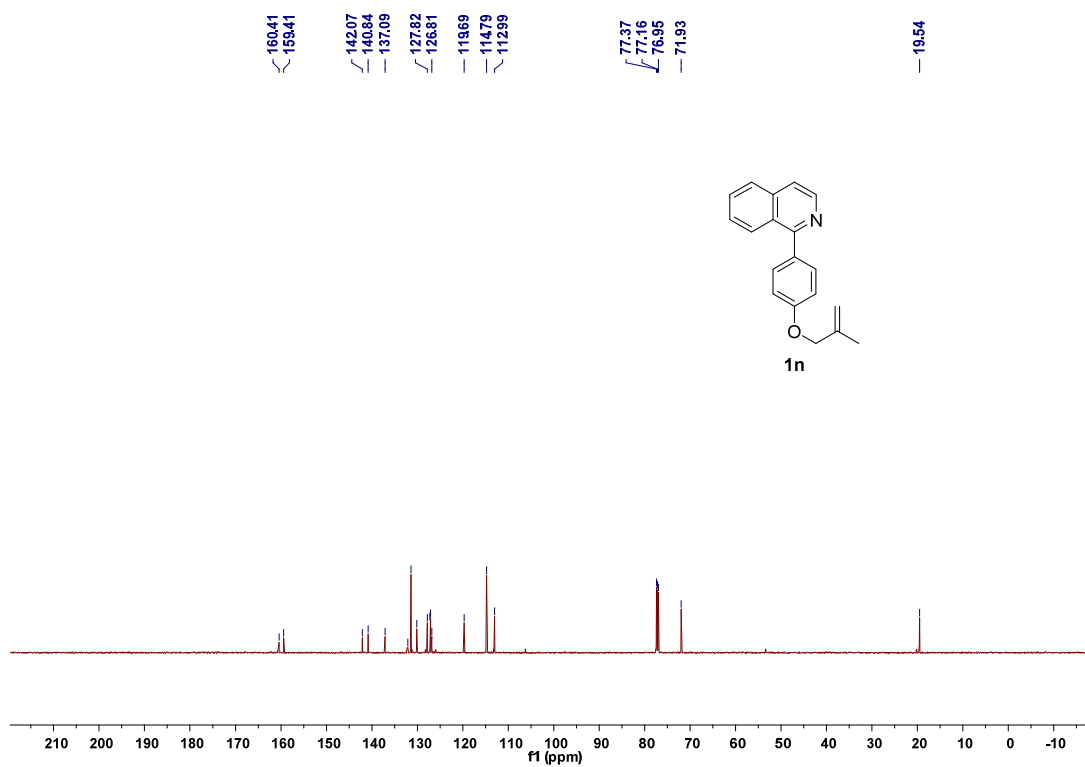

$^1\text{H}$  NMR (400 MHz,  $\text{CDCl}_3$ )

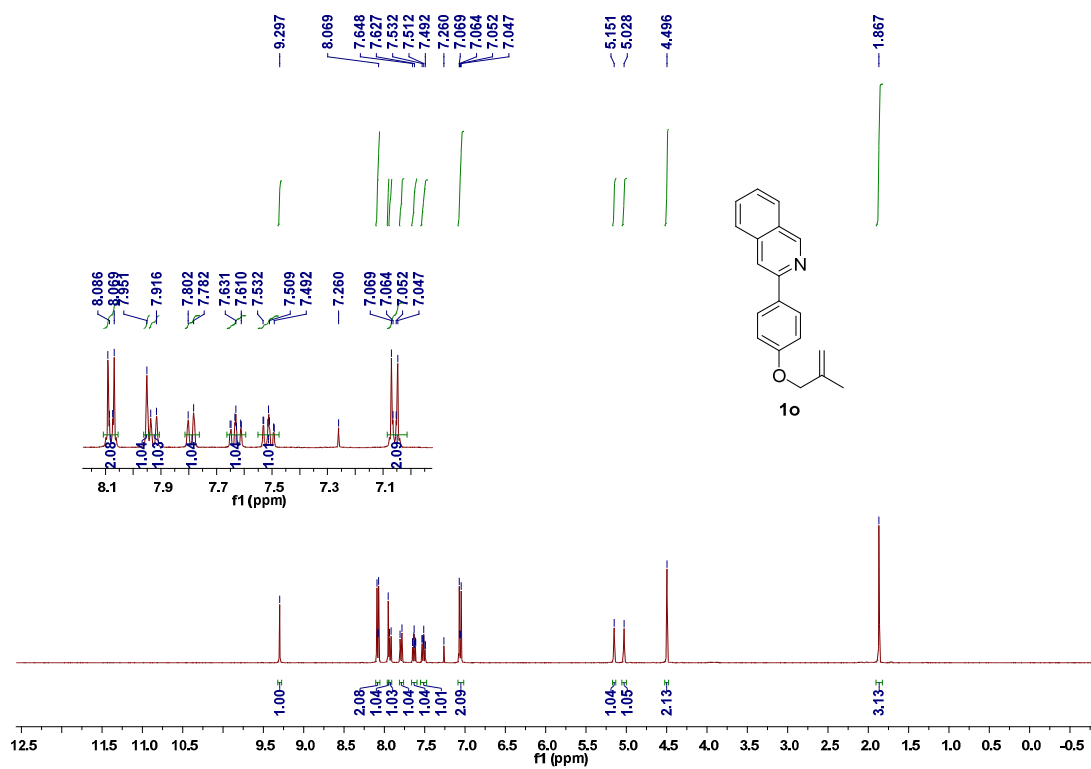

$^{13}\text{C}$  NMR (100 MHz,  $\text{CDCl}_3$ )

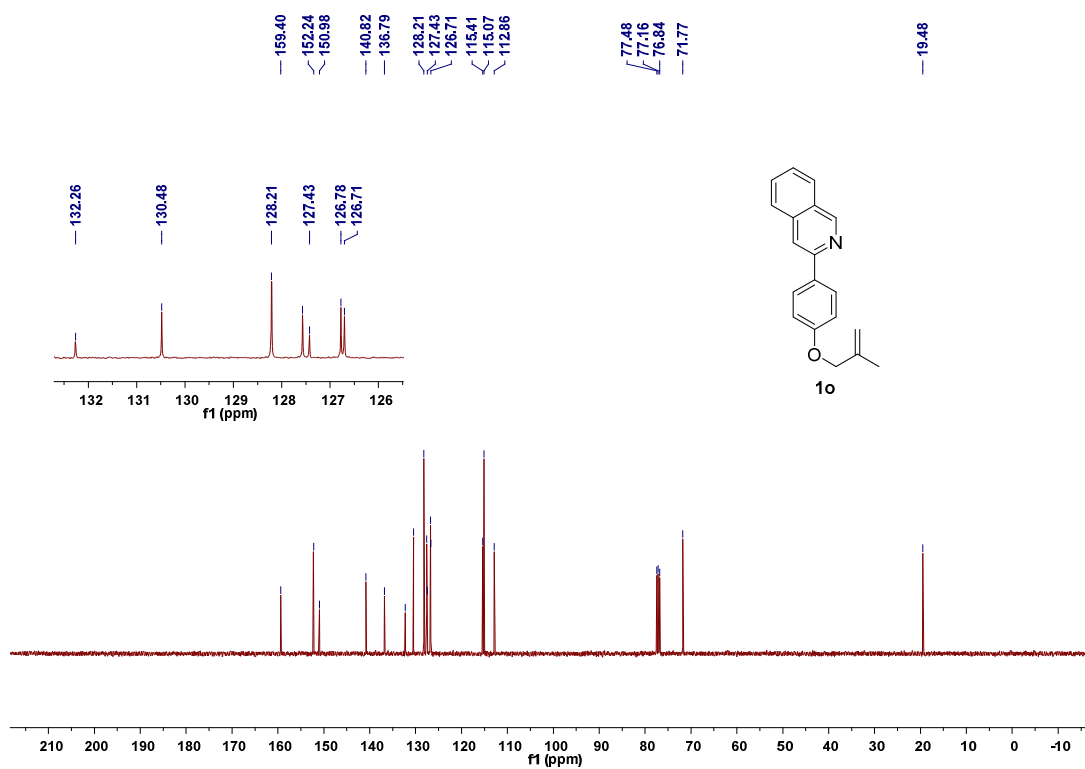

$^1\text{H}$  NMR (600 MHz,  $\text{CDCl}_3$ )

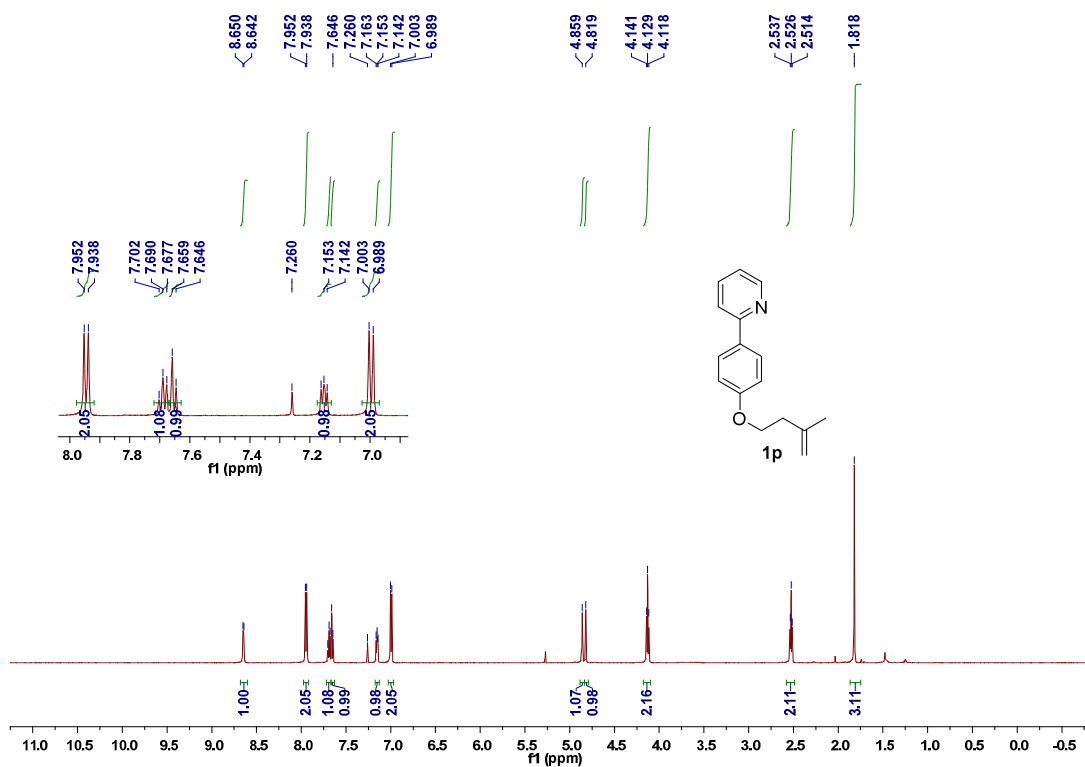

$^{13}\text{C}$  NMR (150 MHz,  $\text{CDCl}_3$ )

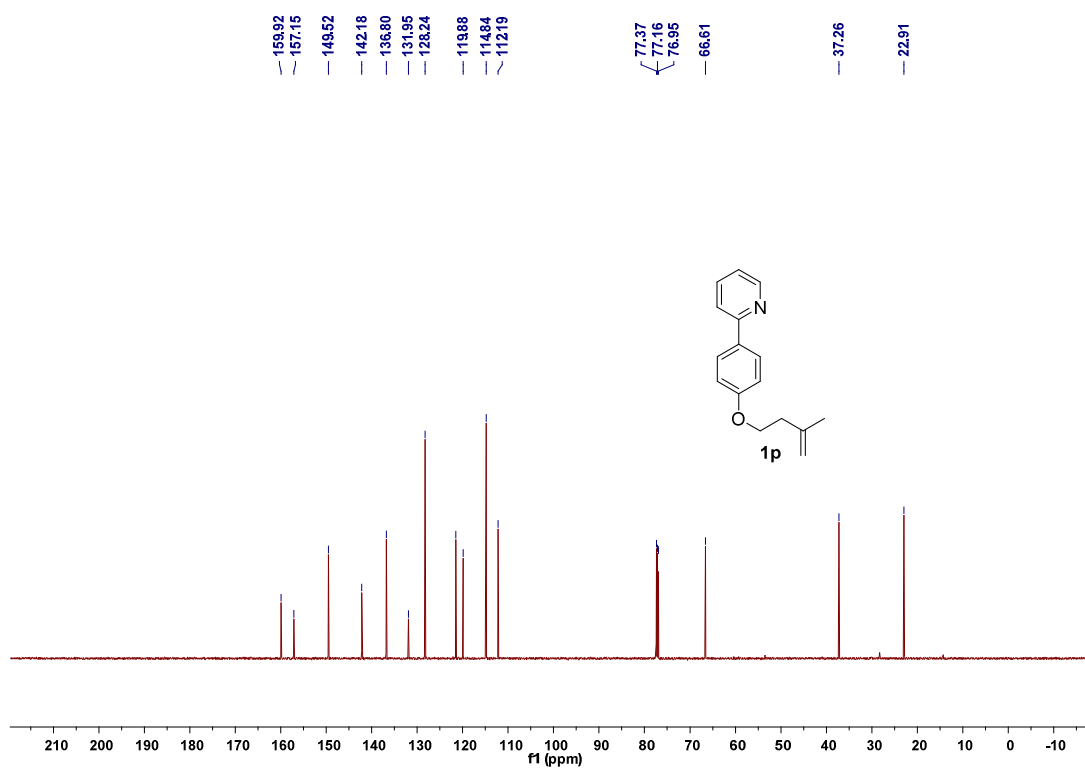

$^1\text{H}$  NMR (600 MHz,  $\text{CDCl}_3$ )

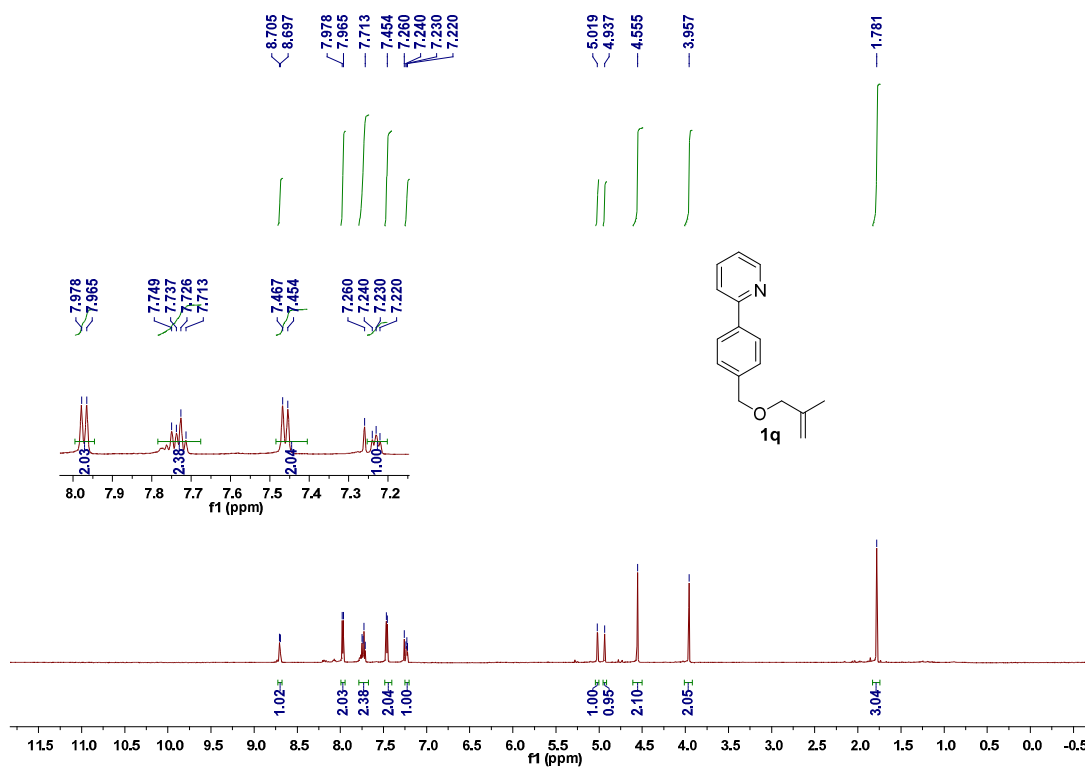

$^{13}\text{C}$  NMR (150 MHz,  $\text{CDCl}_3$ )

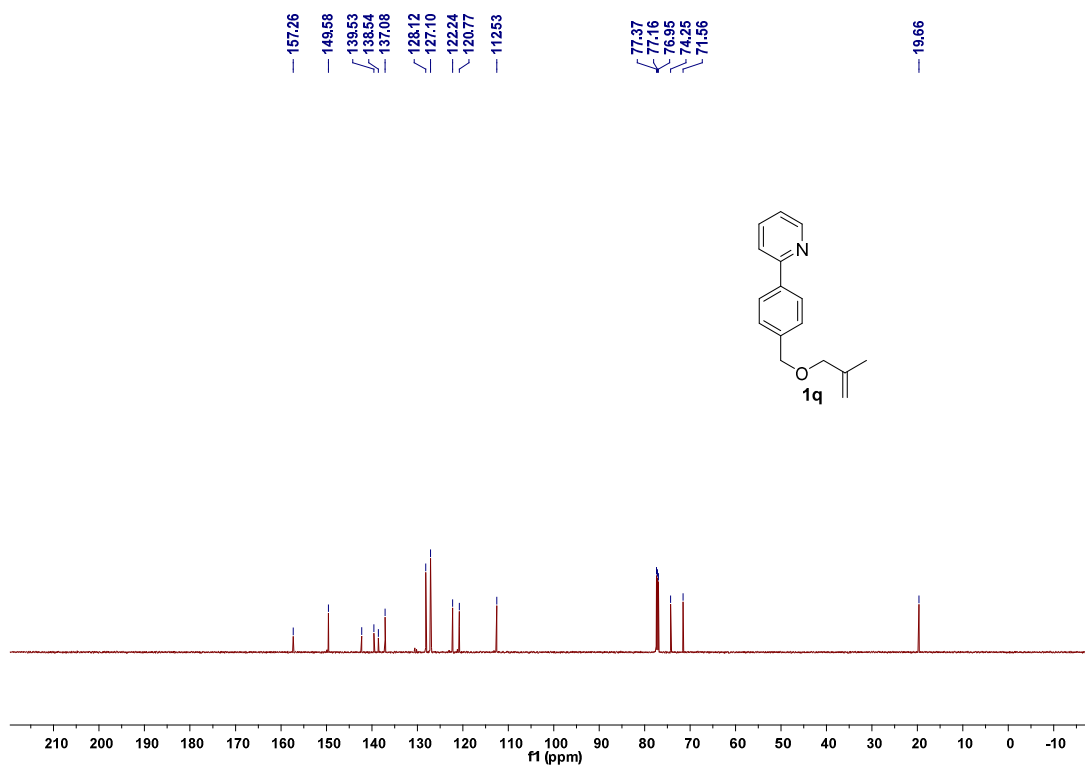

$^1\text{H}$  NMR (600 MHz,  $\text{CDCl}_3$ )

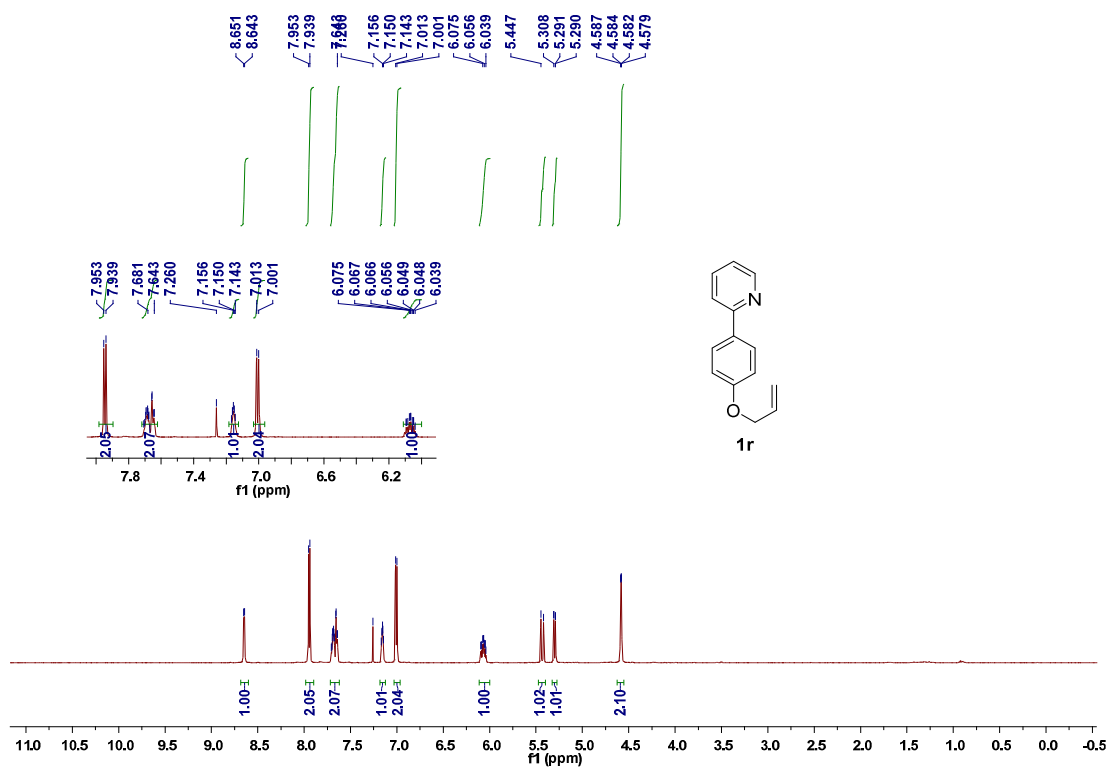

$^{13}\text{C}$  NMR (150 MHz,  $\text{CDCl}_3$ )

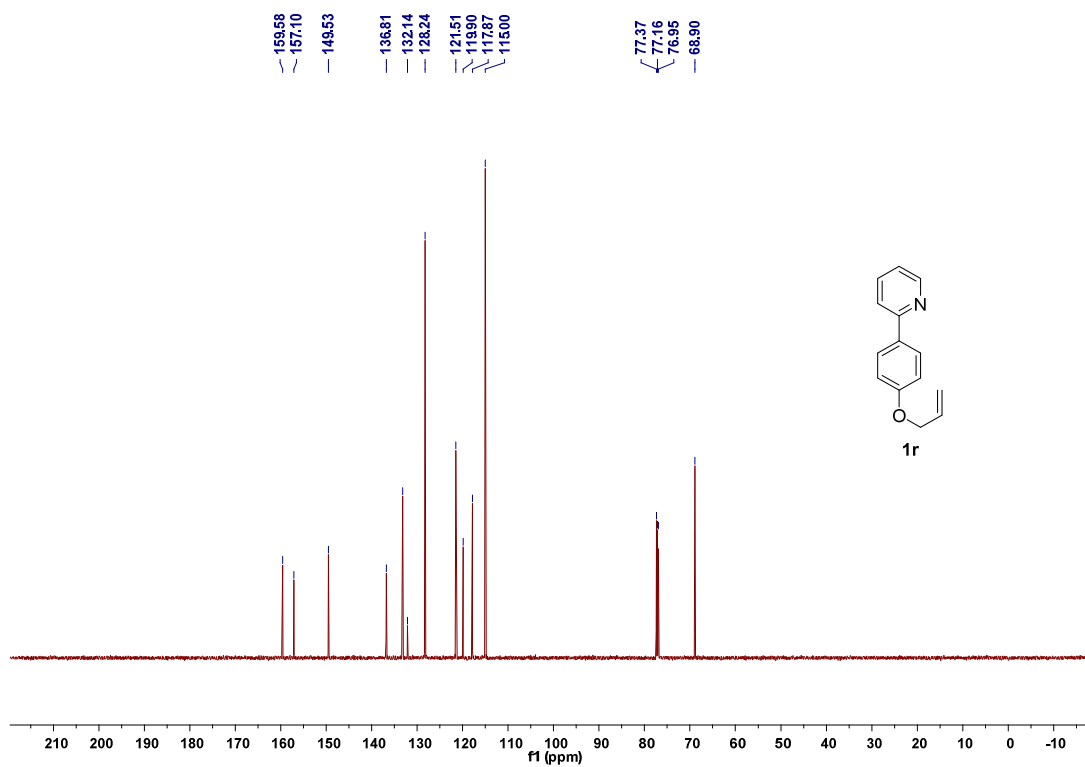

$^1\text{H}$  NMR (400 MHz,  $\text{CDCl}_3$ )

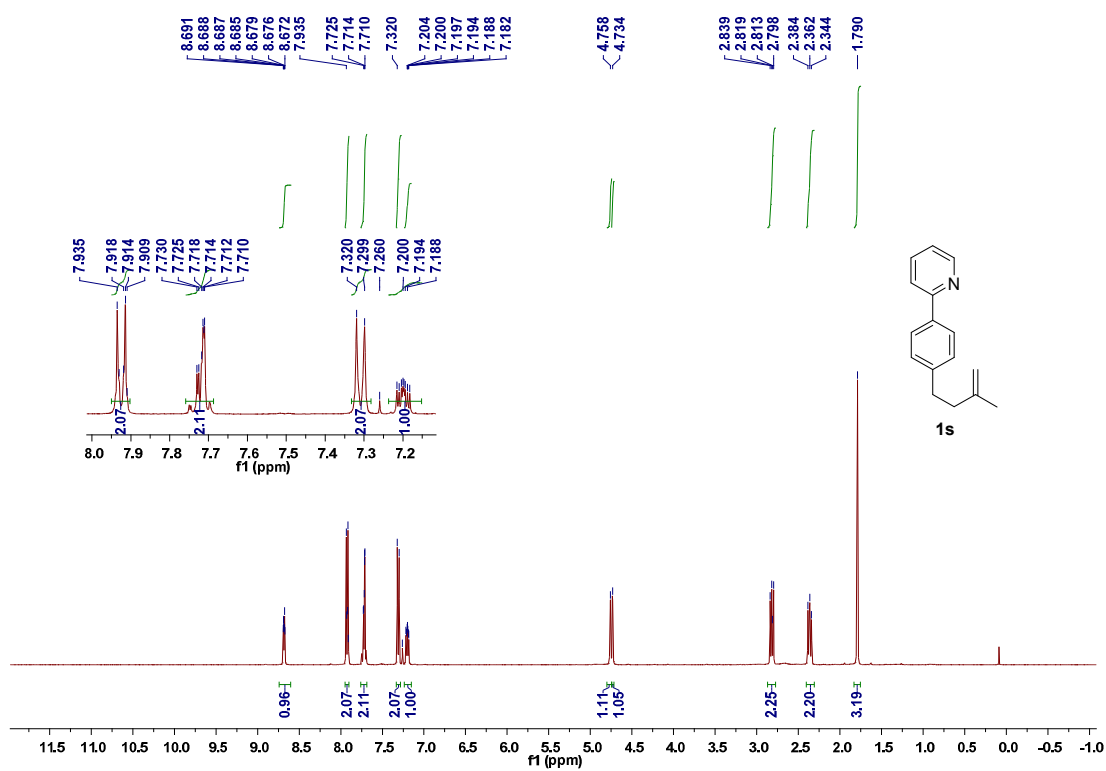

$^{13}\text{C}$  NMR (100 MHz,  $\text{CDCl}_3$ )

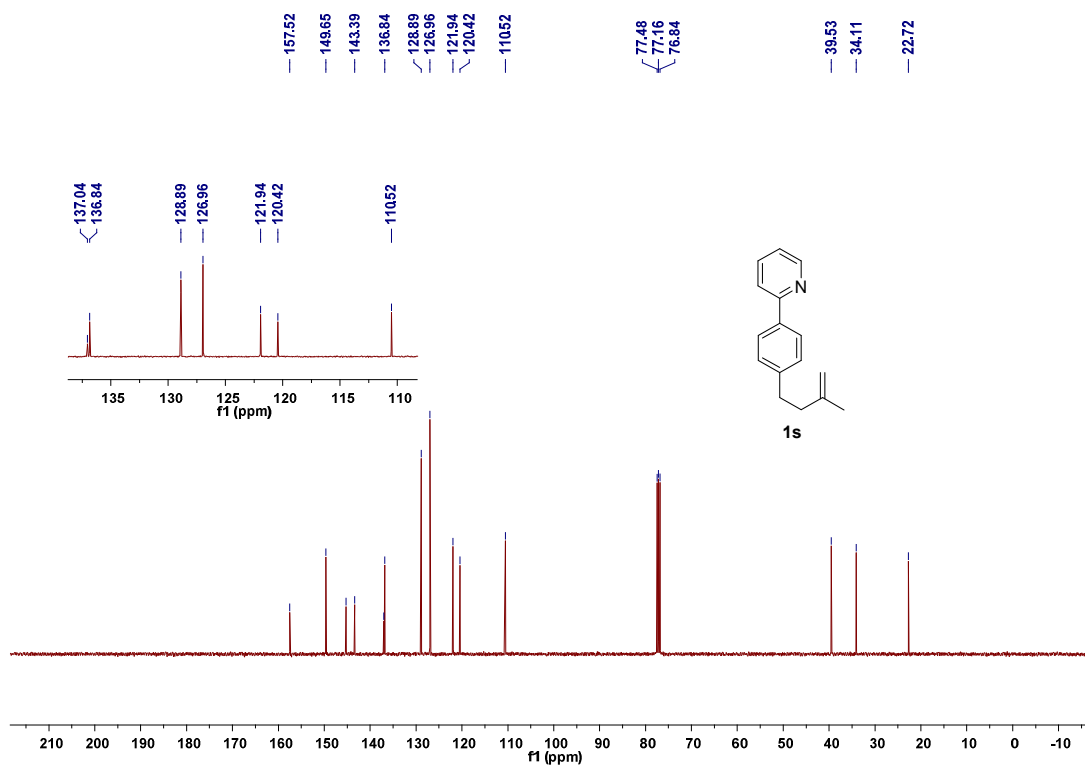

$^1\text{H}$  NMR (600 MHz,  $\text{CDCl}_3$ )

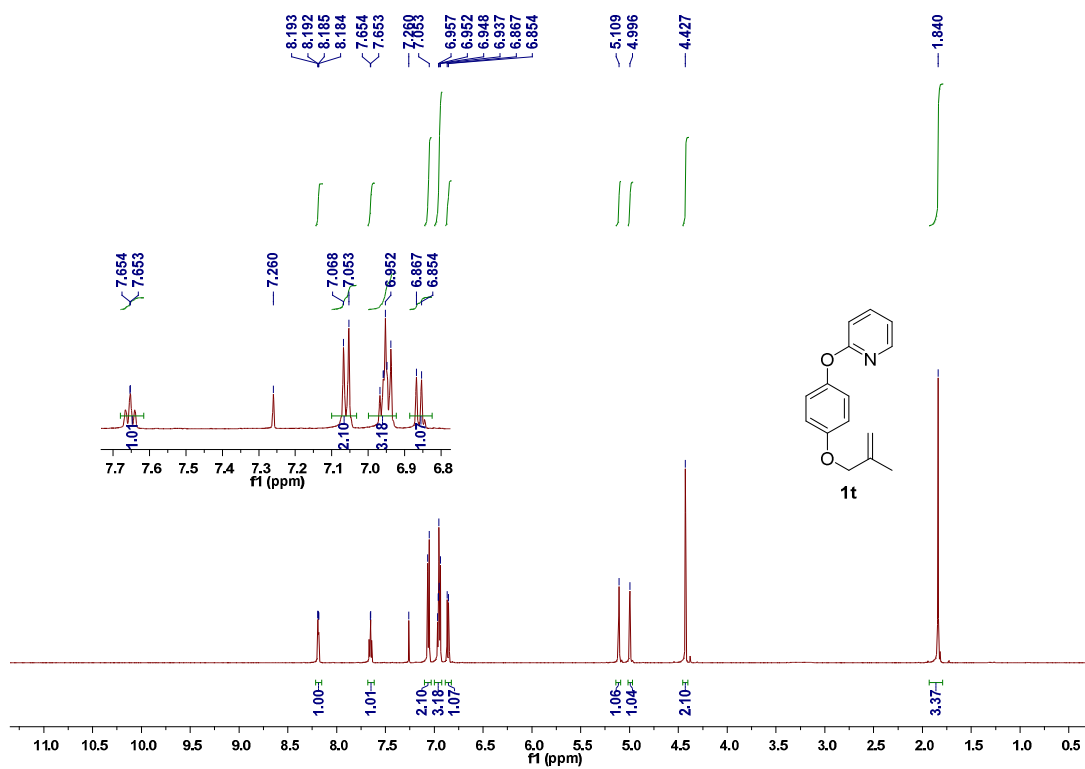

$^{13}\text{C}$  NMR (150 MHz,  $\text{CDCl}_3$ )

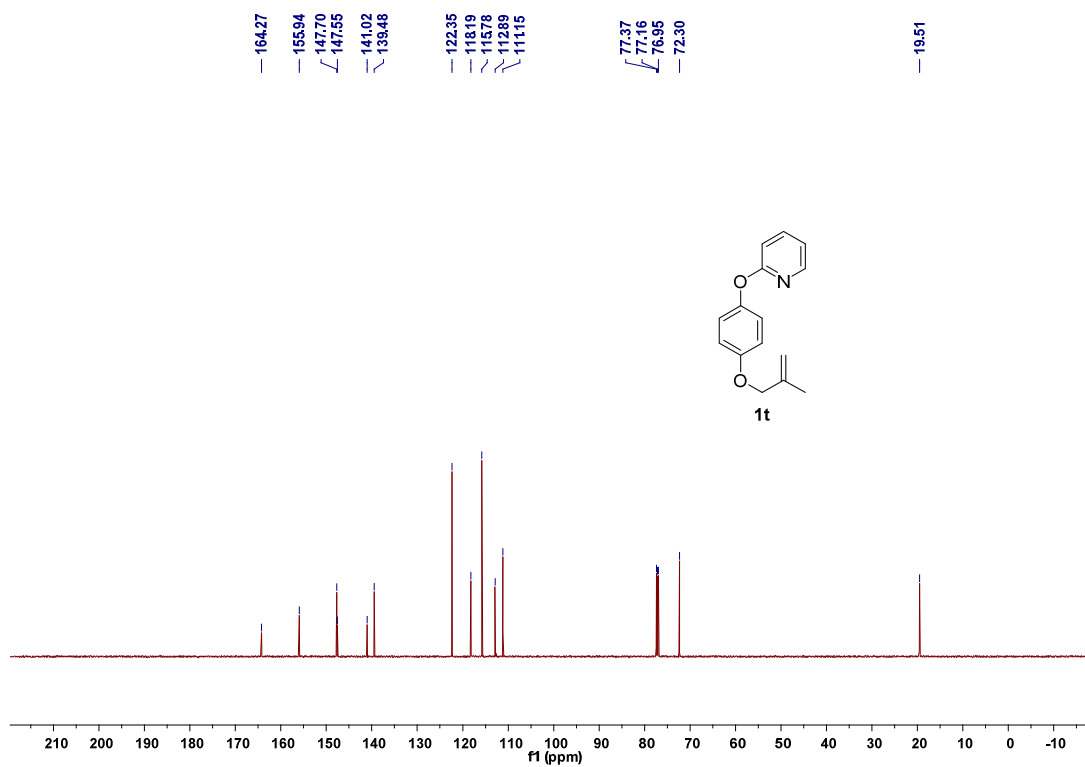

$^1\text{H}$  NMR (600 MHz,  $\text{CDCl}_3$ )

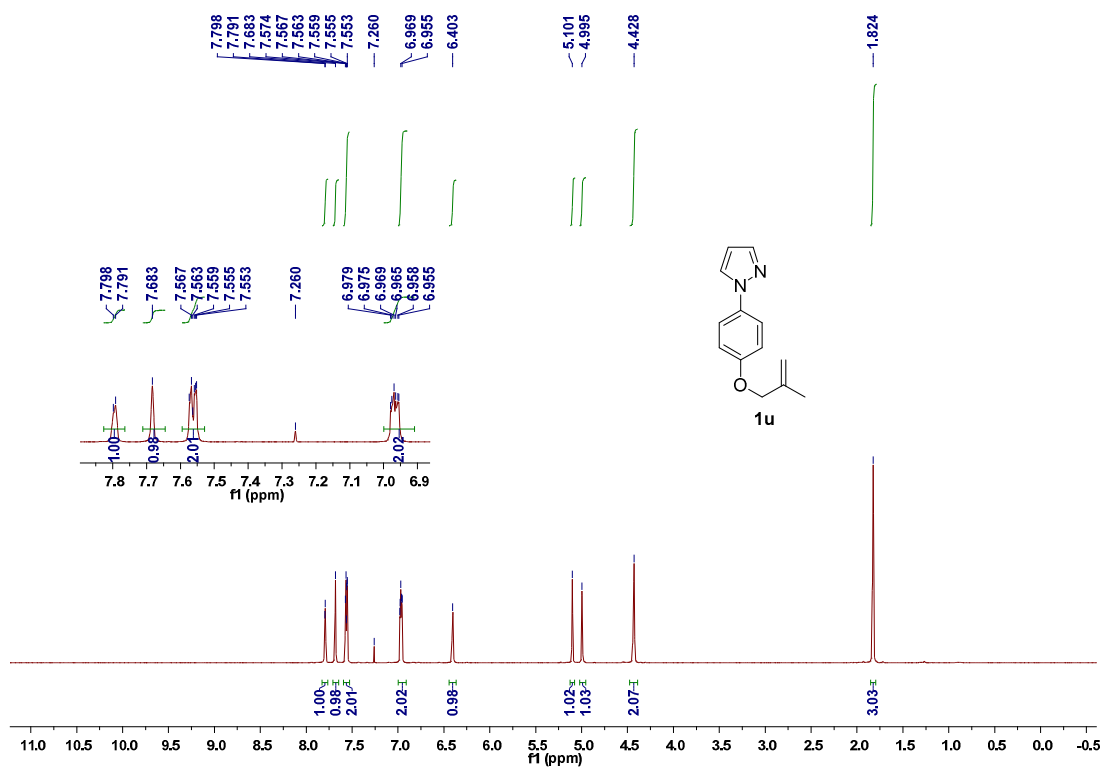



$^{13}\text{C}$  NMR (150 MHz,  $\text{CDCl}_3$ )

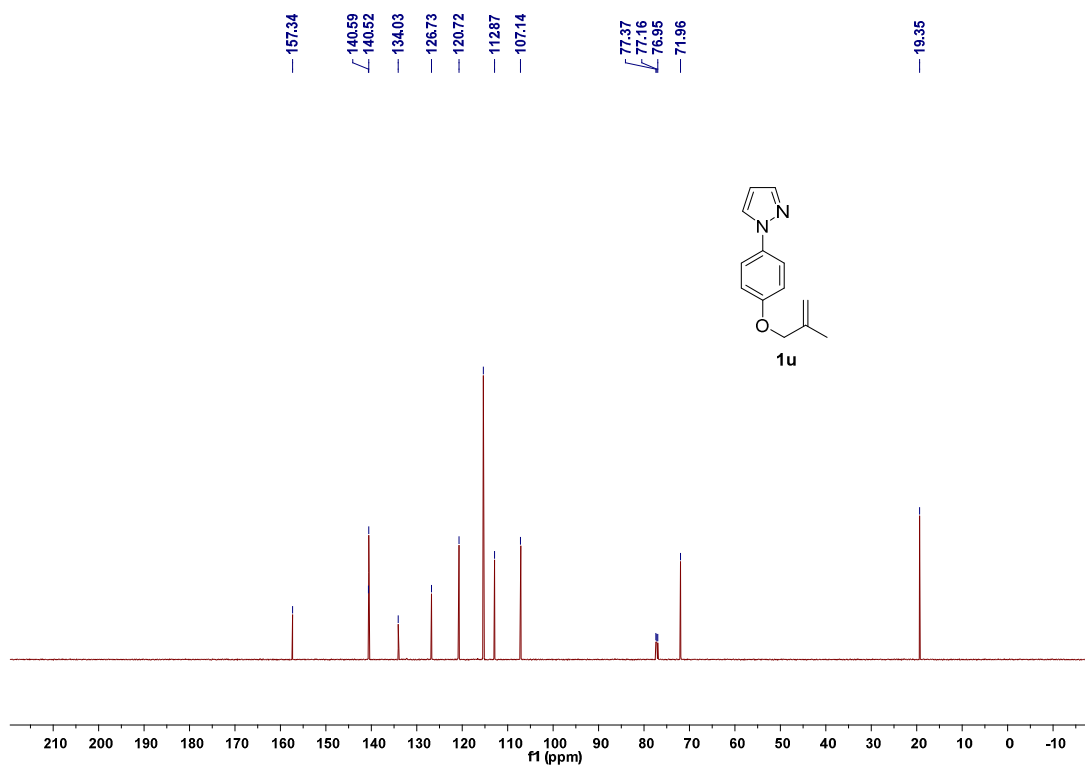

$^1\text{H}$  NMR (600 MHz,  $\text{CDCl}_3$ )

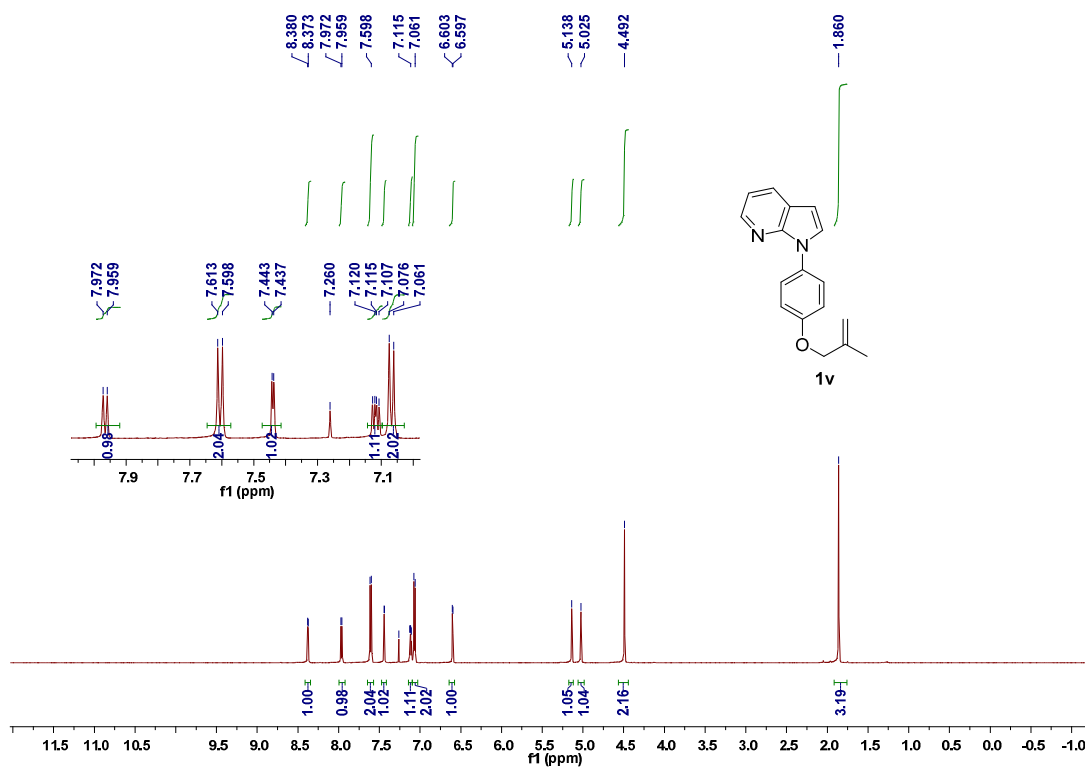

$^{13}\text{C}$  NMR (150 MHz,  $\text{CDCl}_3$ )

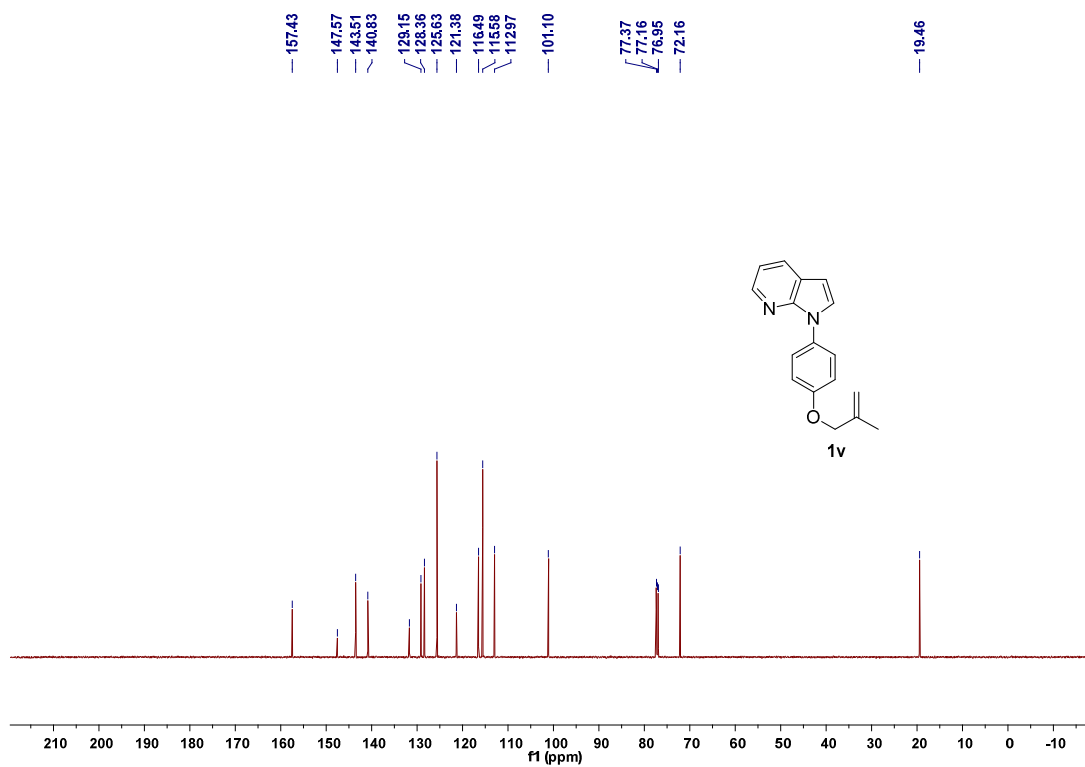

$^1\text{H}$  NMR (600 MHz,  $\text{CDCl}_3$ )

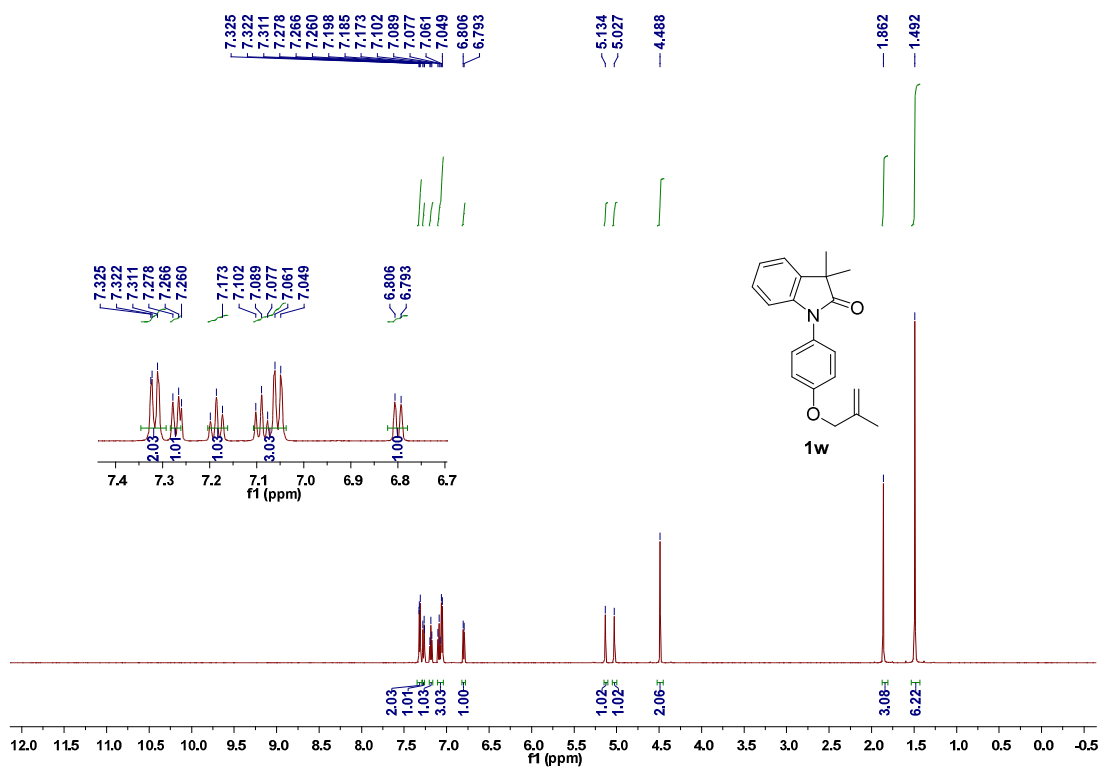

$^{13}\text{C}$  NMR (150 MHz,  $\text{CDCl}_3$ )

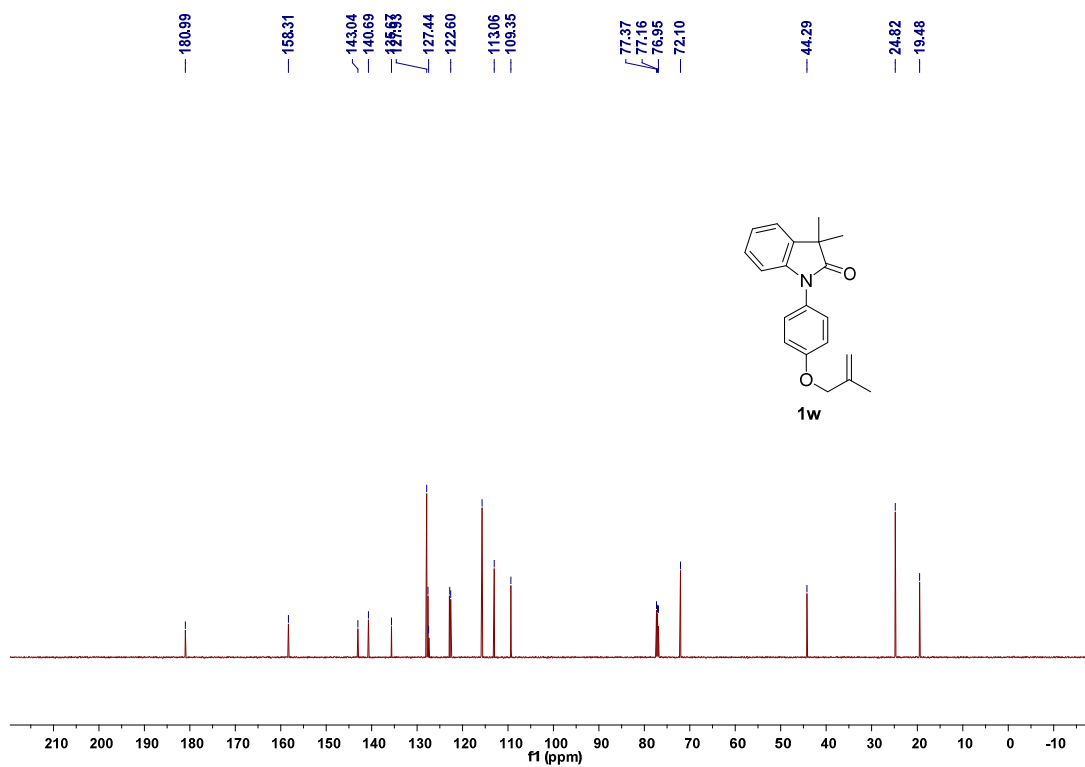

$^1\text{H}$  NMR (400 MHz,  $\text{CDCl}_3$ )

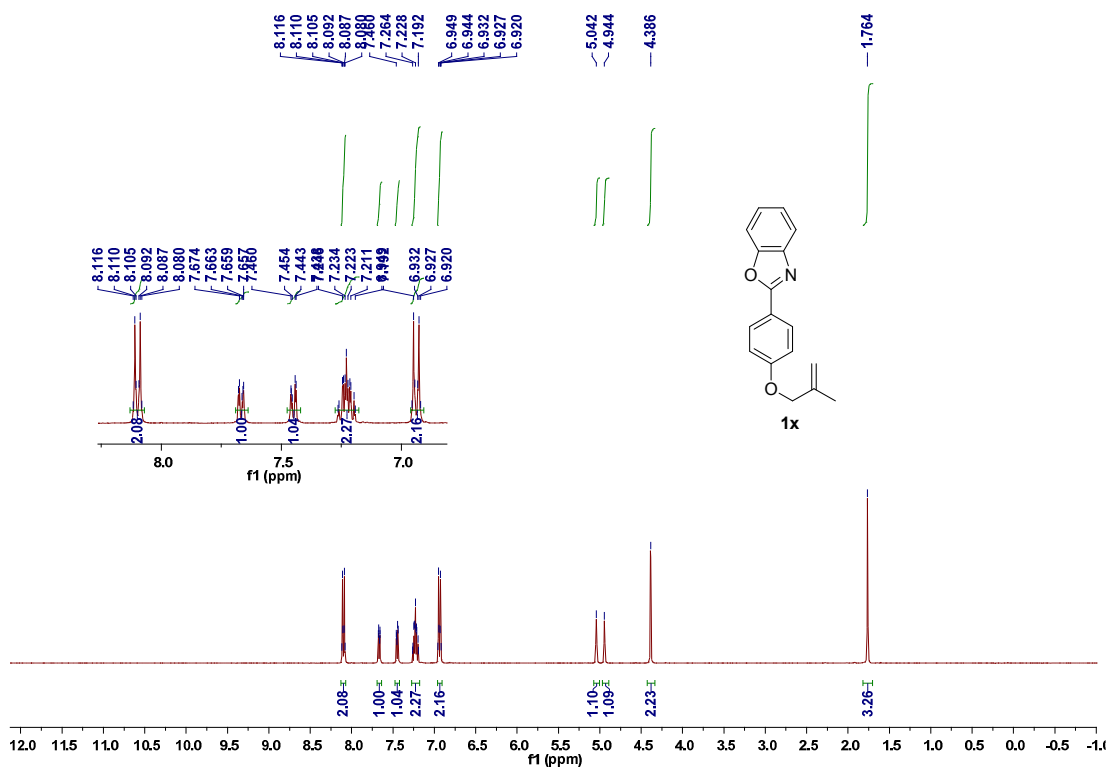

$^{13}\text{C}$  NMR (100 MHz,  $\text{CDCl}_3$ )

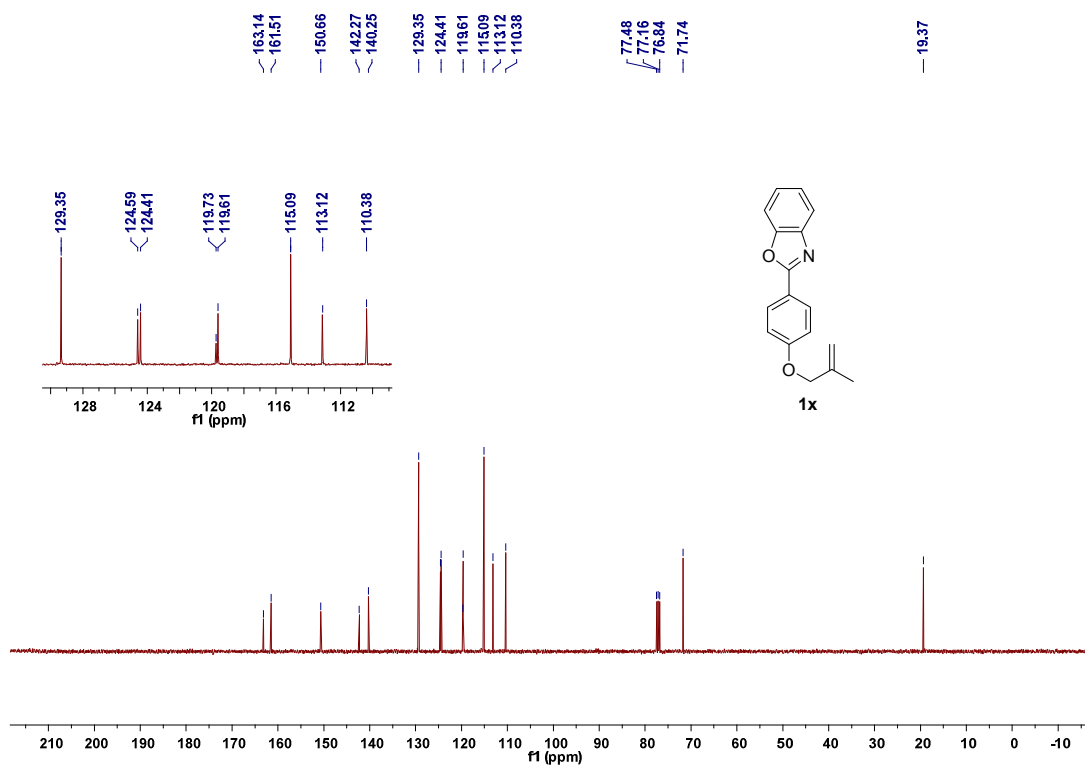

$^1\text{H}$  NMR (400 MHz,  $\text{CDCl}_3$ )

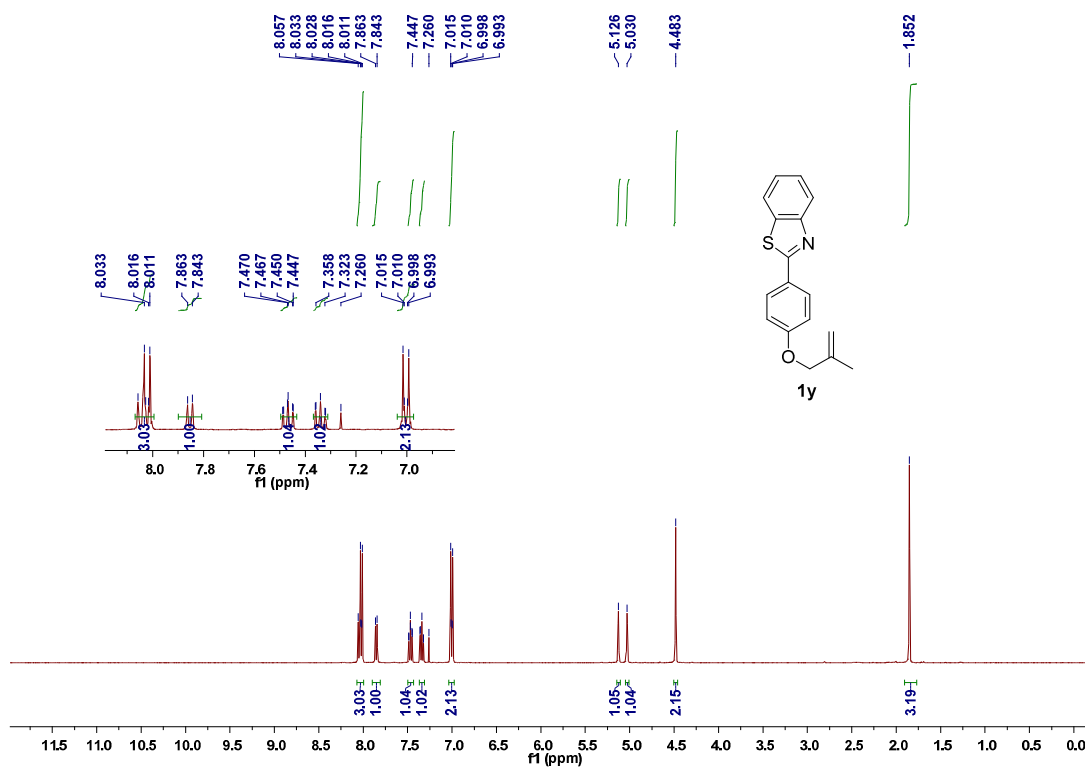

$^{13}\text{C}$  NMR (100 MHz,  $\text{CDCl}_3$ )

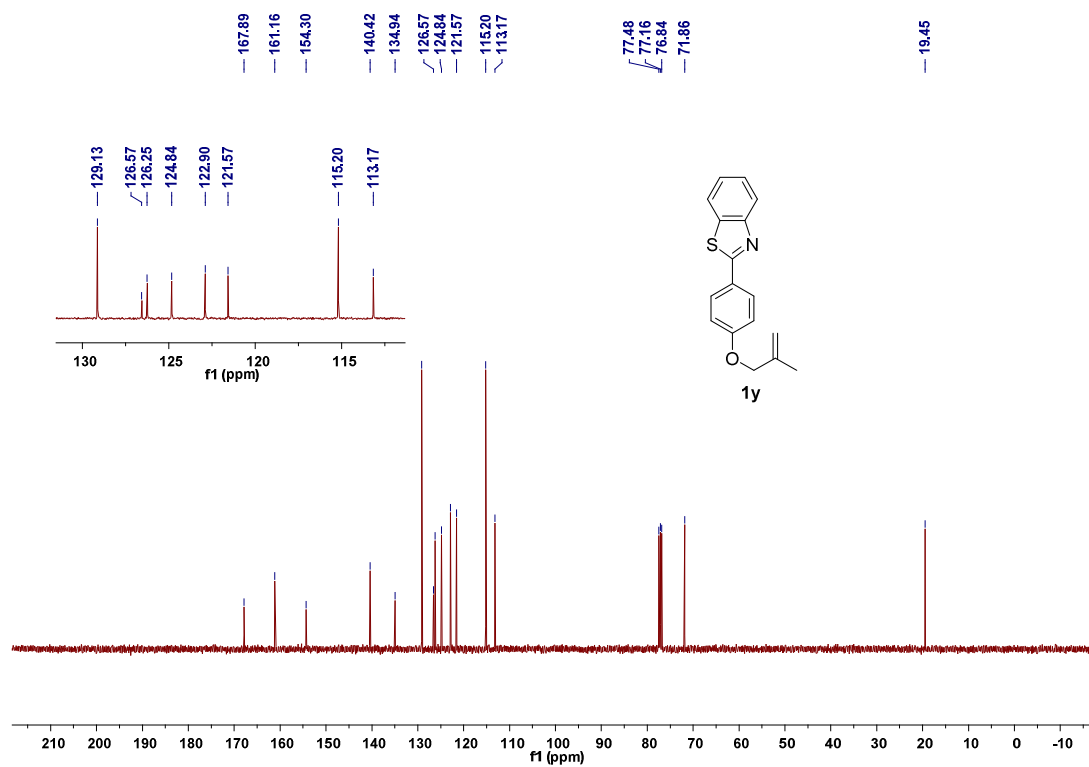

$^1\text{H}$  NMR (600 MHz,  $\text{CDCl}_3$ )

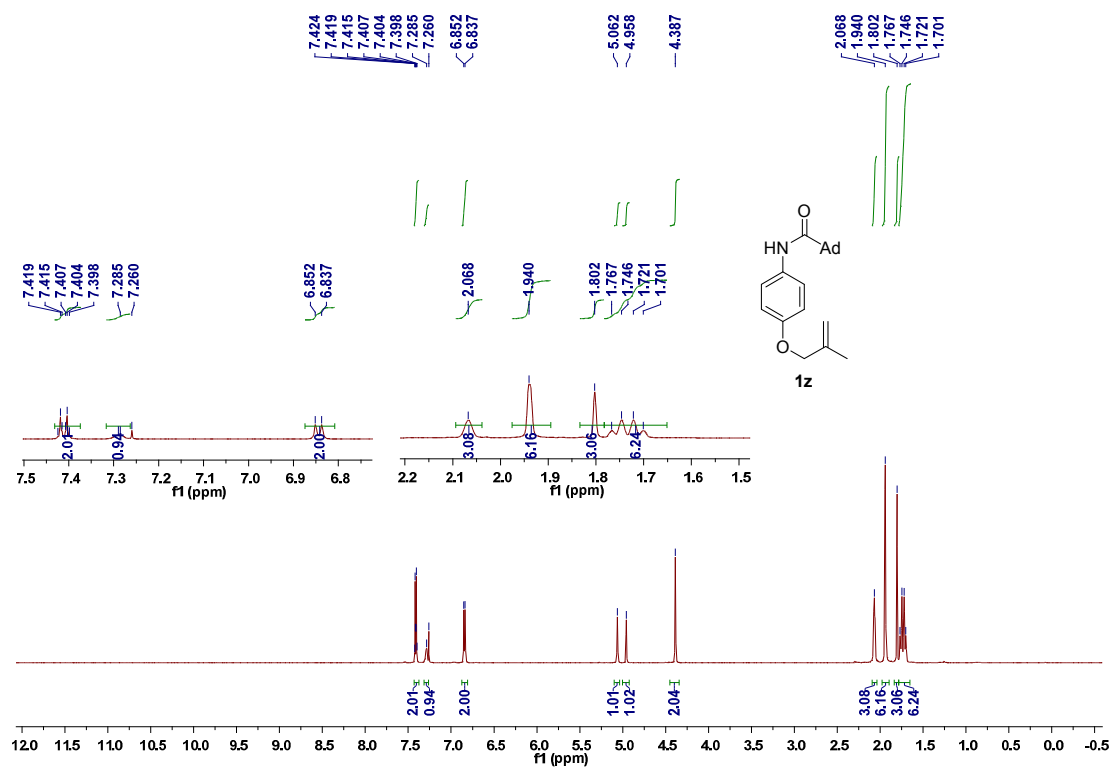

$^{13}\text{C}$  NMR (150 MHz,  $\text{CDCl}_3$ )

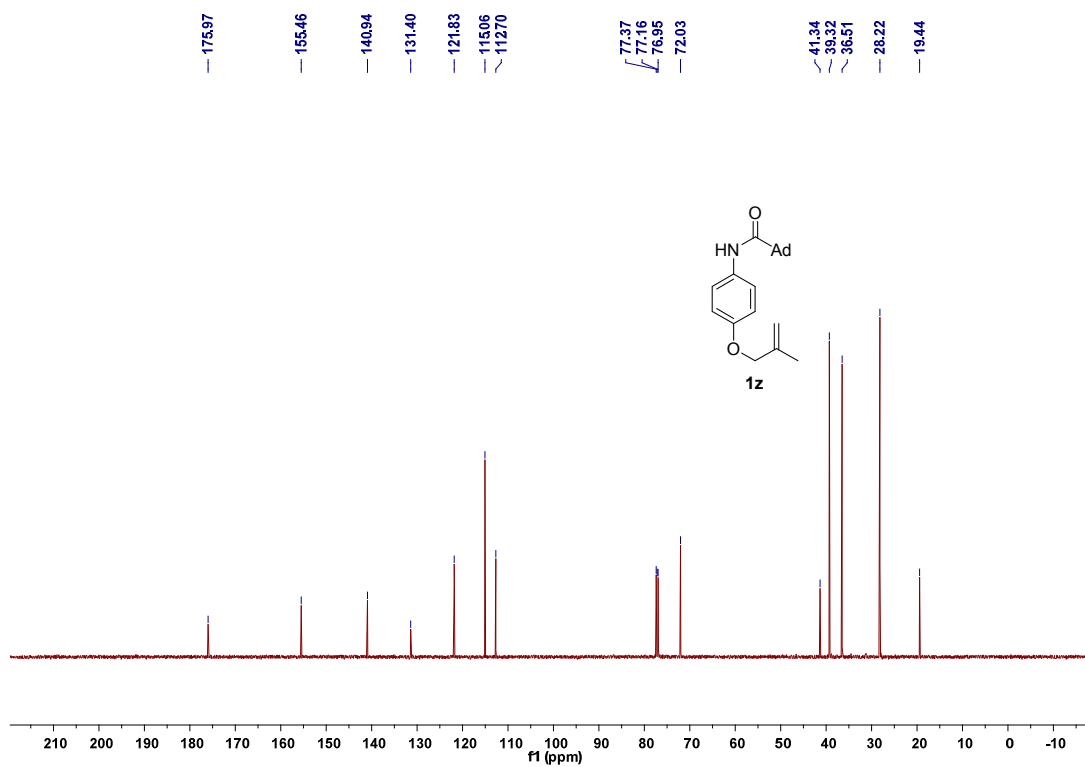

$^1\text{H}$  NMR (400 MHz,  $\text{CDCl}_3$ )

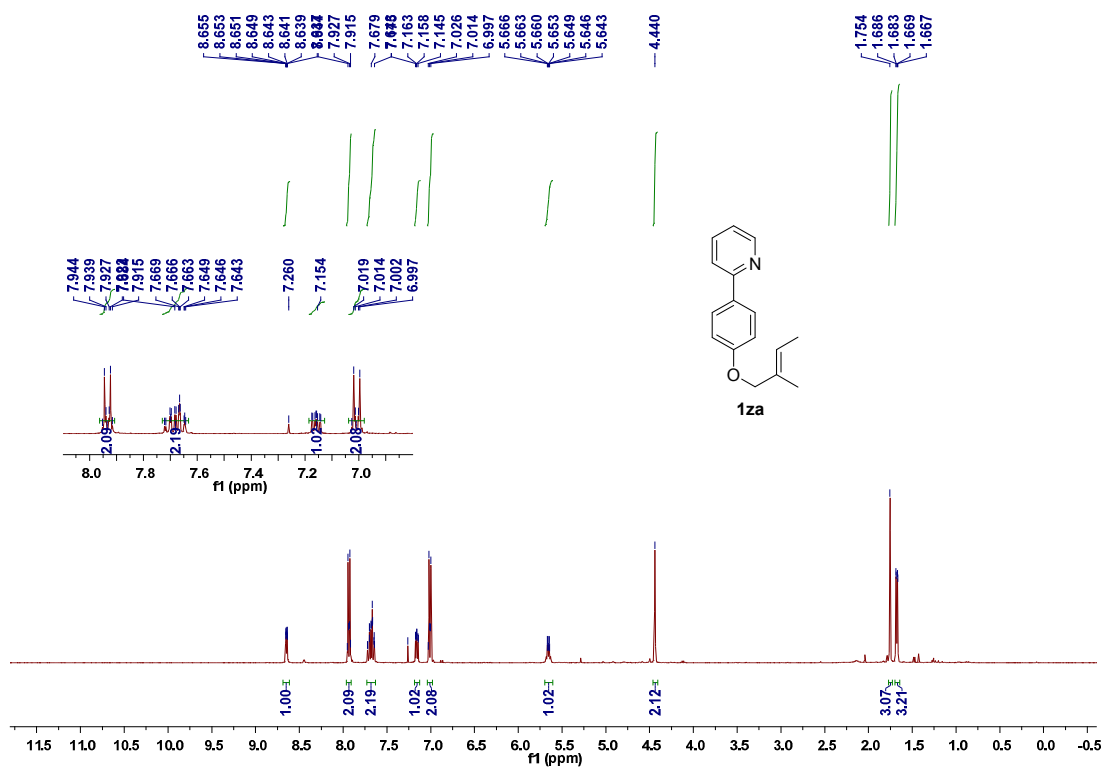

$^{13}\text{C}$  NMR (100 MHz,  $\text{CDCl}_3$ )

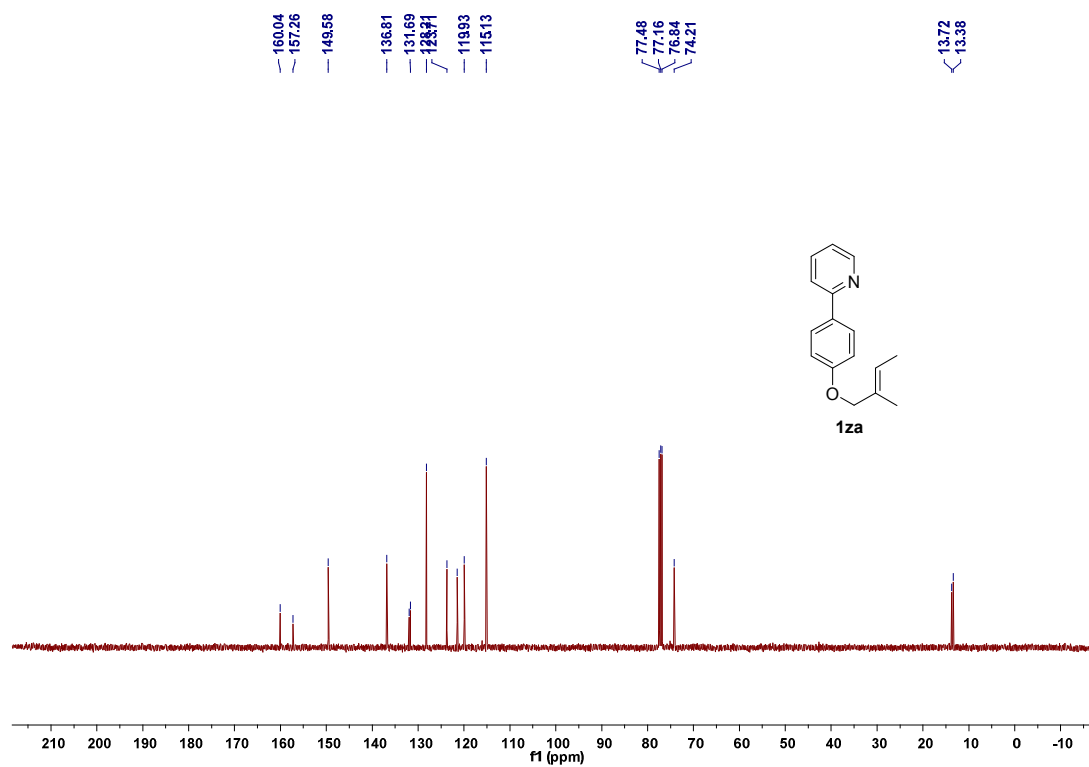

$^1\text{H}$  NMR (600 MHz,  $\text{CDCl}_3$ )

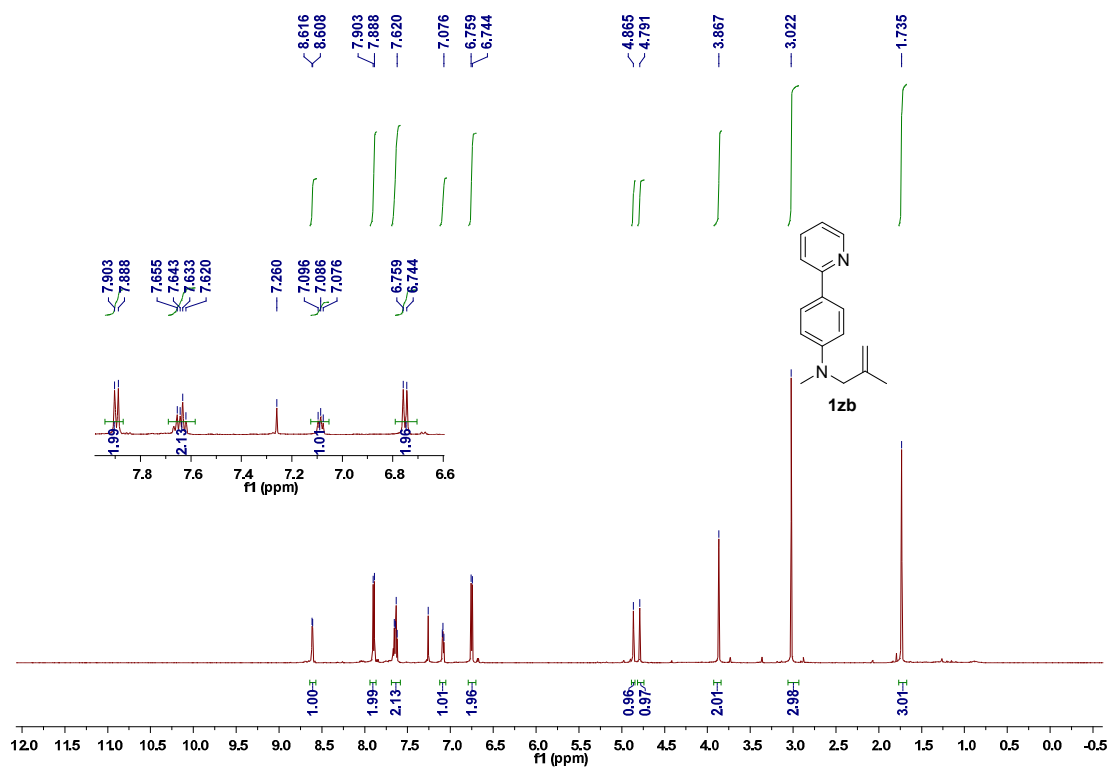

$^{13}\text{C}$  NMR (150 MHz,  $\text{CDCl}_3$ )

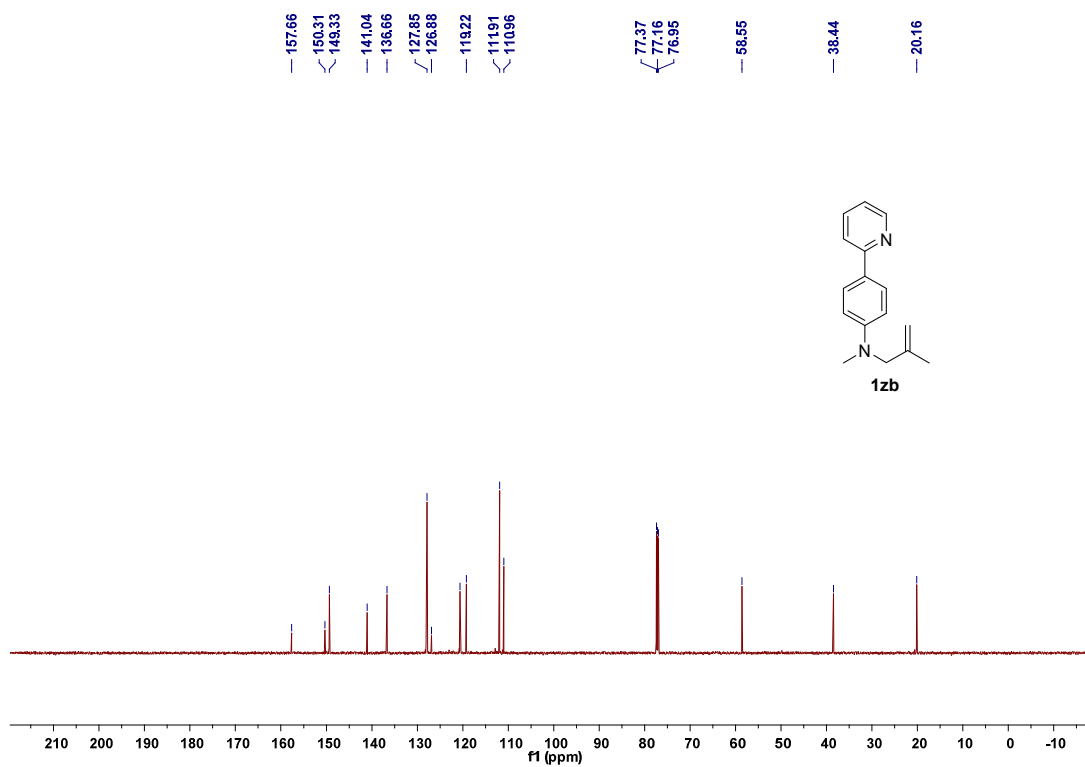

$^1\text{H}$  NMR (600 MHz,  $\text{CDCl}_3$ )

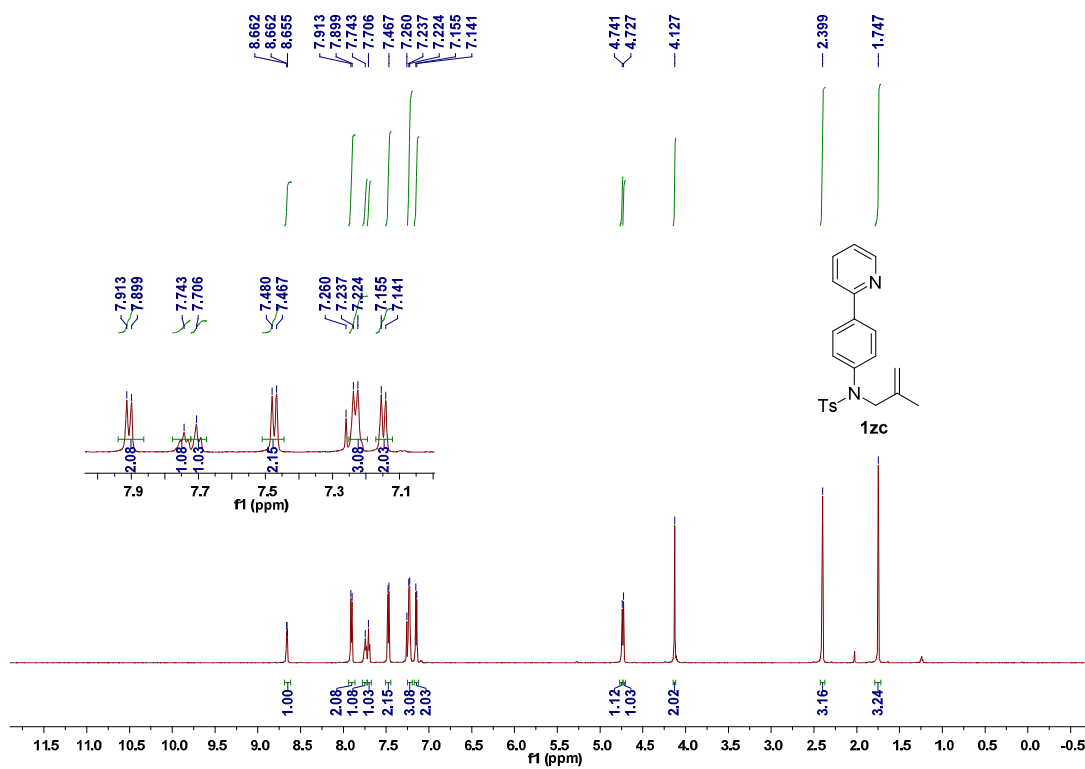



$^{13}\text{C}$  NMR (150 MHz,  $\text{CDCl}_3$ )

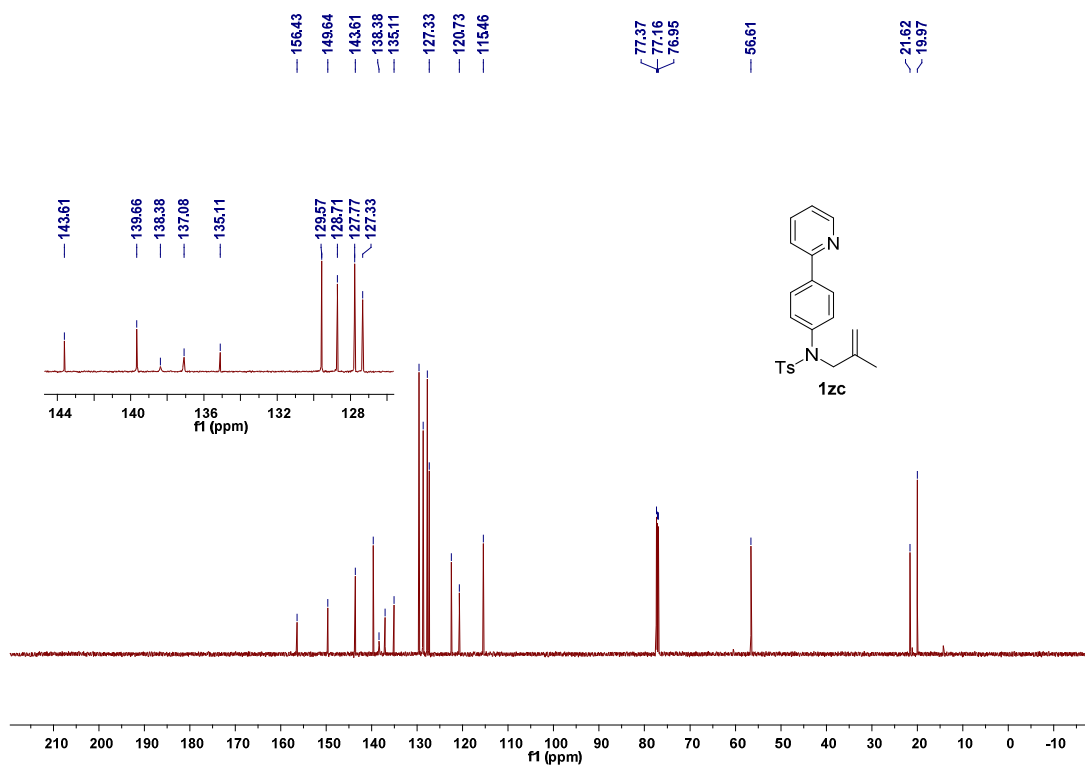

$^1\text{H}$  NMR (600 MHz,  $\text{CDCl}_3$ )

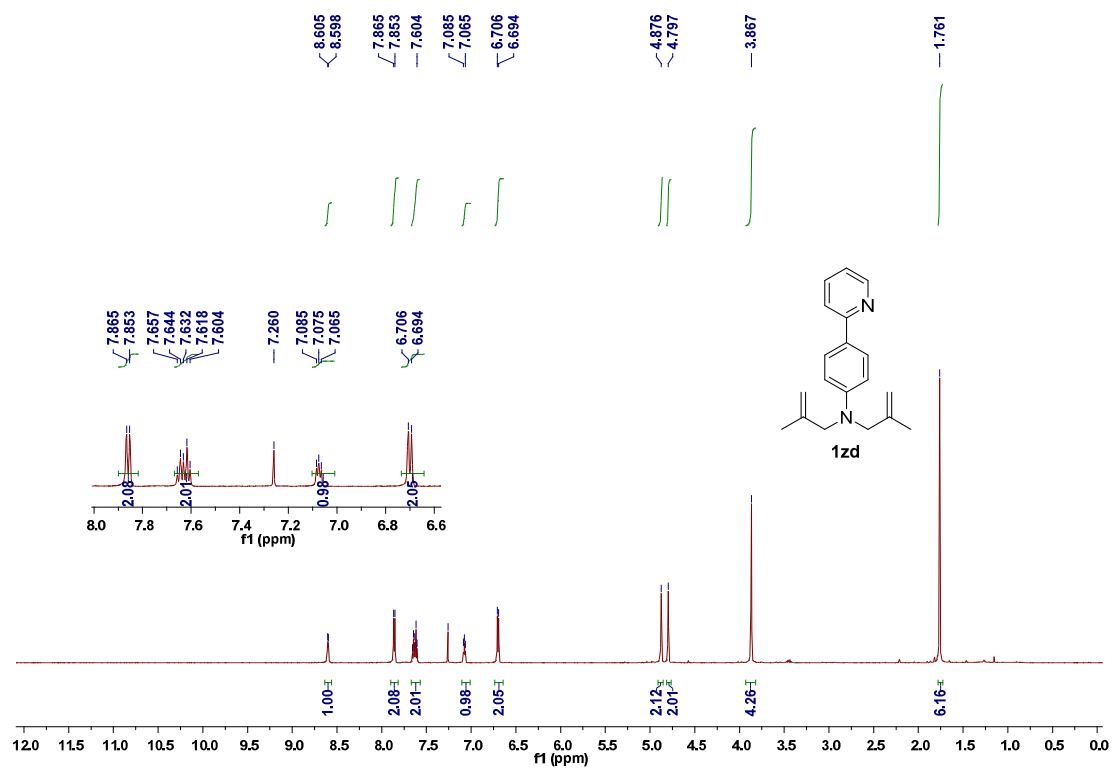

$^{13}\text{C}$  NMR (150 MHz,  $\text{CDCl}_3$ )

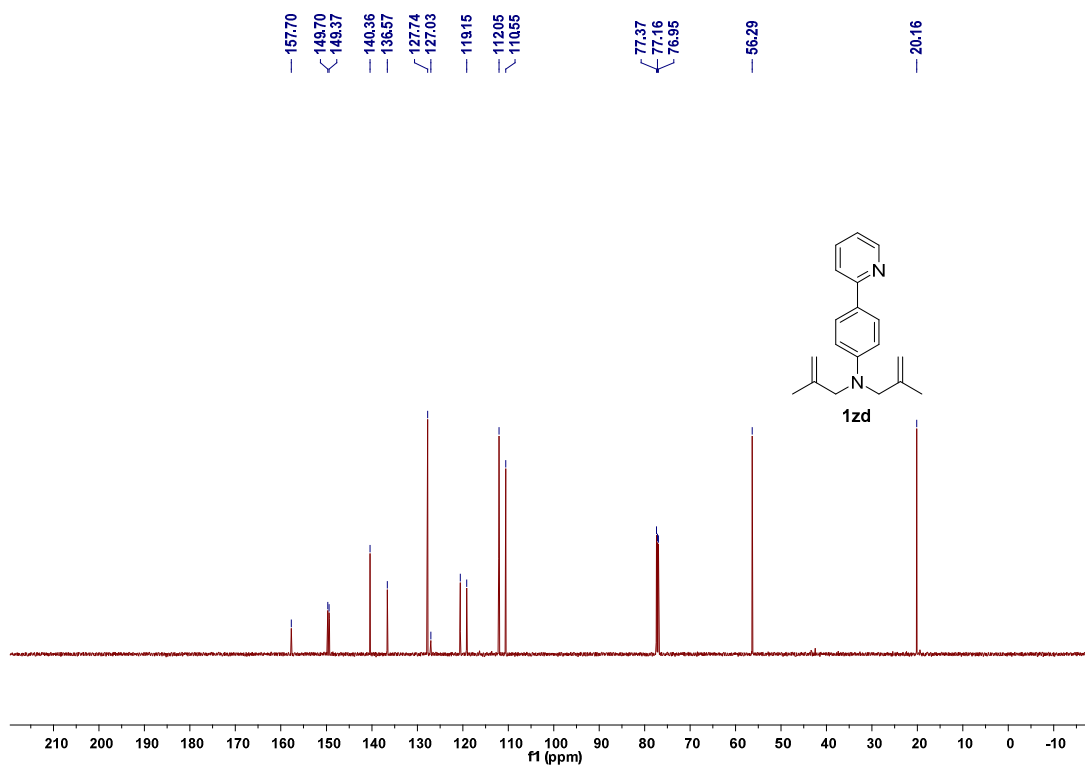

$^1\text{H}$  NMR (400 MHz,  $\text{CDCl}_3$ )

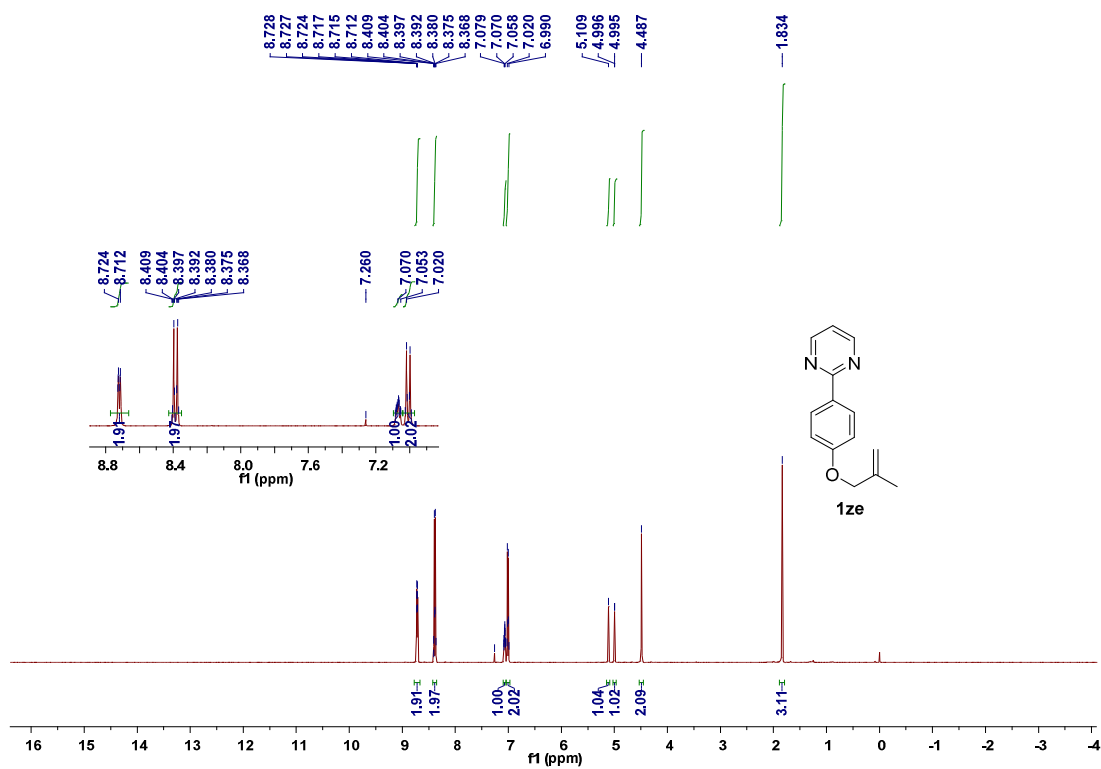

$^{13}\text{C}$  NMR (100 MHz,  $\text{CDCl}_3$ )

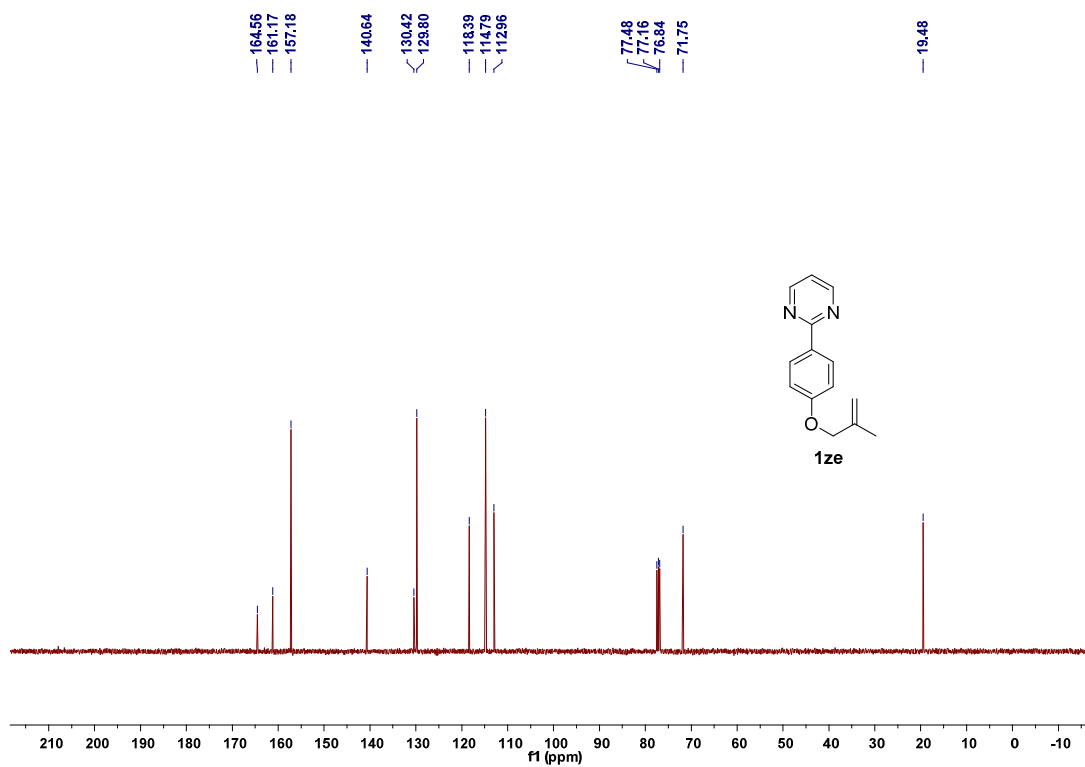

<sup>1</sup>H NMR (600 MHz, CDCl<sub>3</sub>)

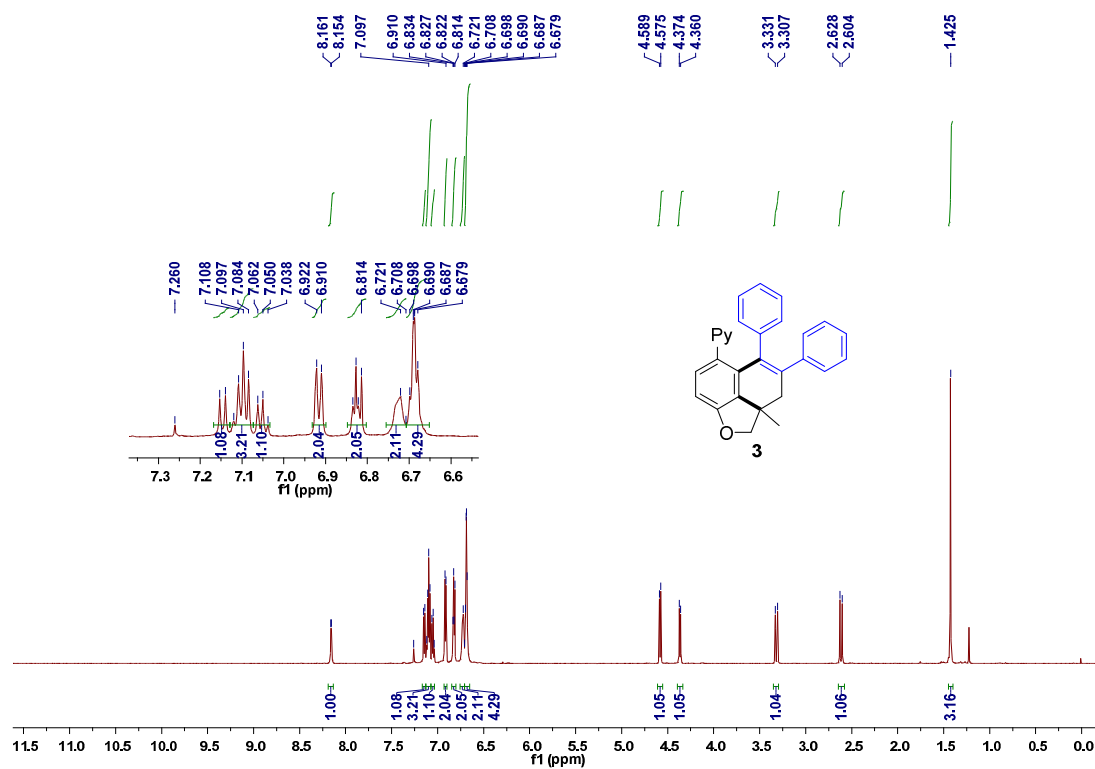

<sup>13</sup>C NMR (150 MHz, CDCl<sub>3</sub>)

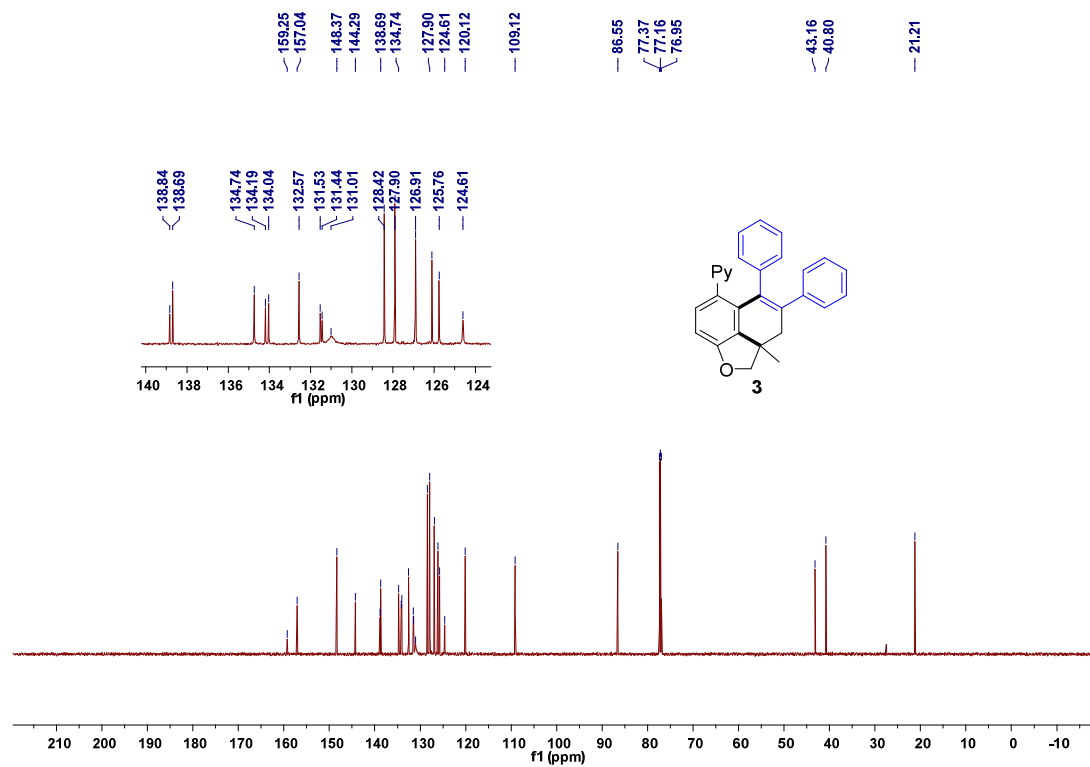

<sup>1</sup>H NMR (600 MHz, CDCl<sub>3</sub>)

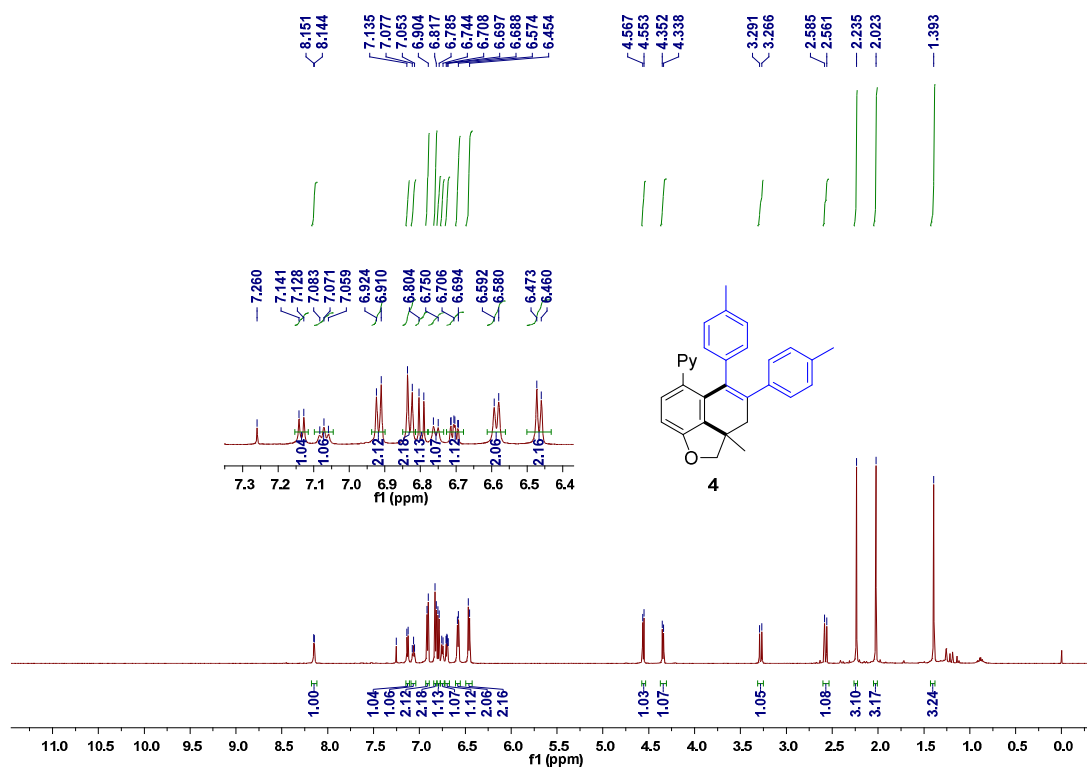

<sup>13</sup>C NMR (150 MHz, CDCl<sub>3</sub>)

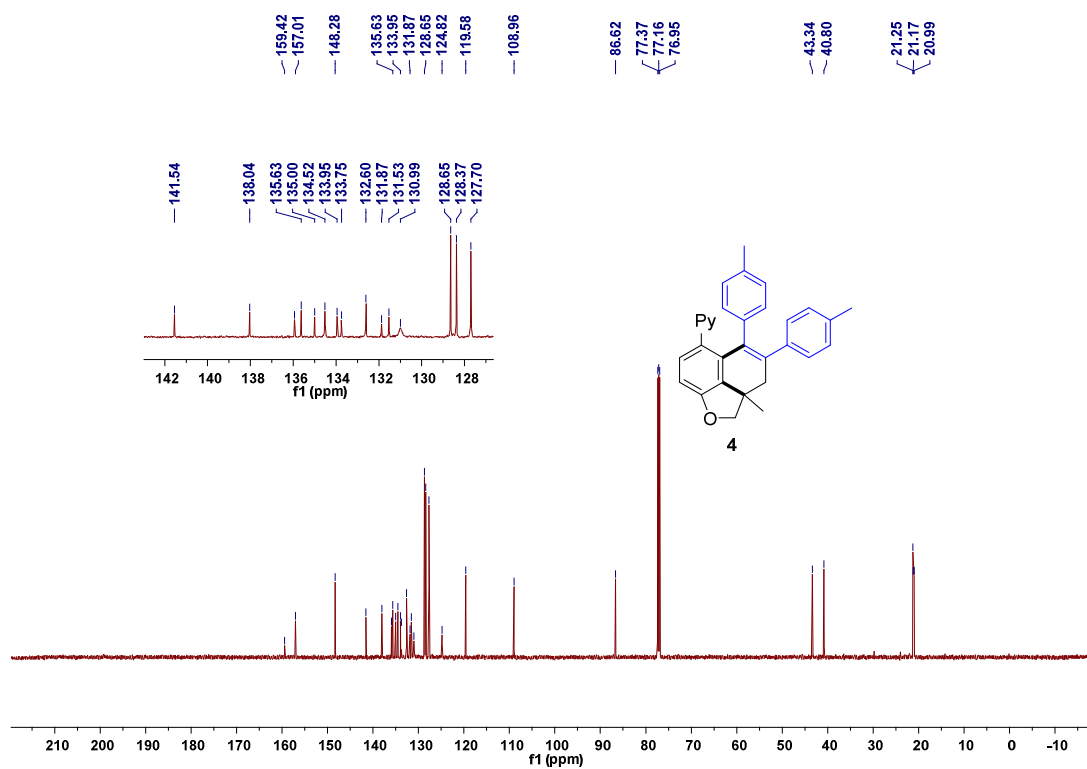

$^1\text{H}$  NMR (600 MHz,  $\text{CDCl}_3$ )

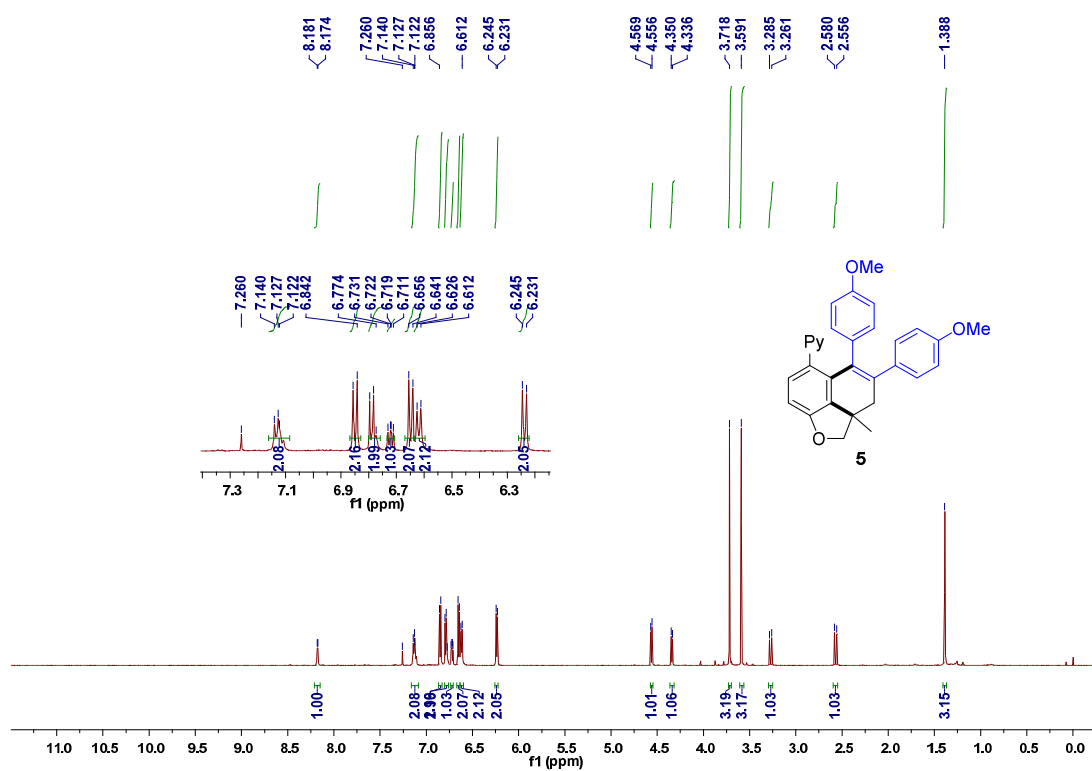

$^{13}\text{C}$  NMR (150 MHz,  $\text{CDCl}_3$ )

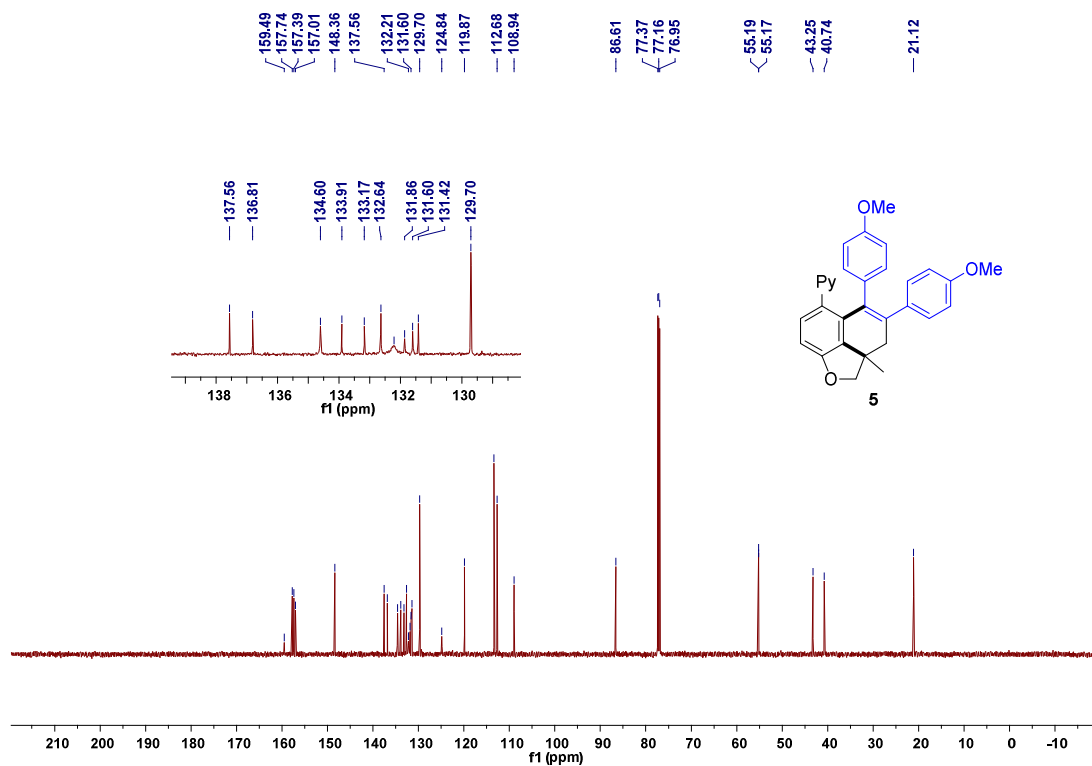

$^1\text{H}$  NMR (600 MHz,  $\text{CDCl}_3$ )

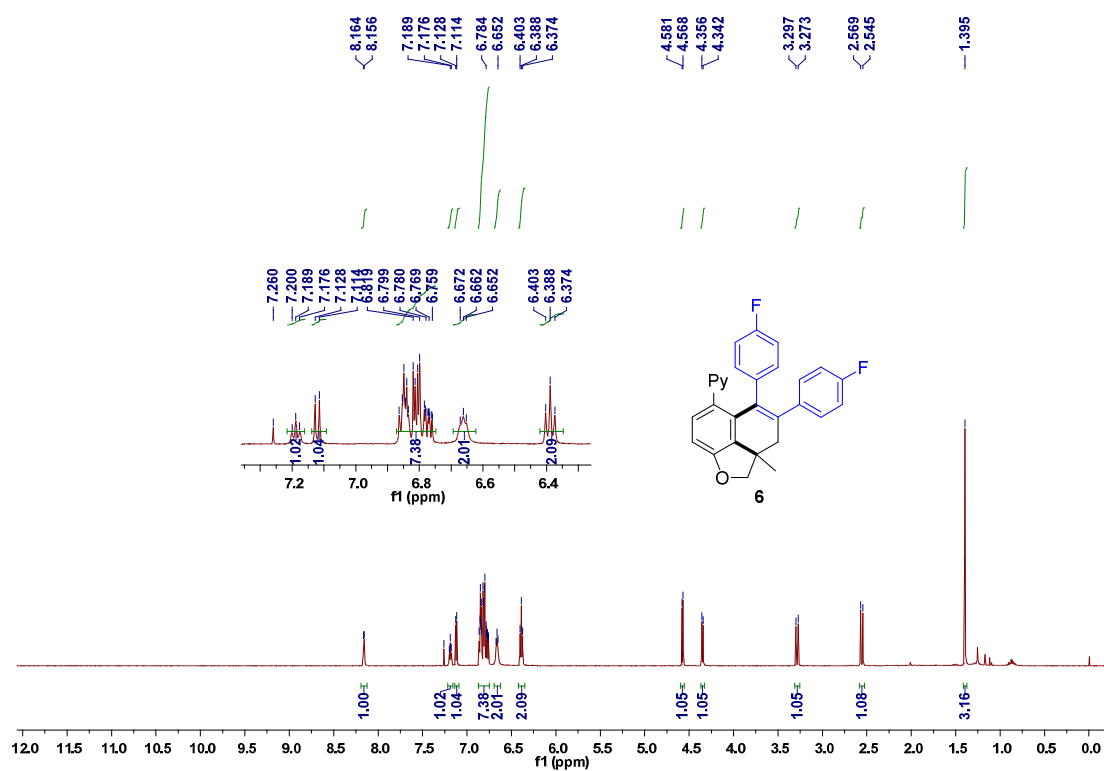

$^{13}\text{C}$  NMR (150 MHz,  $\text{CDCl}_3$ )

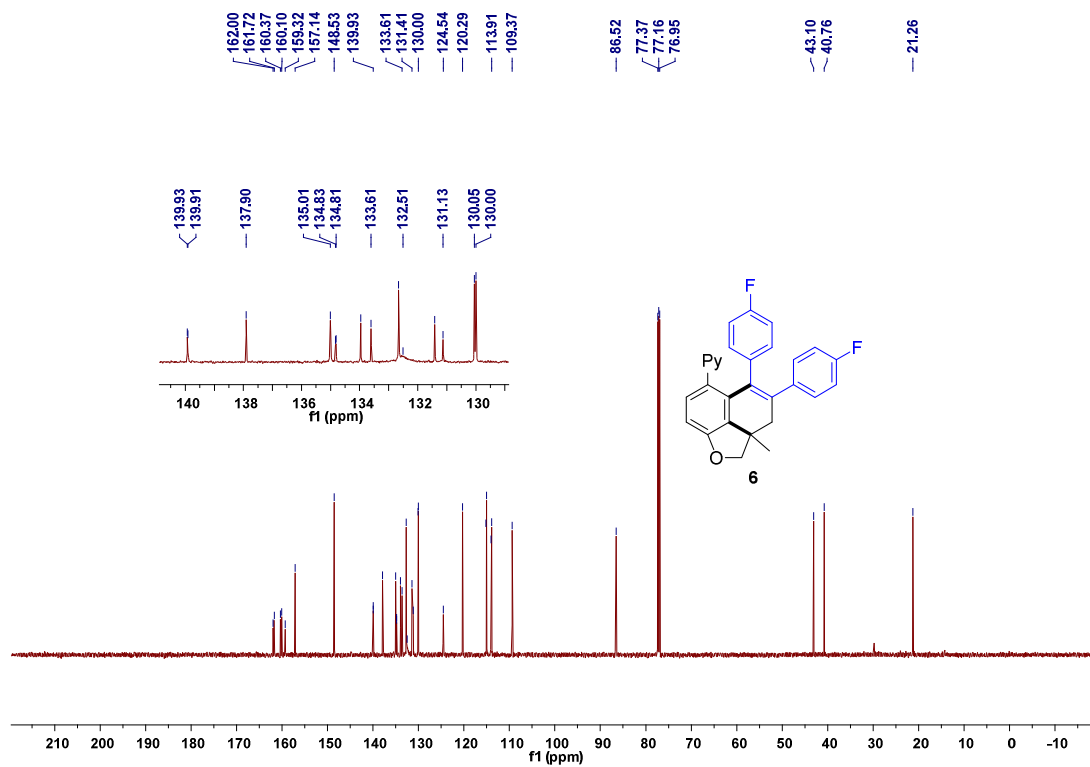

$^{19}\text{F}$  NMR (565 MHz,  $\text{CDCl}_3$ )

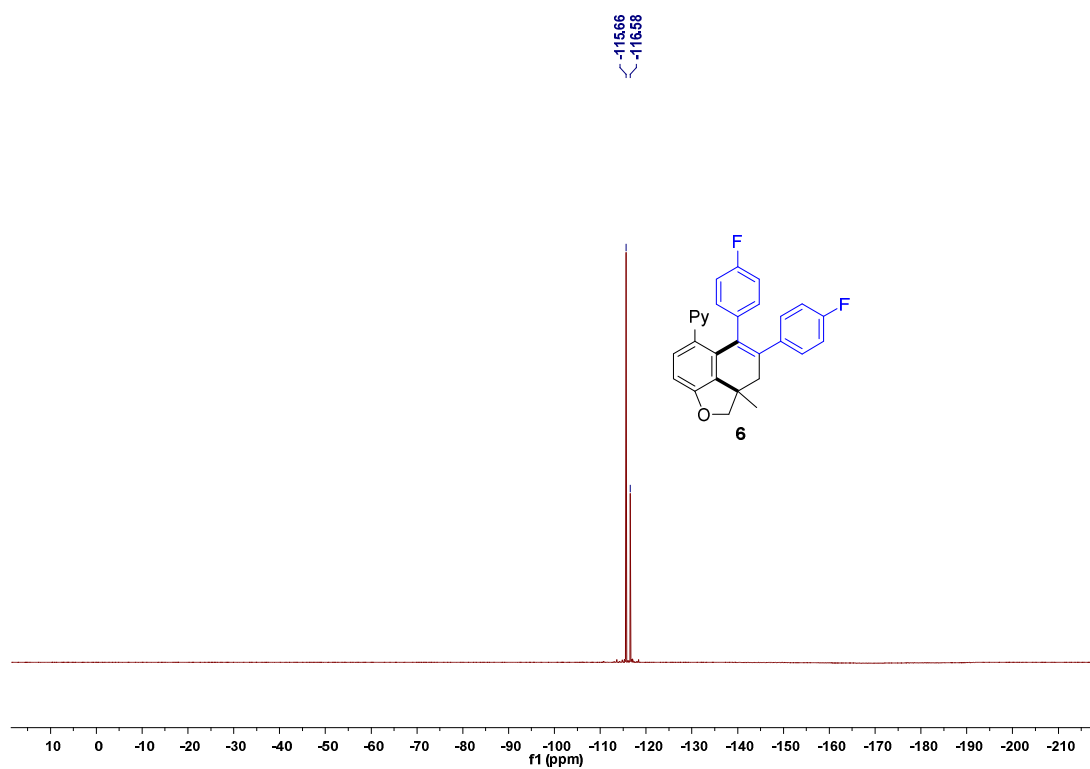

$^1\text{H}$  NMR (600 MHz,  $\text{CDCl}_3$ )

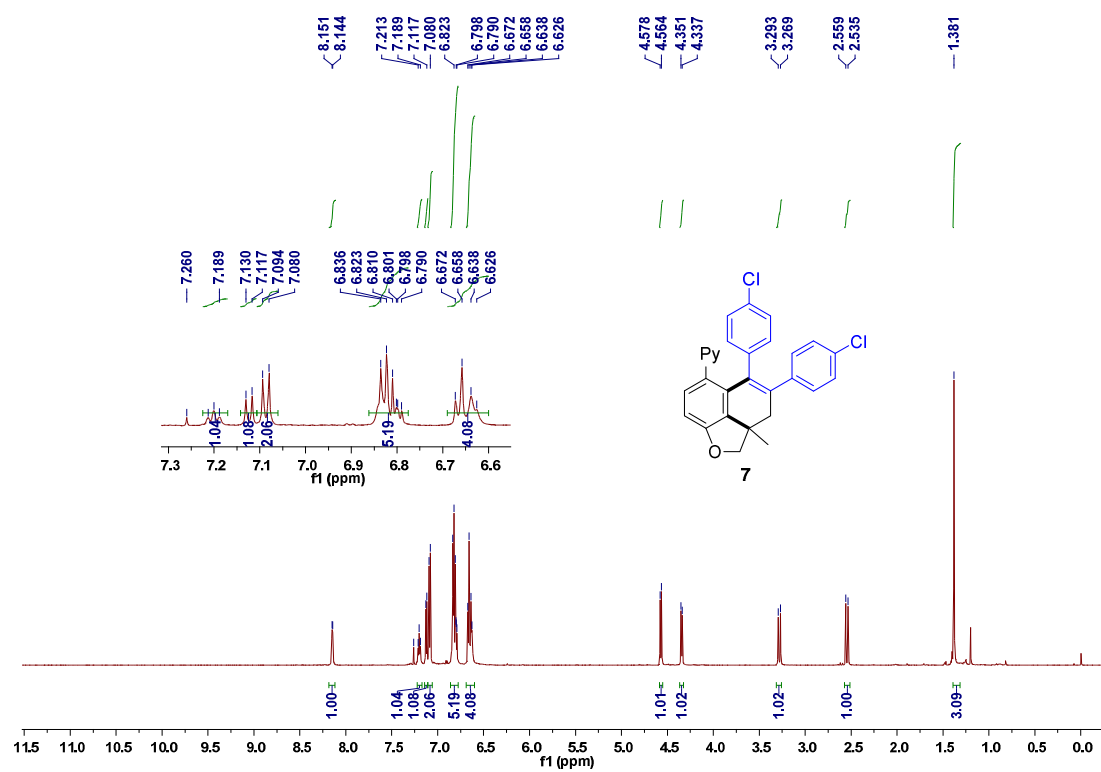



$^{13}\text{C}$  NMR (150 MHz,  $\text{CDCl}_3$ )

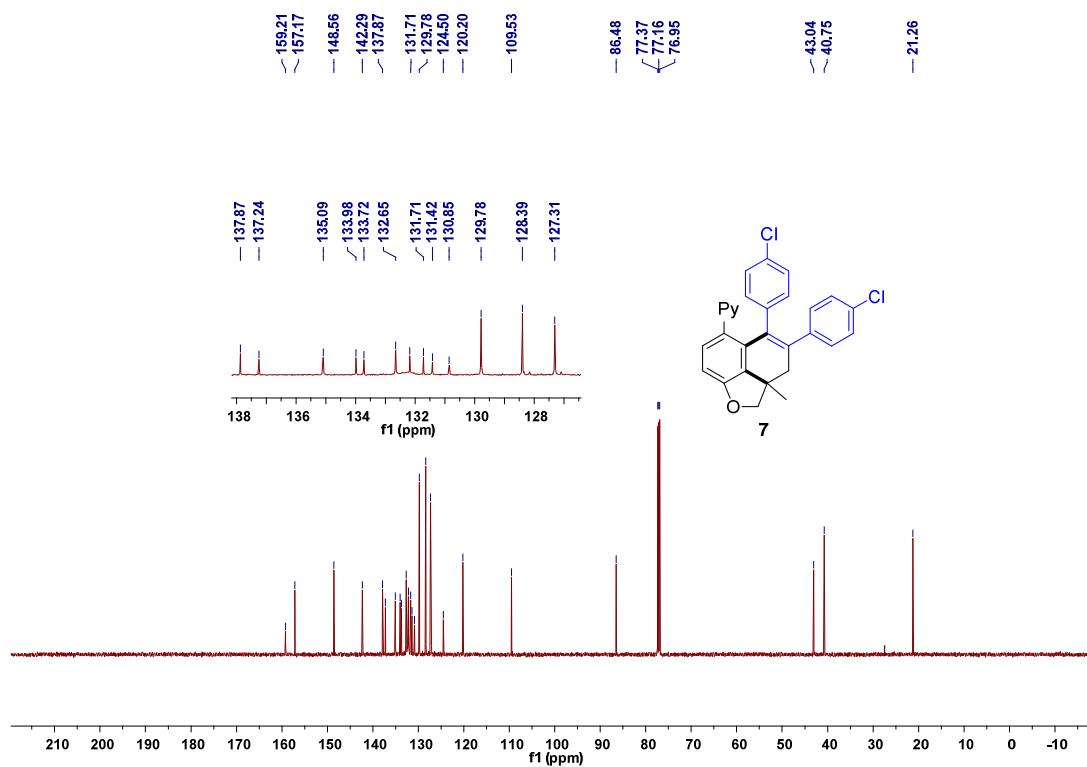

$^1\text{H}$  NMR (600 MHz,  $\text{CDCl}_3$ )

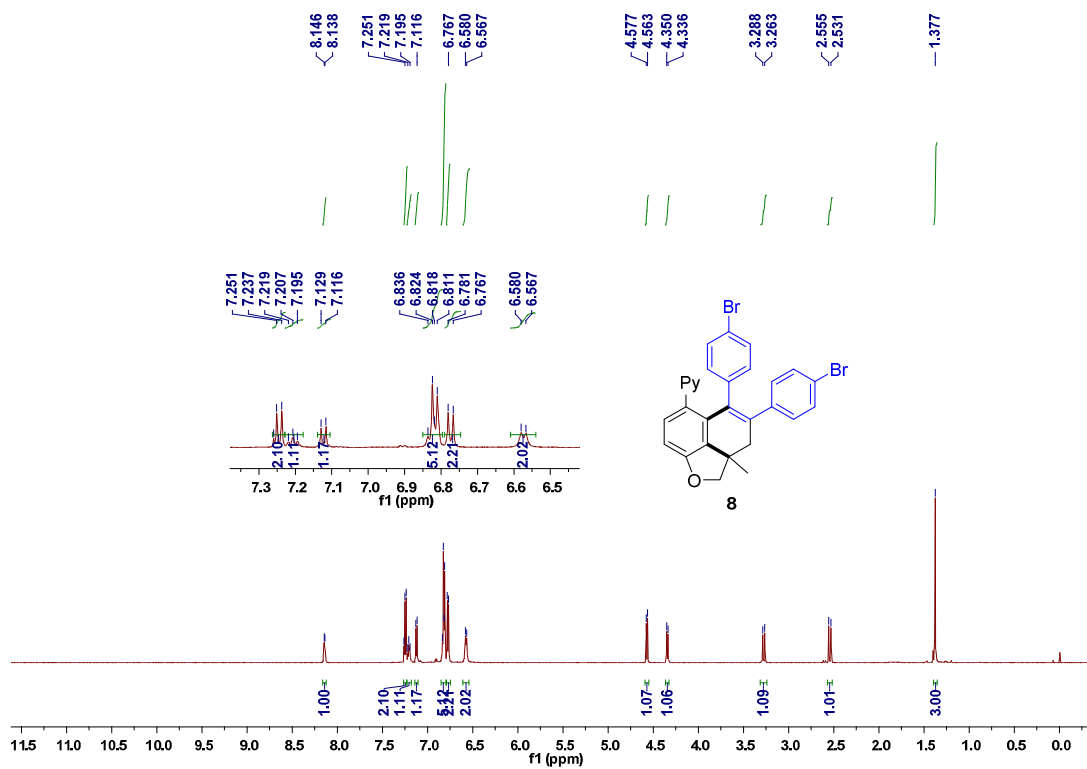

$^{13}\text{C}$  NMR (150 MHz,  $\text{CDCl}_3$ )

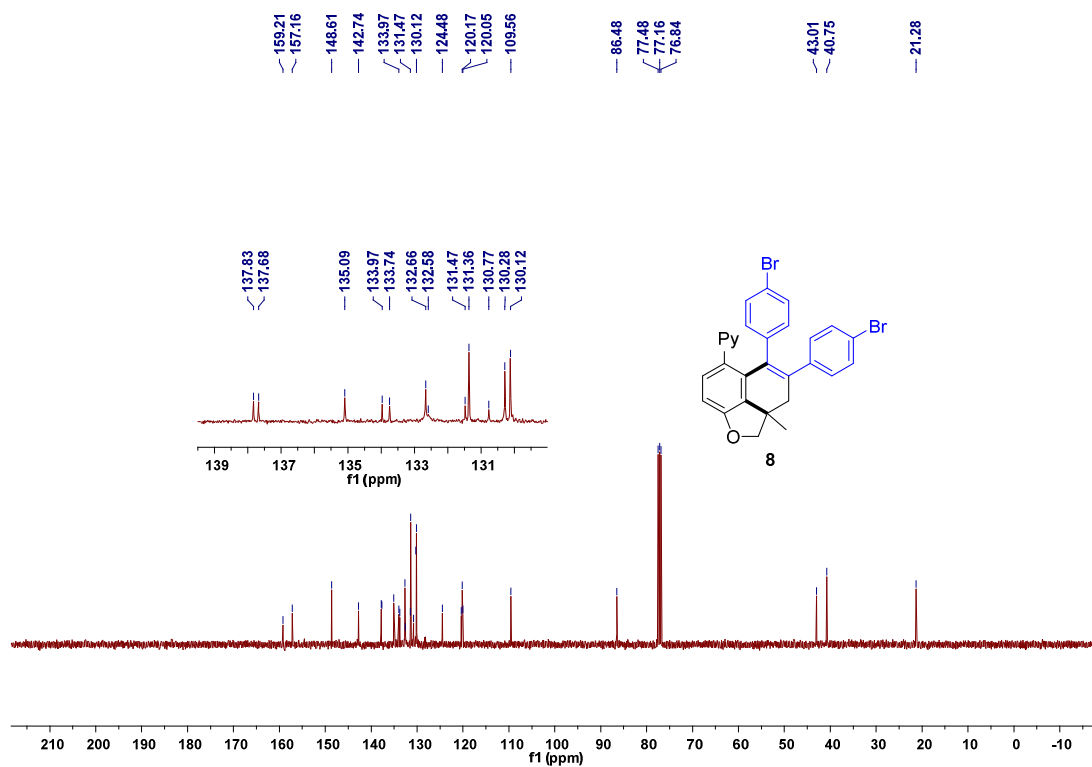

$^1\text{H}$  NMR (400 MHz,  $\text{CDCl}_3$ )

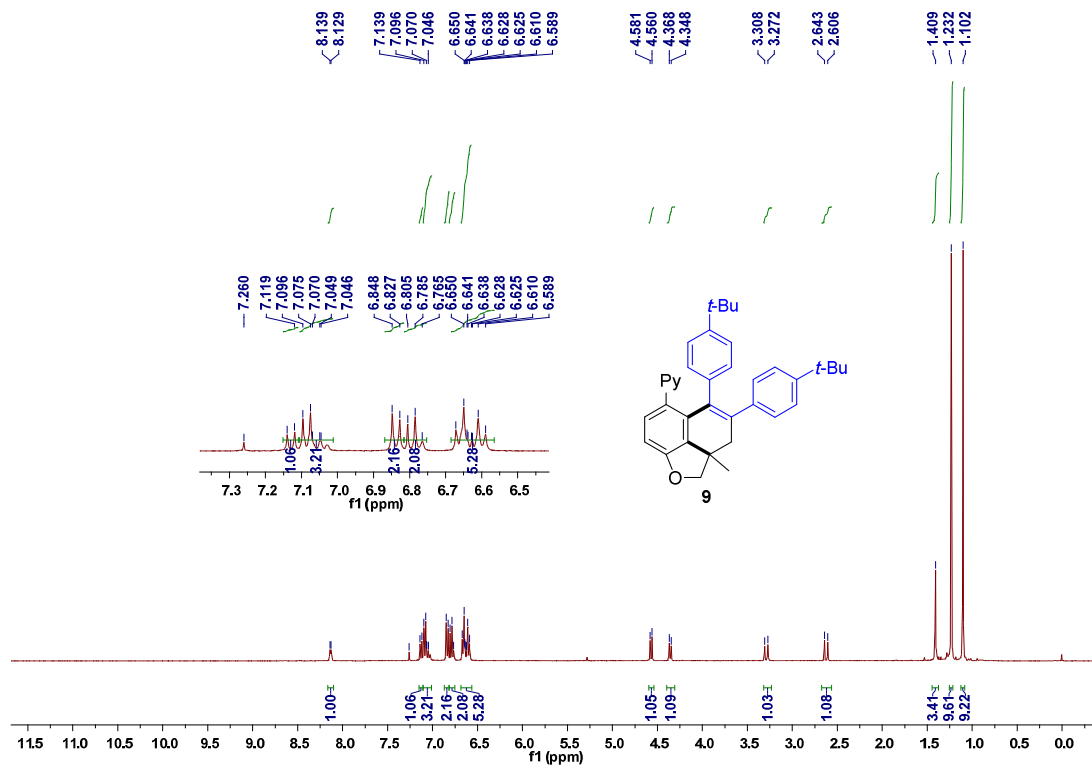

$^{13}\text{C}$  NMR (150 MHz,  $\text{CDCl}_3$ )

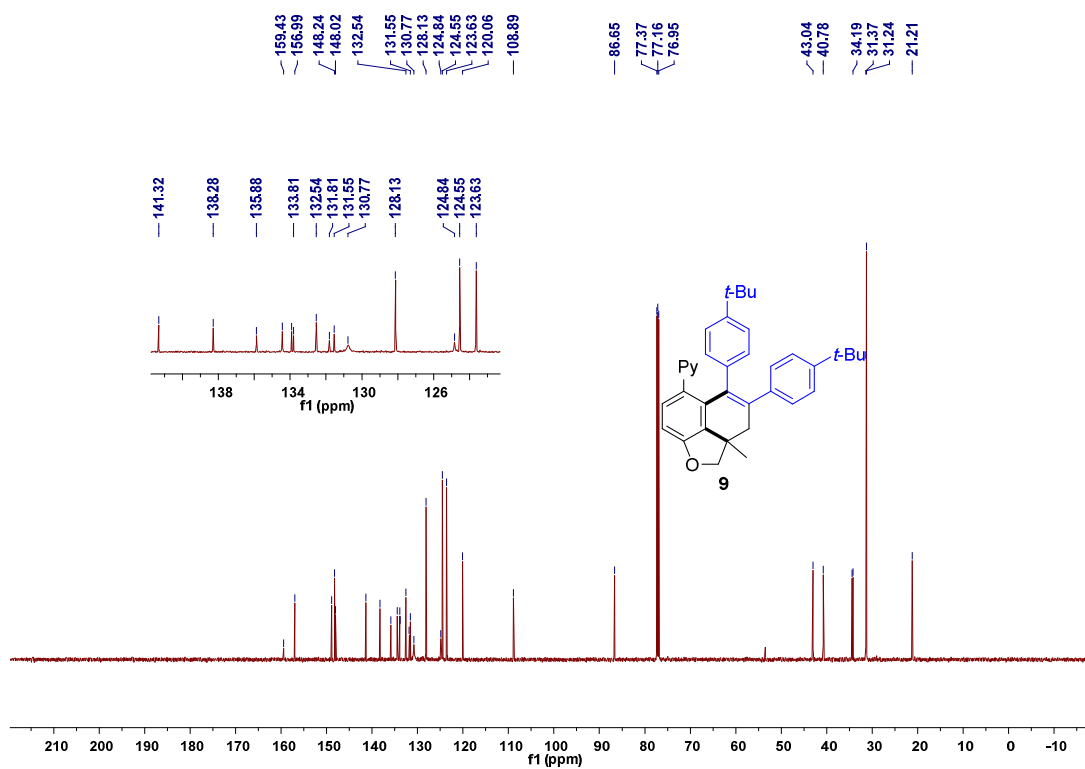

$^1\text{H}$  NMR (600 MHz,  $\text{CDCl}_3$ )

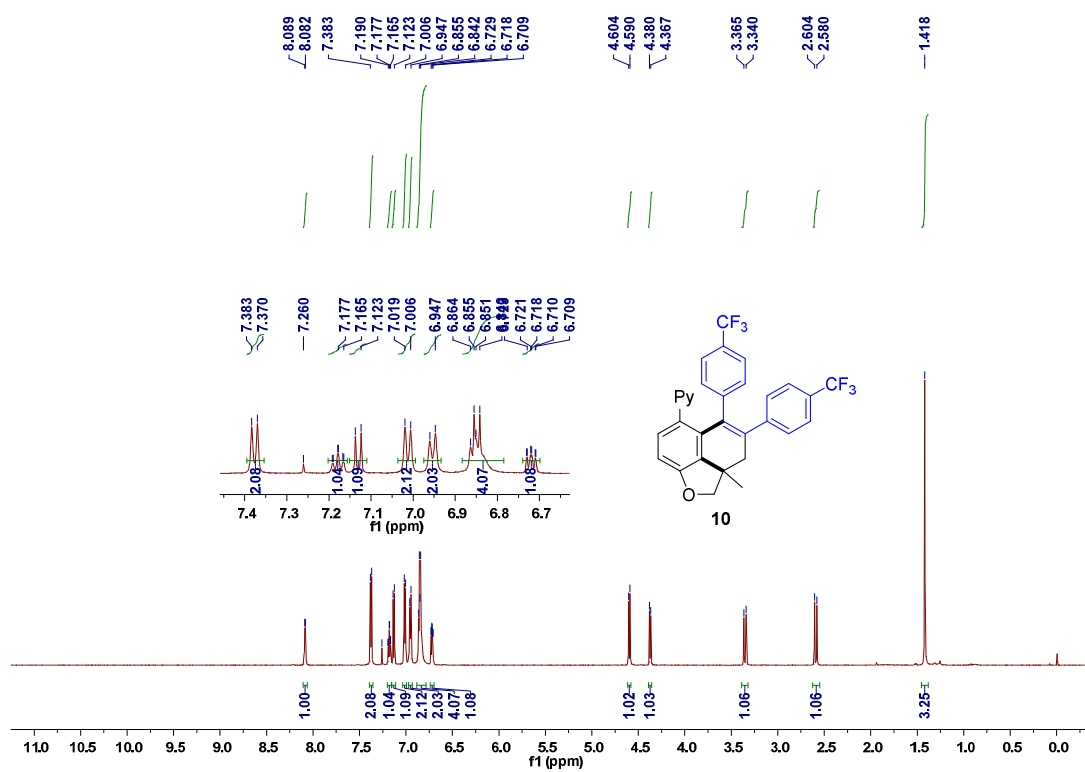

$^{13}\text{C}$  NMR (150 MHz,  $\text{CDCl}_3$ )

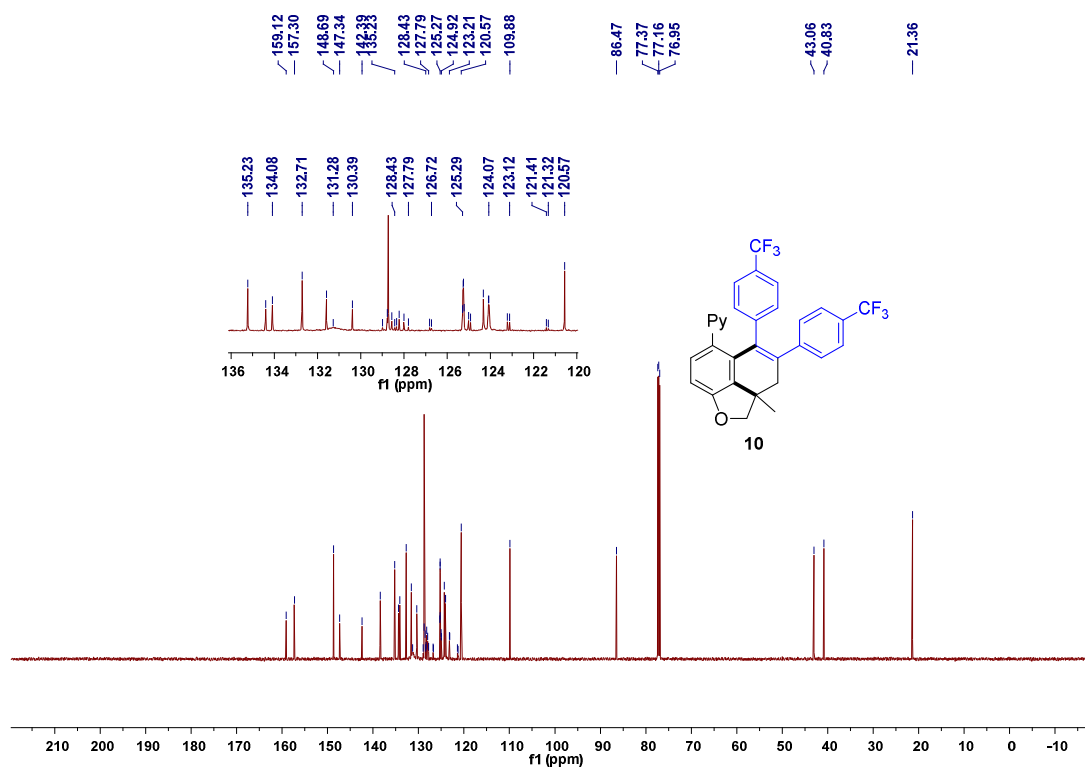

$^{19}\text{F}$  NMR (565 MHz,  $\text{CDCl}_3$ )

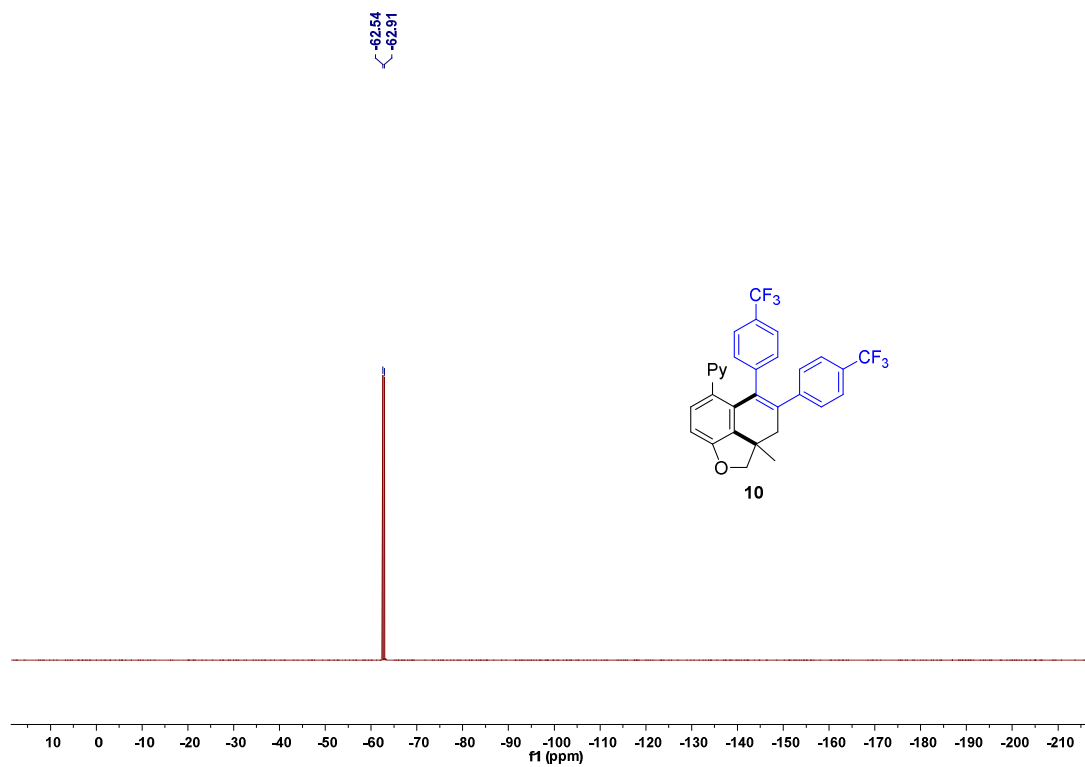

<sup>1</sup>H NMR (600 MHz, CDCl<sub>3</sub>)

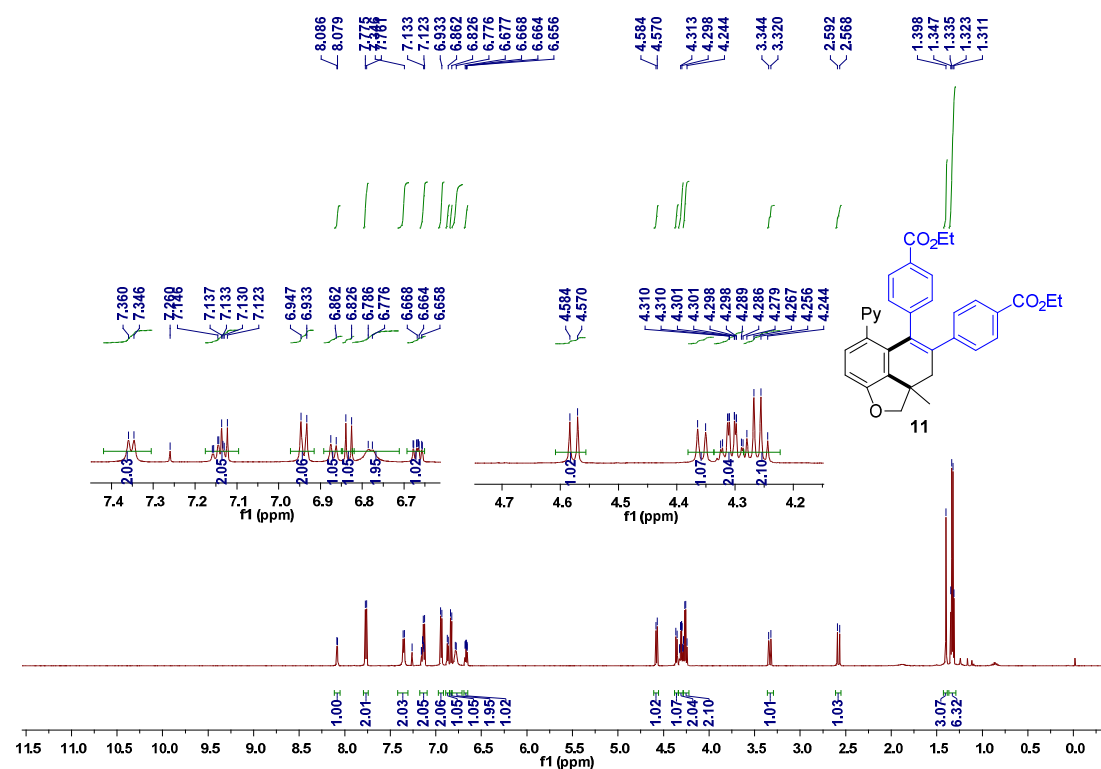

<sup>13</sup>C NMR (150 MHz, CDCl<sub>3</sub>)

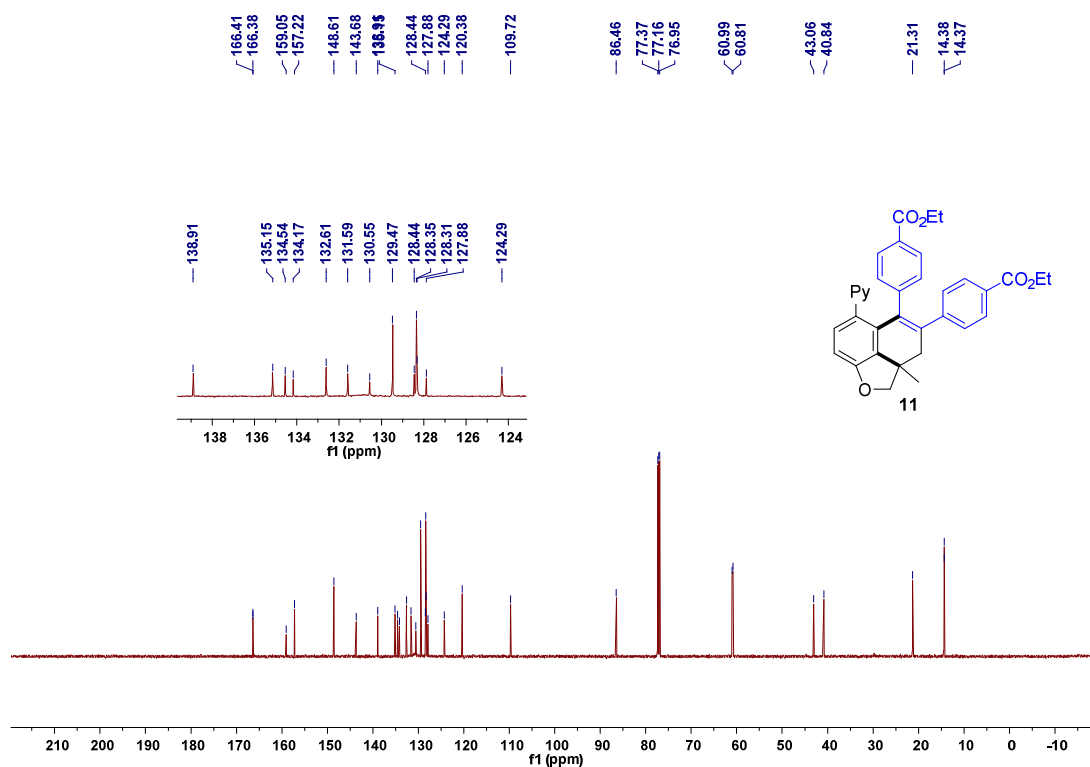

<sup>1</sup>H NMR (600 MHz, CDCl<sub>3</sub>)

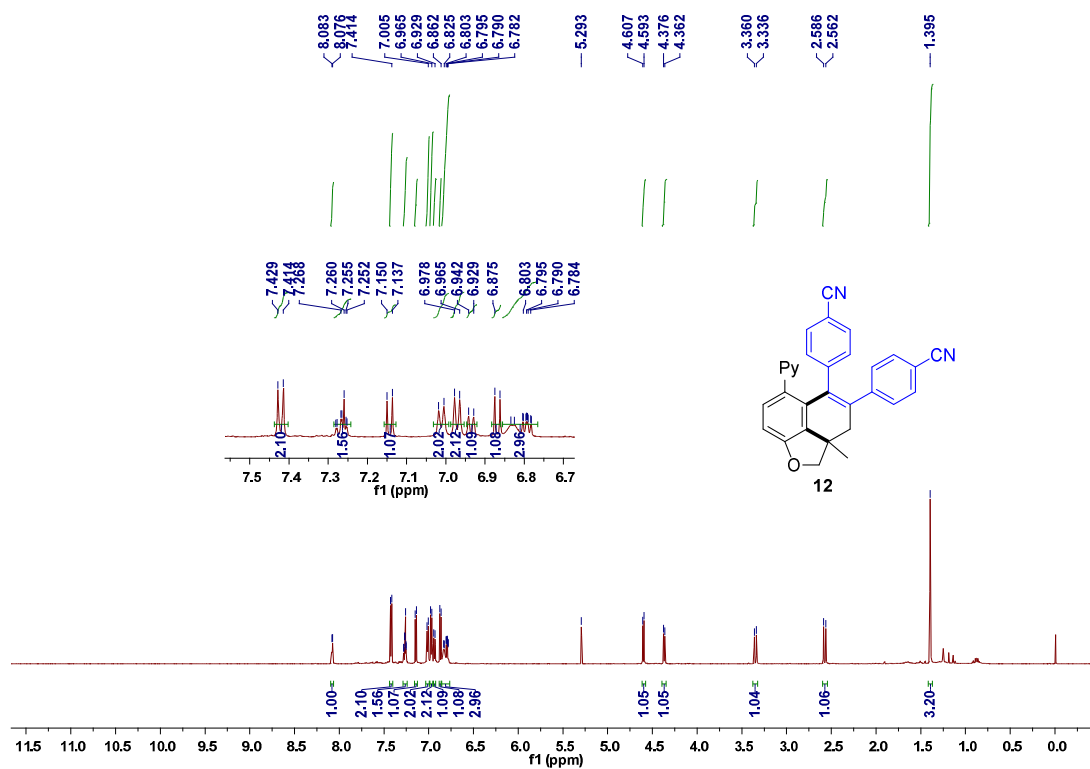

<sup>13</sup>C NMR (150 MHz, CDCl<sub>3</sub>)

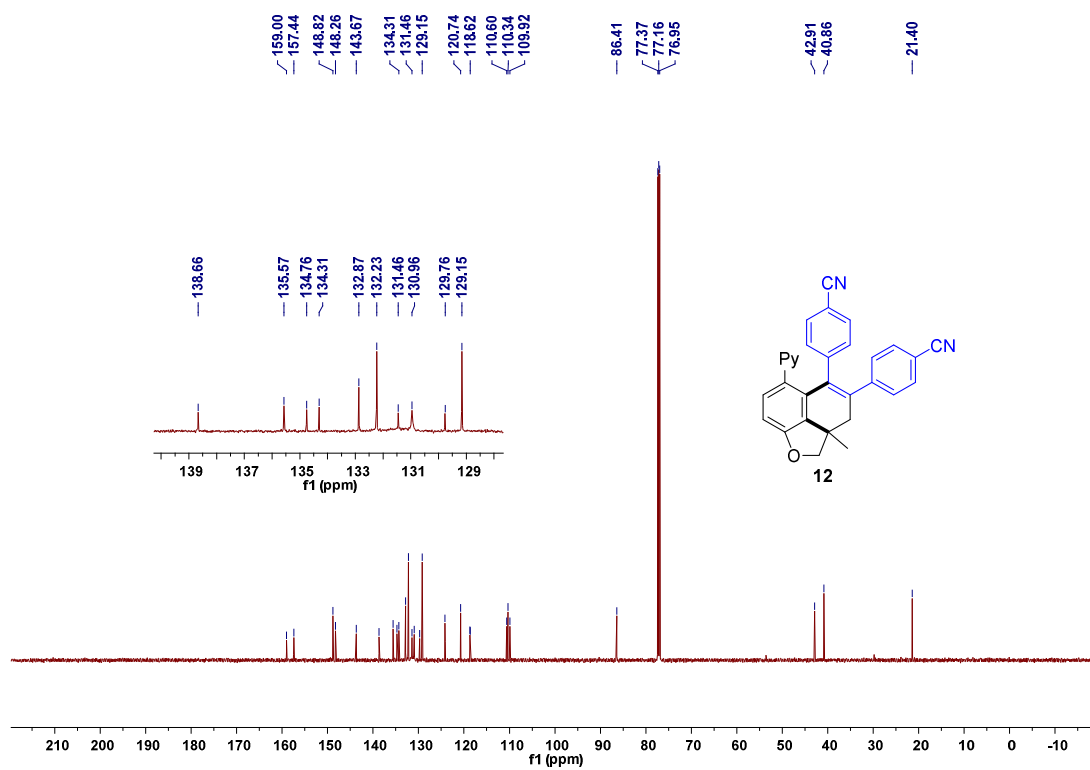

$^1\text{H}$  NMR (600 MHz,  $\text{DMSO}-d_6$ )

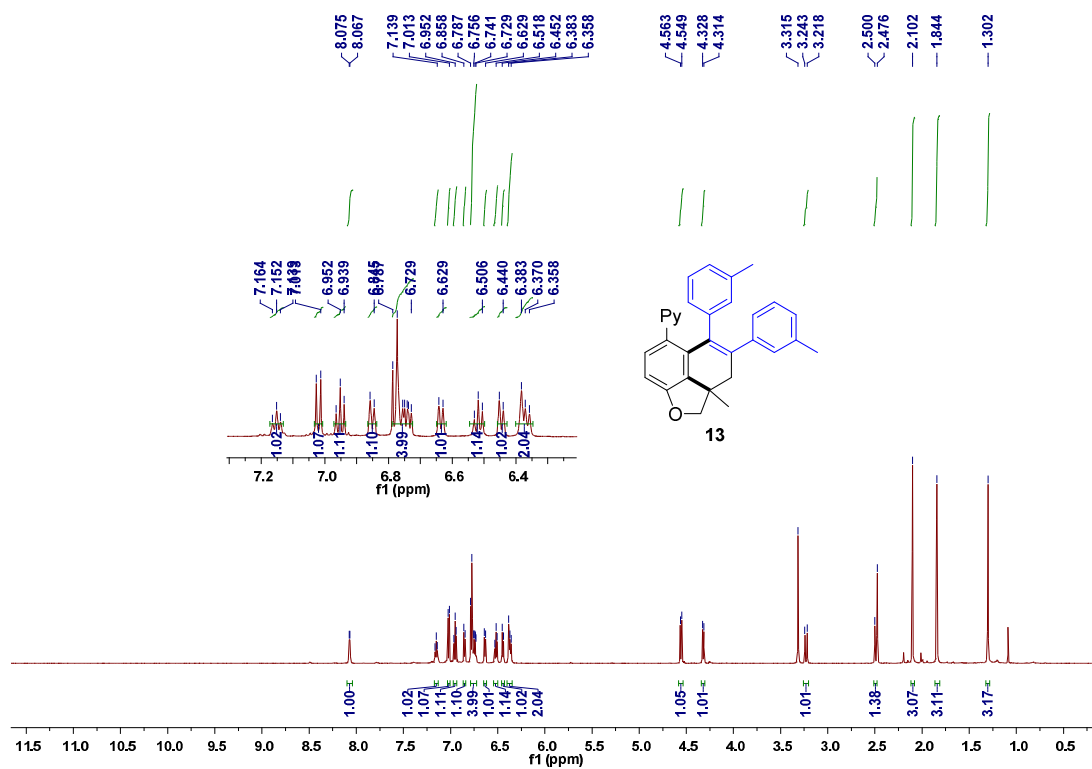

$^{13}\text{C}$  NMR (150 MHz,  $\text{DMSO}-d_6$ )

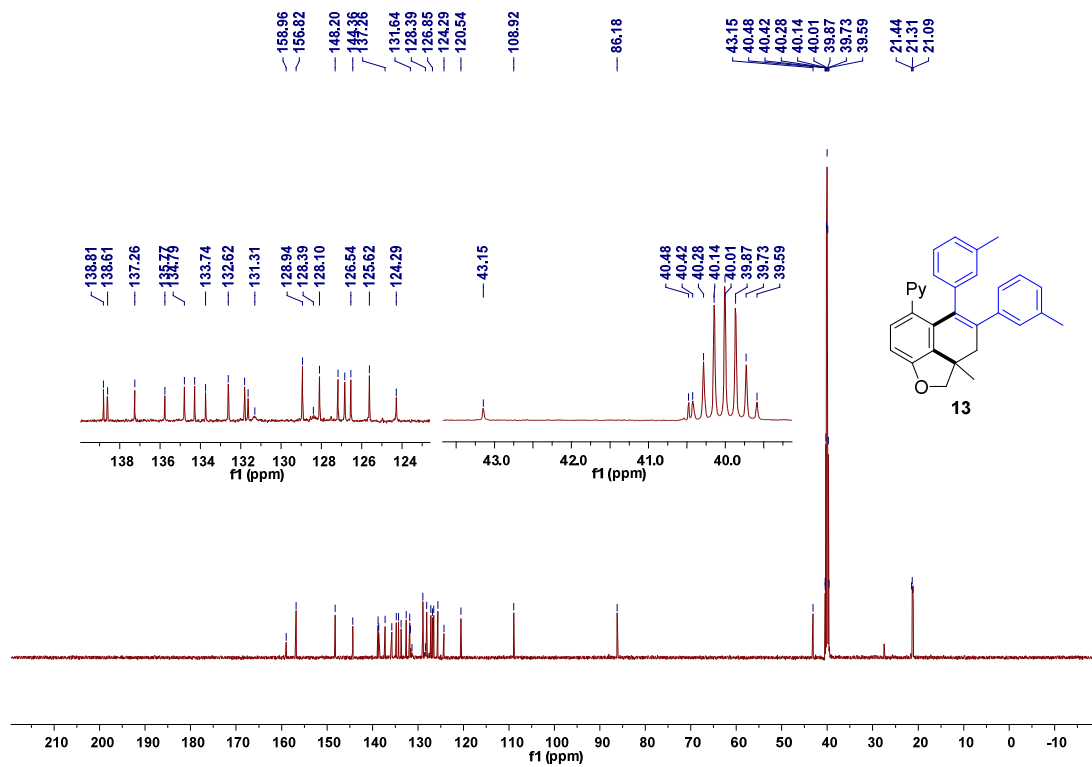

$^1\text{H}$  NMR (600 MHz,  $\text{CDCl}_3$ )

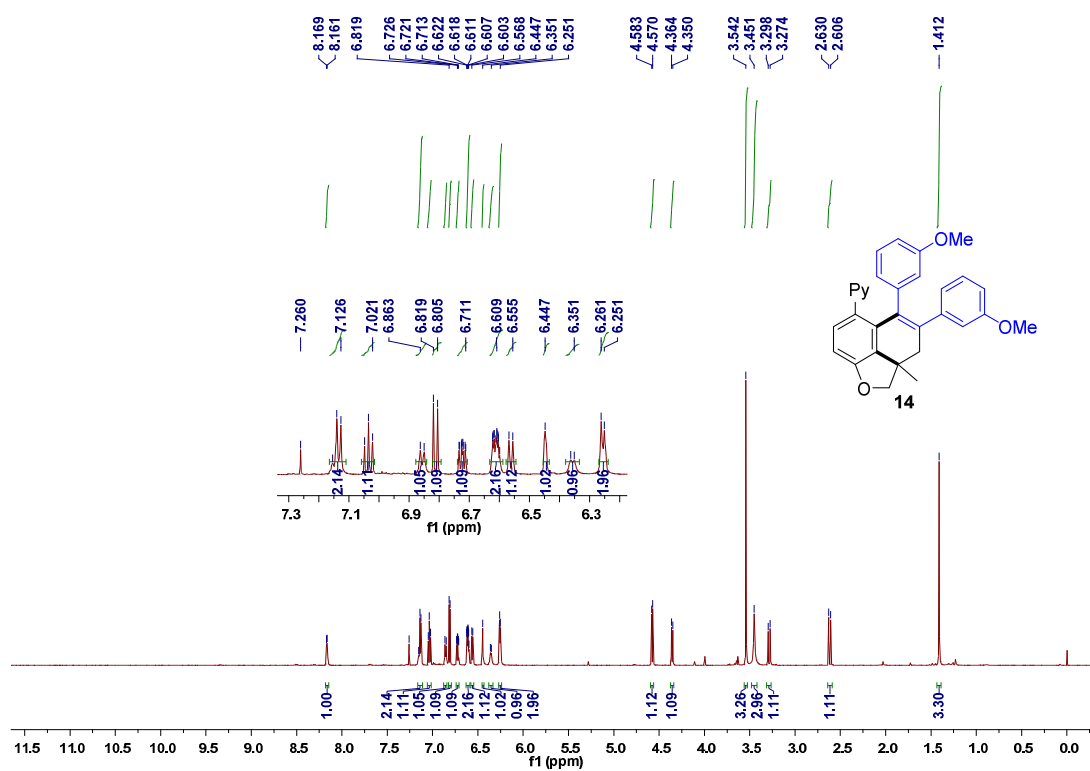

$^{13}\text{C}$  NMR (150 MHz,  $\text{CDCl}_3$ )

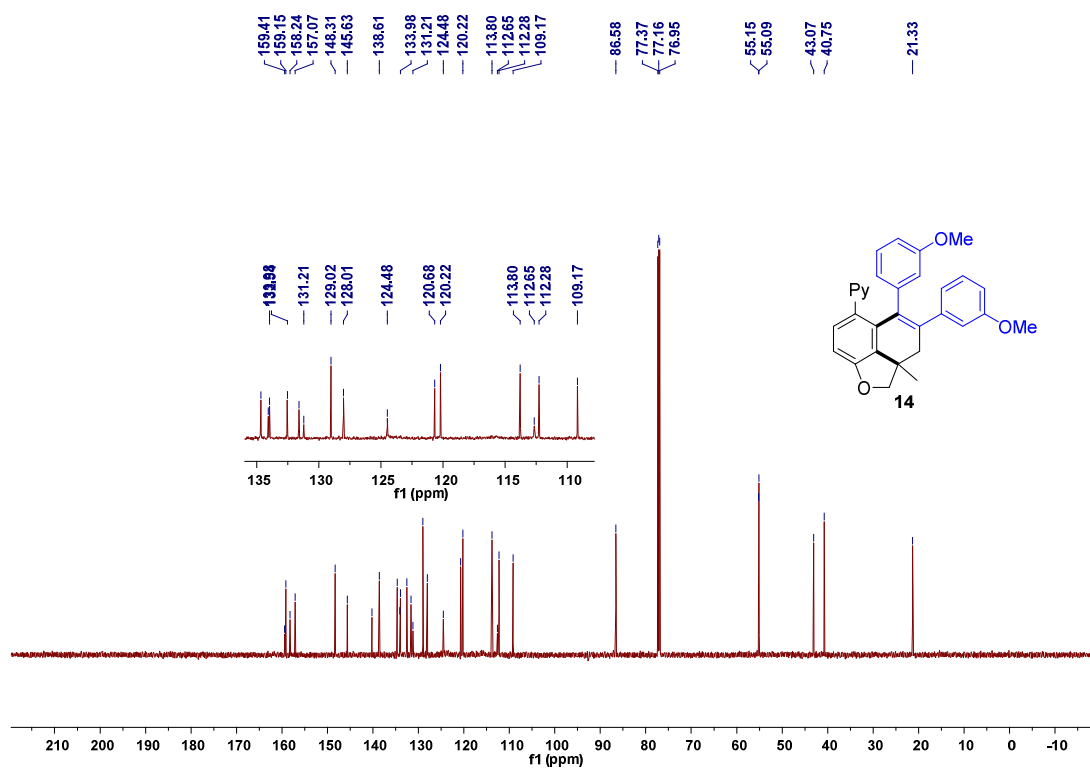



$^1\text{H}$  NMR (600 MHz,  $\text{CDCl}_3$ )

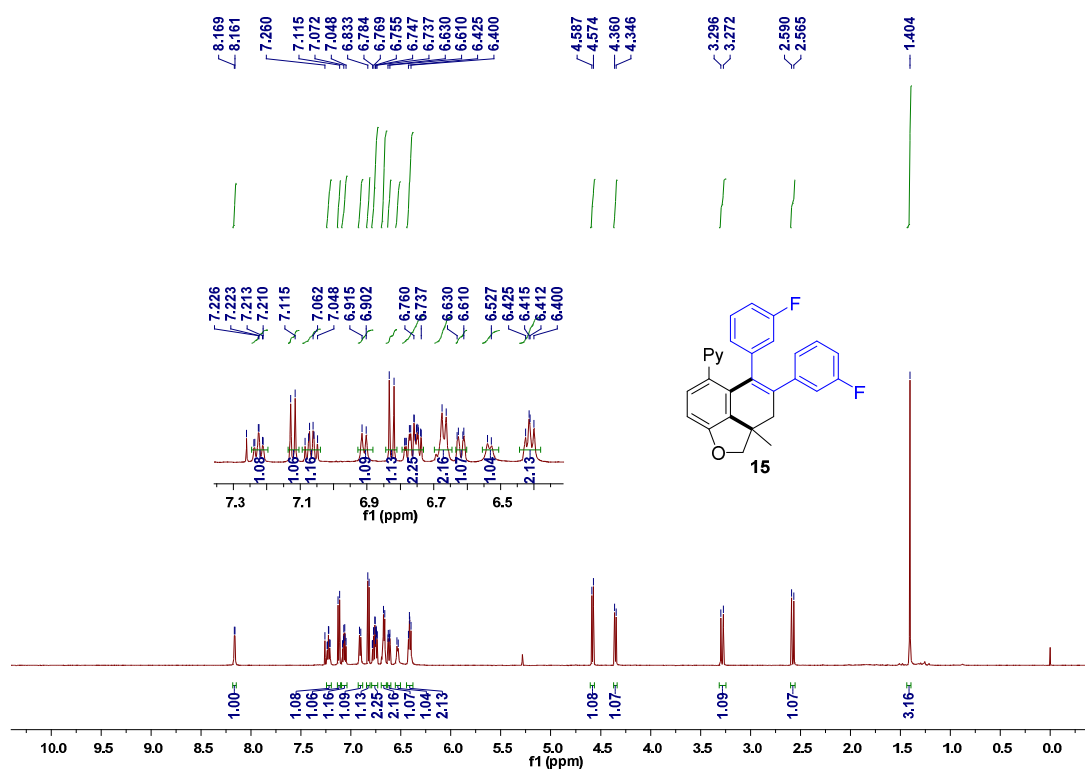

$^{13}\text{C}$  NMR (150 MHz,  $\text{CDCl}_3$ )

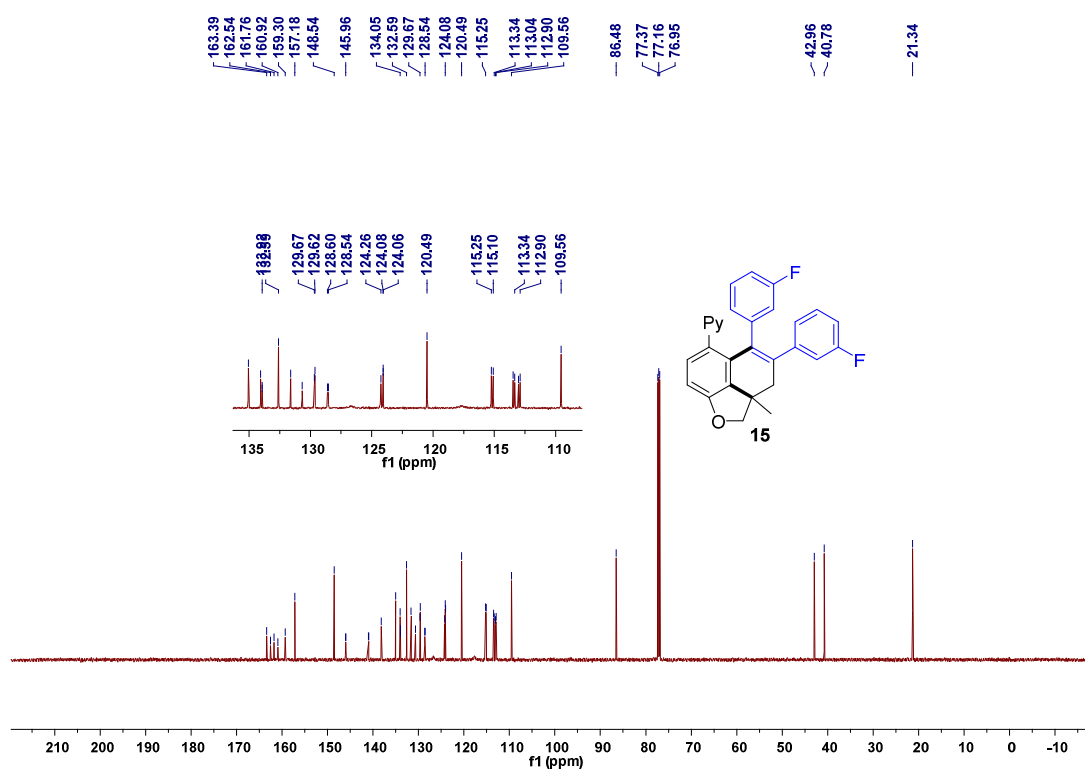

$^{19}\text{F}$  NMR (565 MHz,  $\text{CDCl}_3$ )

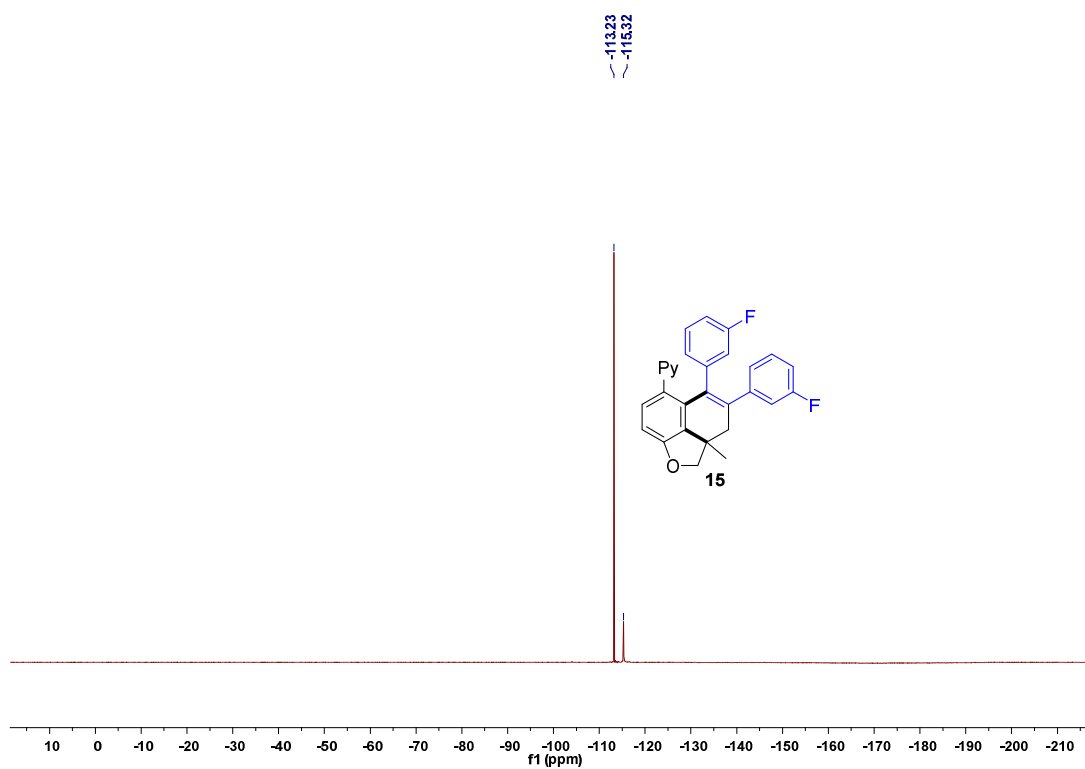

$^1\text{H}$  NMR (600 MHz,  $\text{CDCl}_3$ )

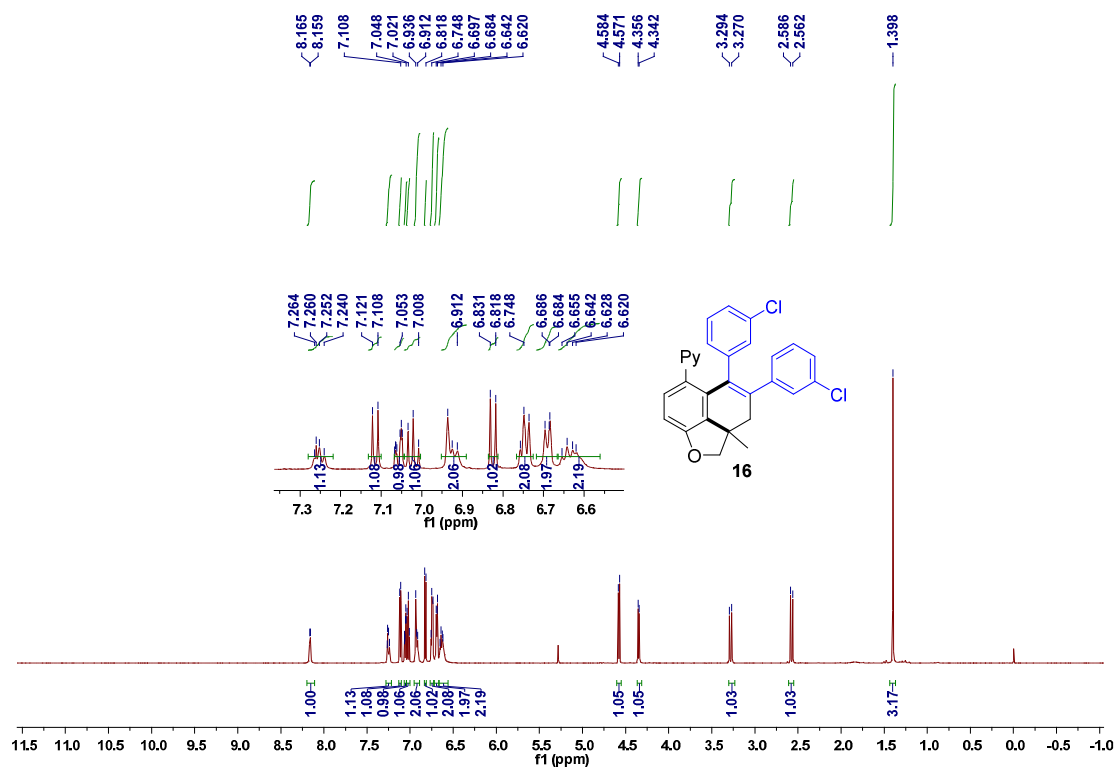

$^{13}\text{C}$  NMR (150 MHz,  $\text{CDCl}_3$ )

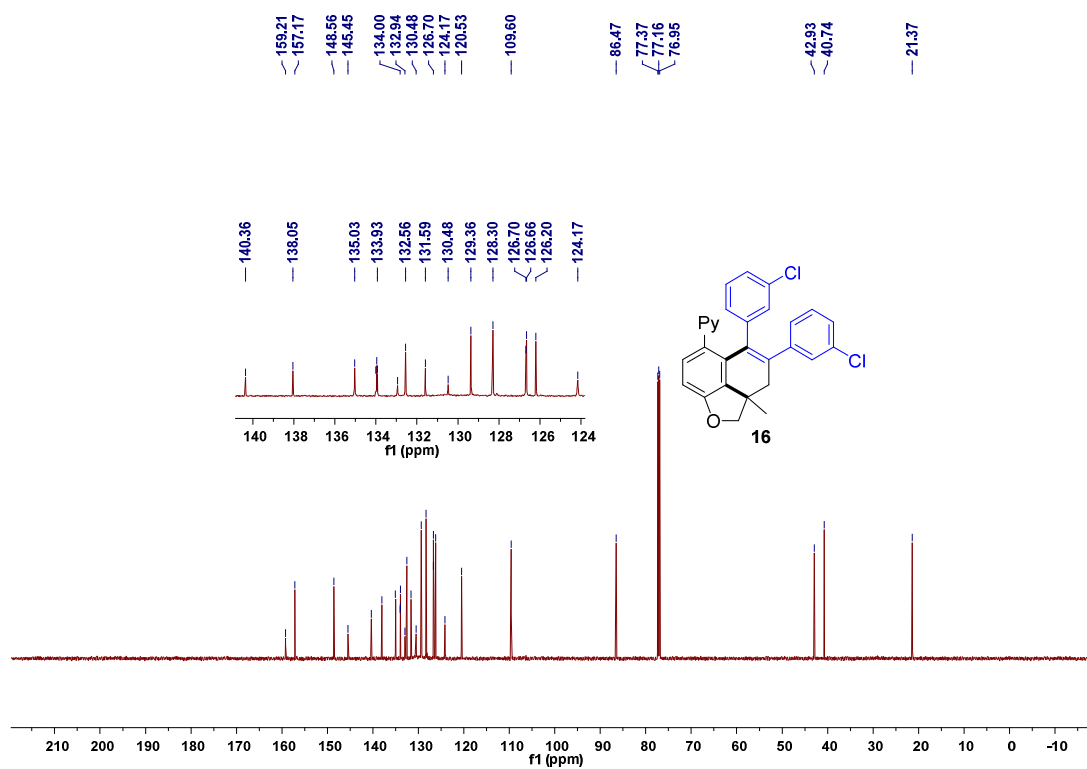

$^1\text{H}$  NMR (600 MHz,  $\text{CDCl}_3$ )

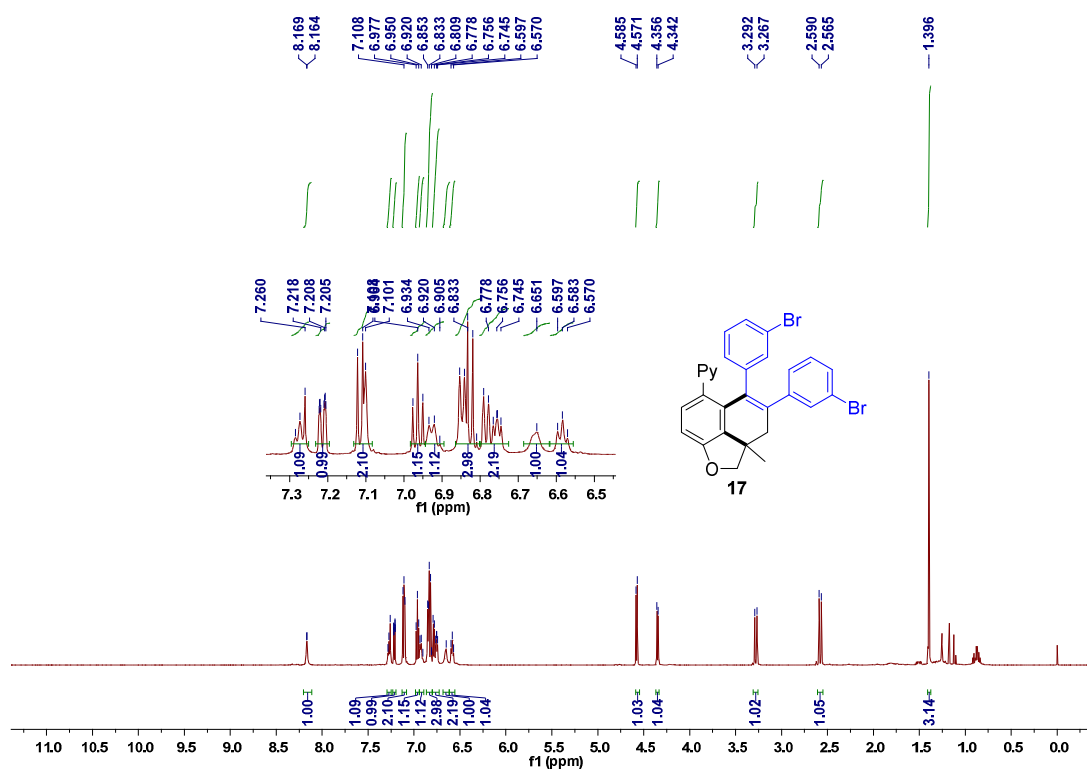

$^{13}\text{C}$  NMR (150 MHz,  $\text{CDCl}_3$ )

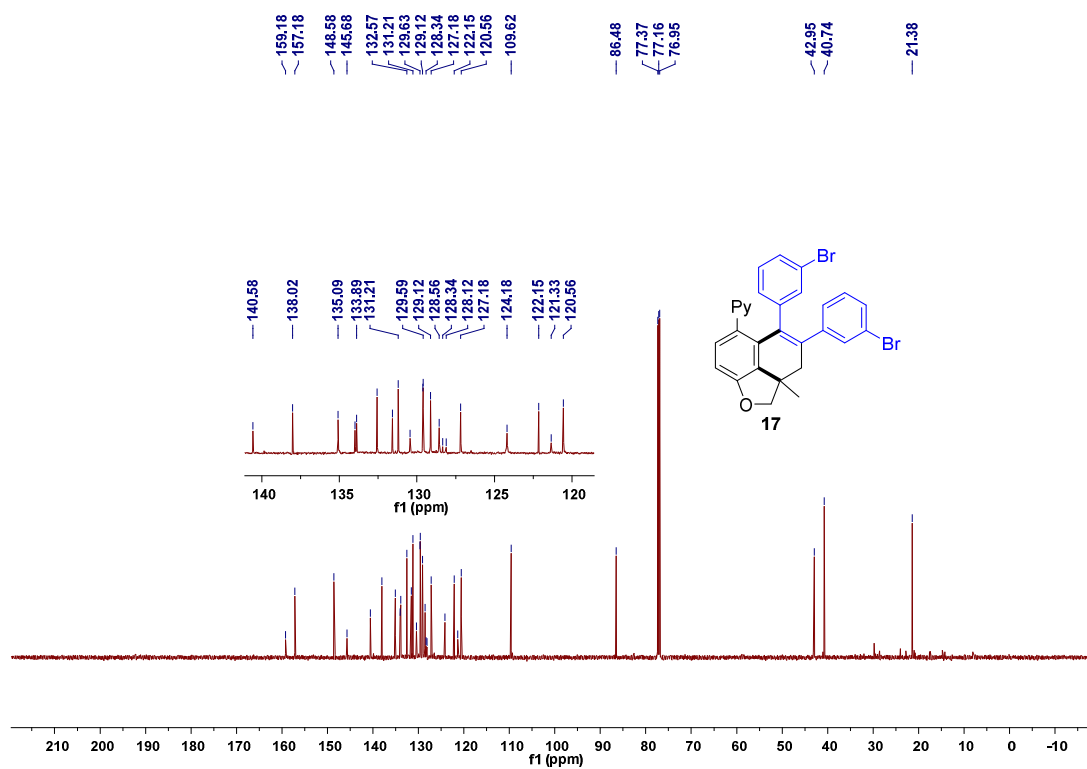

$^1\text{H}$  NMR (600 MHz,  $\text{CDCl}_3$ )

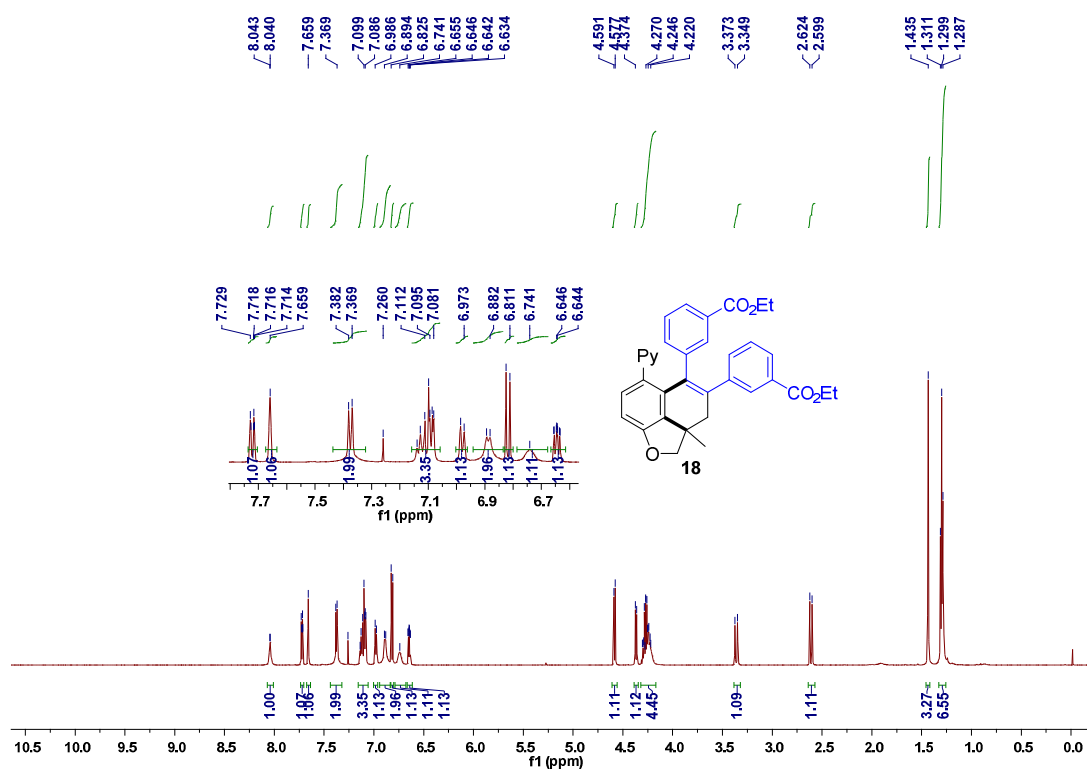

$^{13}\text{C}$  NMR (150 MHz,  $\text{CDCl}_3$ )

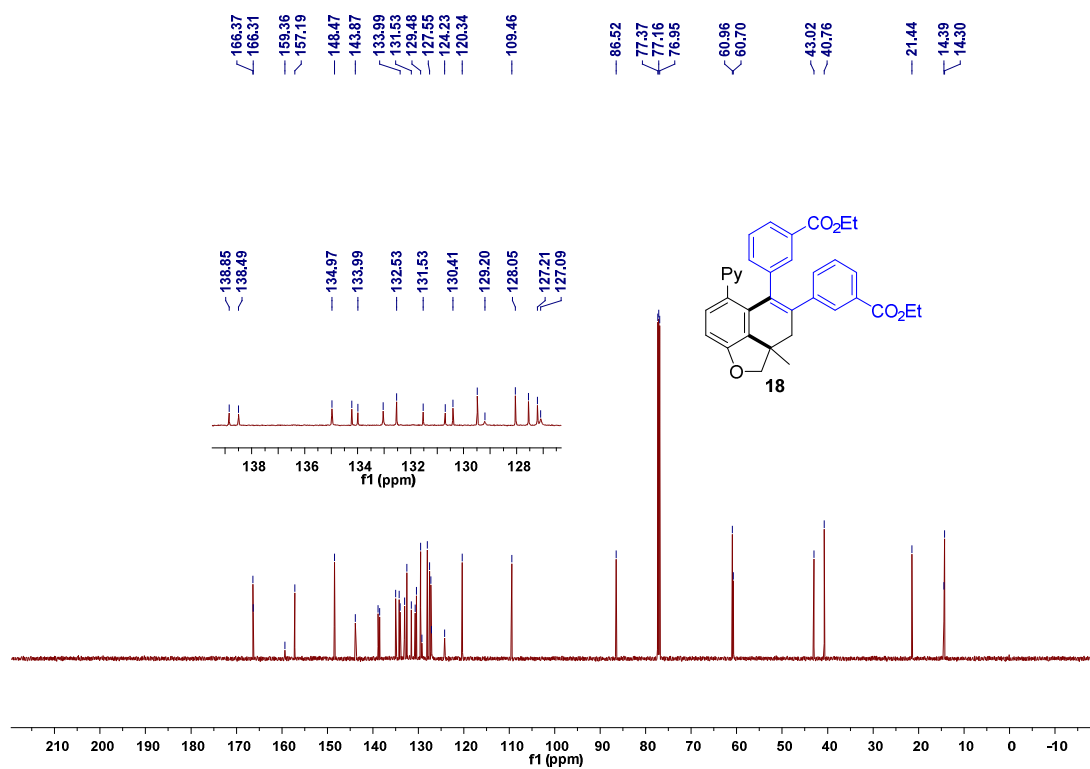

$^1\text{H}$  NMR (400 MHz,  $\text{CDCl}_3$ )

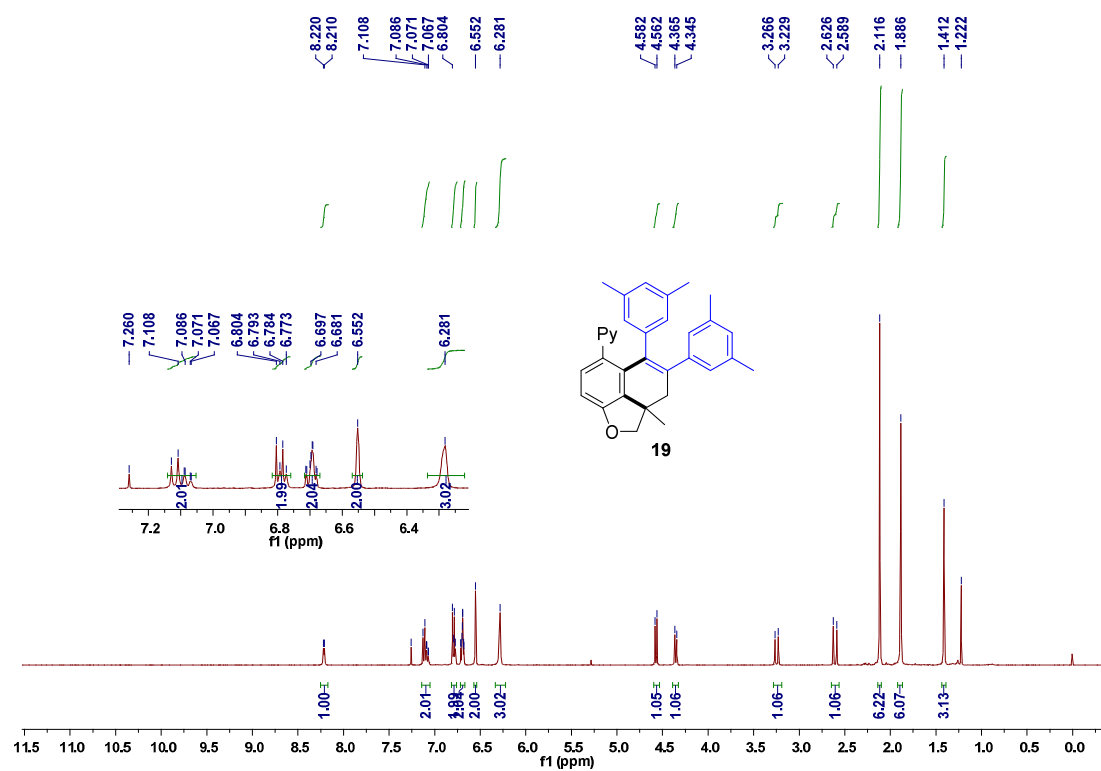

$^{13}\text{C}$  NMR (150 MHz,  $\text{CDCl}_3$ )

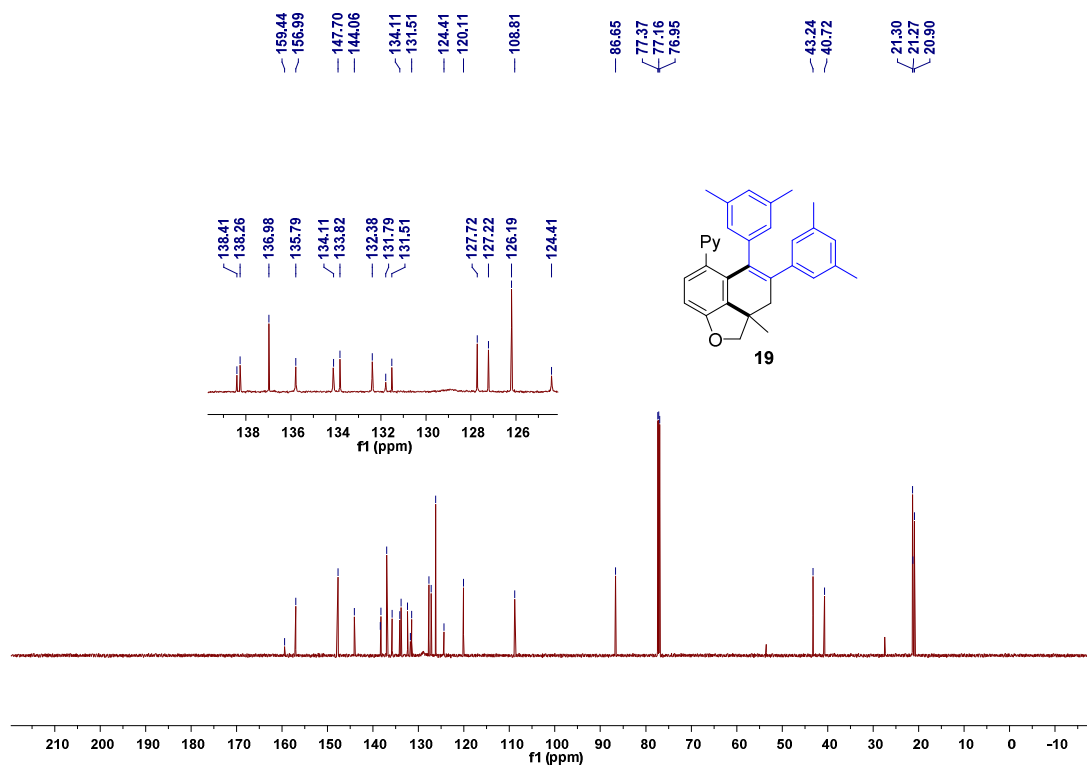

$^1\text{H}$  NMR (600 MHz,  $\text{CDCl}_3$ )

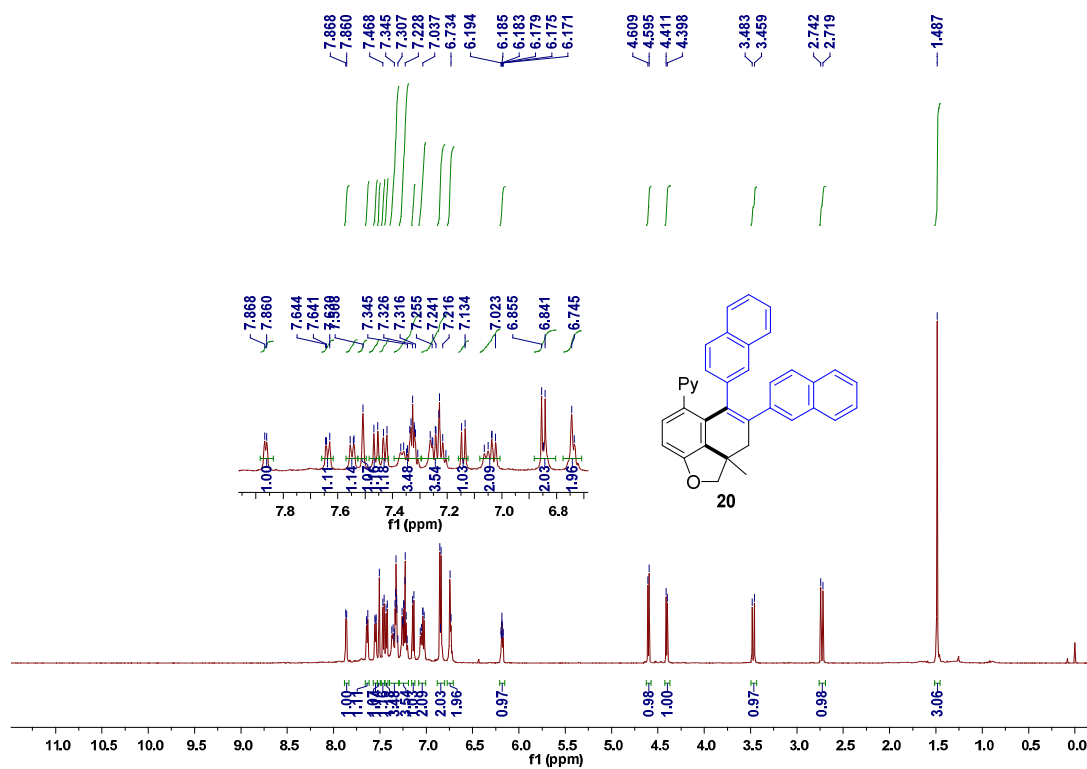

$^{13}\text{C}$  NMR (150 MHz,  $\text{CDCl}_3$ )

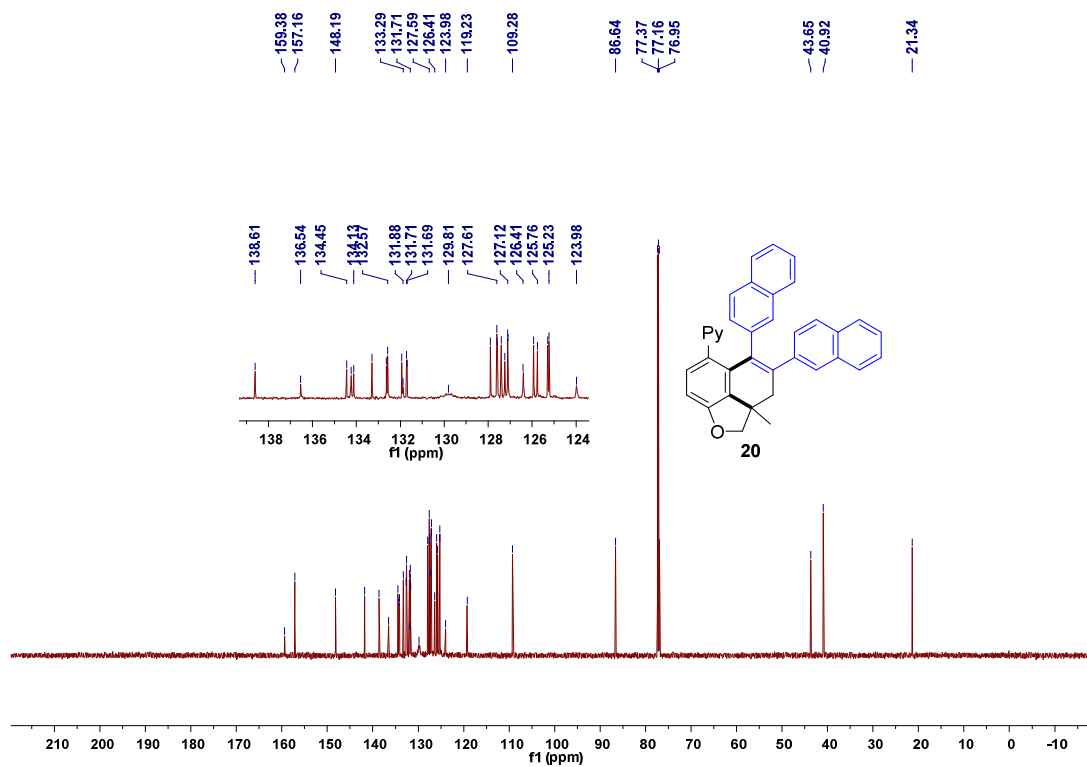

$^1\text{H}$  NMR (600 MHz,  $\text{CDCl}_3$ )

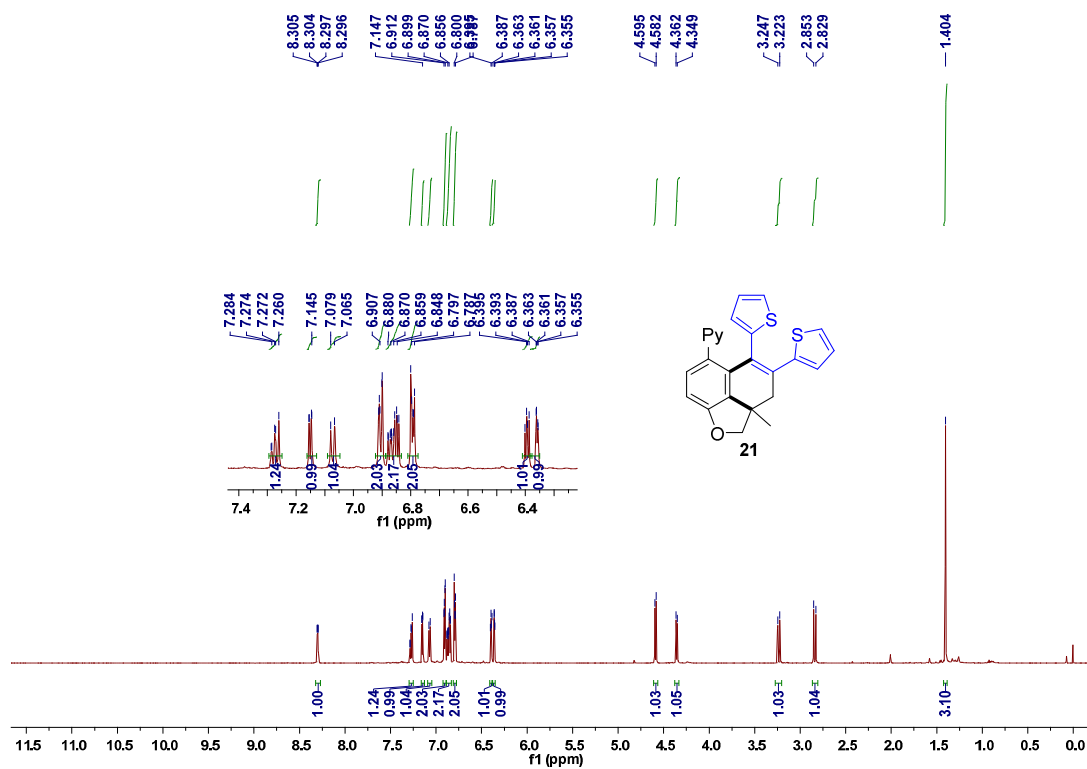

$^{13}\text{C}$  NMR (150 MHz,  $\text{CDCl}_3$ )

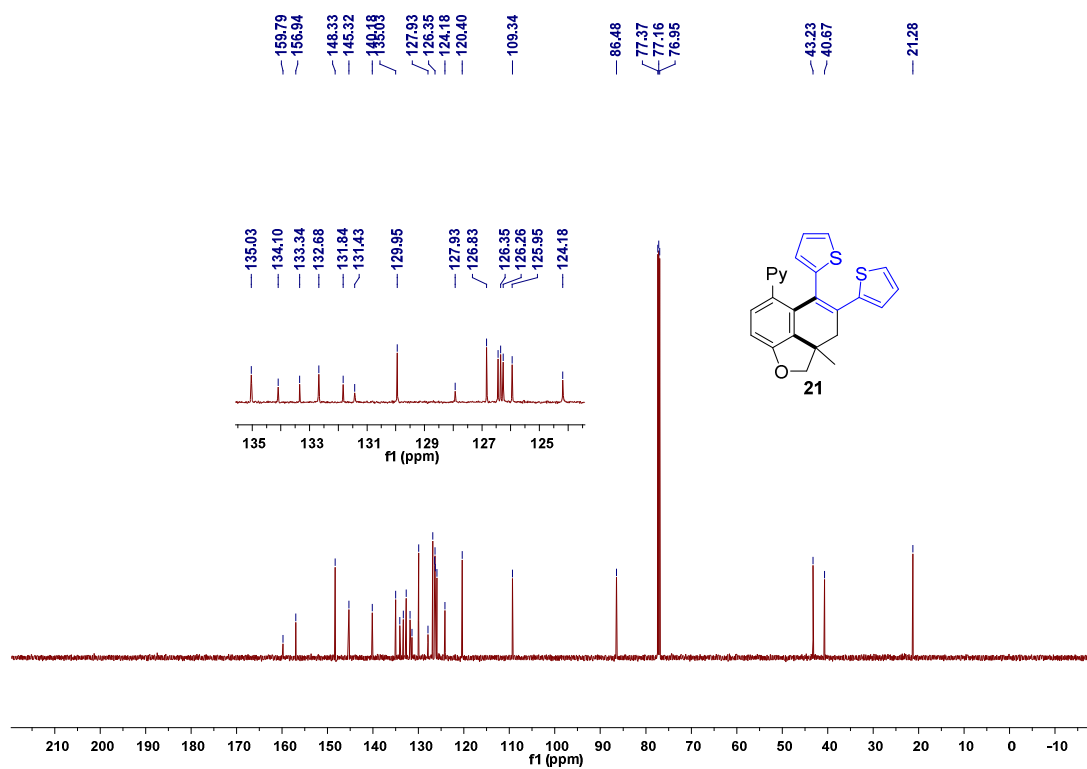

$^1\text{H}$  NMR (600 MHz,  $\text{CDCl}_3$ )

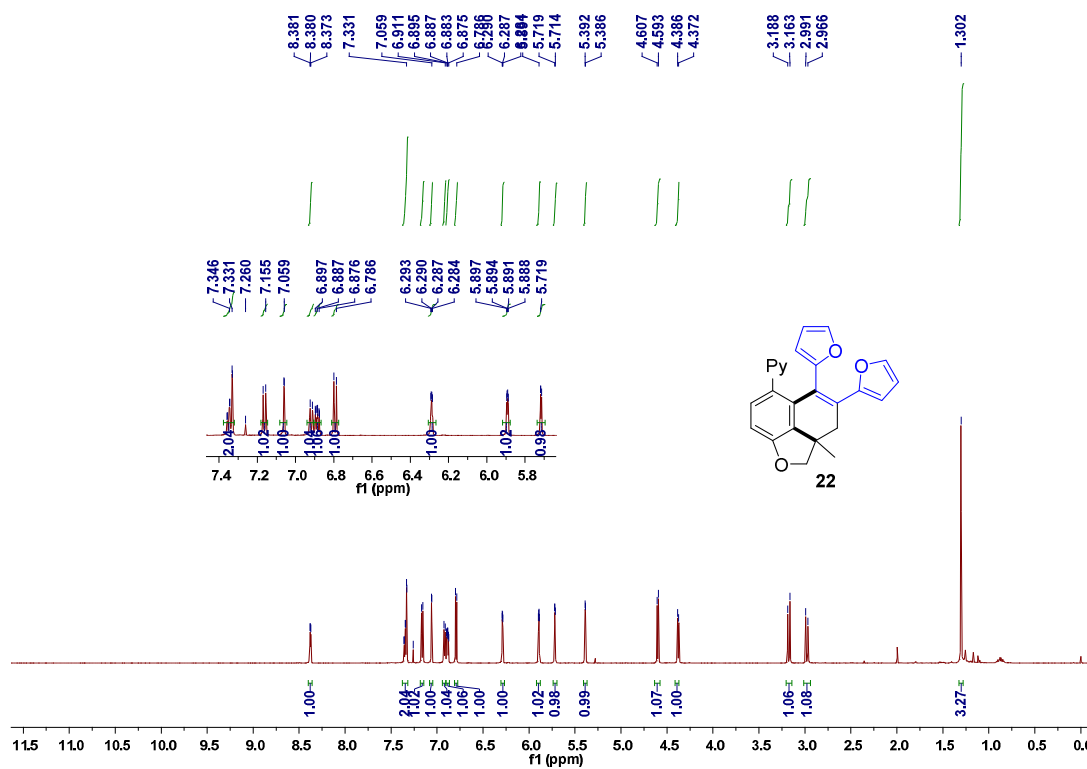



$^{13}\text{C}$  NMR (150 MHz,  $\text{CDCl}_3$ )

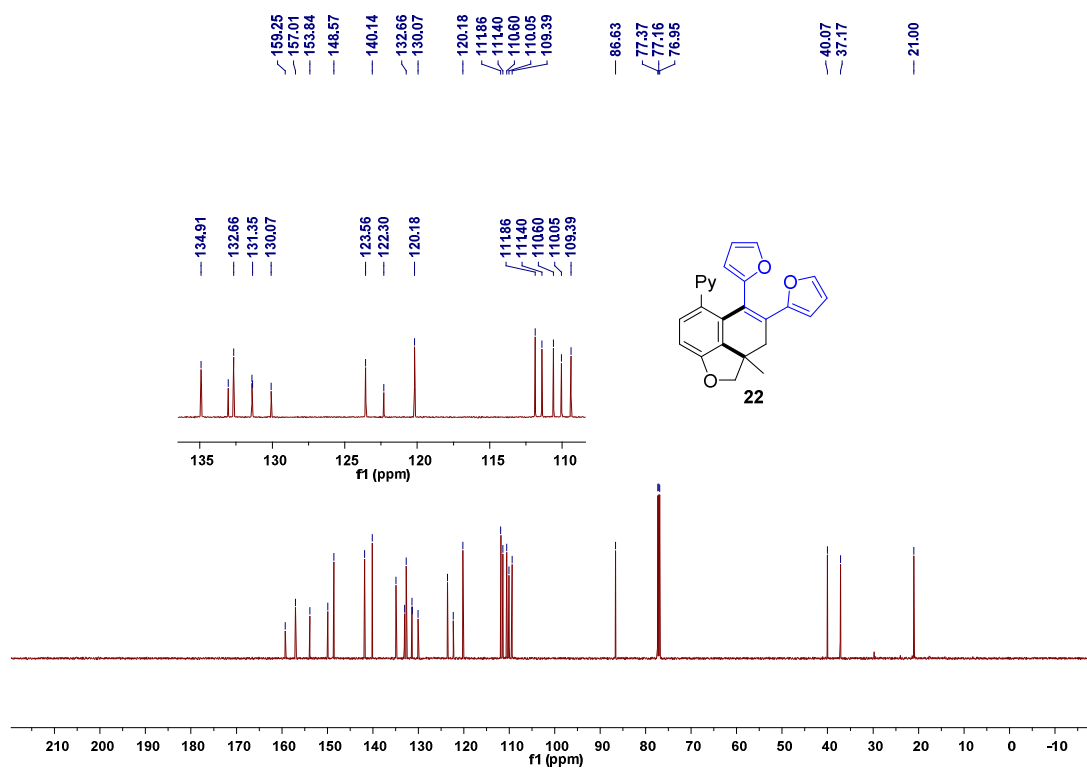

$^1\text{H}$  NMR (600 MHz,  $\text{CDCl}_3$ )

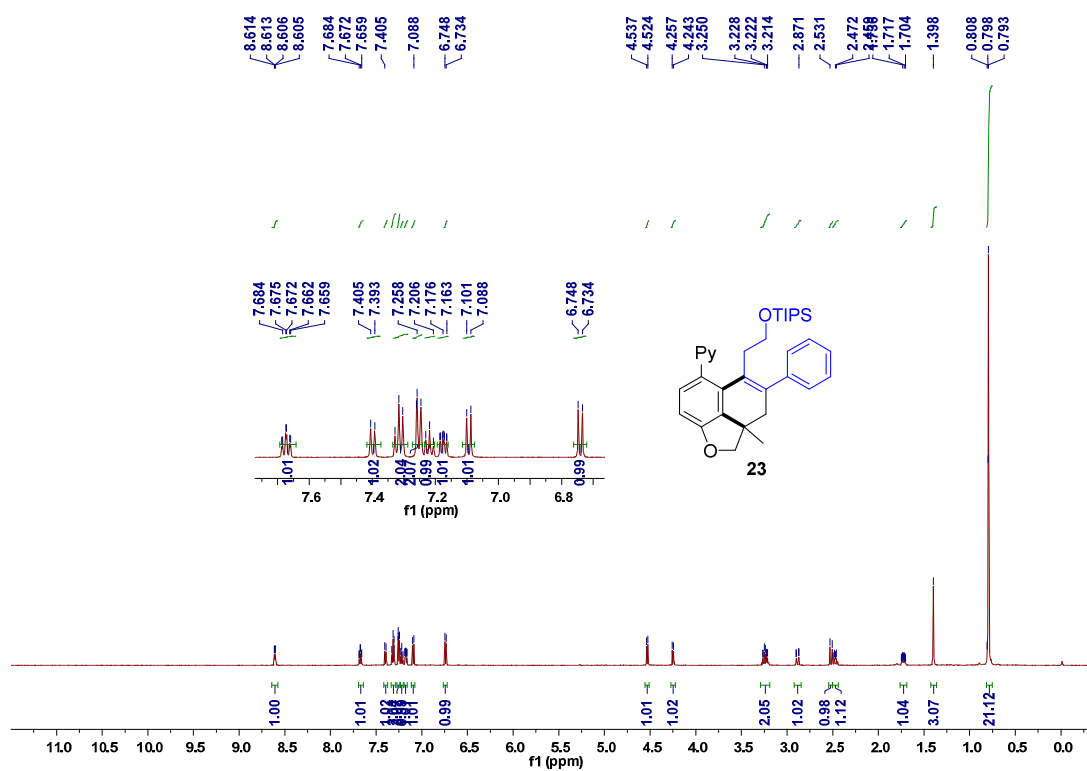

$^{13}\text{C}$  NMR (150 MHz,  $\text{CDCl}_3$ )

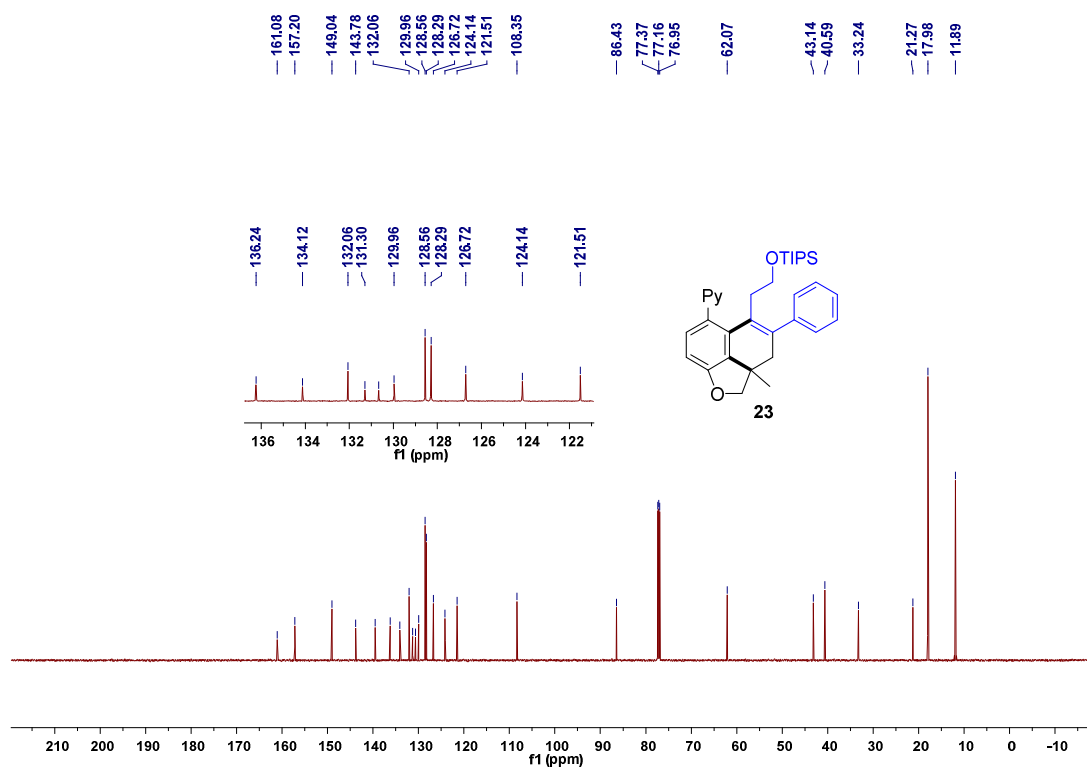

$^1\text{H}$  NMR (600 MHz,  $\text{CDCl}_3$ )

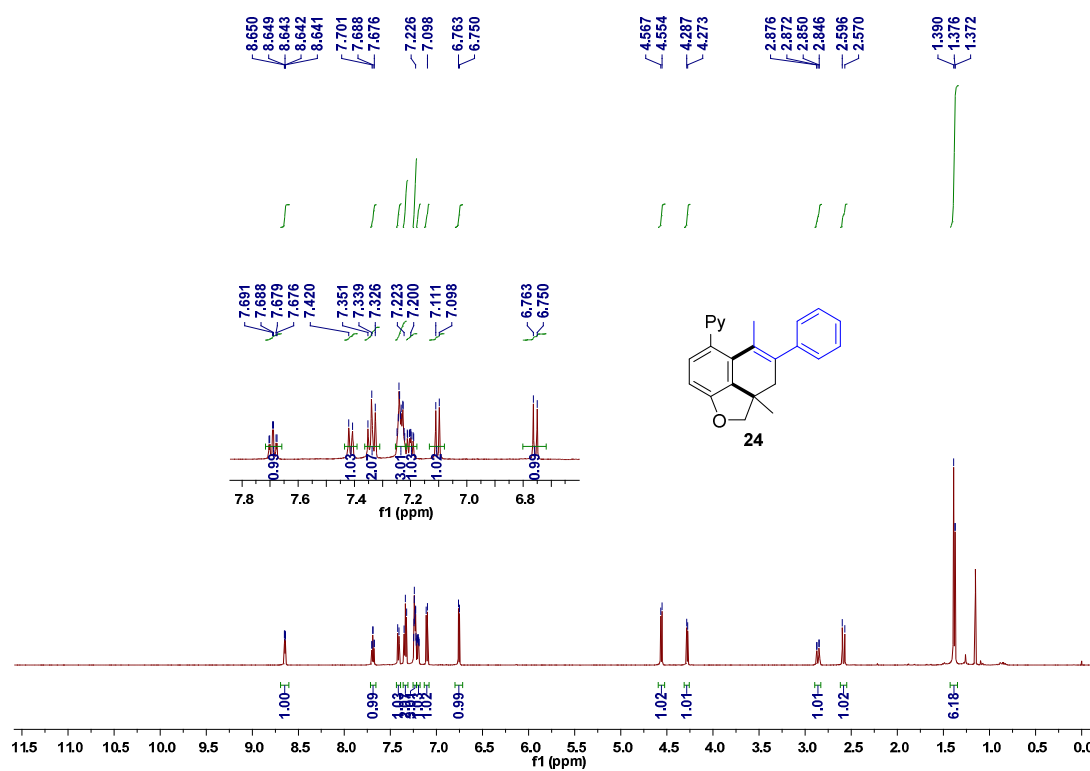

$^{13}\text{C}$  NMR (150 MHz,  $\text{CDCl}_3$ )

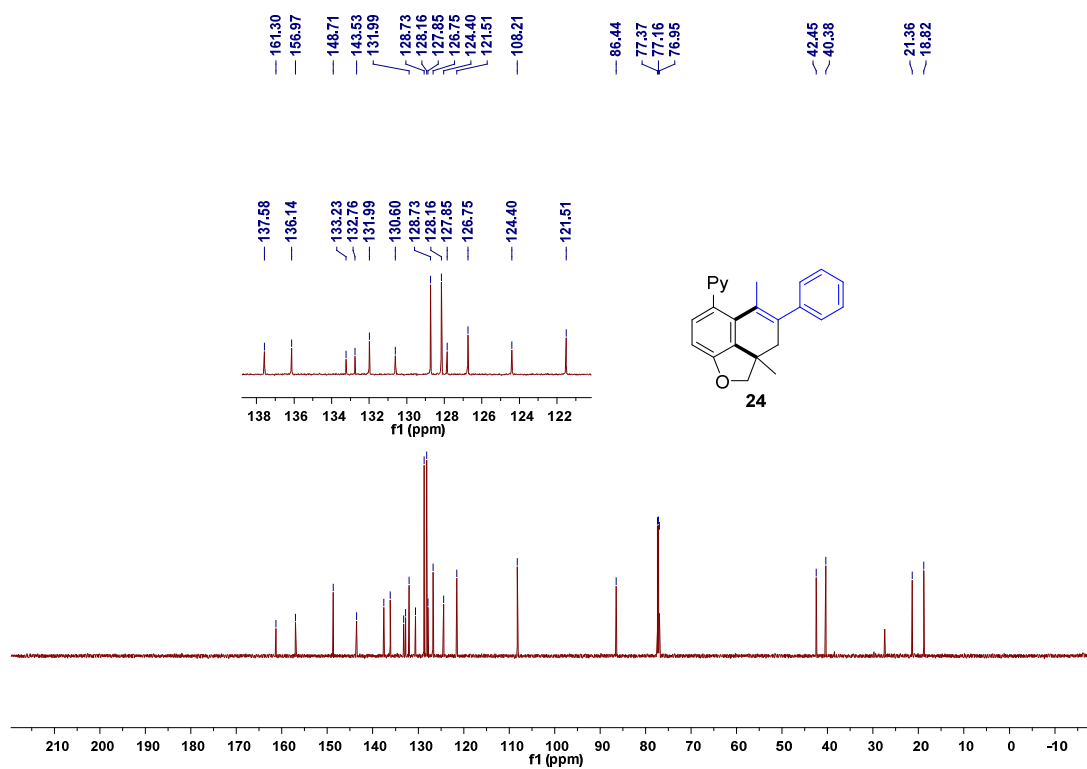

$^1\text{H}$  NMR (600 MHz,  $\text{CDCl}_3$ )

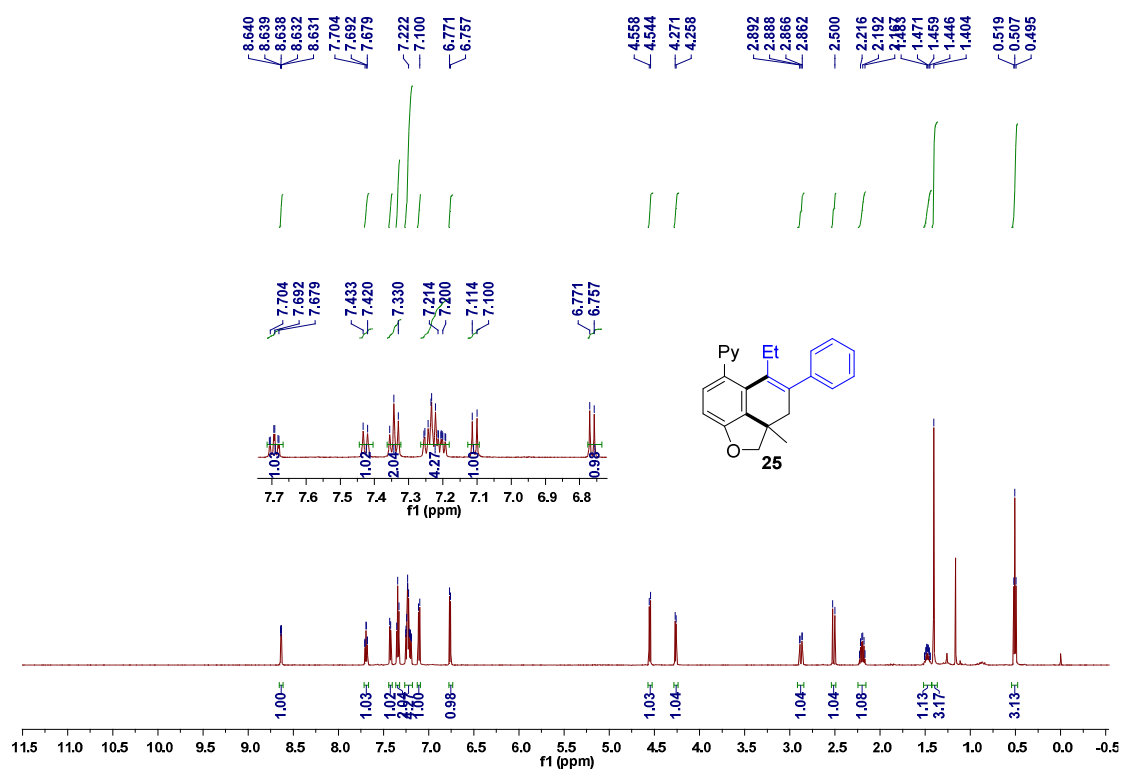

NOESY-1D  $^1\text{H}$  NMR of **25** (400 MHz,  $\text{CDCl}_3$ )

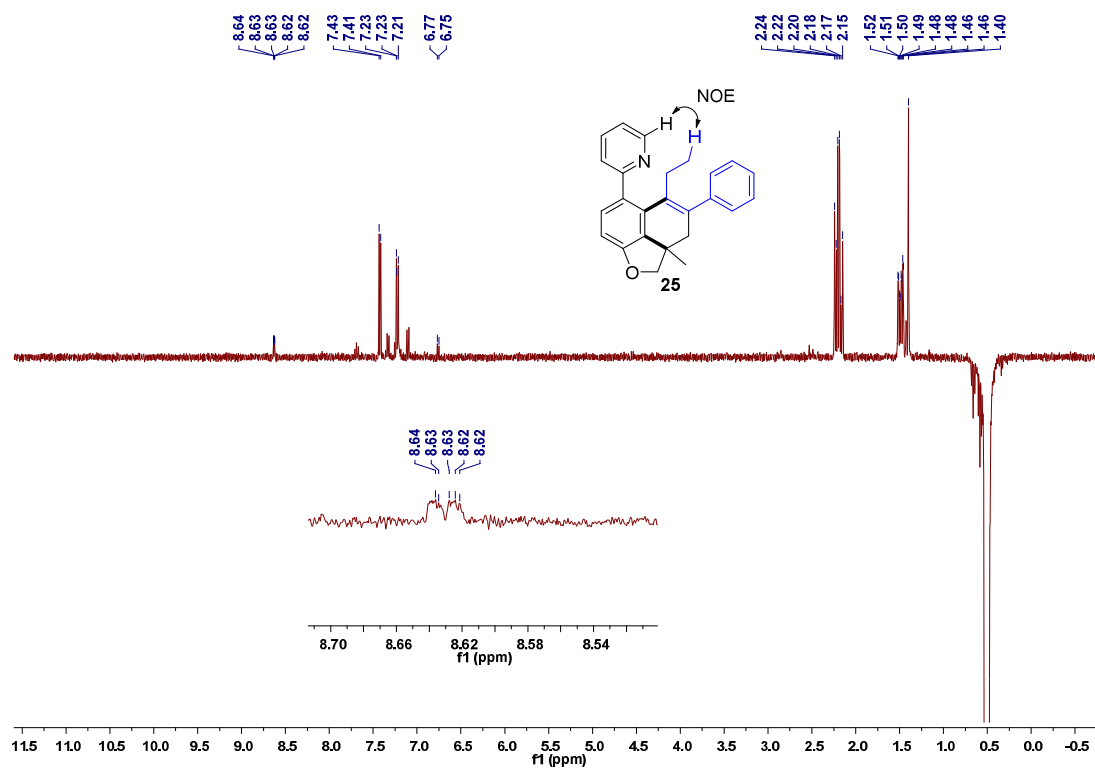

$^{13}\text{C}$  NMR (150 MHz,  $\text{CDCl}_3$ )

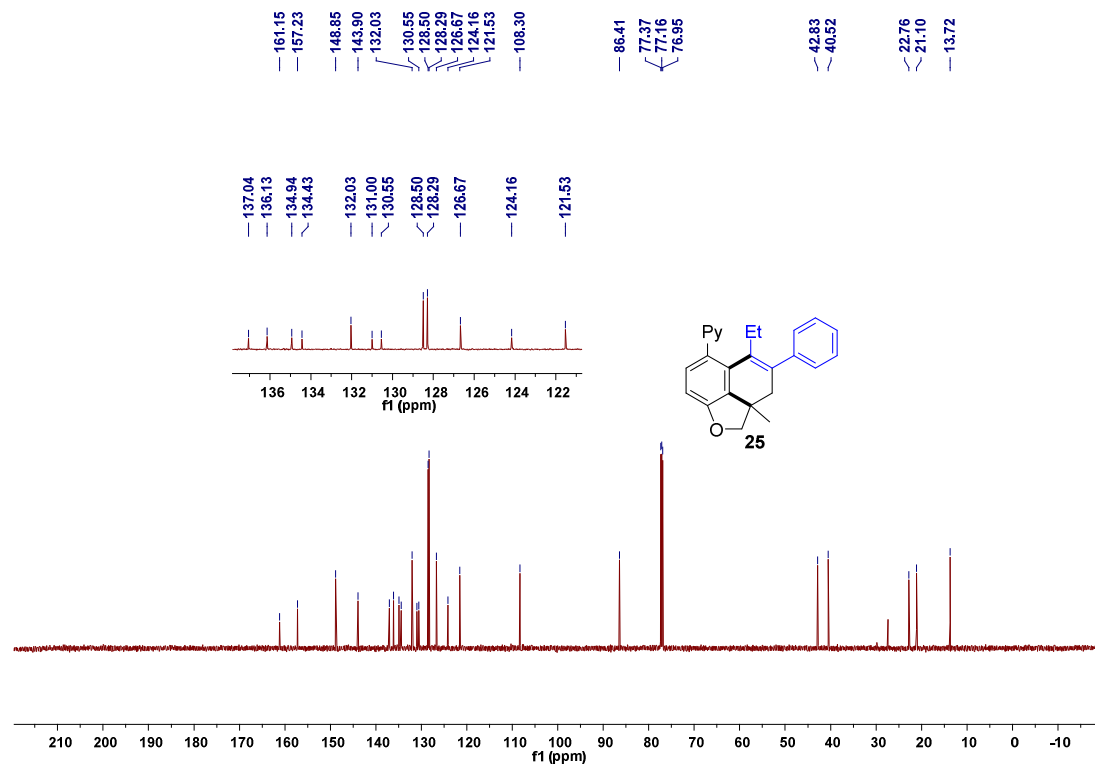

$^1\text{H}$  NMR (600 MHz,  $\text{CDCl}_3$ )

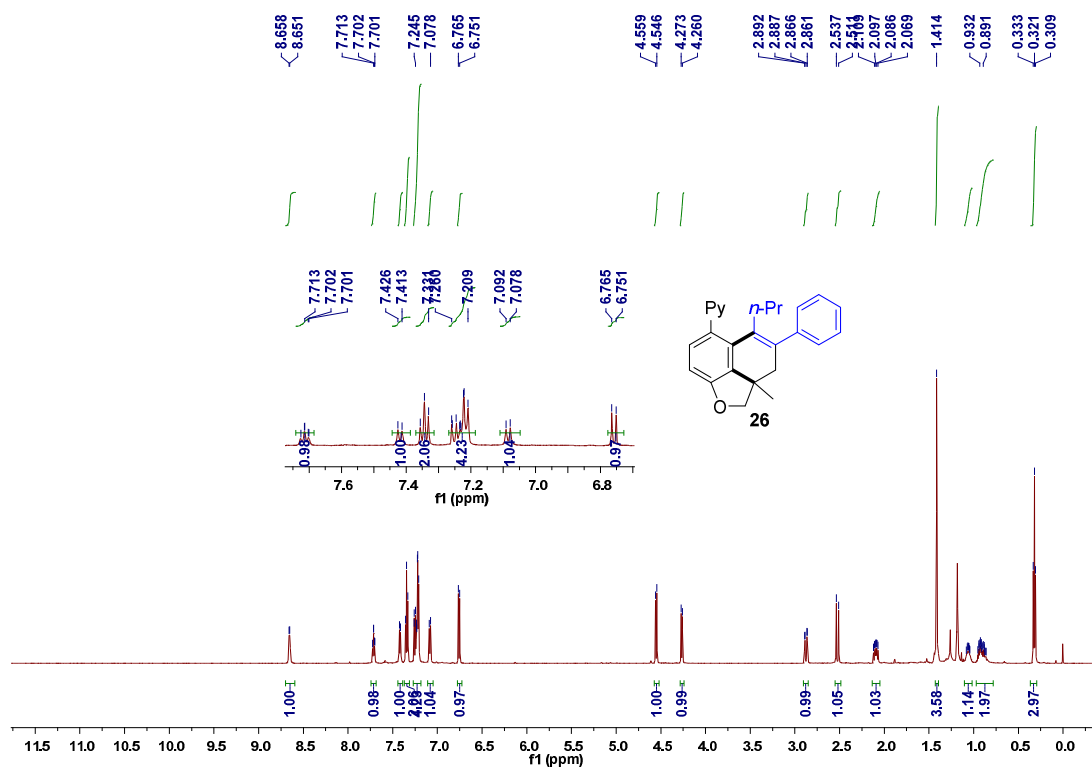

$^{13}\text{C}$  NMR (150 MHz,  $\text{CDCl}_3$ )

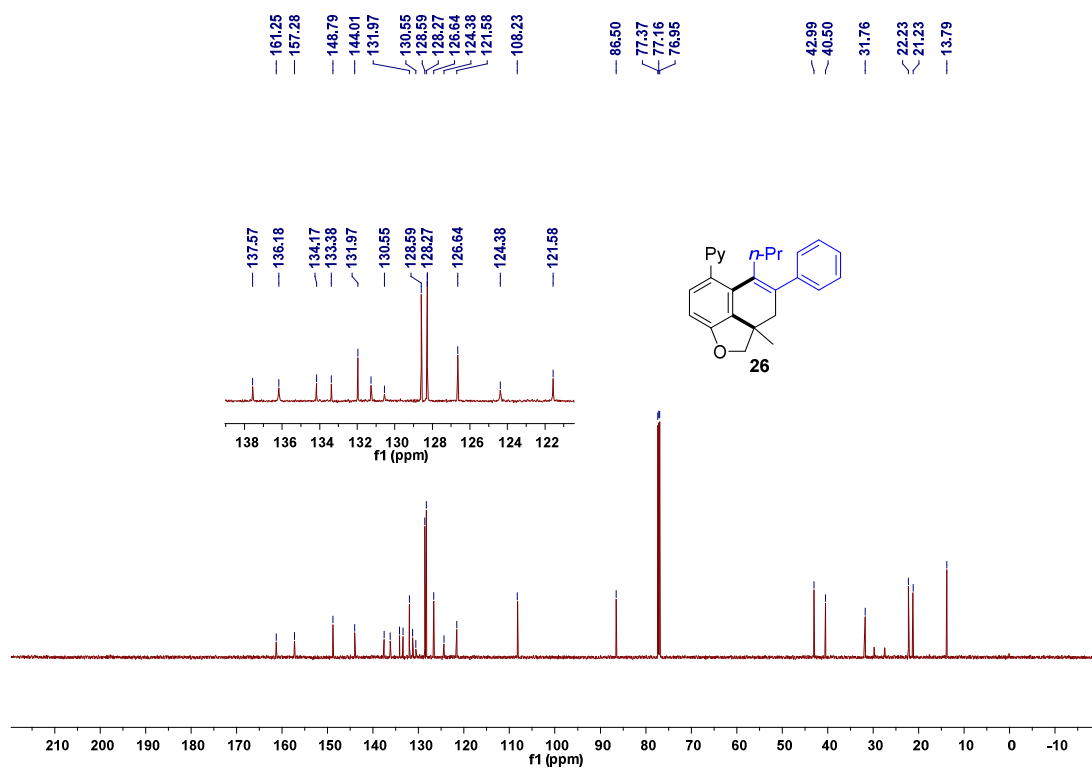

$^1\text{H}$  NMR (600 MHz,  $\text{CDCl}_3$ )

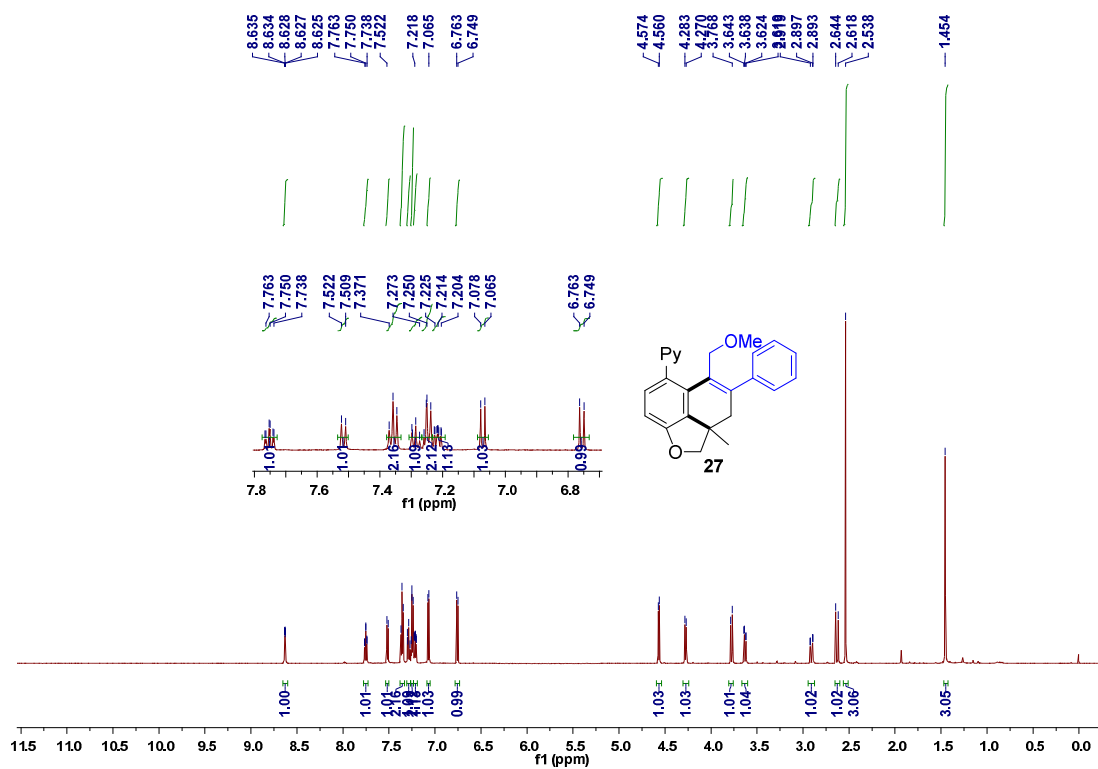

$^{13}\text{C}$  NMR (150 MHz,  $\text{CDCl}_3$ )

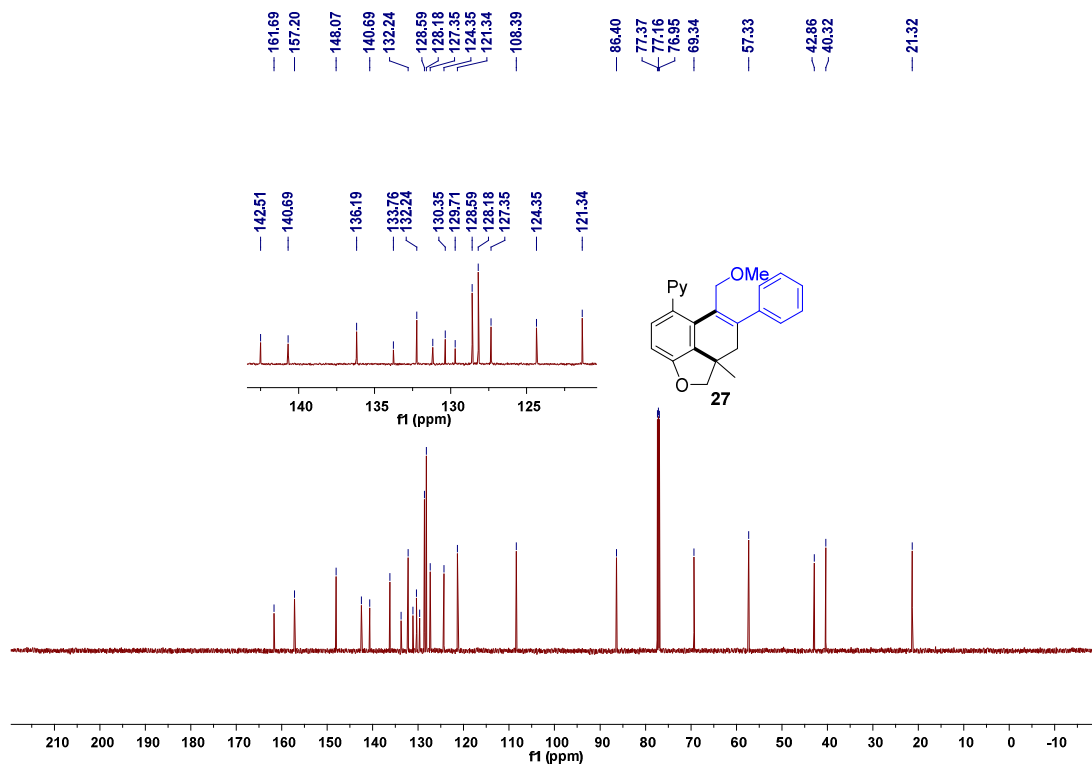

$^1\text{H}$  NMR (600 MHz,  $\text{CDCl}_3$ )

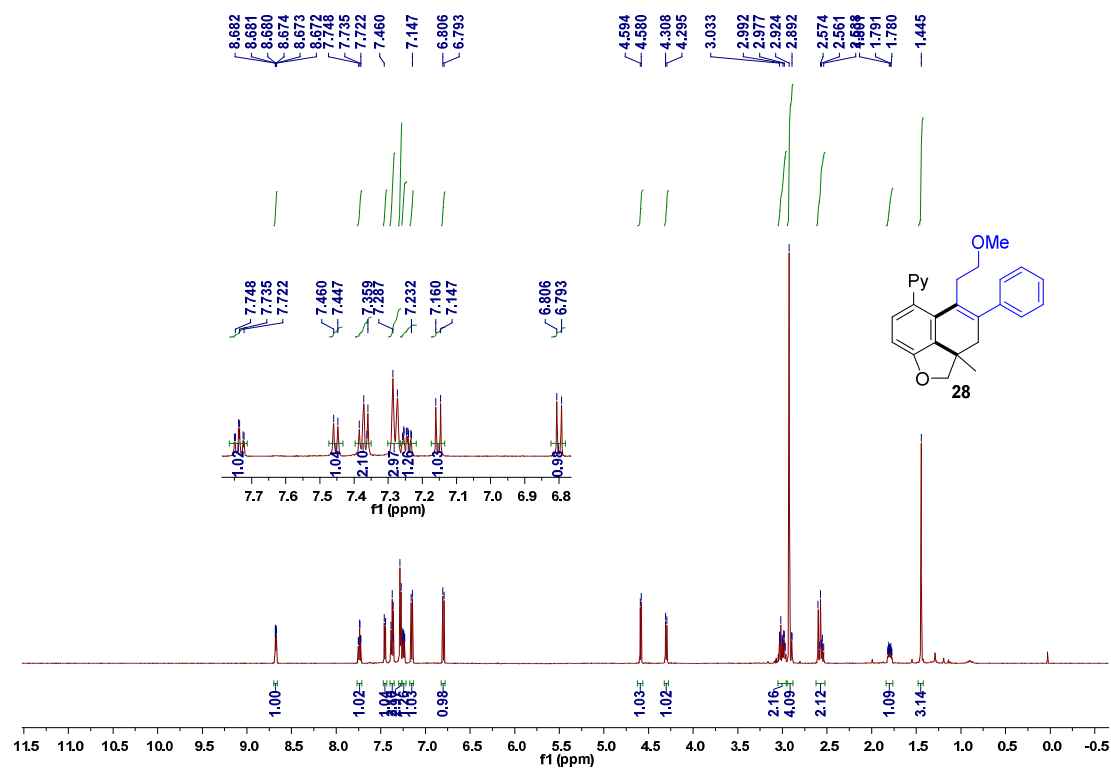

$^{13}\text{C}$  NMR (150 MHz,  $\text{CDCl}_3$ )

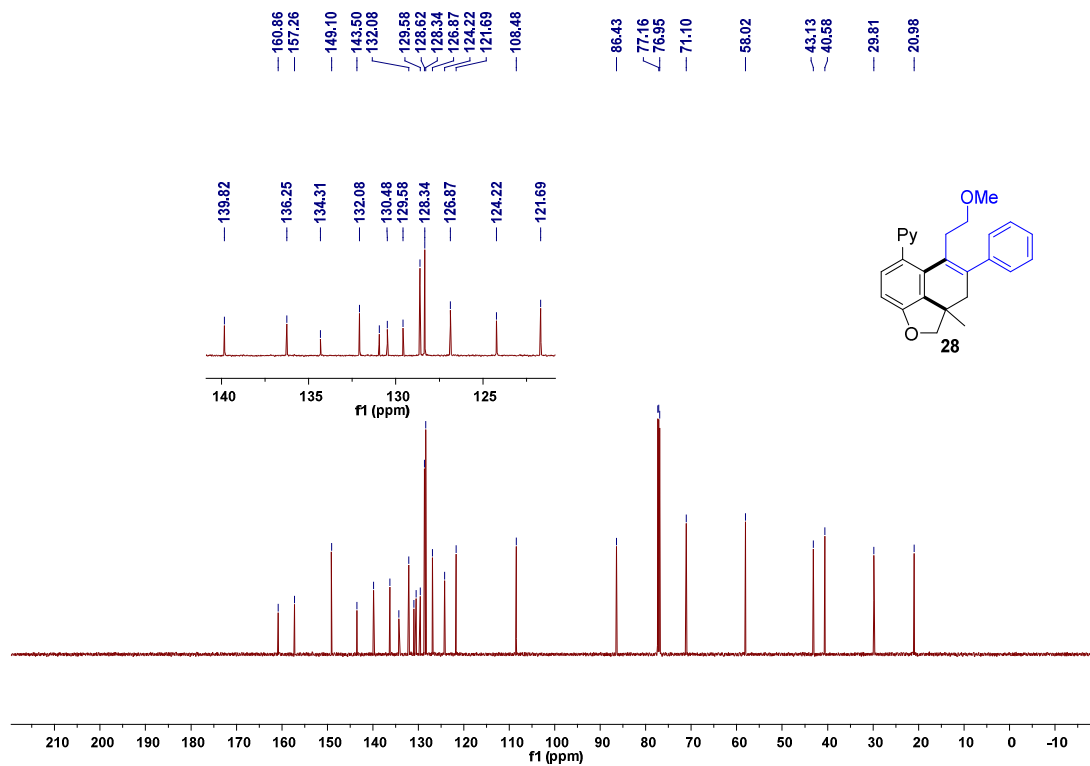

$^1\text{H}$  NMR (400 MHz,  $\text{CDCl}_3$ )

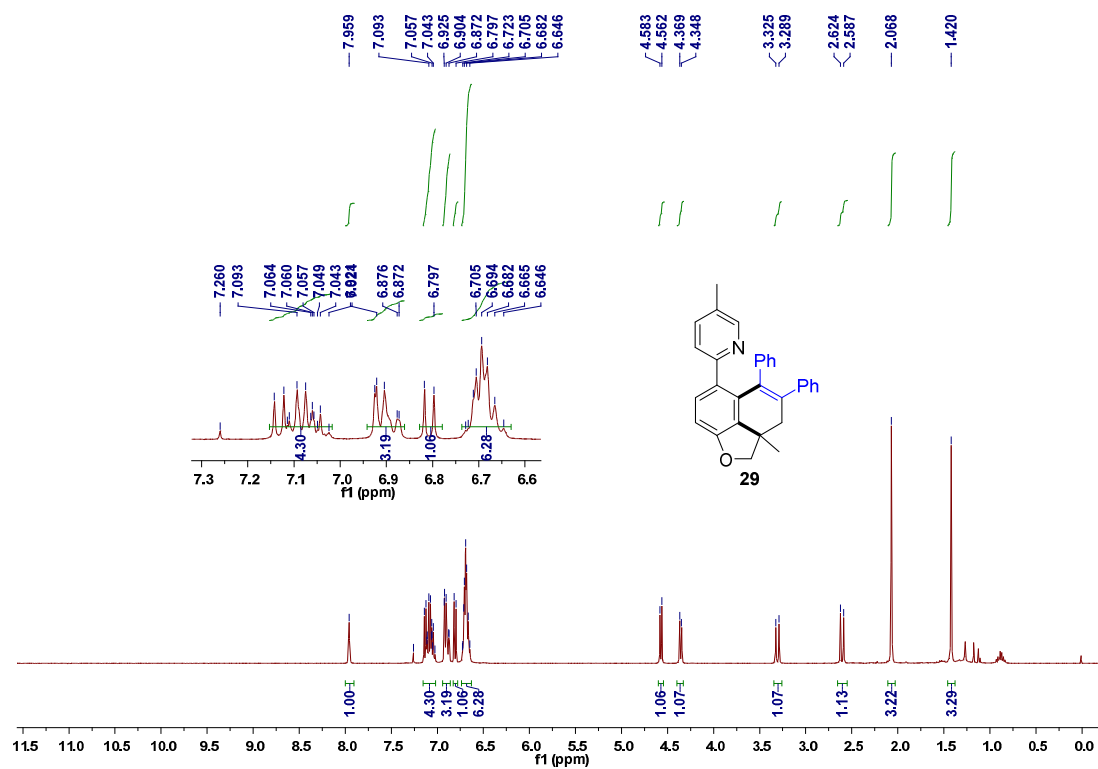

$^{13}\text{C}$  NMR (100 MHz,  $\text{CDCl}_3$ )

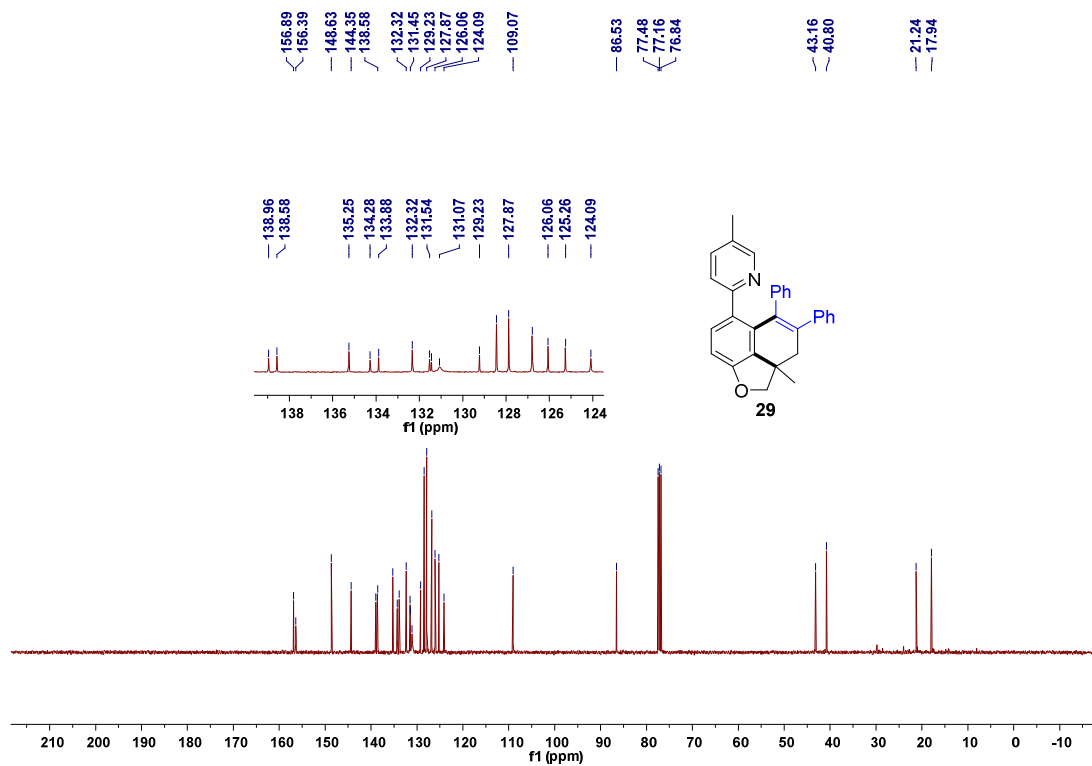



$^1\text{H}$  NMR (600 MHz,  $\text{CDCl}_3$ )

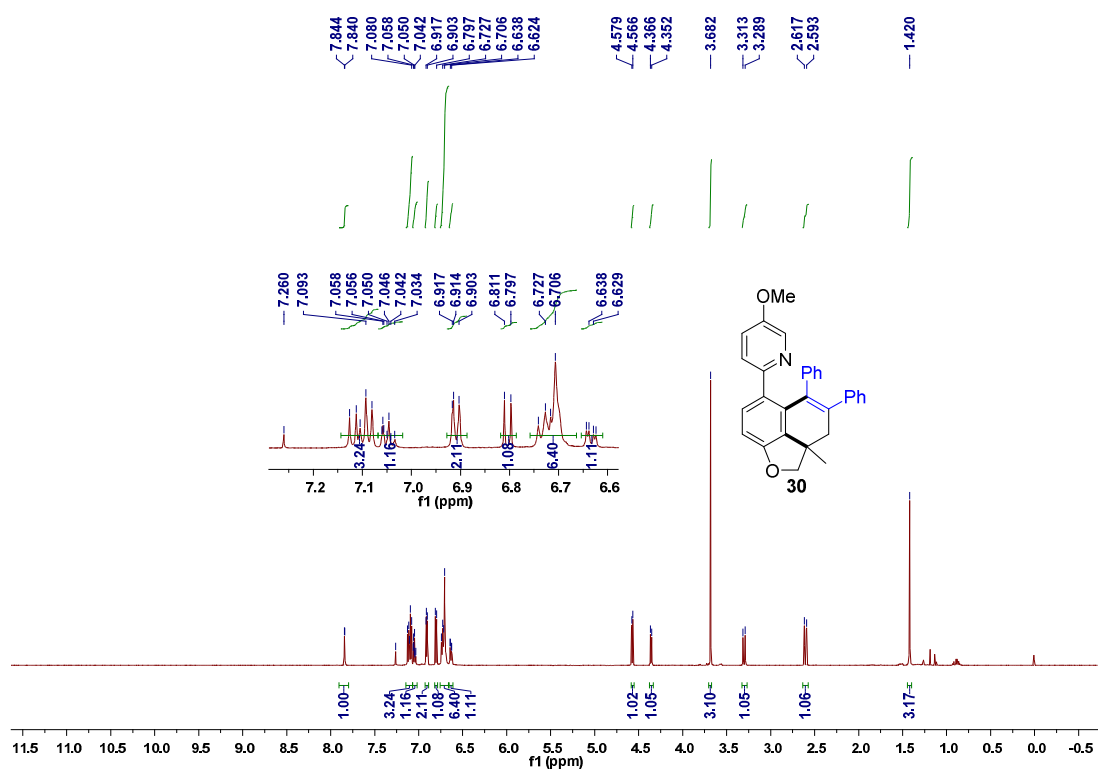

$^{13}\text{C}$  NMR (150 MHz,  $\text{CDCl}_3$ )

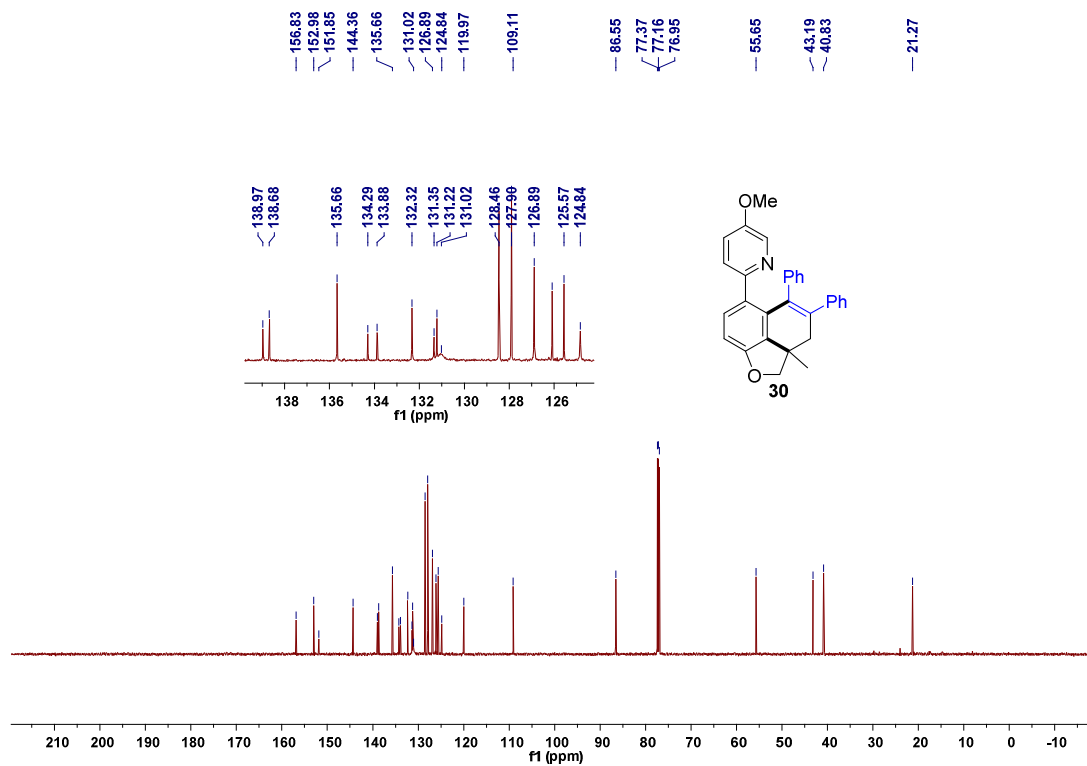

$^1\text{H}$  NMR (400 MHz,  $\text{CDCl}_3$ )

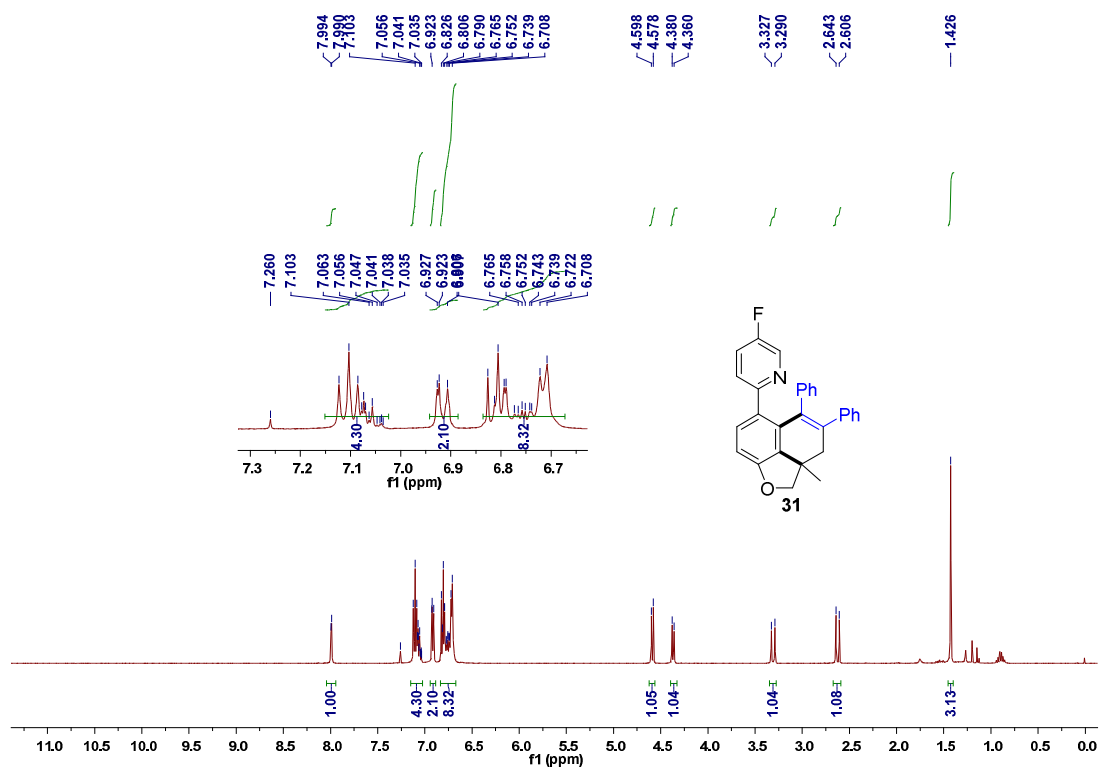

$^{13}\text{C}$  NMR (100 MHz,  $\text{CDCl}_3$ )

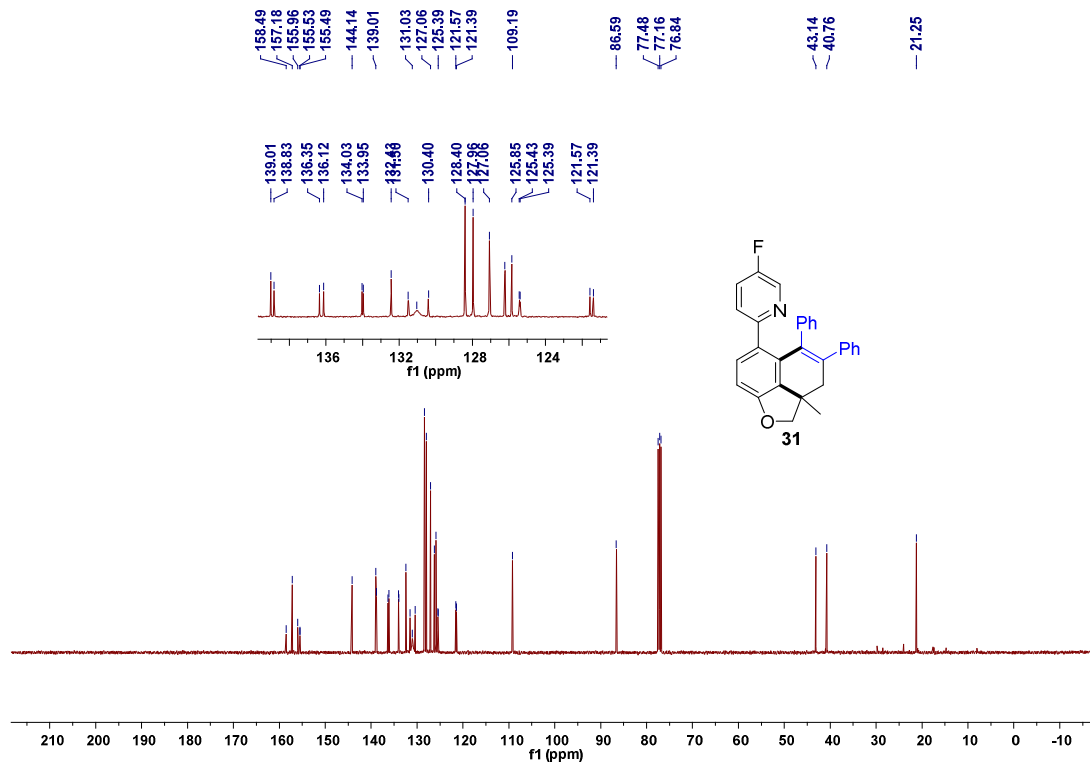

$^{19}\text{F}$  NMR (376 MHz,  $\text{CDCl}_3$ )

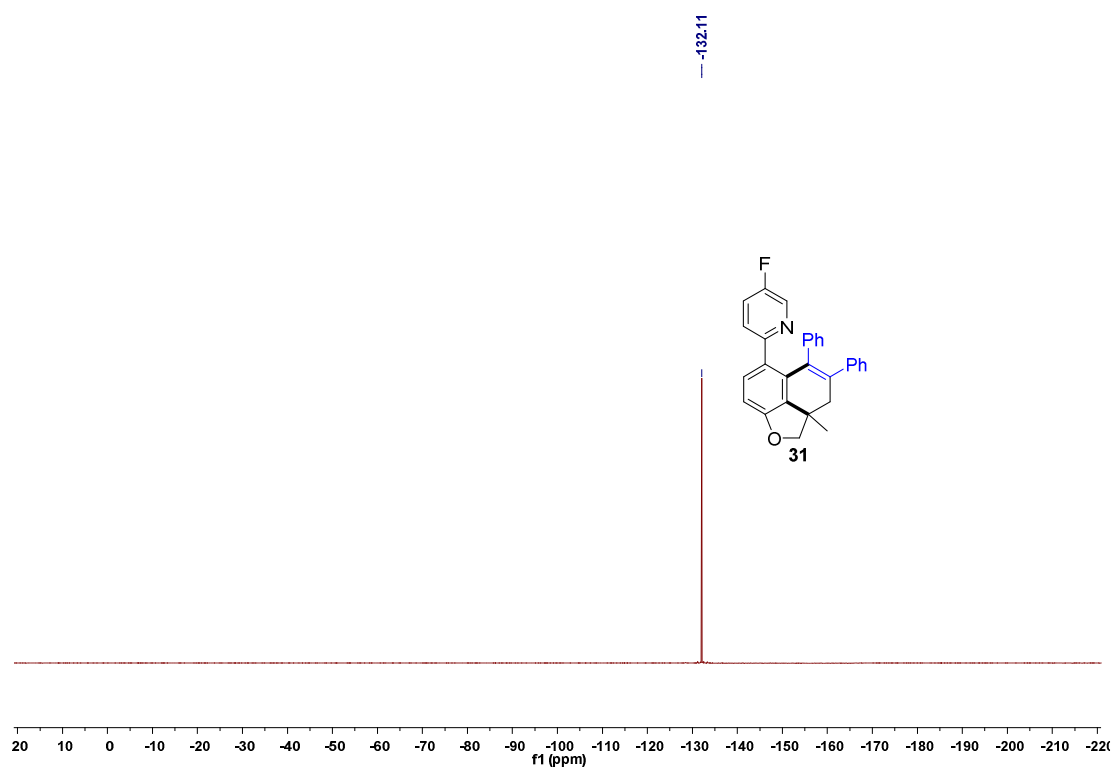

$^1\text{H}$  NMR (600 MHz,  $\text{CDCl}_3$ )

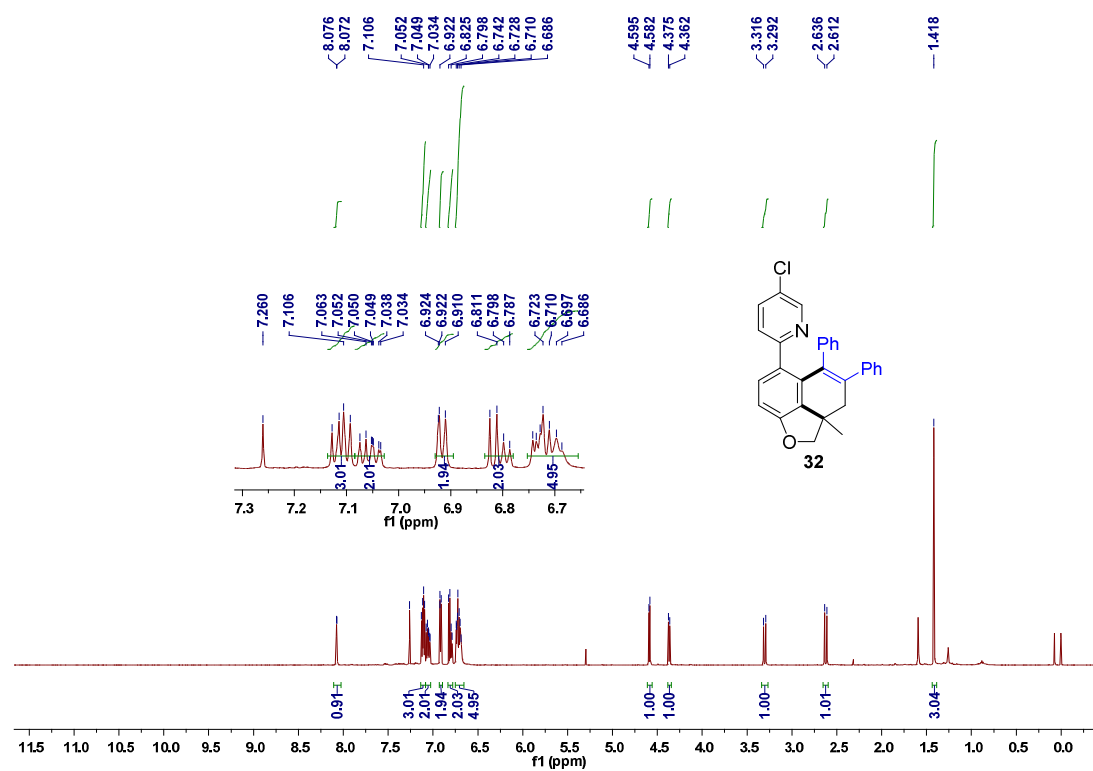

$^{13}\text{C}$  NMR (150 MHz,  $\text{CDCl}_3$ )

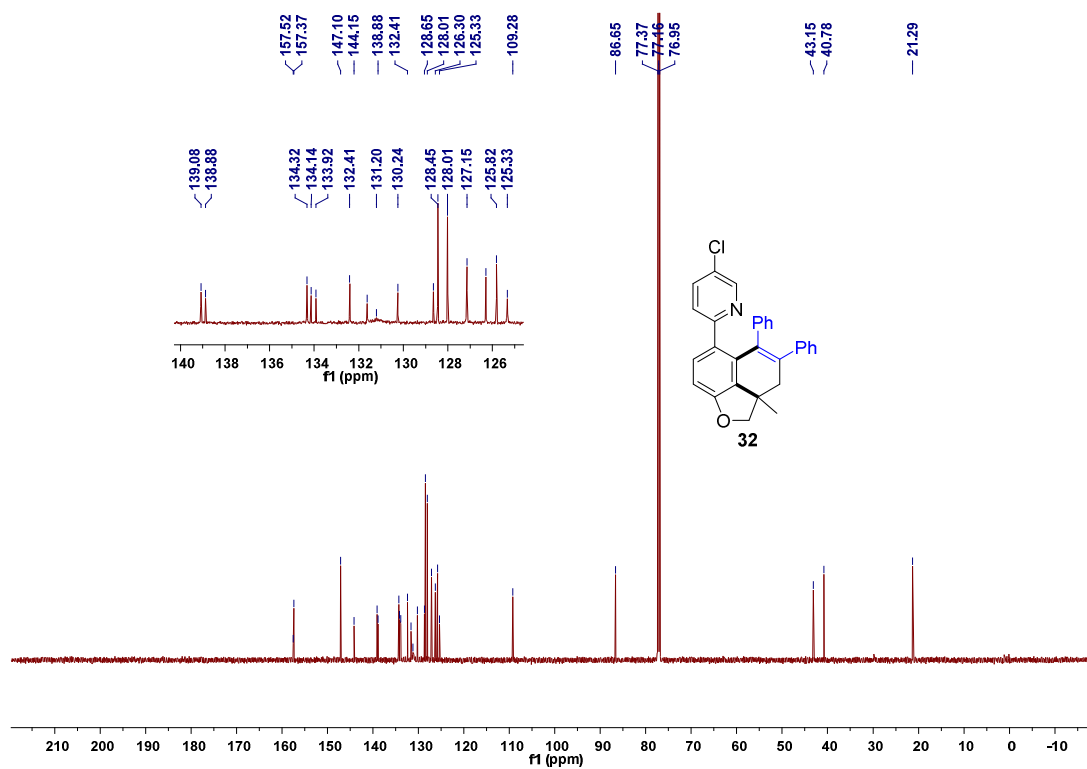

$^1\text{H}$  NMR (600 MHz,  $\text{CDCl}_3$ )

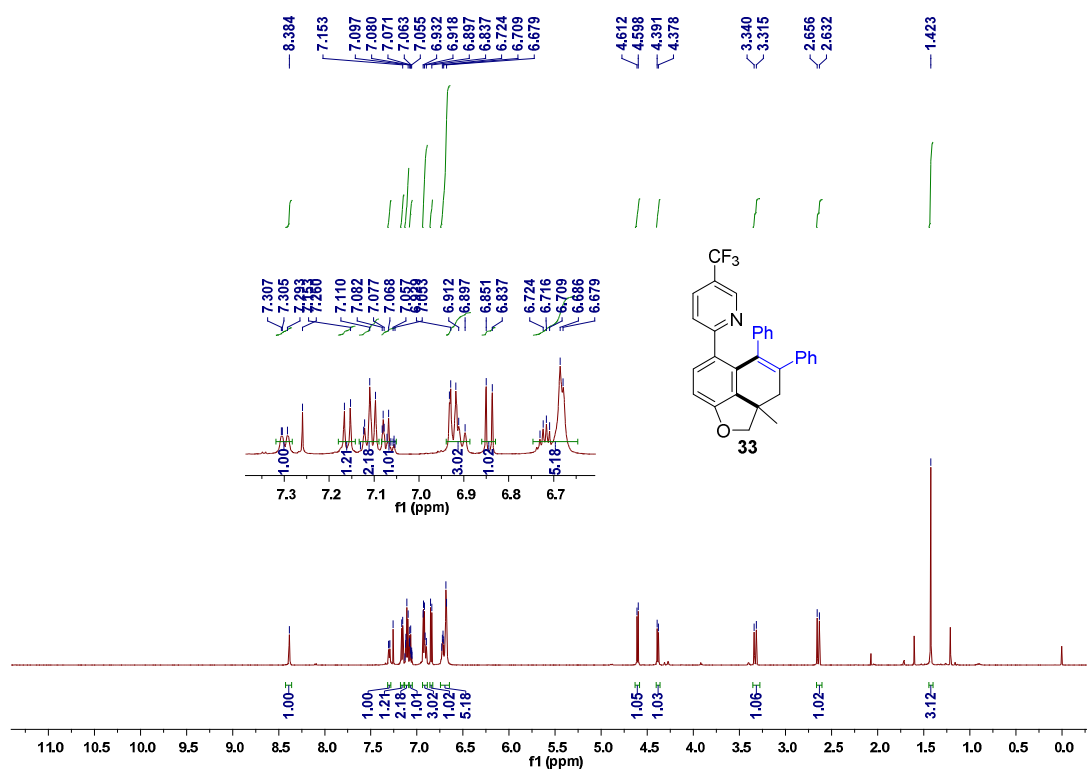

$^{13}\text{C}$  NMR (150 MHz,  $\text{CDCl}_3$ )

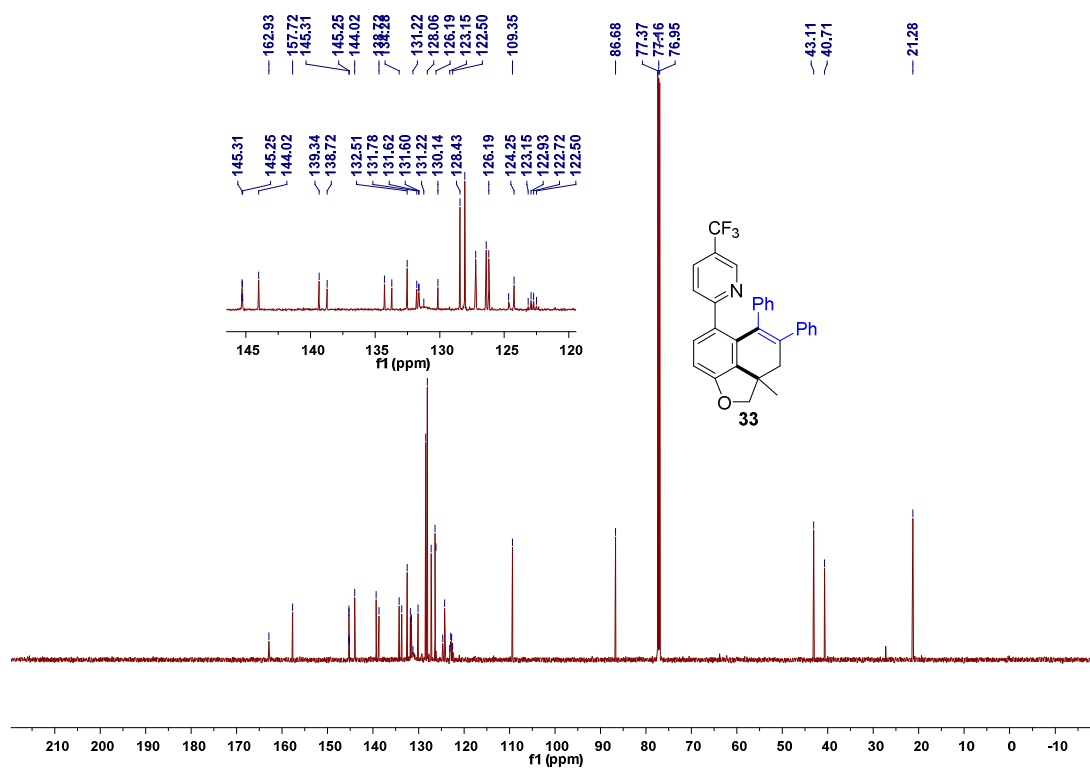

$^{19}\text{F}$  NMR (565 MHz,  $\text{CDCl}_3$ )

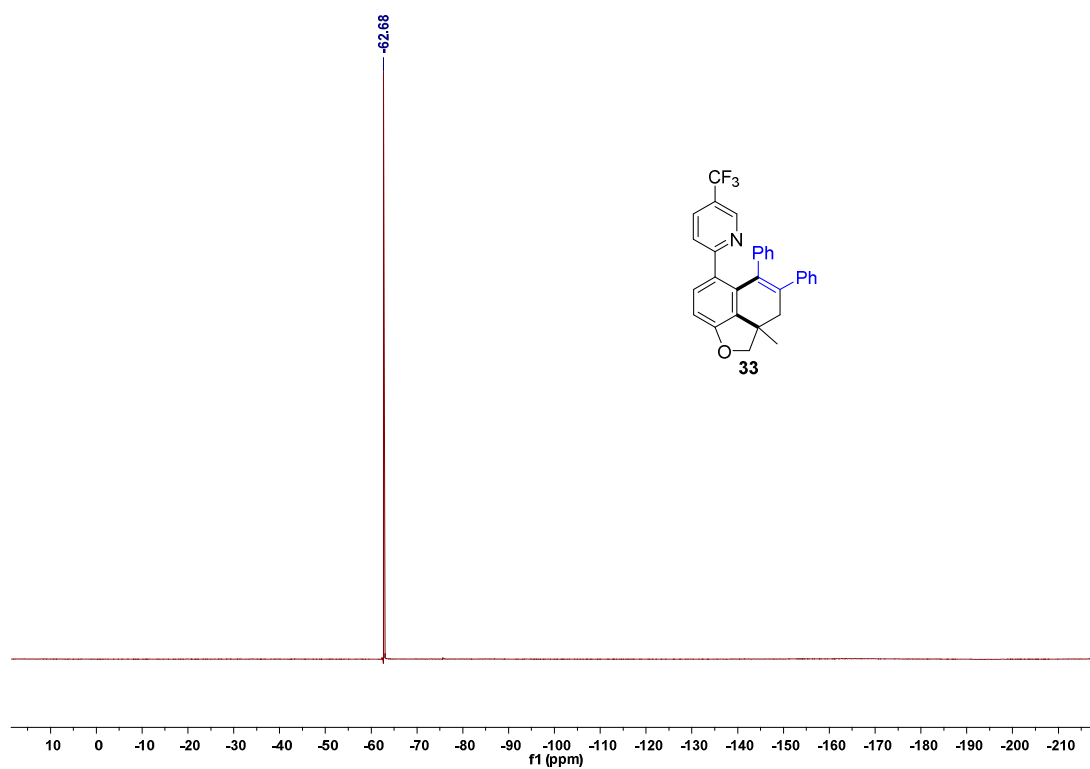

$^1\text{H}$  NMR (400 MHz,  $\text{CDCl}_3$ )

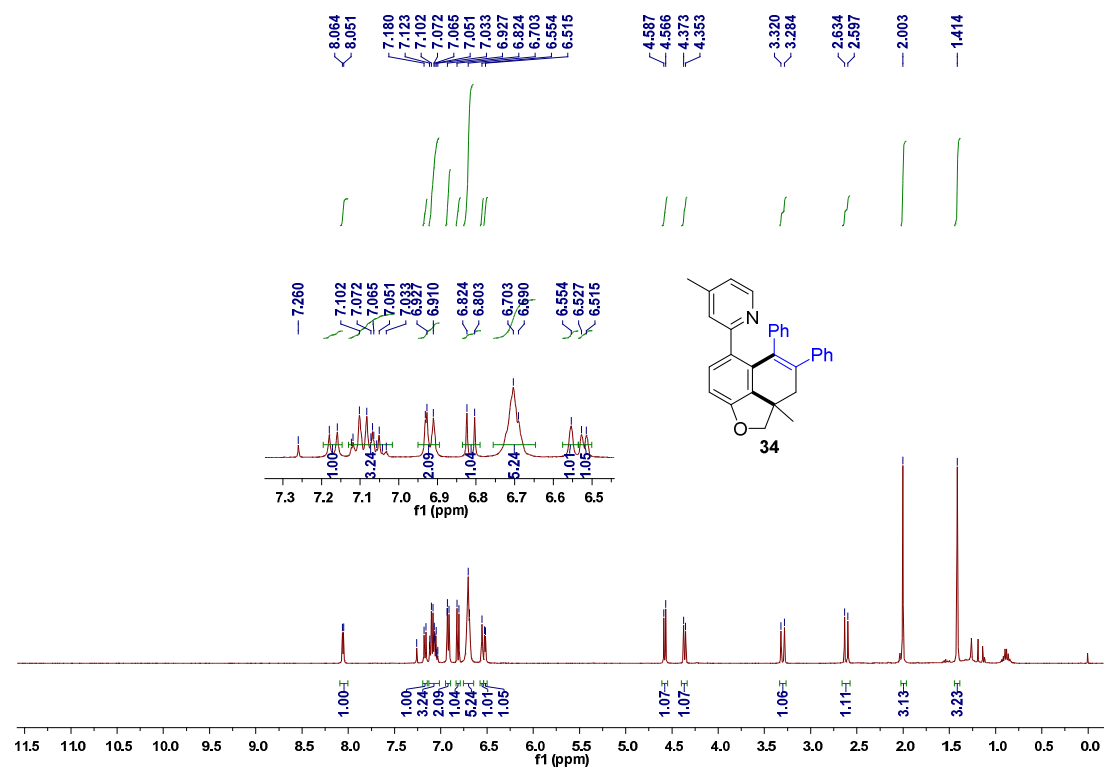

$^{13}\text{C}$  NMR (100 MHz,  $\text{CDCl}_3$ )

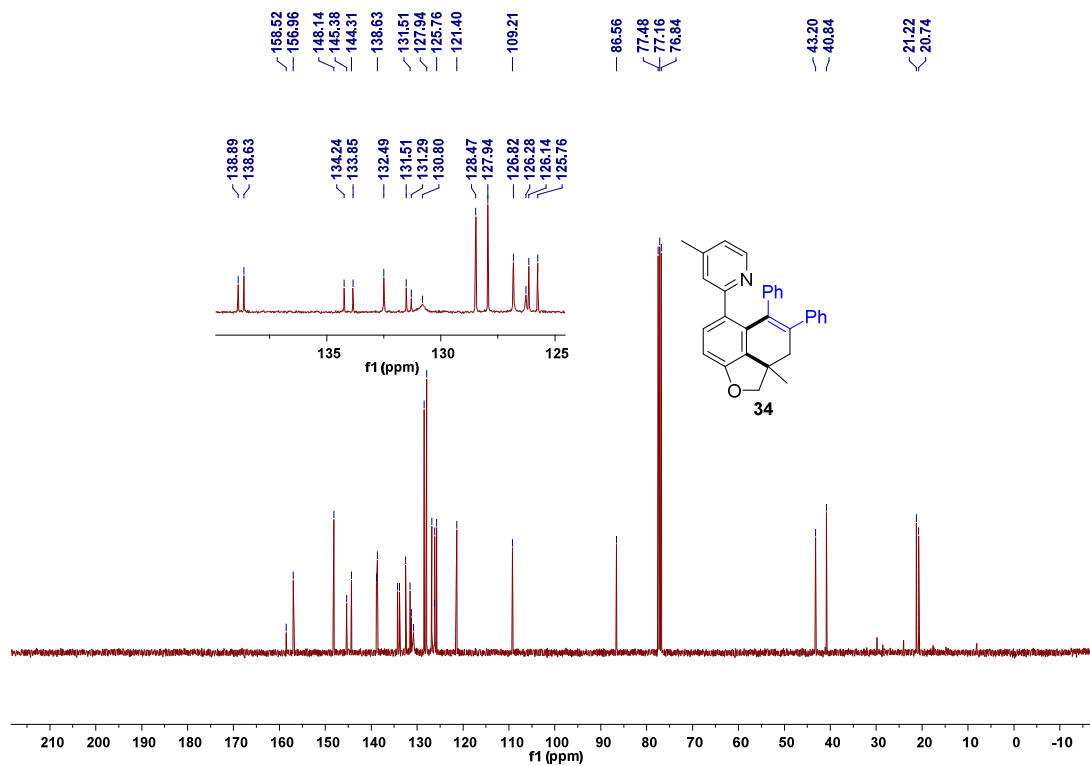

$^1\text{H}$  NMR (600 MHz,  $\text{CDCl}_3$ )

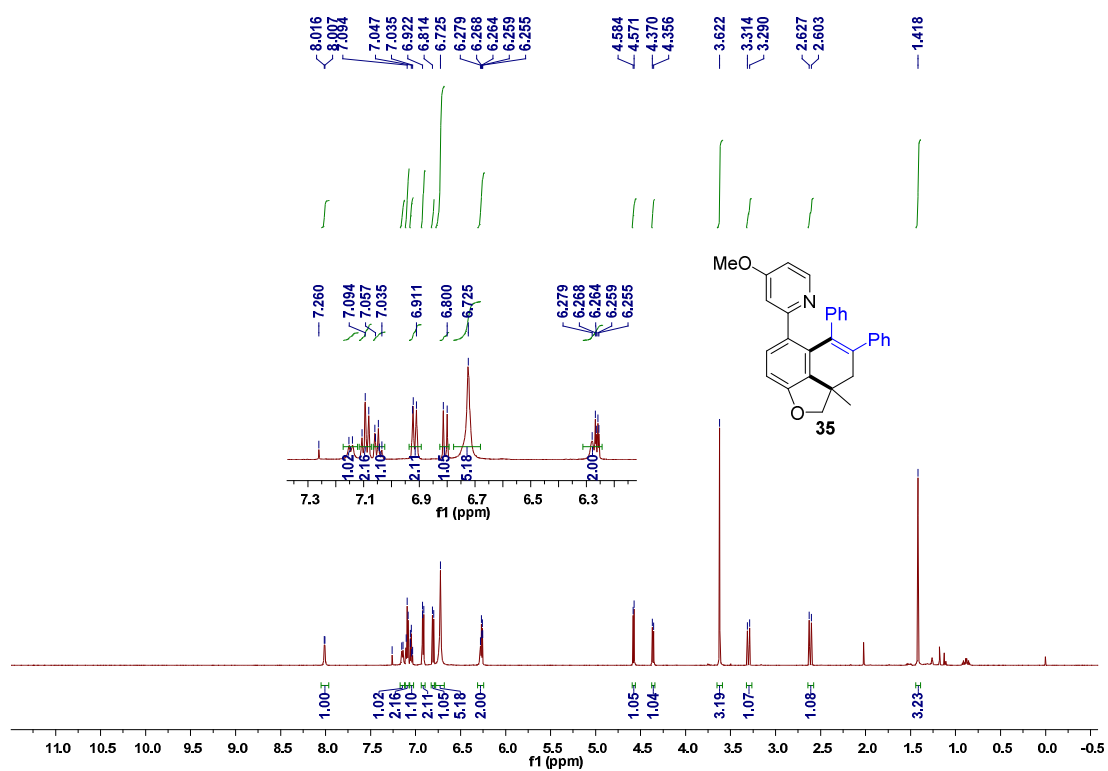

$^{13}\text{C}$  NMR (150 MHz,  $\text{CDCl}_3$ )

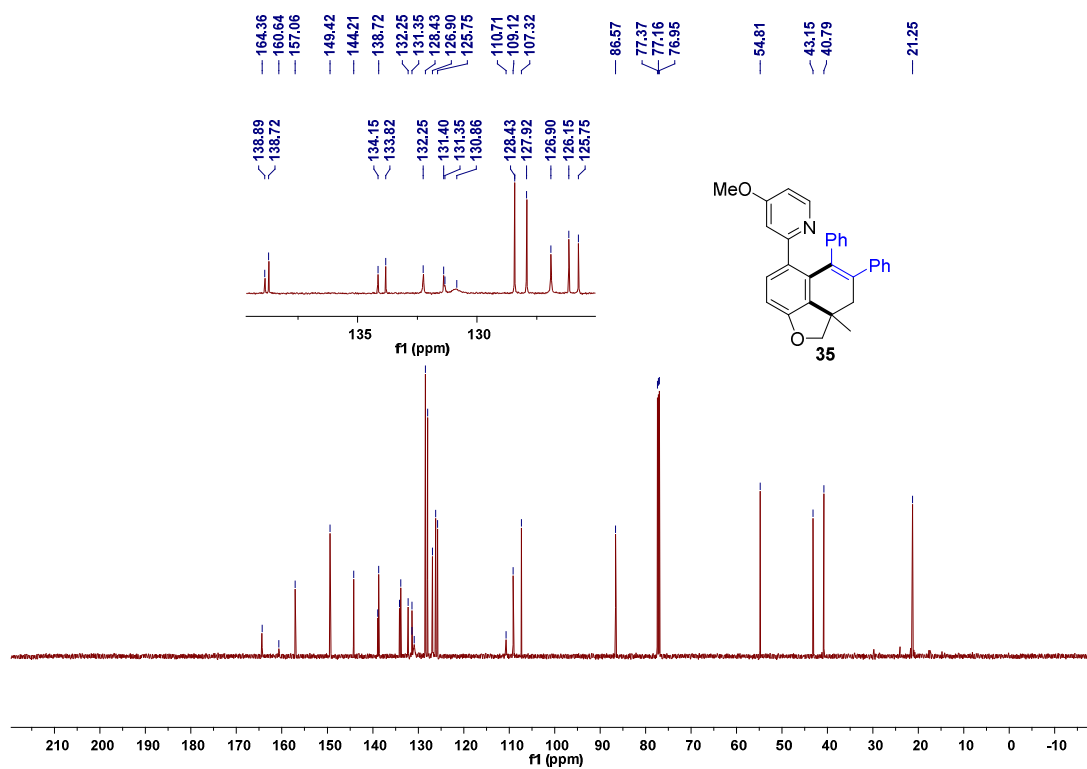

$^1\text{H}$  NMR (600 MHz,  $\text{CDCl}_3$ )

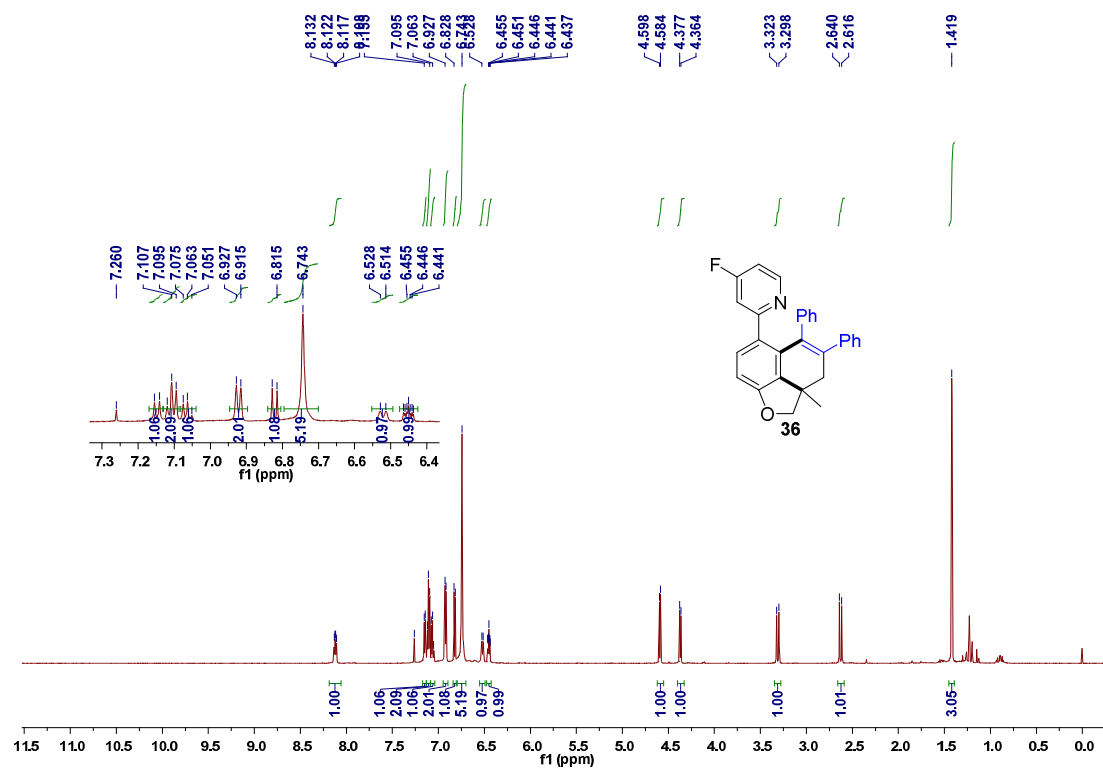

$^{13}\text{C}$  NMR (150 MHz,  $\text{CDCl}_3$ )

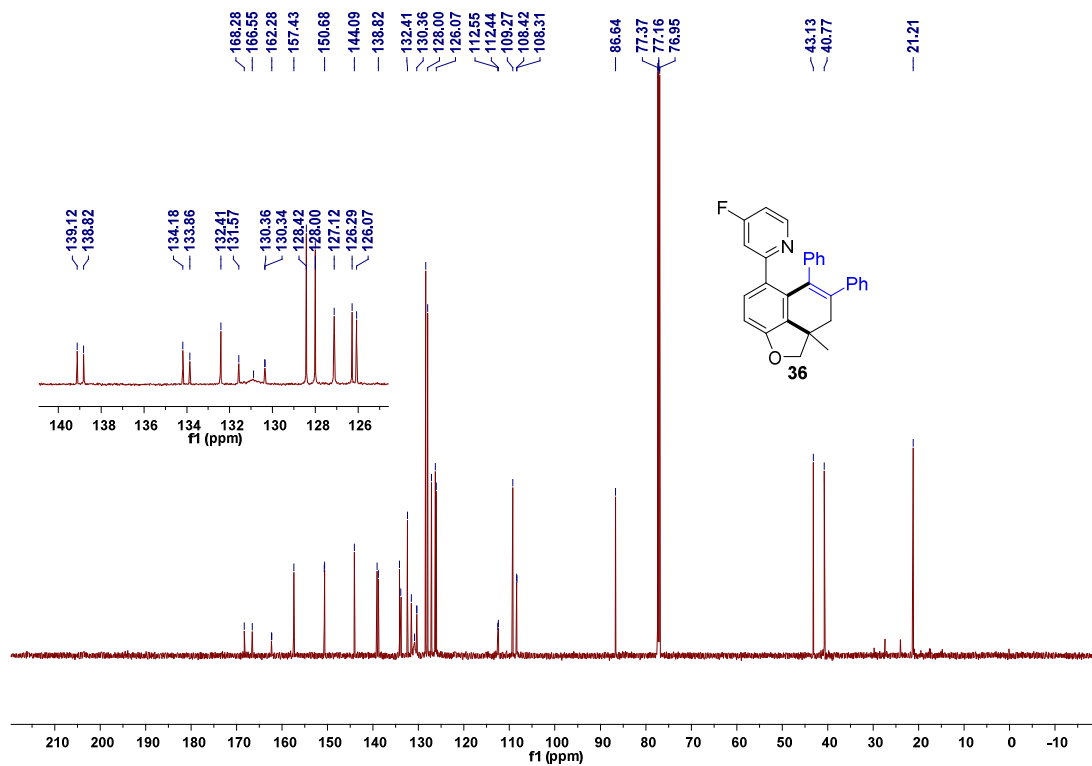



$^{19}\text{F}$  NMR (565 MHz,  $\text{CDCl}_3$ )

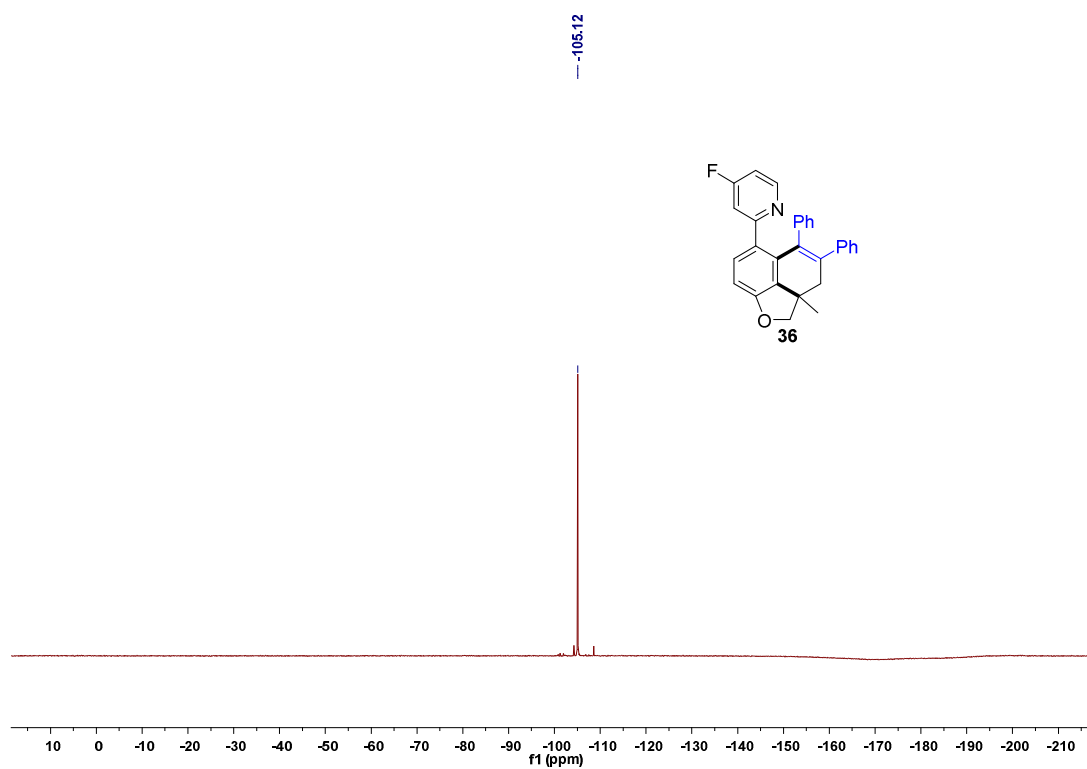

$^1\text{H}$  NMR (600 MHz,  $\text{CDCl}_3$ )

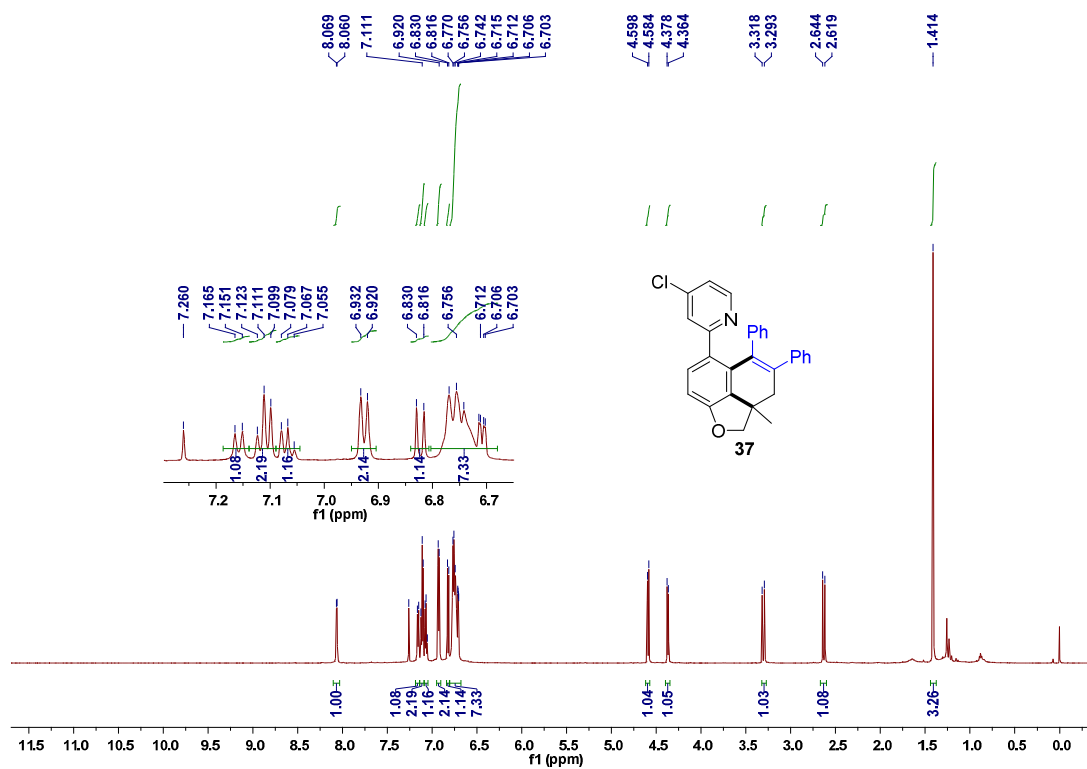

$^{13}\text{C}$  NMR (150 MHz,  $\text{CDCl}_3$ )

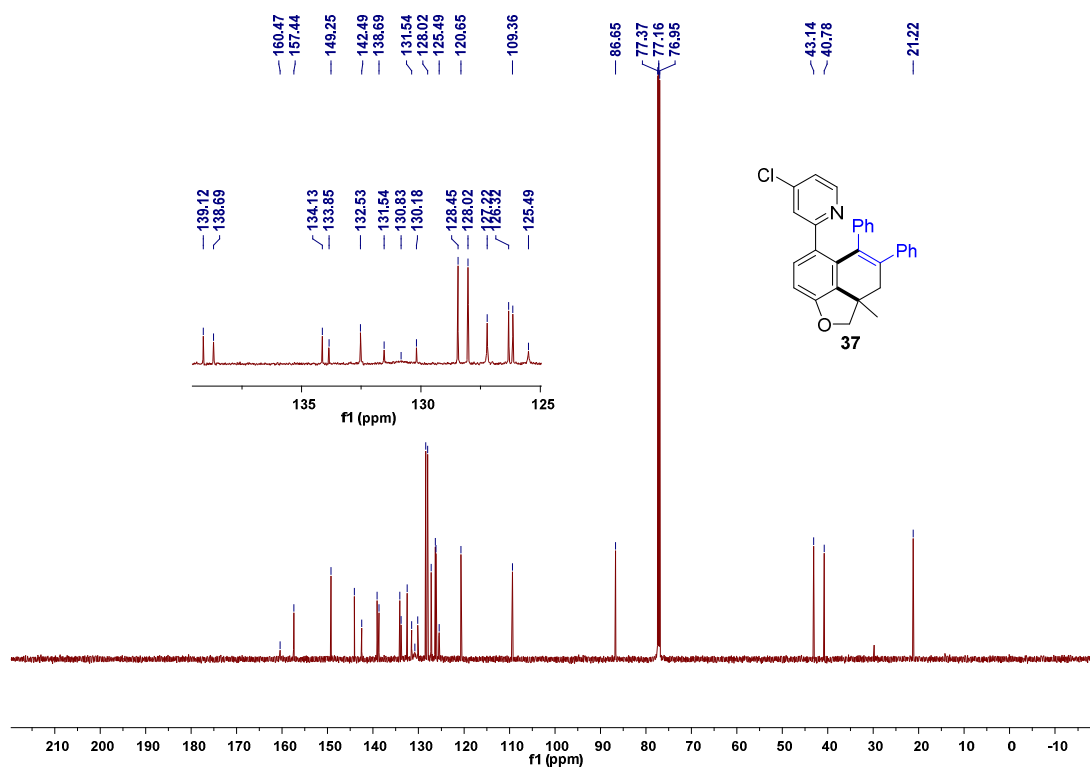

$^1\text{H}$  NMR (600 MHz,  $\text{DMSO}-d_6$ )

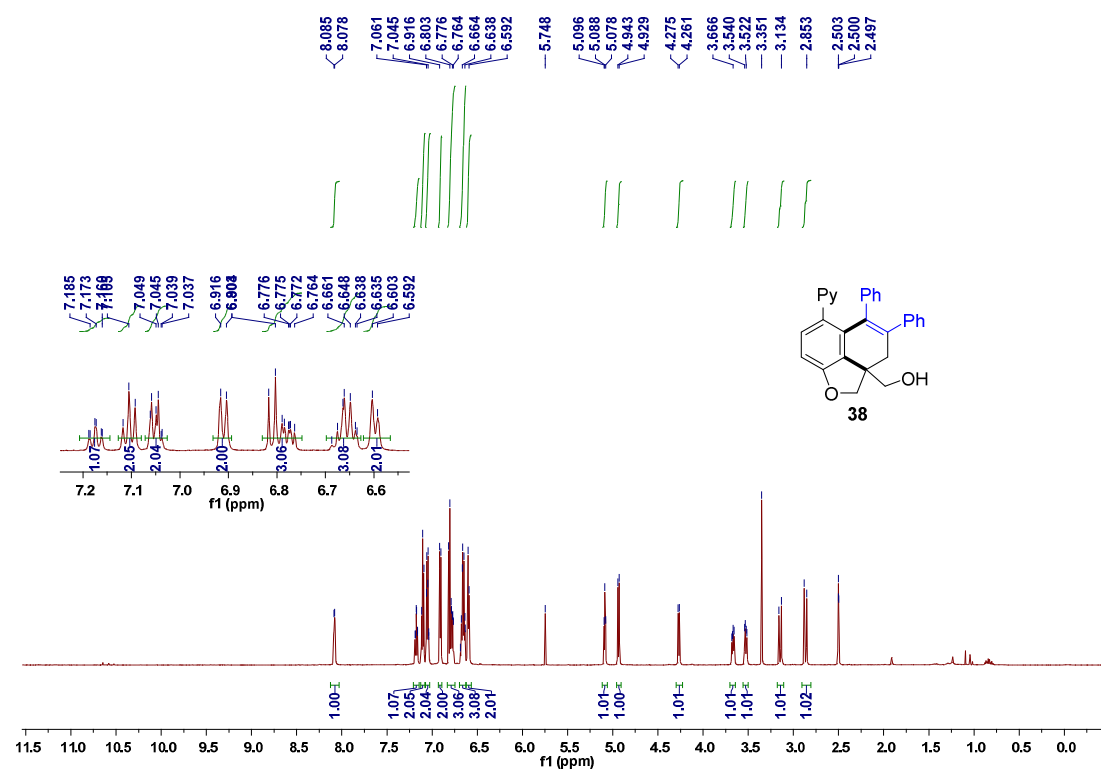

$^{13}\text{C}$  NMR (150 MHz,  $\text{DMSO-}d_6$ )

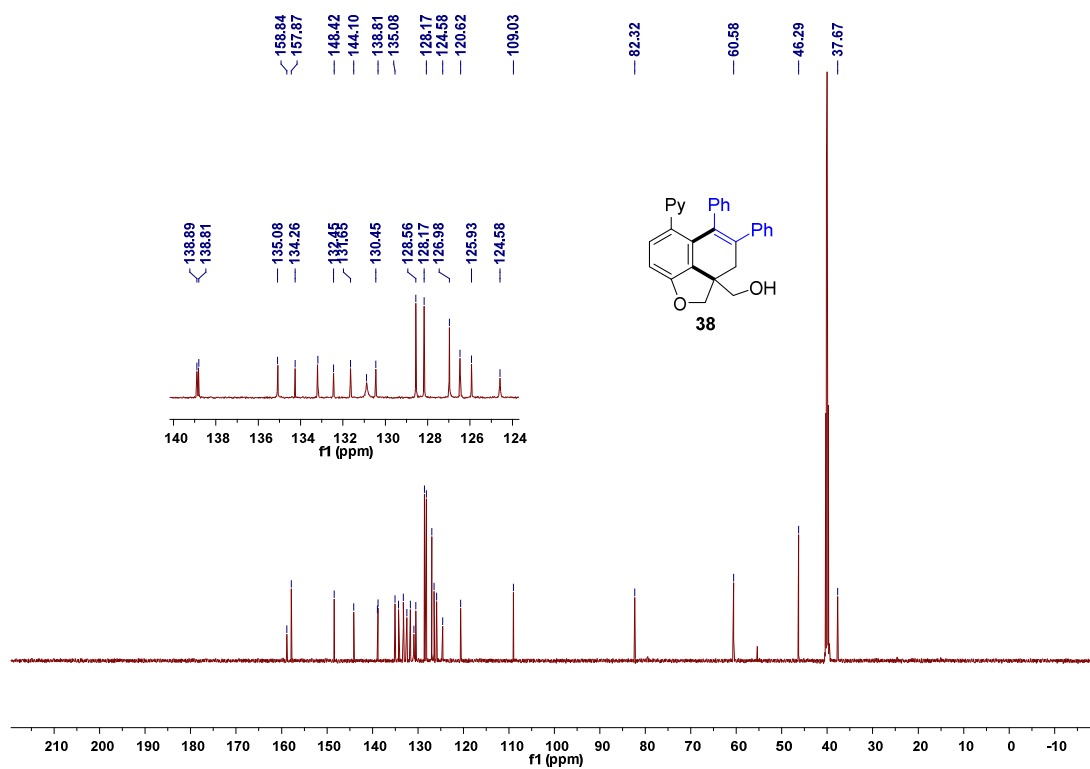

$^1\text{H}$  NMR (400 MHz,  $\text{CDCl}_3$ )

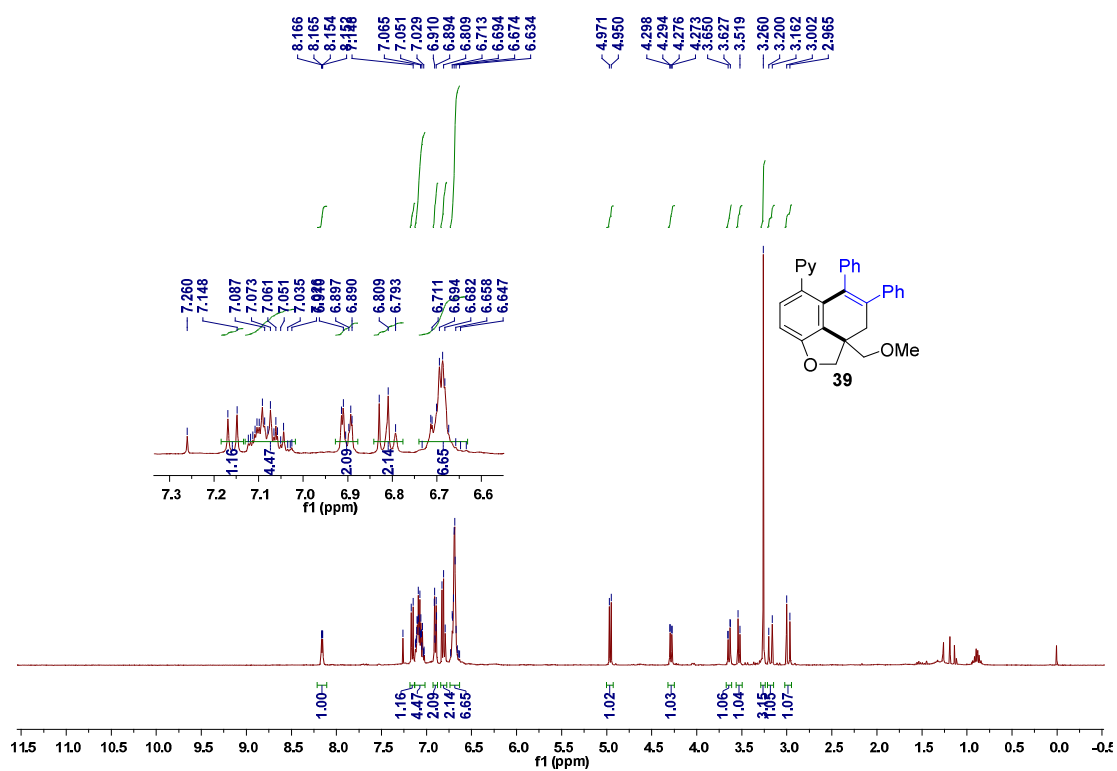

$^{13}\text{C}$  NMR (100 MHz,  $\text{CDCl}_3$ )

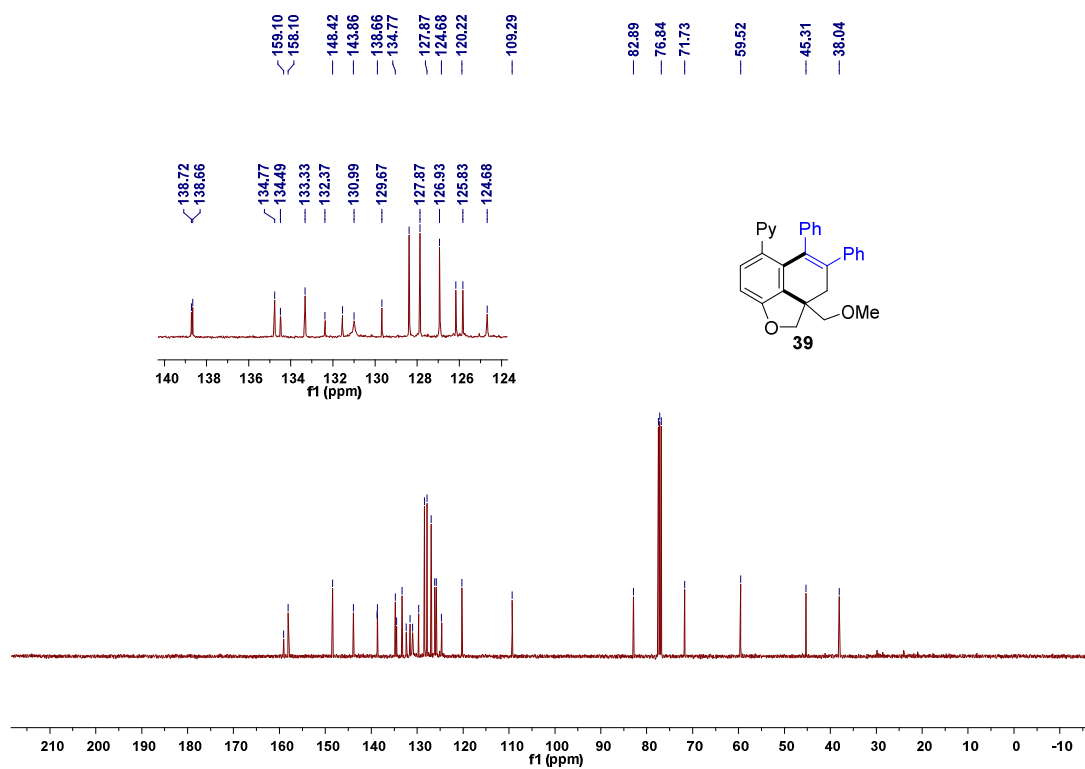

$^1\text{H}$  NMR (400 MHz,  $\text{CDCl}_3$ )

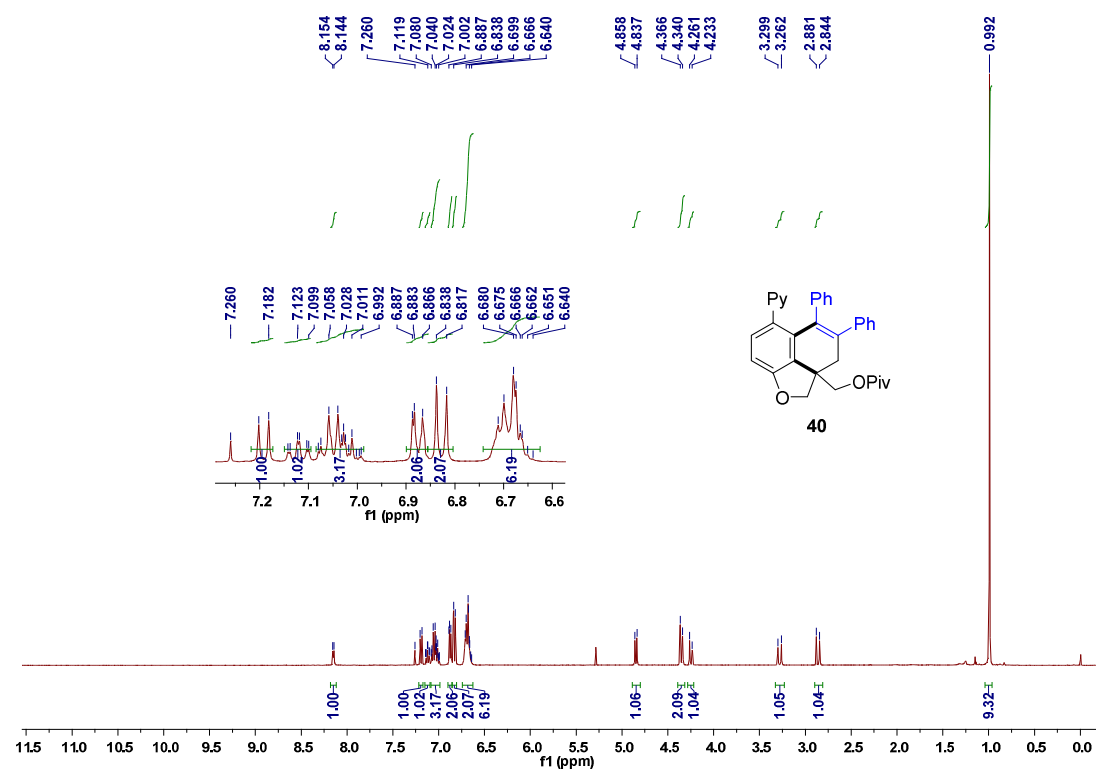

$^{13}\text{C}$  NMR (100 MHz,  $\text{CDCl}_3$ )

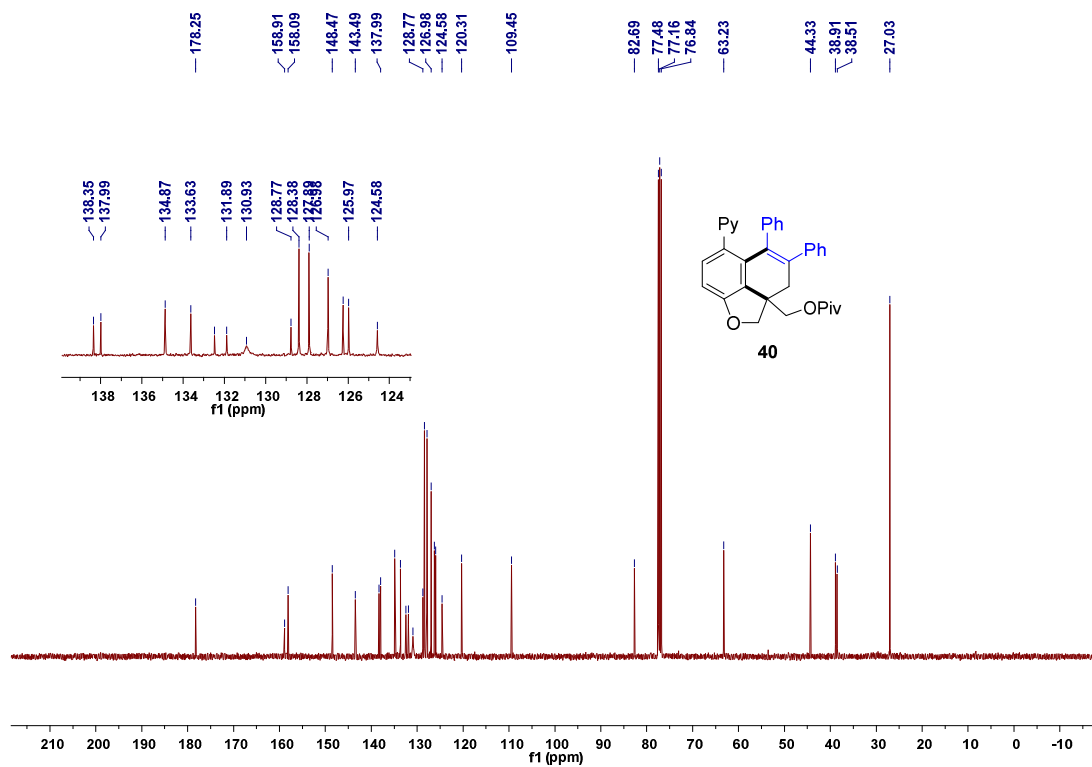

$^1\text{H}$  NMR (600 MHz,  $\text{CDCl}_3$ )

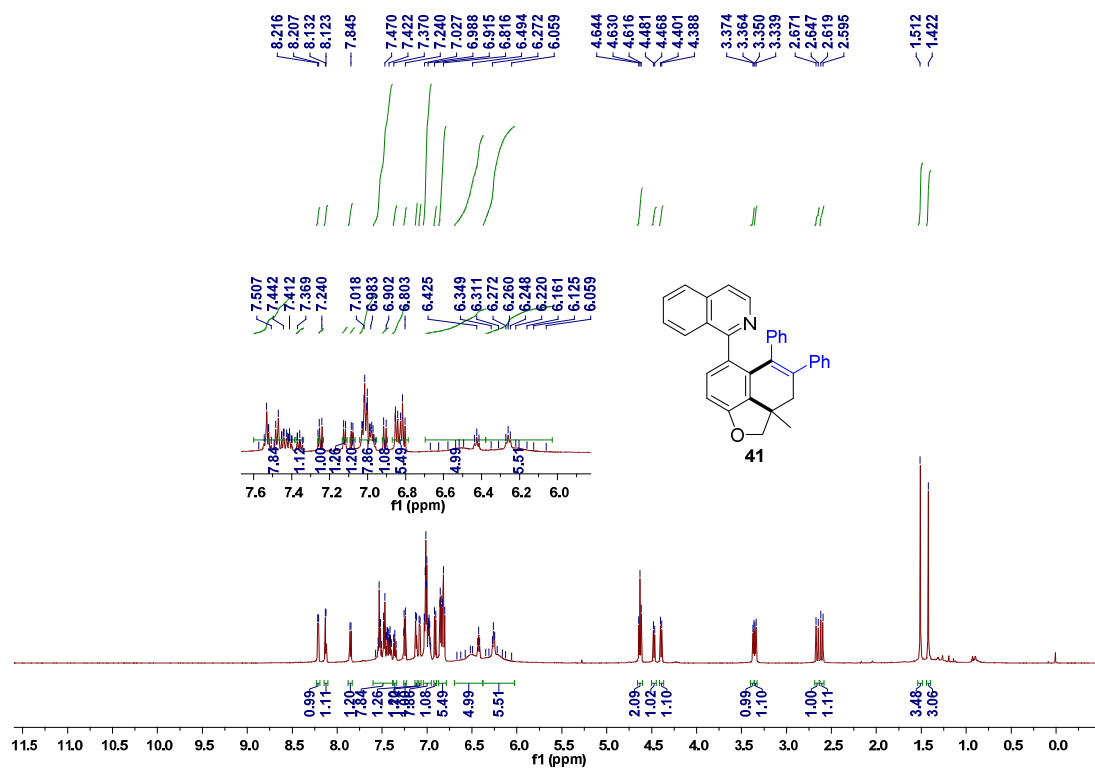

$^{13}\text{C}$  NMR (150 MHz,  $\text{CDCl}_3$ )

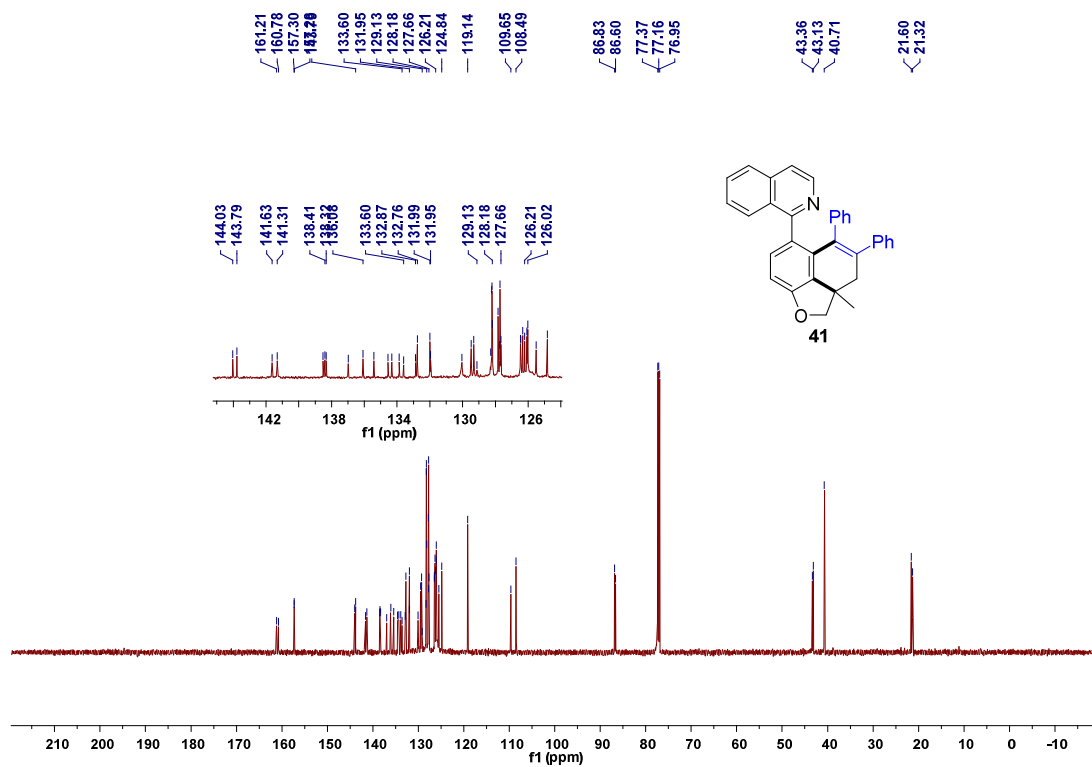

$^1\text{H}$  NMR (600 MHz,  $\text{CDCl}_3$ )

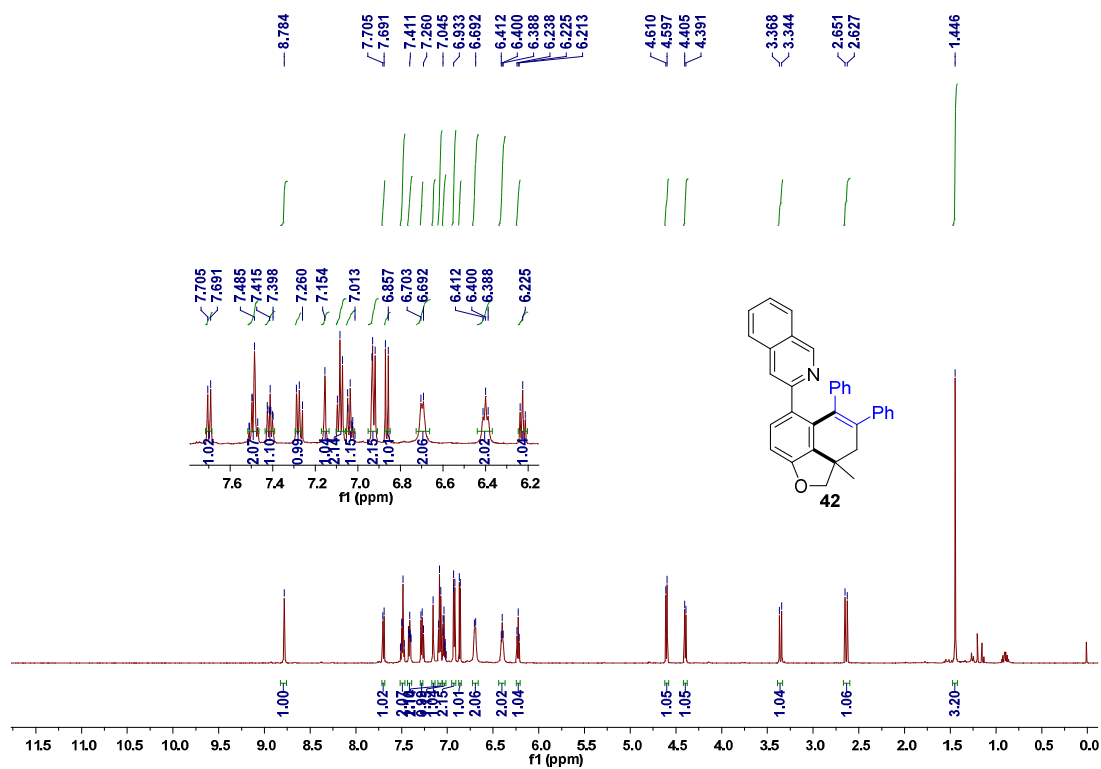

$^{13}\text{C}$  NMR (150 MHz,  $\text{CDCl}_3$ )

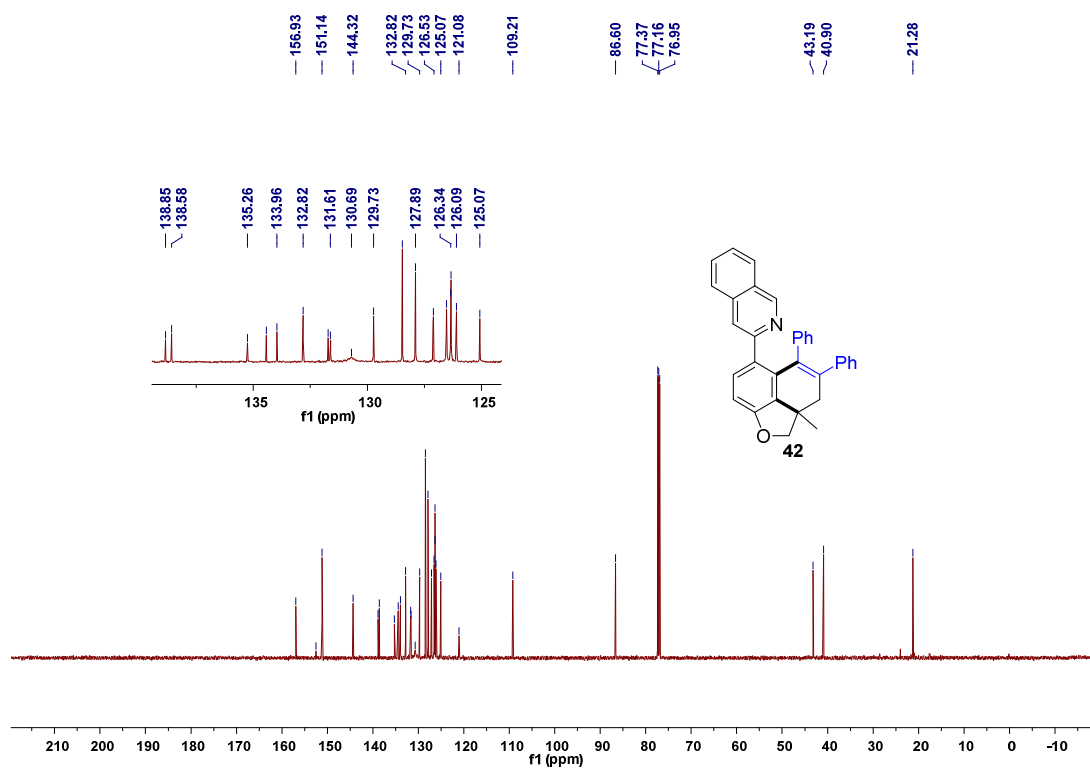

$^1\text{H}$  NMR (600 MHz,  $\text{CDCl}_3$ )

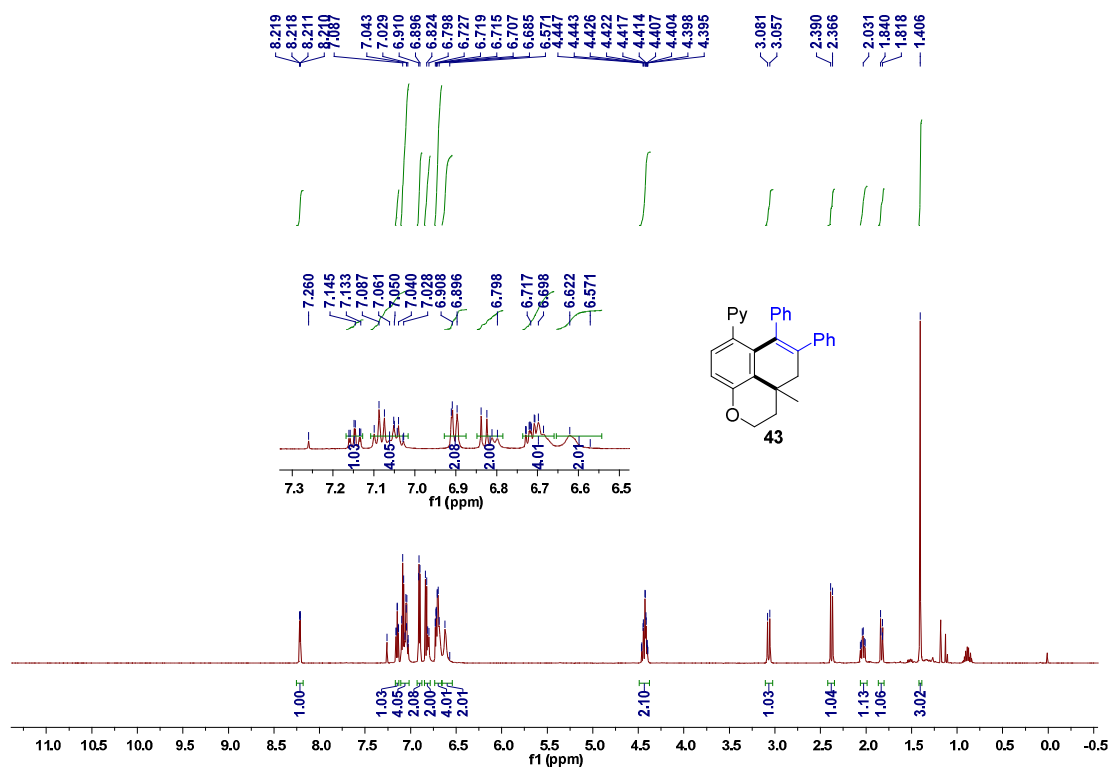

$^{13}\text{C}$  NMR (150 MHz,  $\text{CDCl}_3$ )

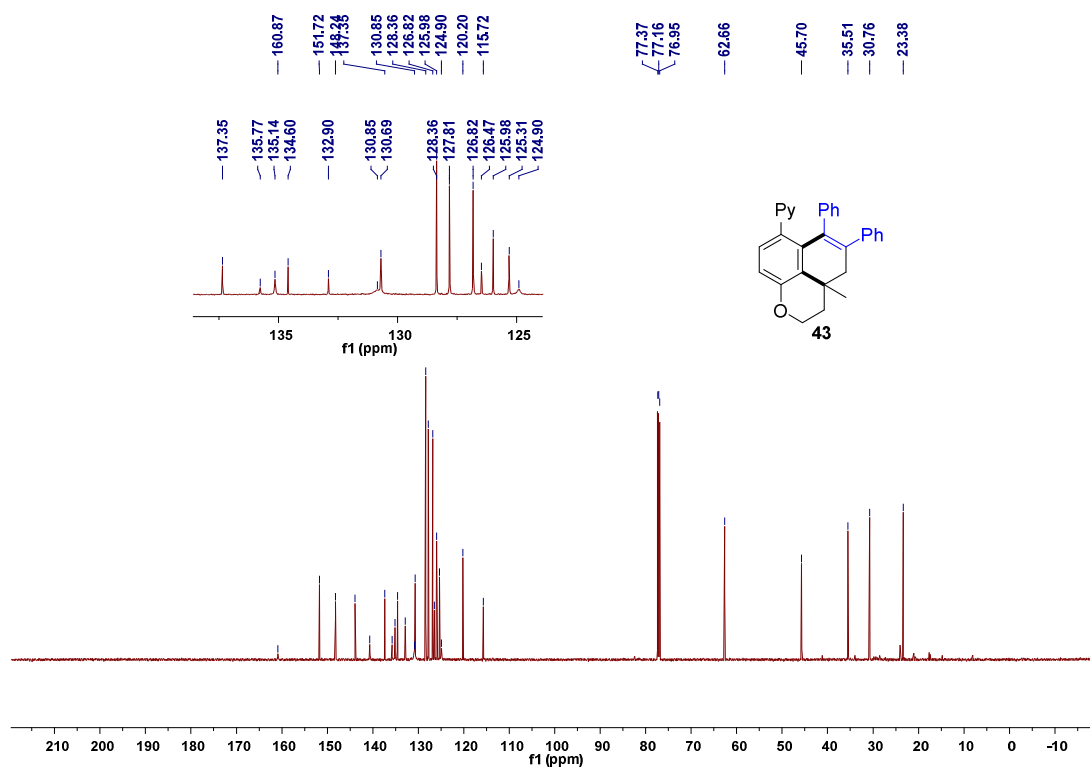

$^1\text{H}$  NMR (600 MHz,  $\text{CDCl}_3$ )

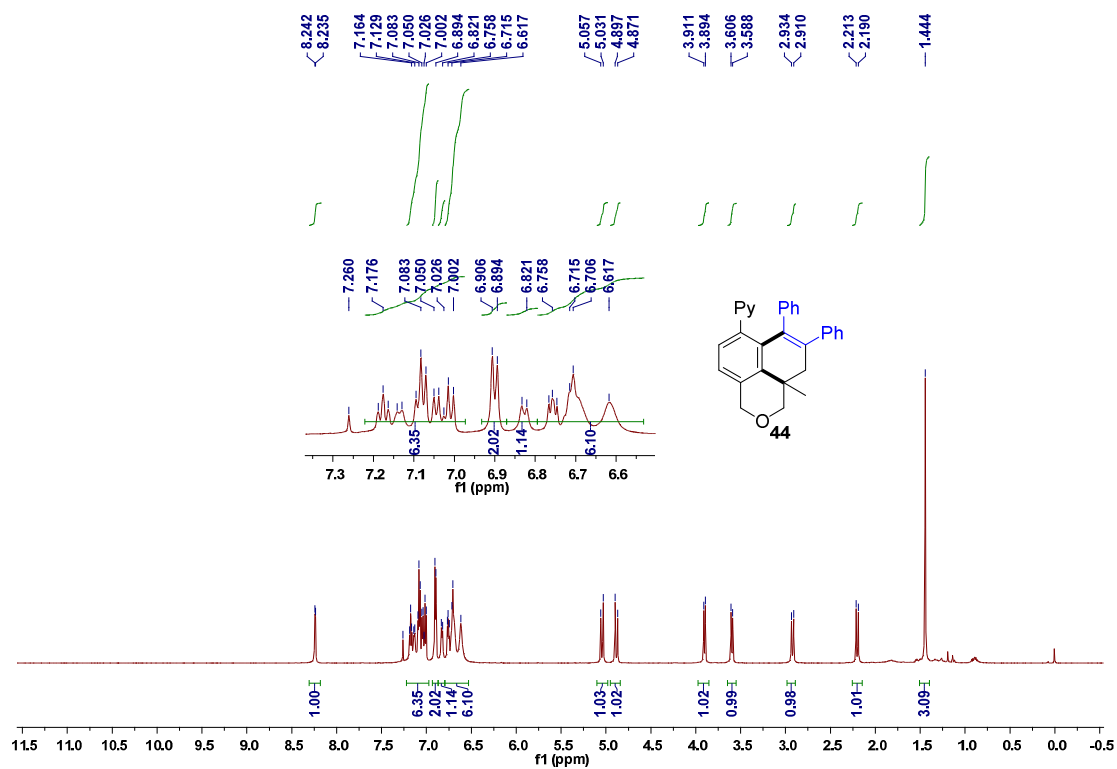



$^{13}\text{C}$  NMR (150 MHz,  $\text{CDCl}_3$ )

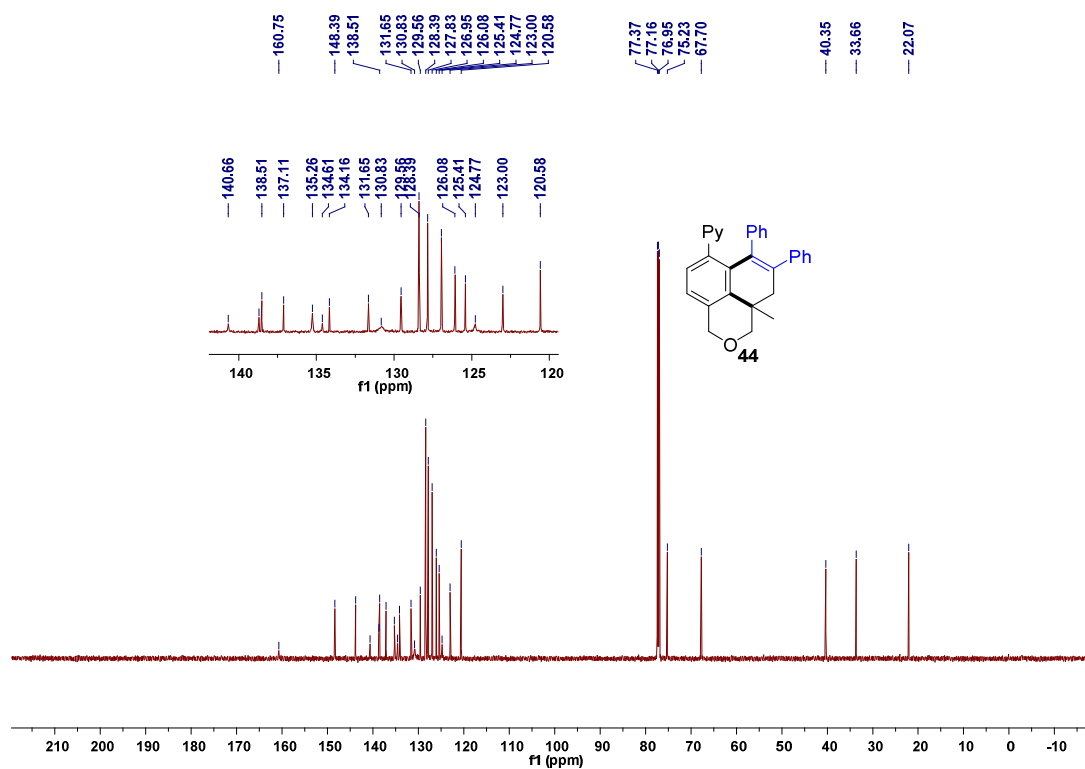

$^1\text{H}$  NMR (600 MHz,  $\text{CDCl}_3$ )

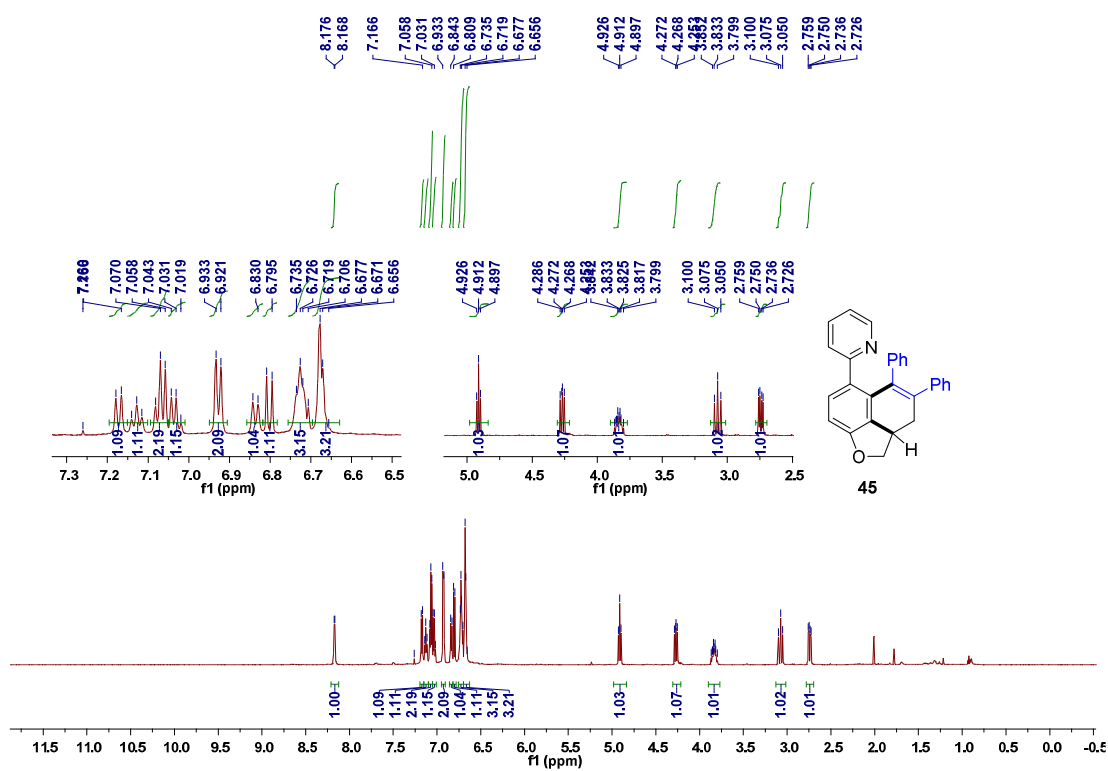

$^{13}\text{C}$  NMR (150 MHz,  $\text{CDCl}_3$ )

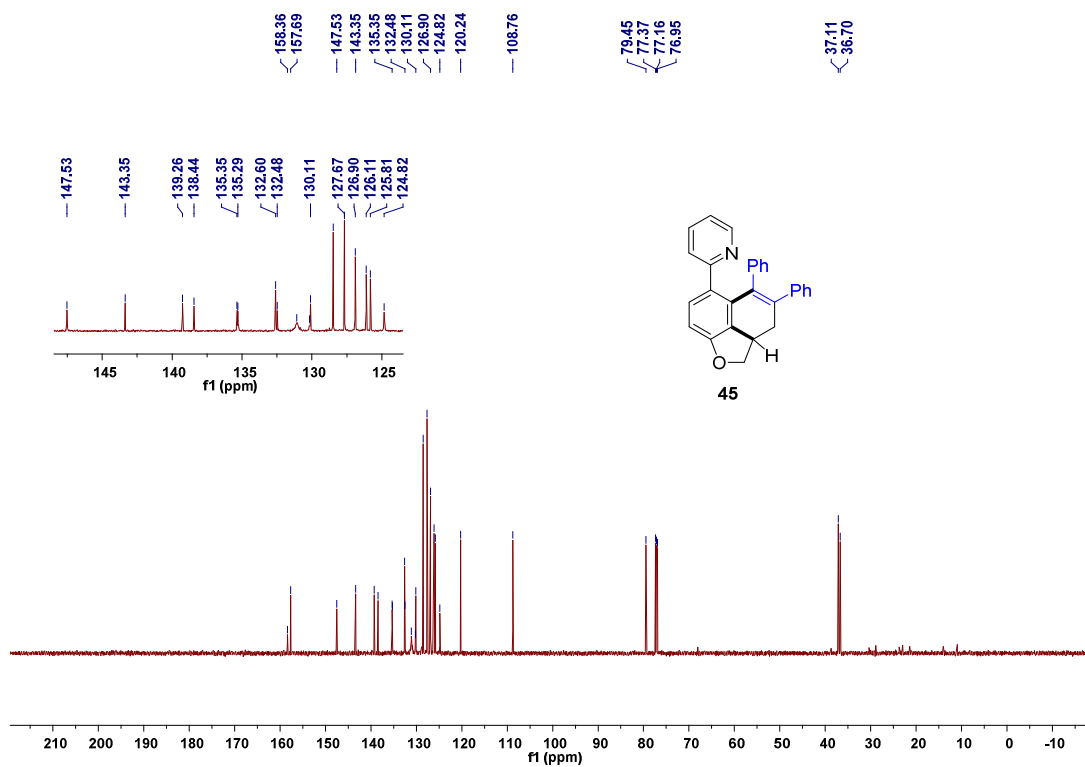

$^1\text{H}$  NMR (400 MHz,  $\text{CDCl}_3$ )

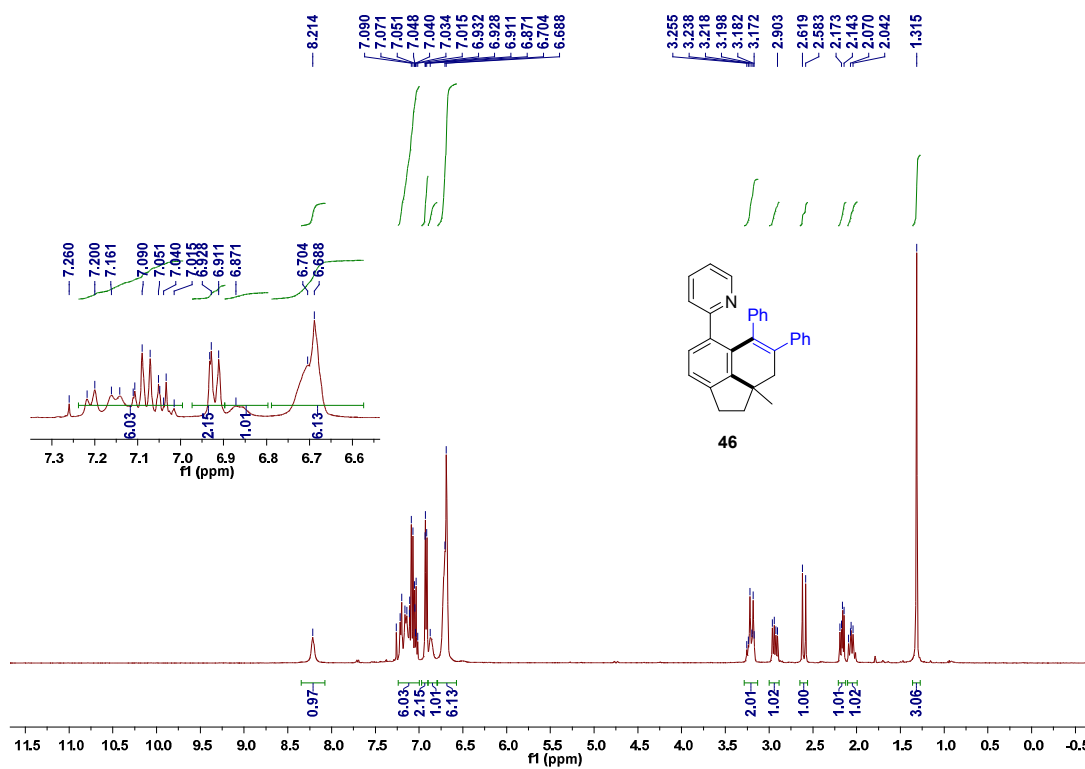

$^{13}\text{C}$  NMR (100 MHz,  $\text{CDCl}_3$ )

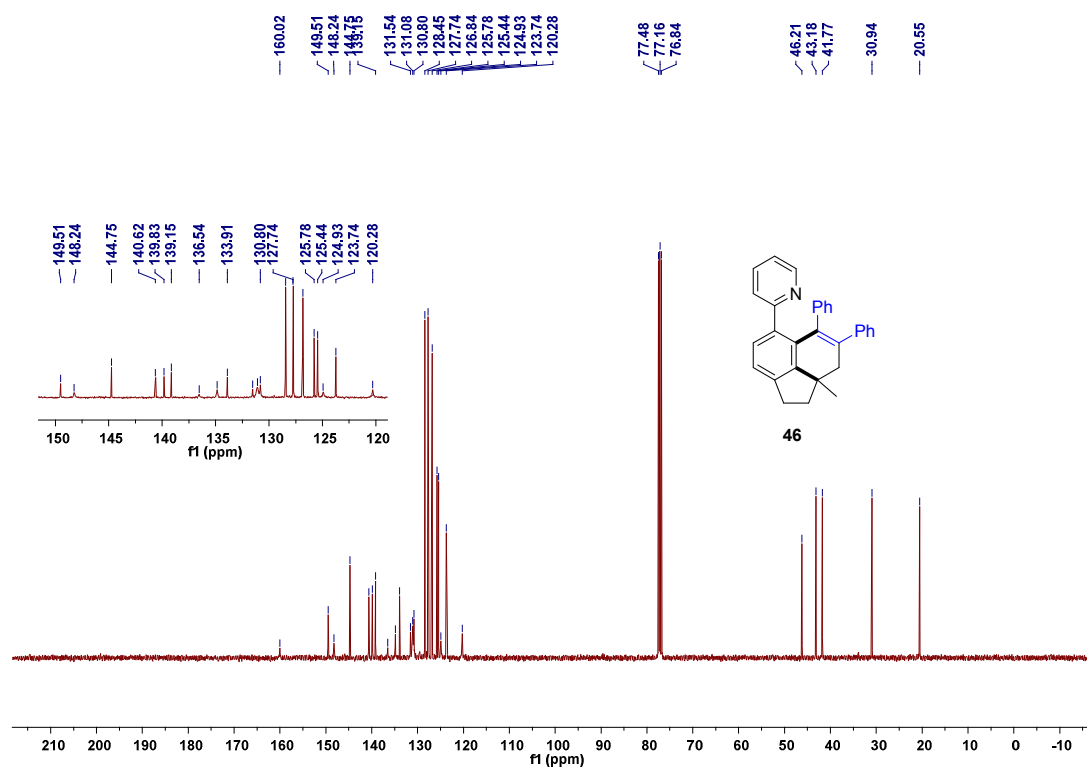

$^1\text{H}$  NMR (600 MHz,  $\text{CDCl}_3$ )

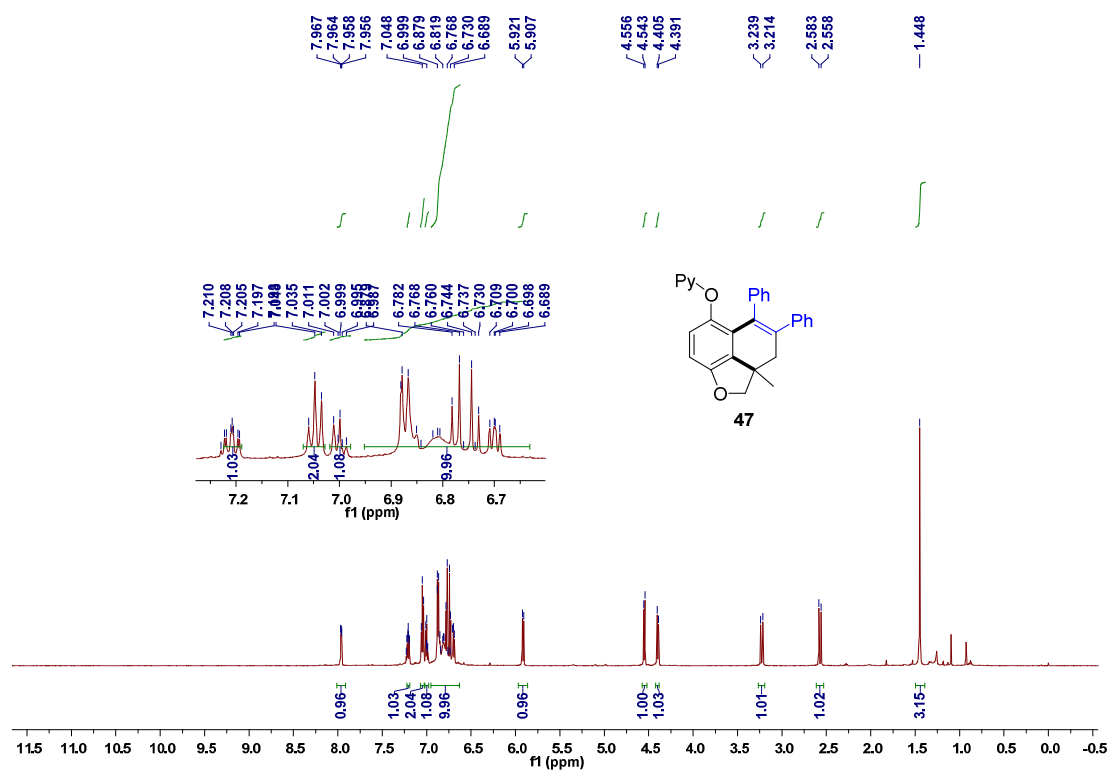

$^{13}\text{C}$  NMR (150 MHz,  $\text{CDCl}_3$ )

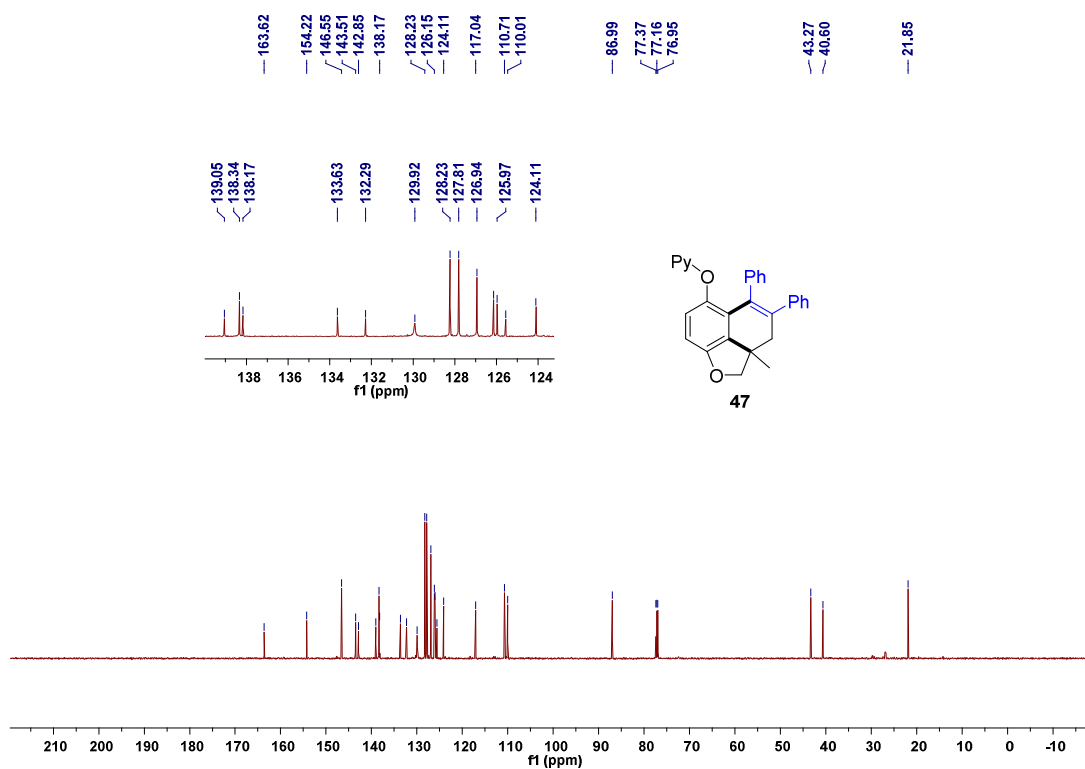

$^1\text{H}$  NMR (400 MHz,  $\text{CDCl}_3$ )

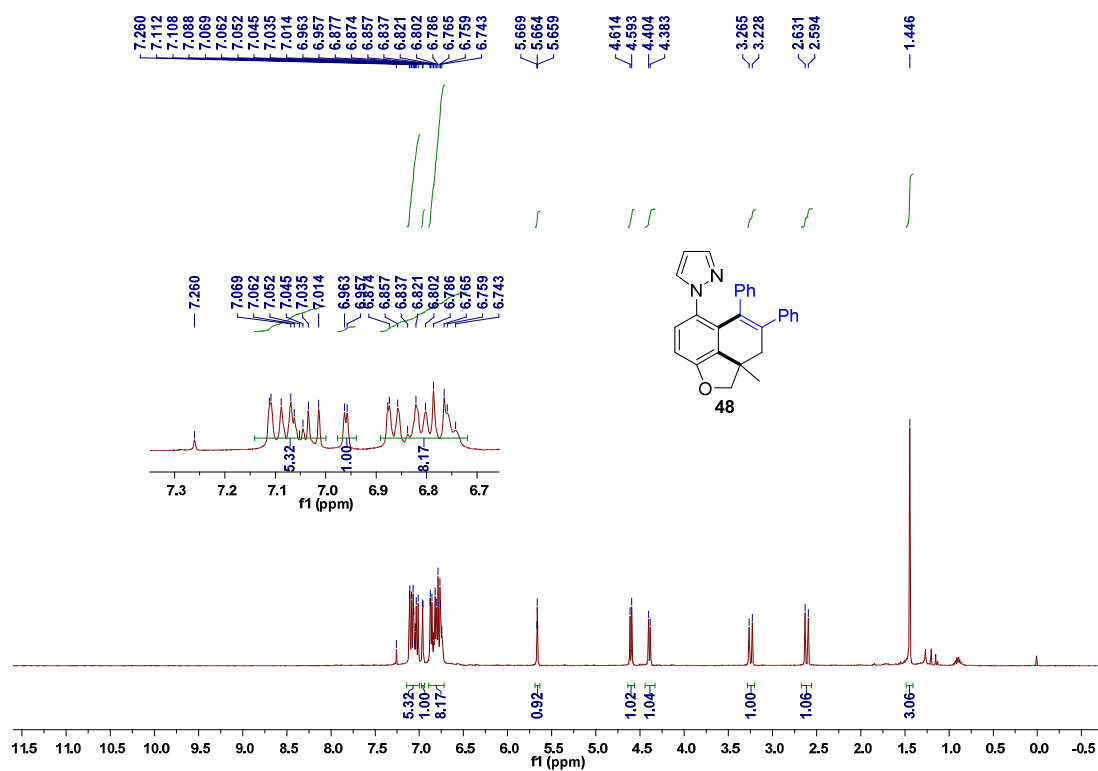

$^{13}\text{C}$  NMR (100 MHz,  $\text{CDCl}_3$ )

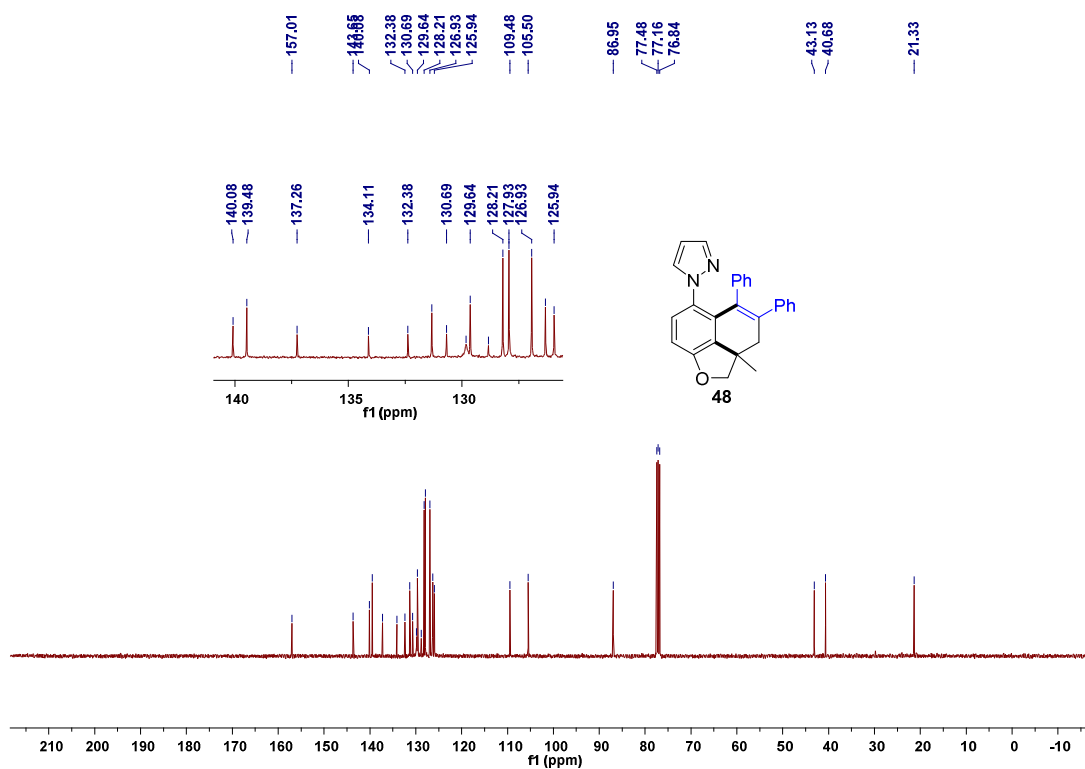

$^1\text{H}$  NMR (600 MHz,  $\text{CDCl}_3$ )

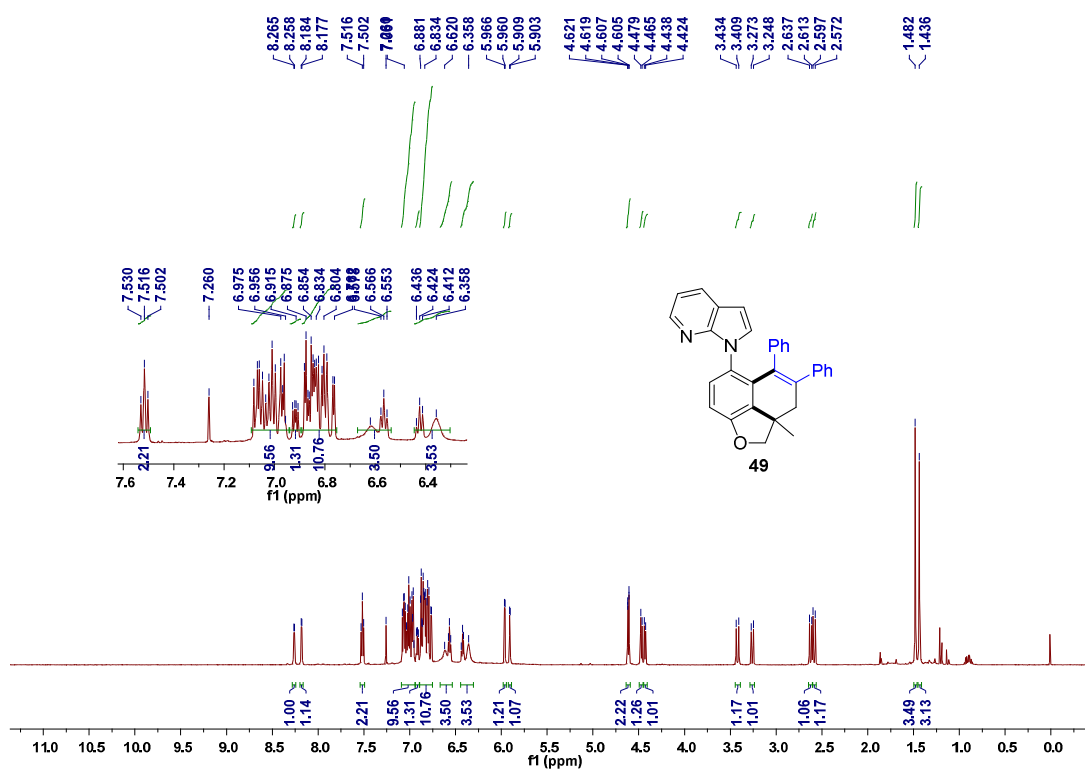

$^{13}\text{C}$  NMR (150 MHz,  $\text{CDCl}_3$ )

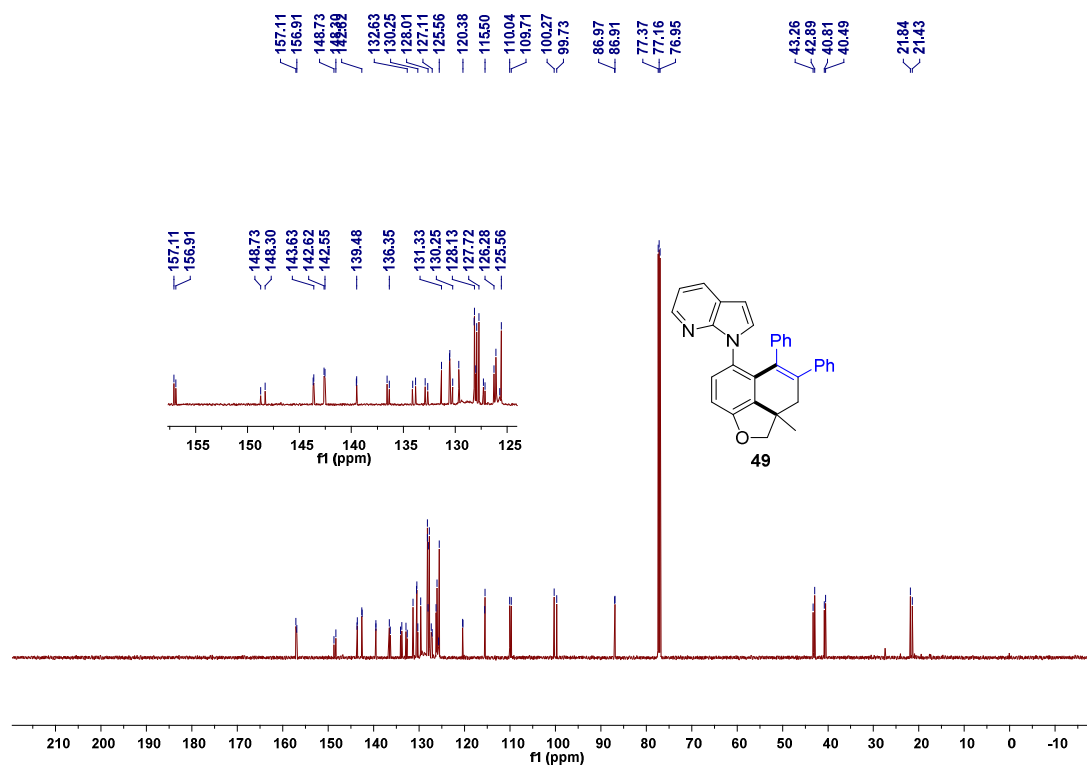

$^1\text{H}$  NMR (400 MHz,  $\text{CDCl}_3$ )

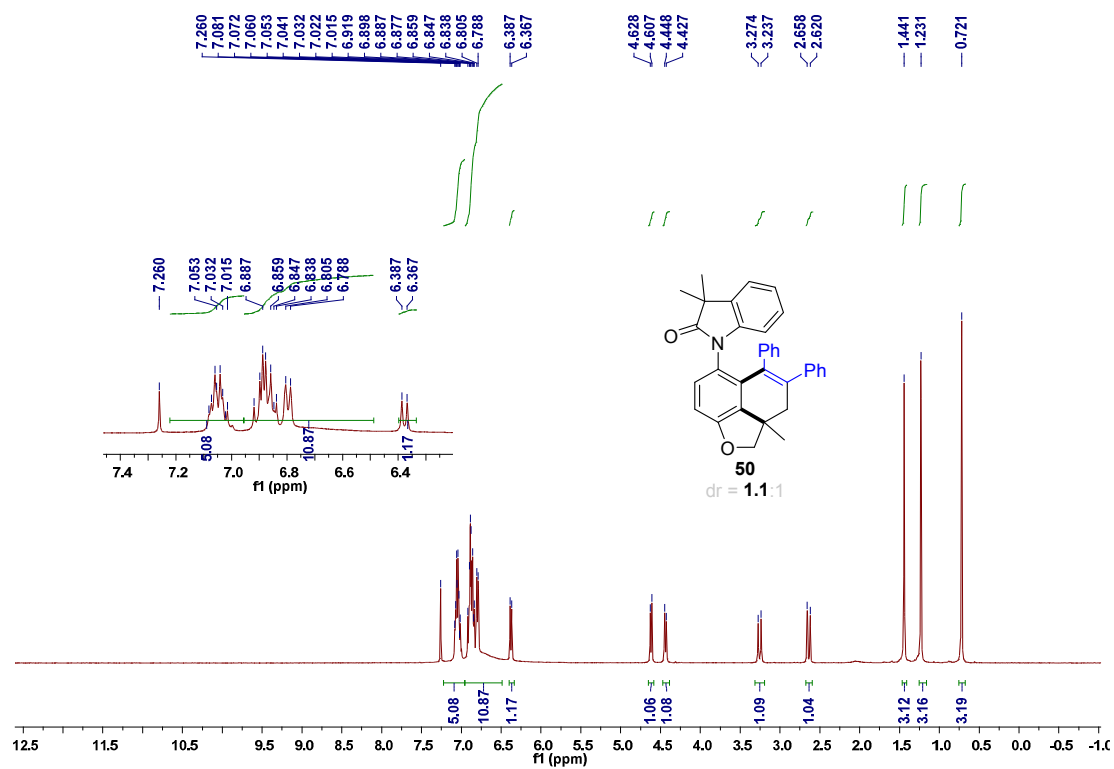

$^{13}\text{C}$  NMR (150 MHz,  $\text{CDCl}_3$ )

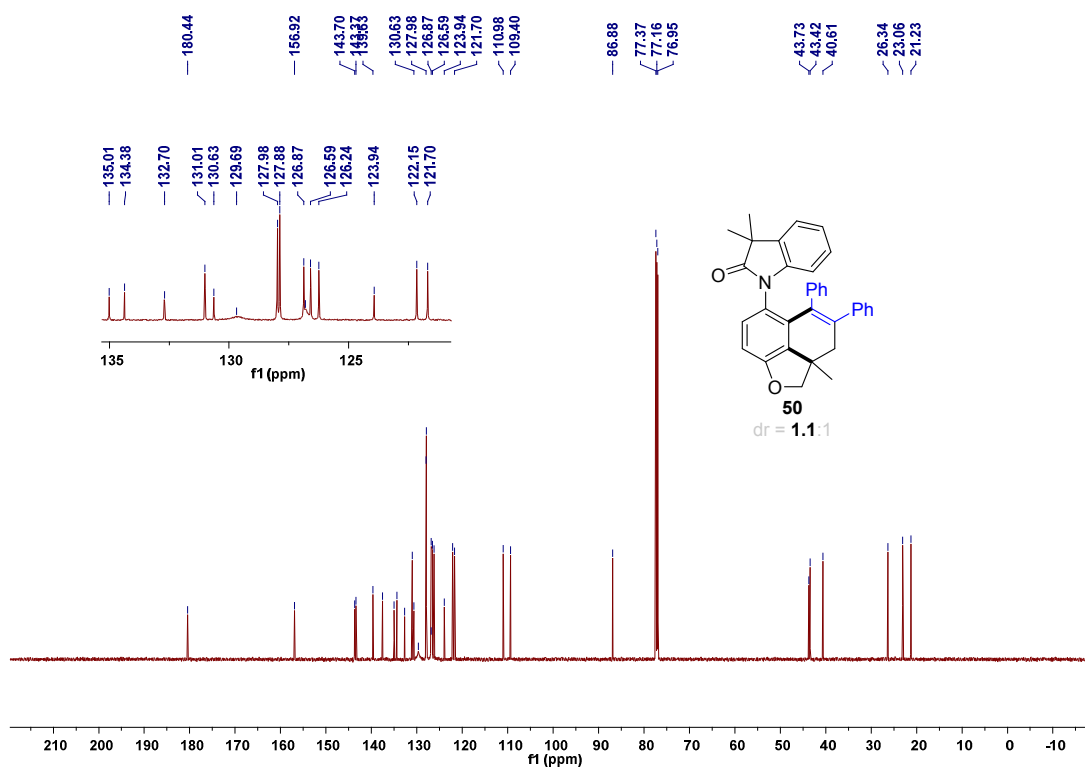

$^1\text{H}$  NMR (600 MHz,  $\text{CDCl}_3$ )

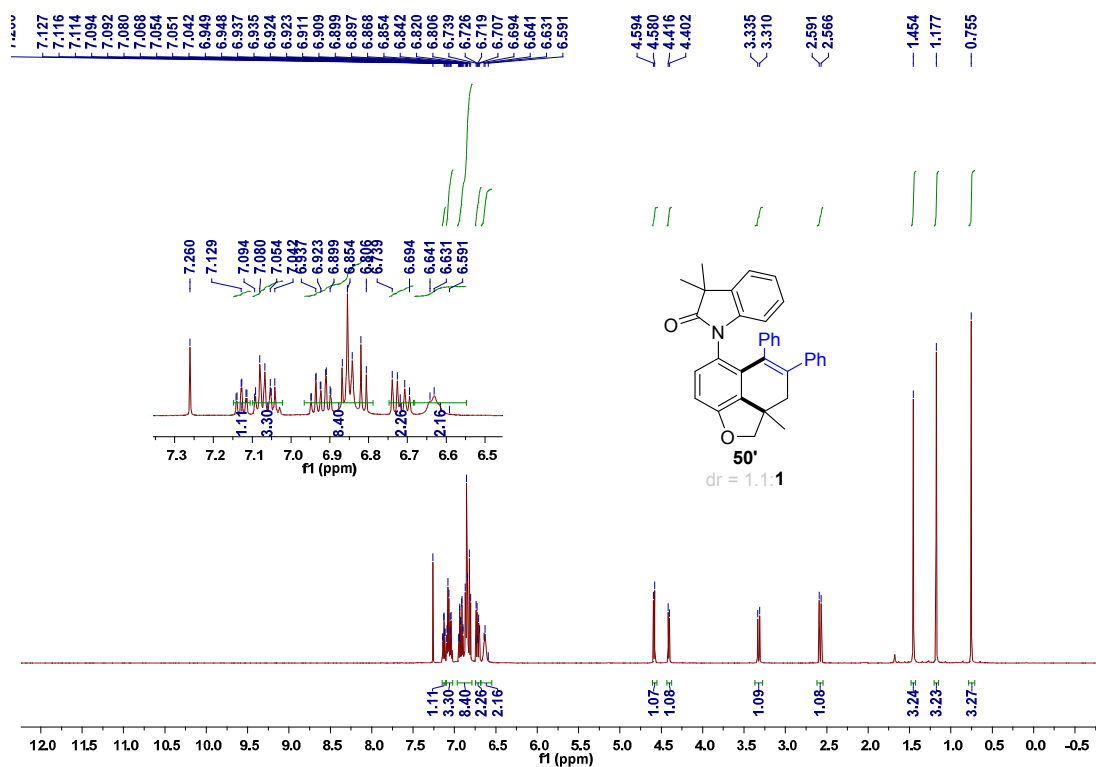

$^{13}\text{C}$  NMR (150 MHz,  $\text{CDCl}_3$ )

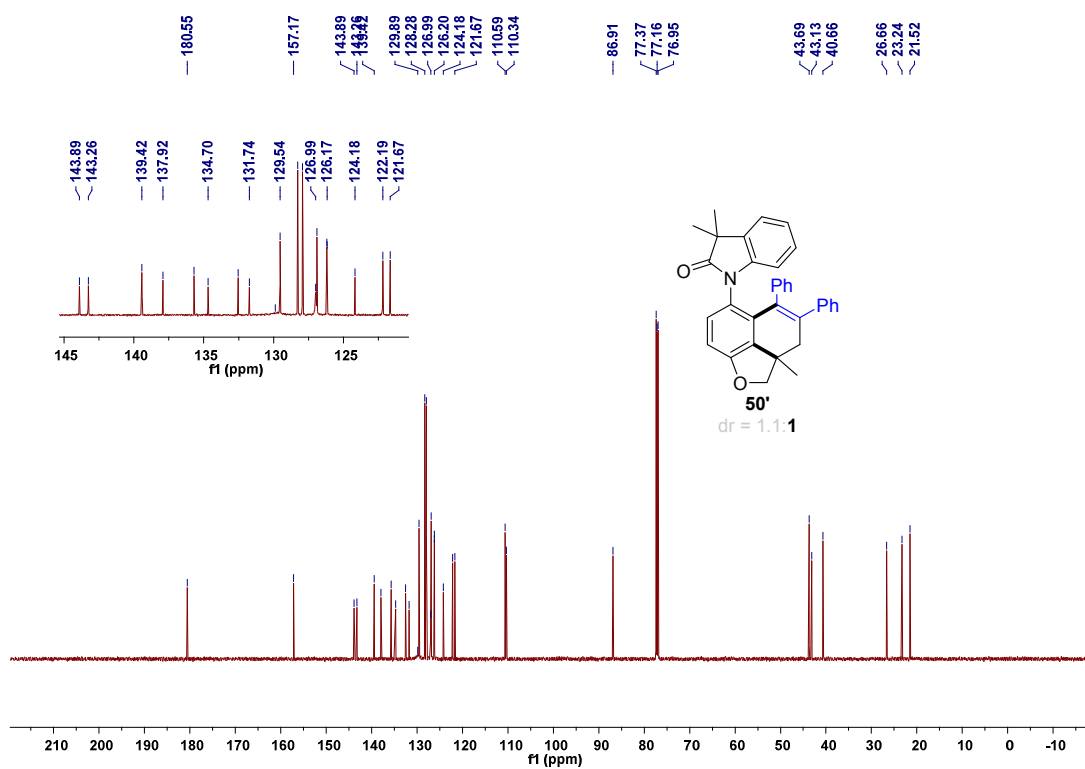

$^1\text{H}$  NMR (600 MHz,  $\text{CDCl}_3$ )

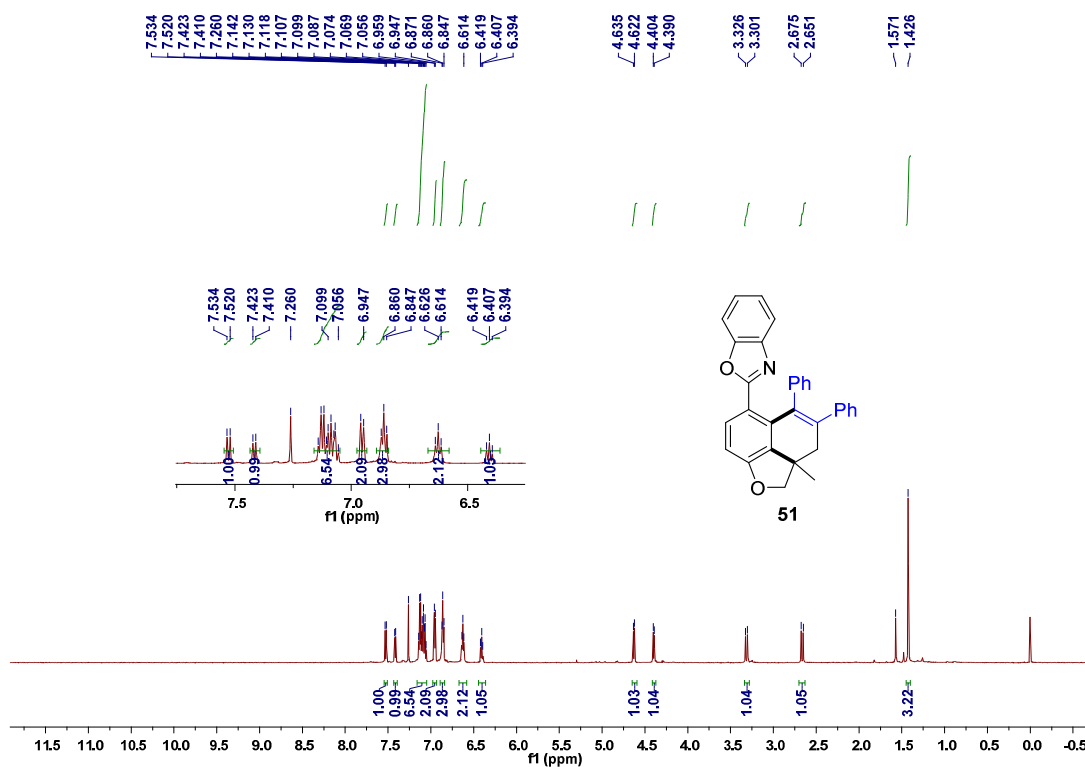



$^{13}\text{C}$  NMR (150 MHz,  $\text{CDCl}_3$ )

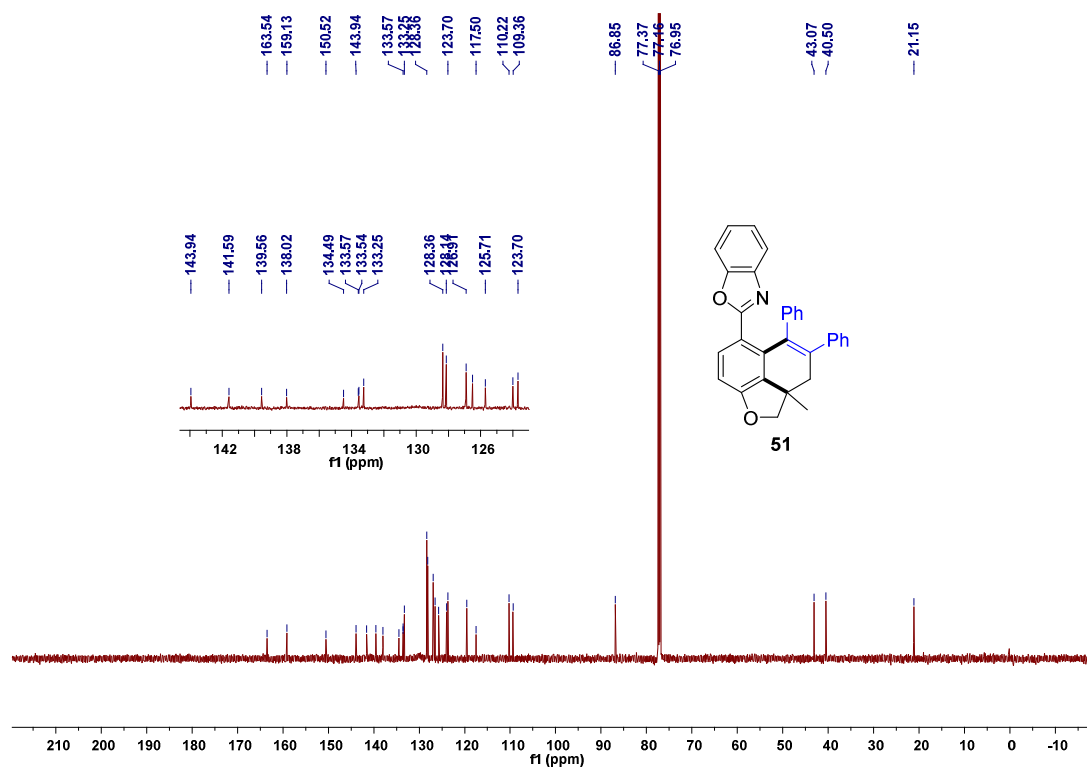

$^1\text{H}$  NMR (600 MHz,  $\text{CDCl}_3$ )

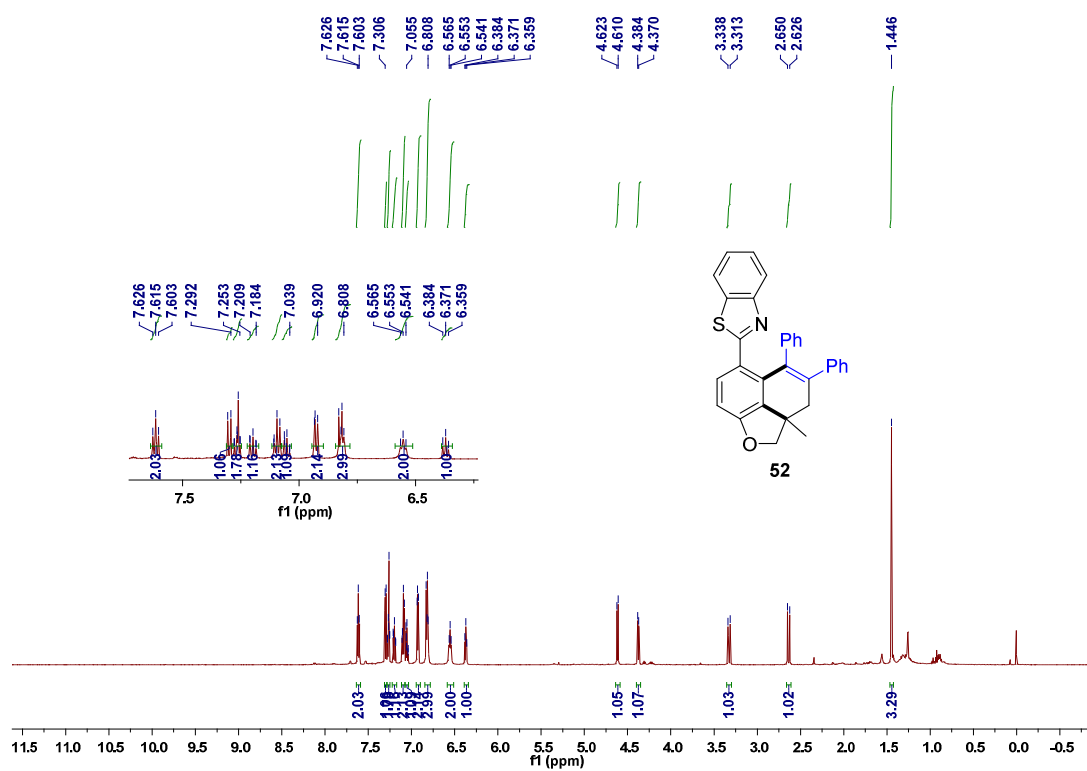

$^{13}\text{C}$  NMR (150 MHz,  $\text{CDCl}_3$ )

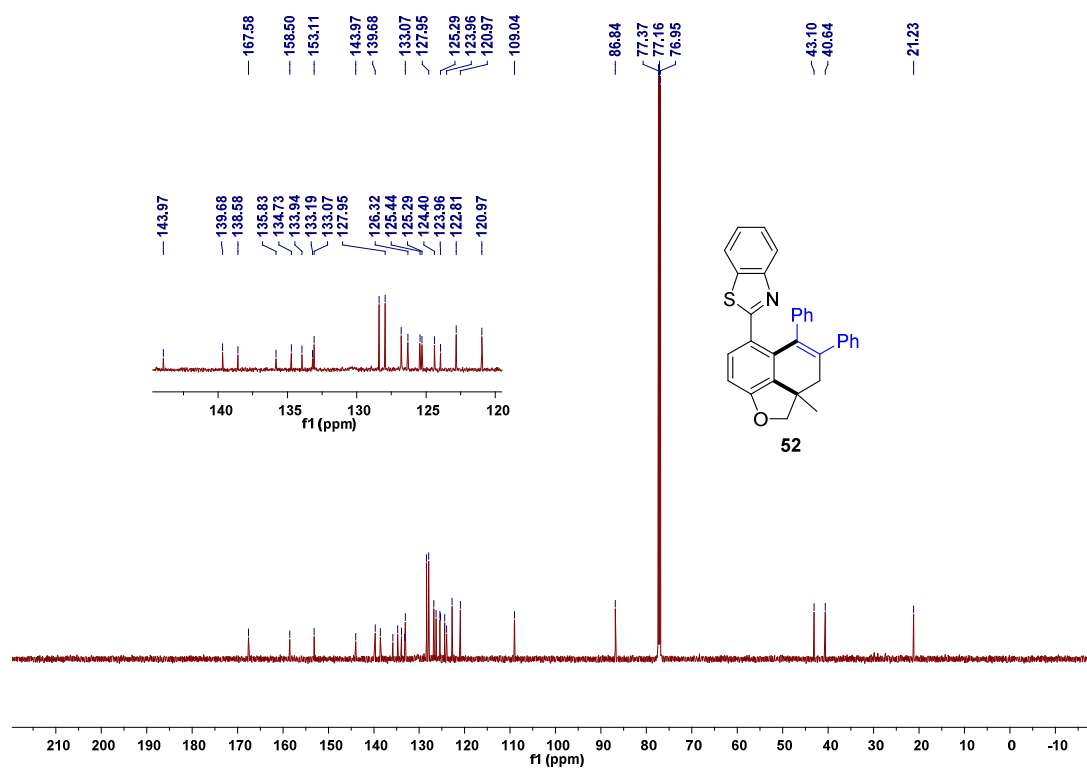

$^1\text{H}$  NMR (600 MHz,  $\text{CDCl}_3$ )

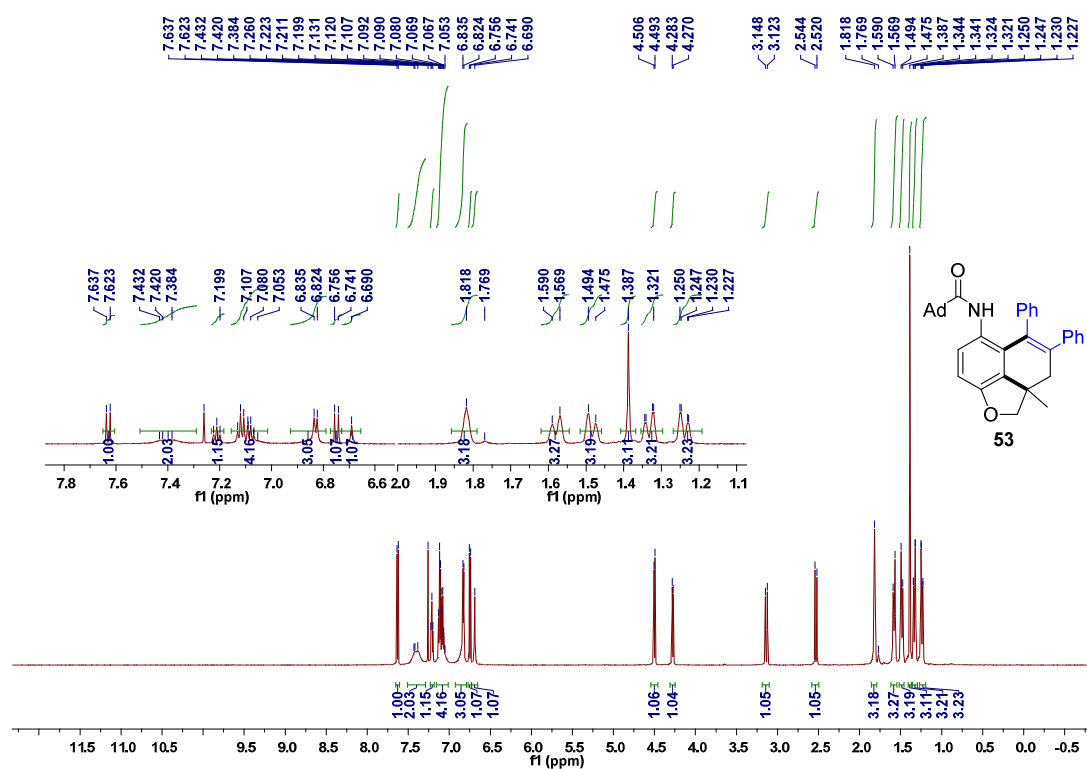

$^{13}\text{C}$  NMR (150 MHz,  $\text{CDCl}_3$ )

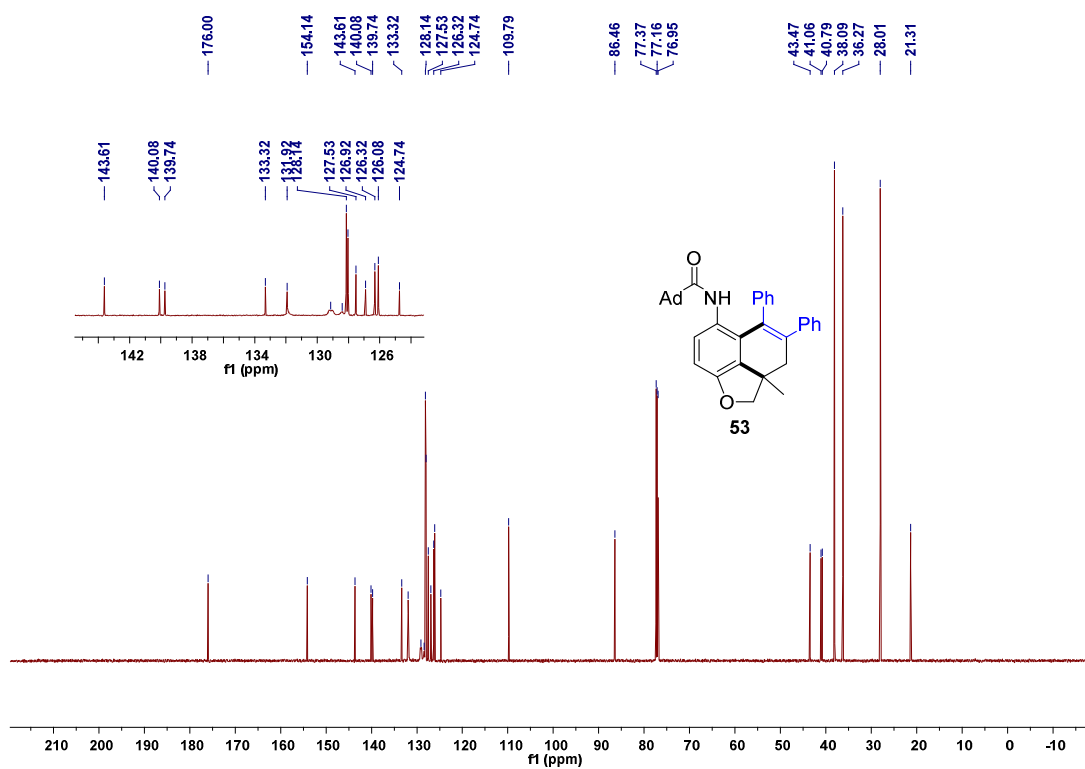

$^1\text{H}$  NMR (600 MHz,  $\text{CDCl}_3$ )

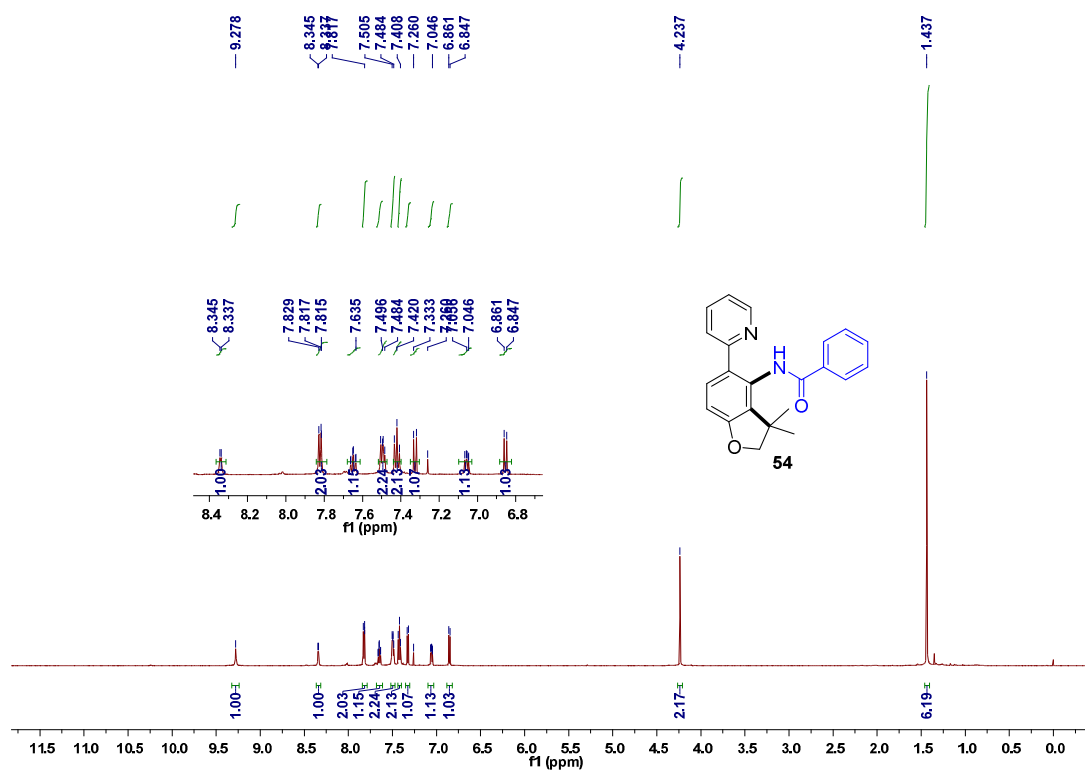

$^{13}\text{C}$  NMR (150 MHz,  $\text{CDCl}_3$ )

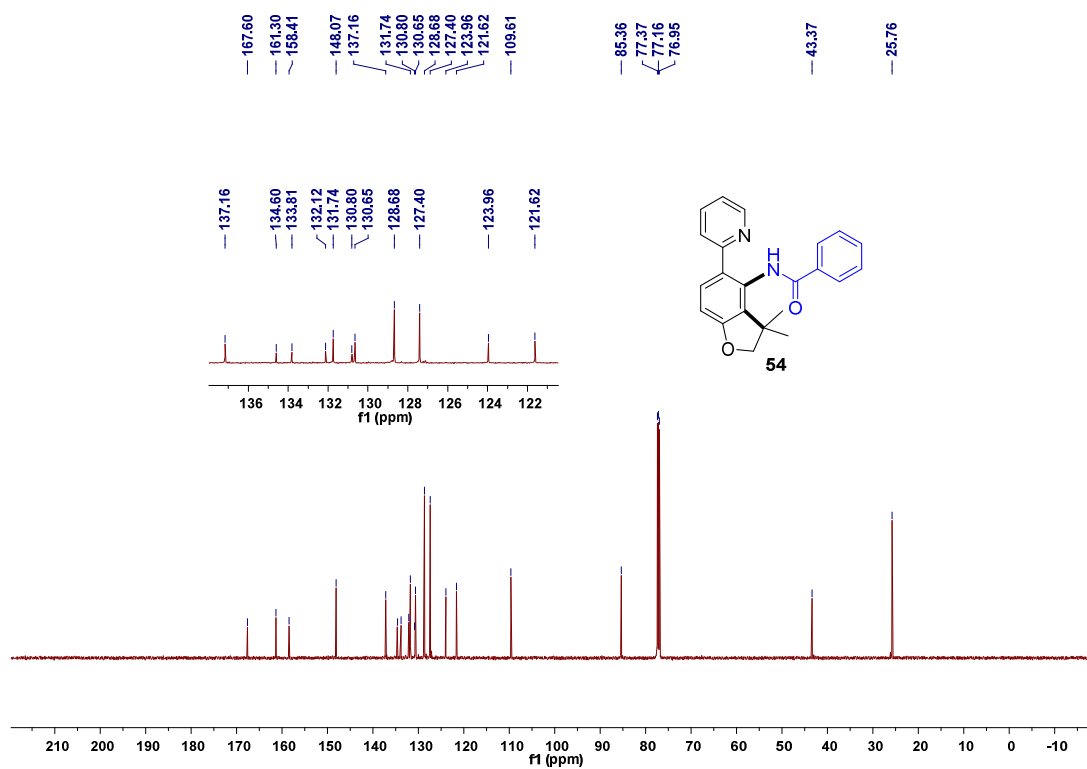

$^1\text{H}$  NMR (400 MHz,  $\text{CDCl}_3$ )

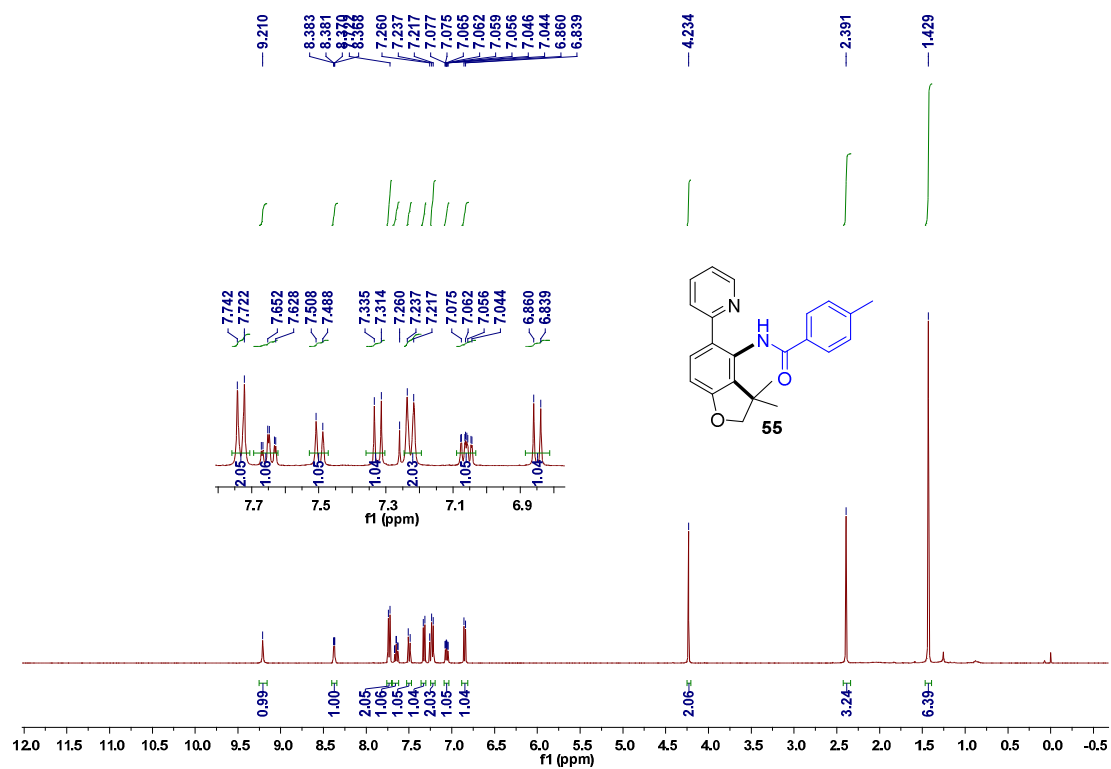

$^{13}\text{C}$  NMR (100 MHz,  $\text{CDCl}_3$ )

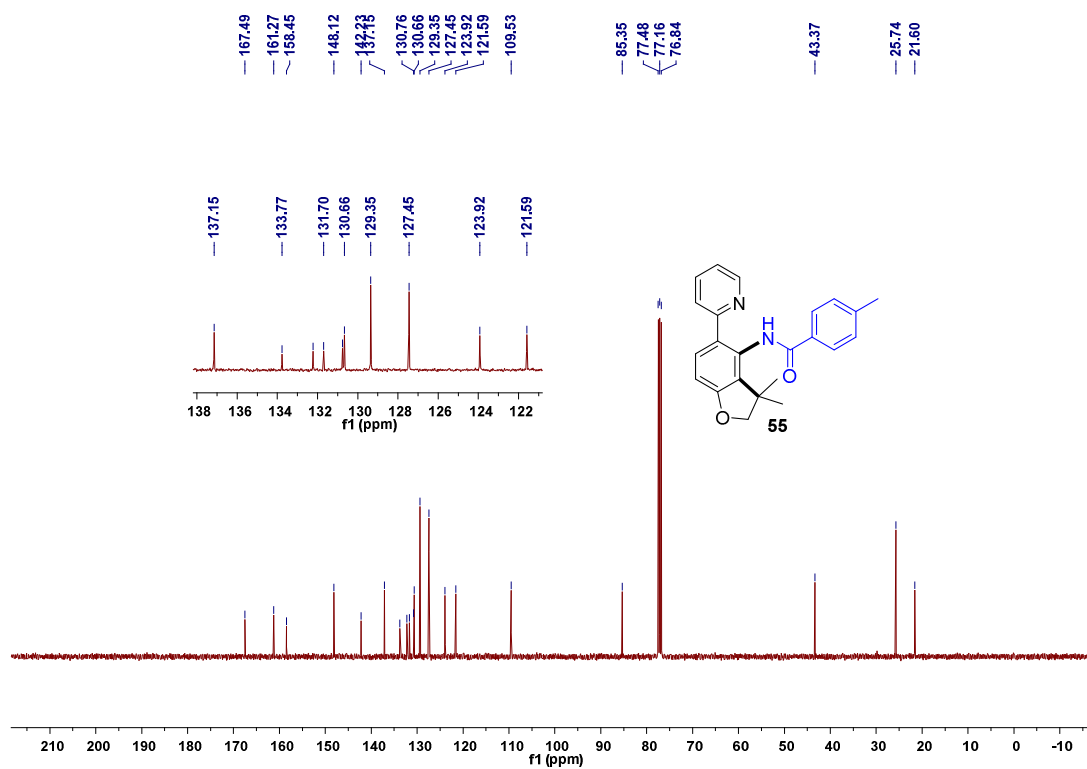

$^1\text{H}$  NMR (600 MHz,  $\text{CDCl}_3$ )

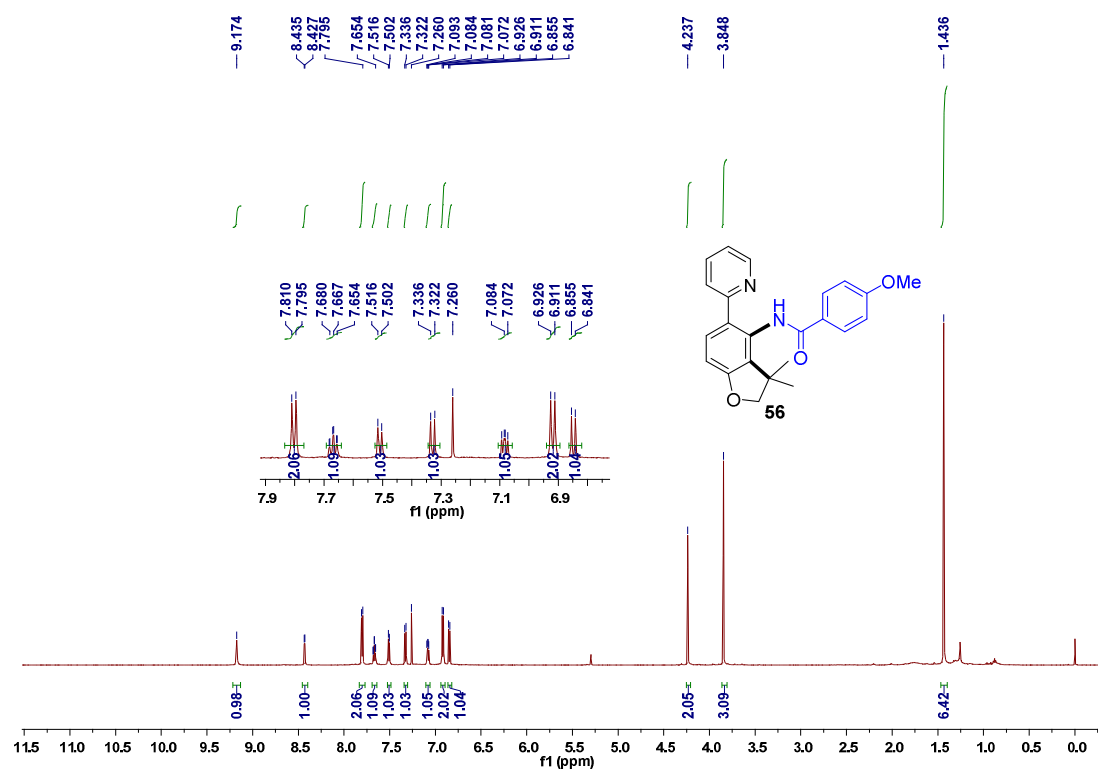

$^{13}\text{C}$  NMR (150 MHz,  $\text{CDCl}_3$ )

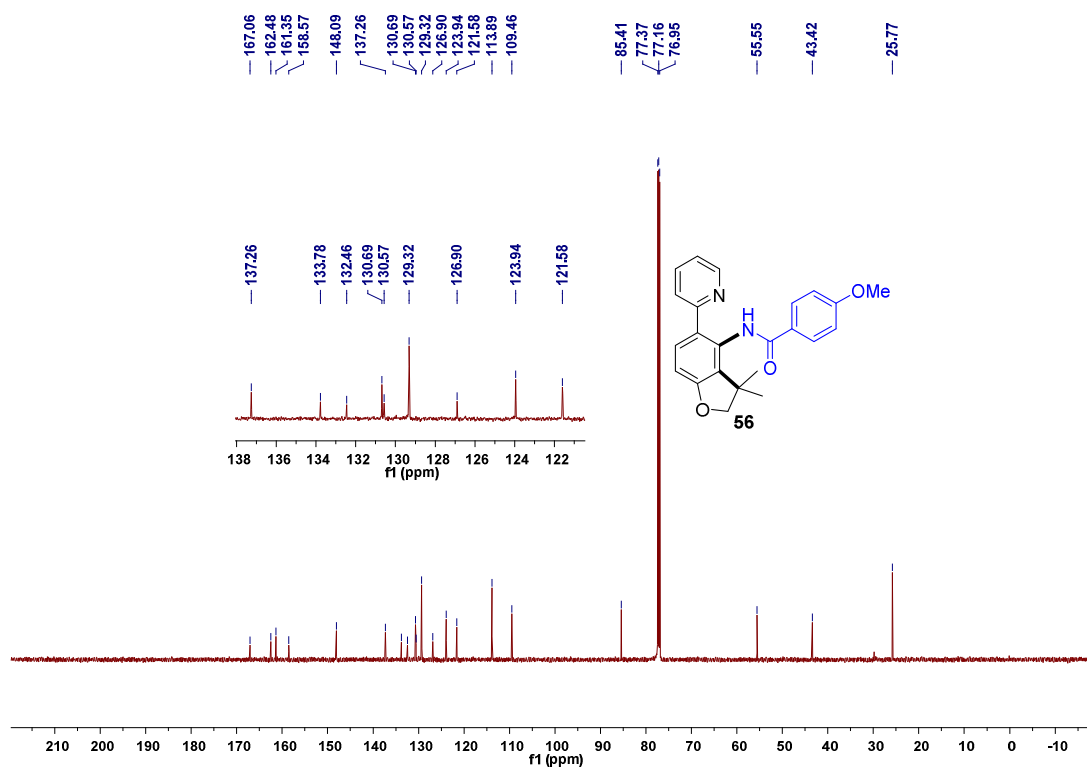

$^1\text{H}$  NMR (400 MHz,  $\text{CDCl}_3$ )

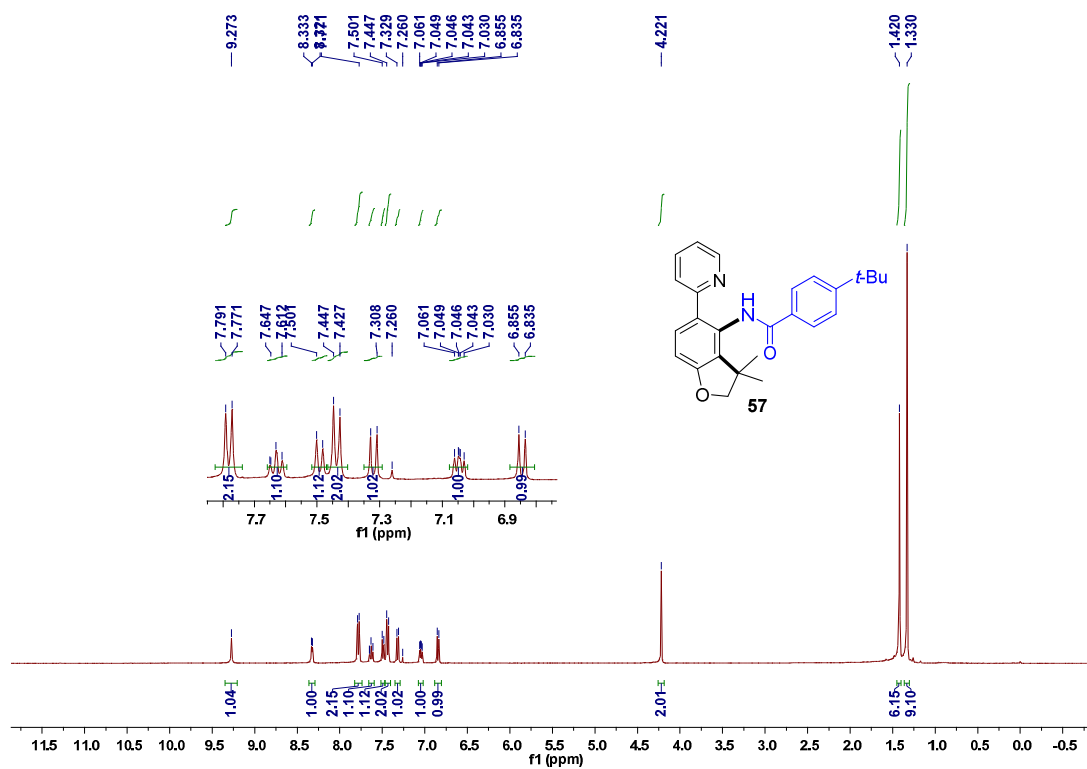

$^{13}\text{C}$  NMR (100 MHz,  $\text{CDCl}_3$ )

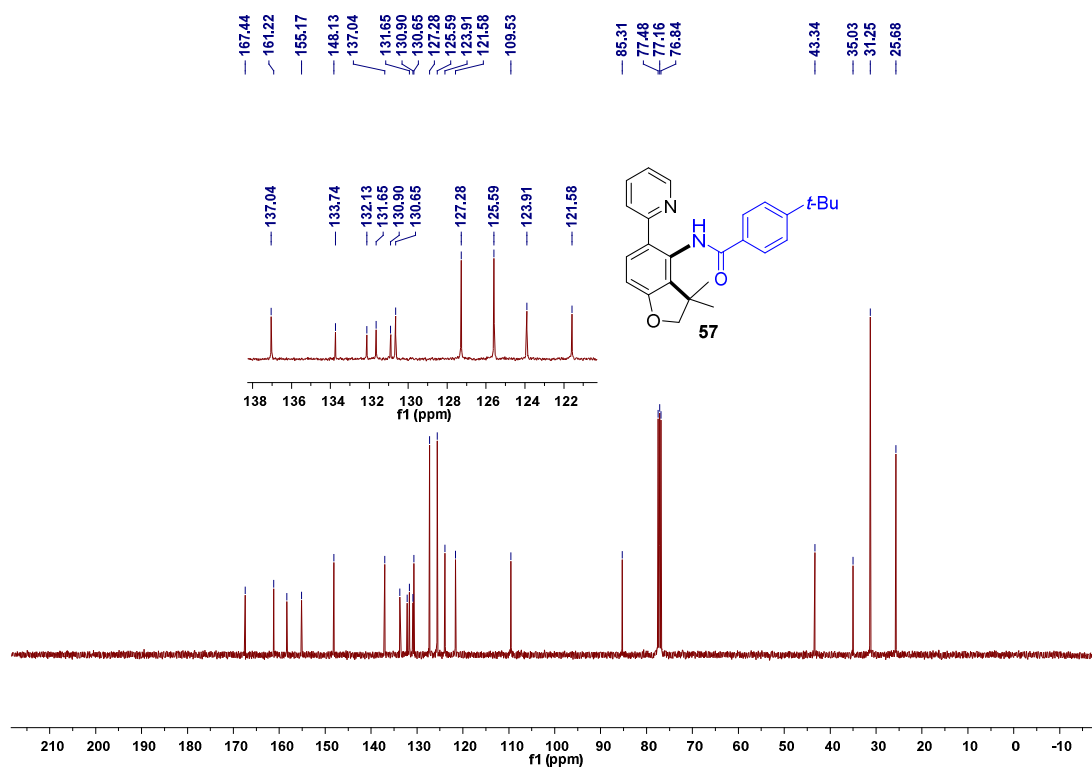

$^1\text{H}$  NMR (600 MHz,  $\text{CDCl}_3$ )

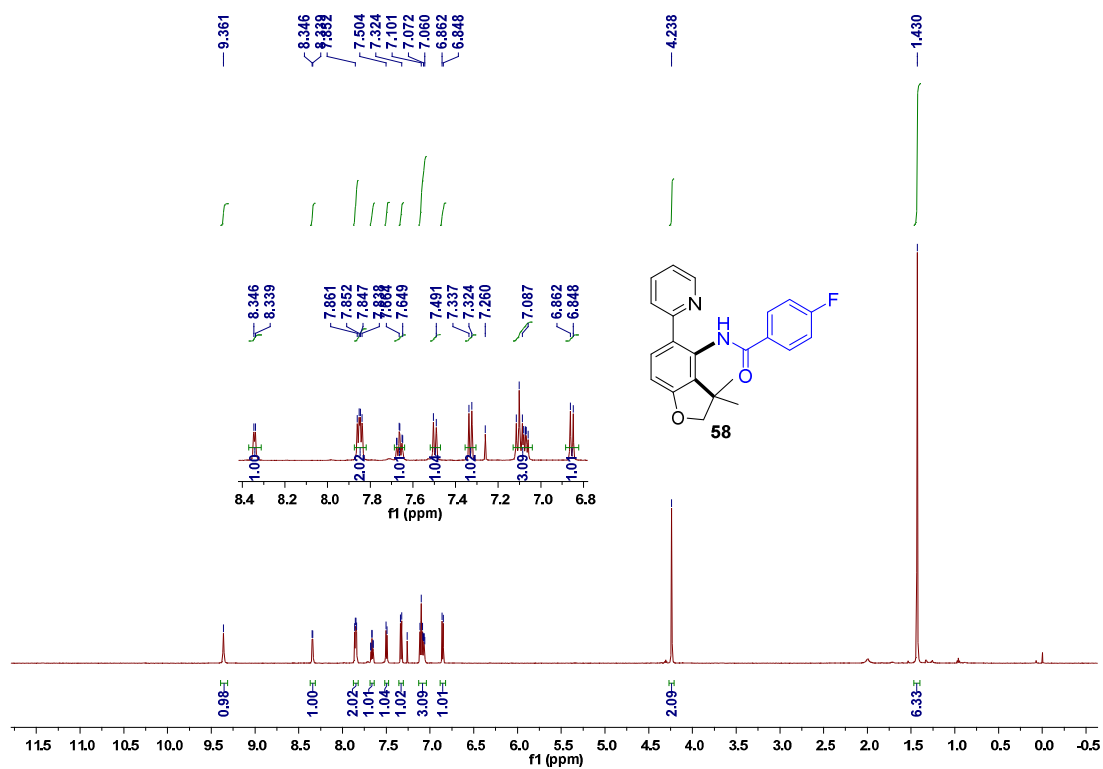

$^{13}\text{C}$  NMR (150 MHz,  $\text{CDCl}_3$ )

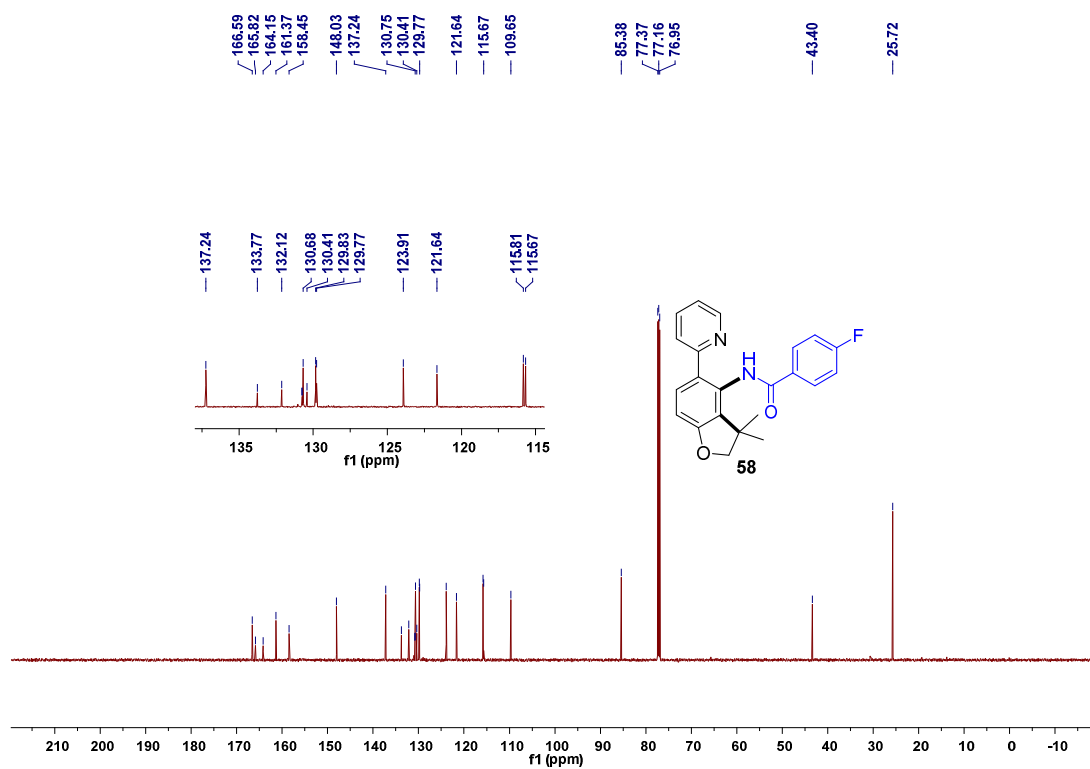

$^{19}\text{F}$  NMR (565 MHz,  $\text{CDCl}_3$ )

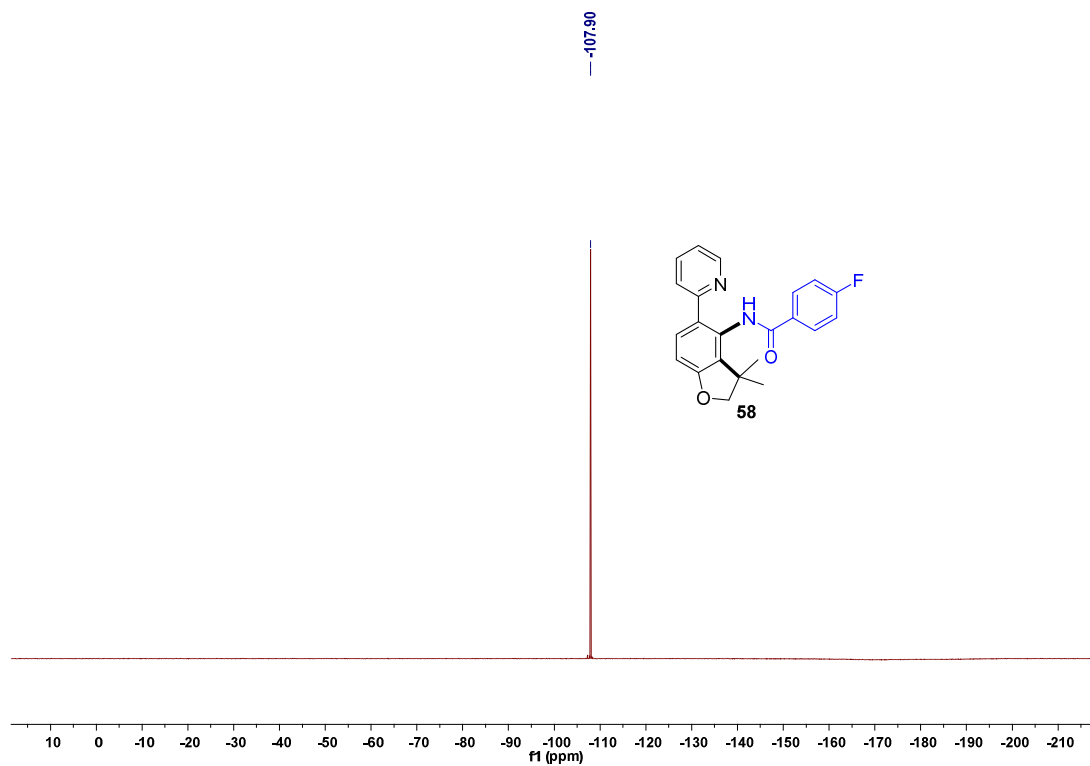



$^1\text{H}$  NMR (400 MHz,  $\text{CDCl}_3$ )

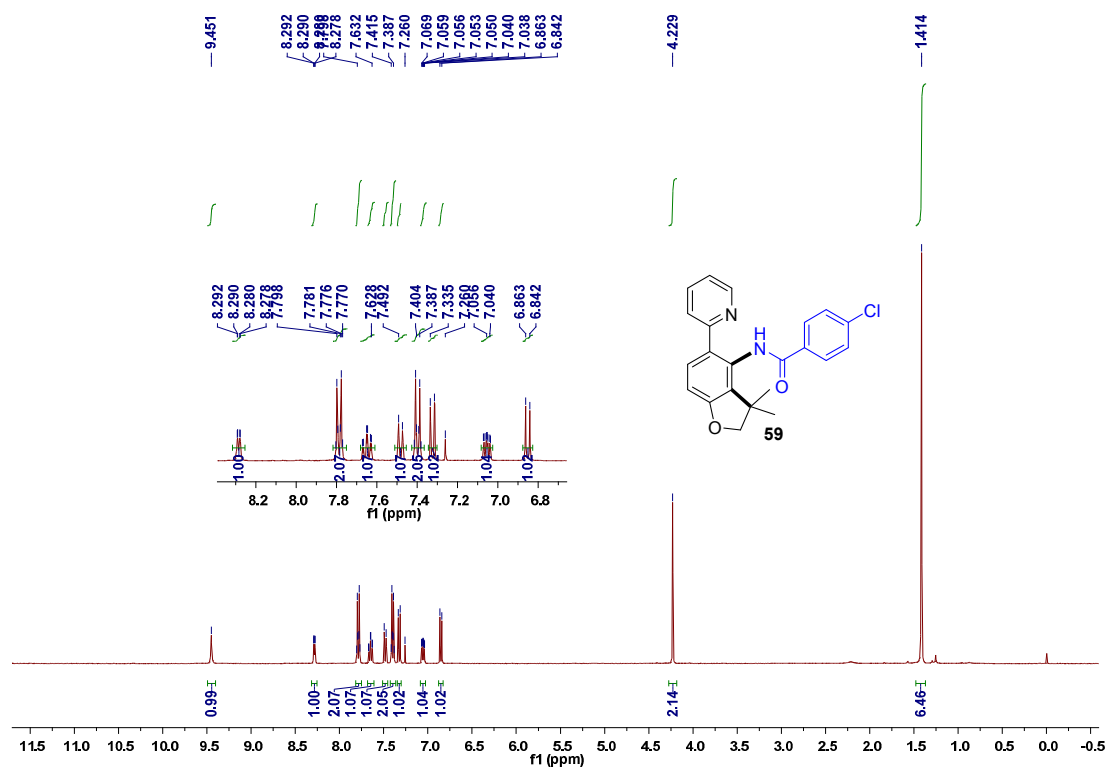

$^{13}\text{C}$  NMR (100 MHz,  $\text{CDCl}_3$ )

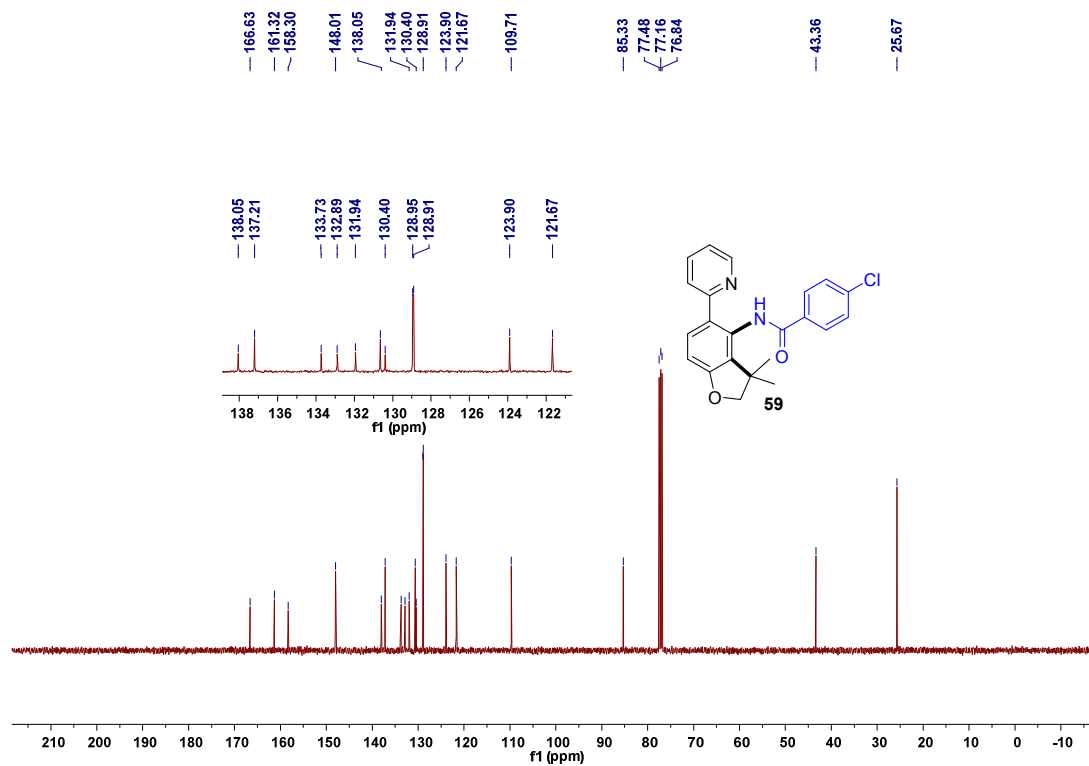

<sup>1</sup>H NMR (600 MHz, CDCl<sub>3</sub>)

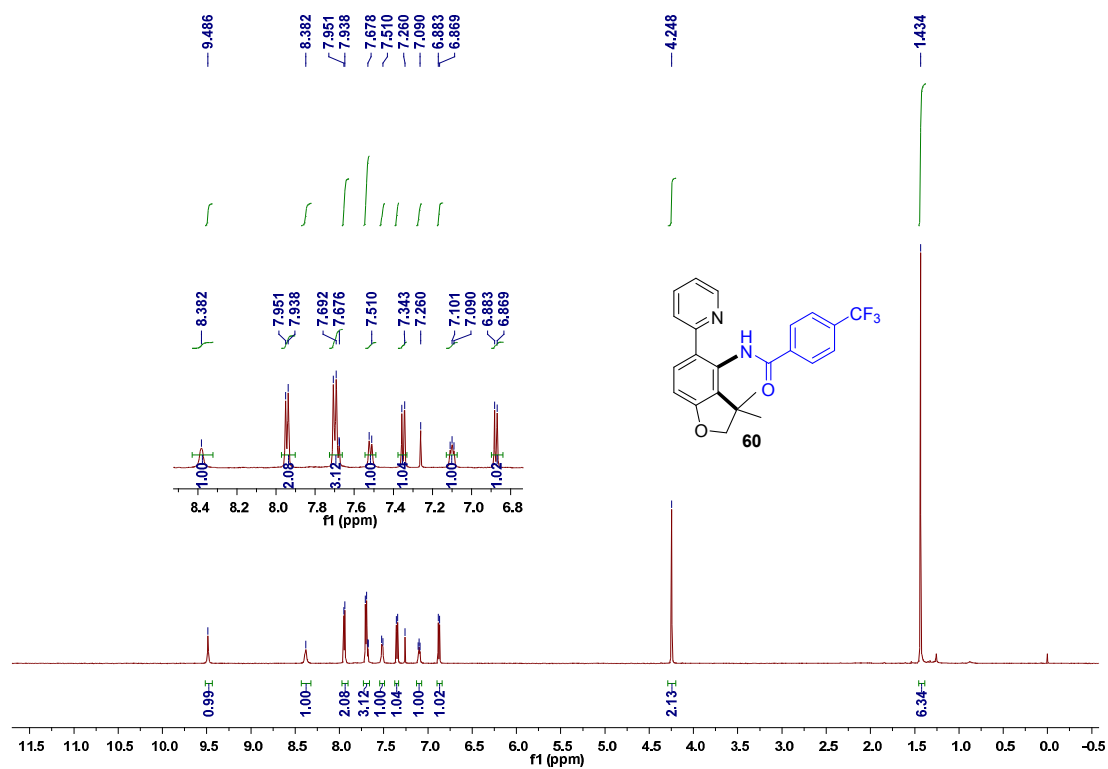

<sup>13</sup>C NMR (150 MHz, CDCl<sub>3</sub>)

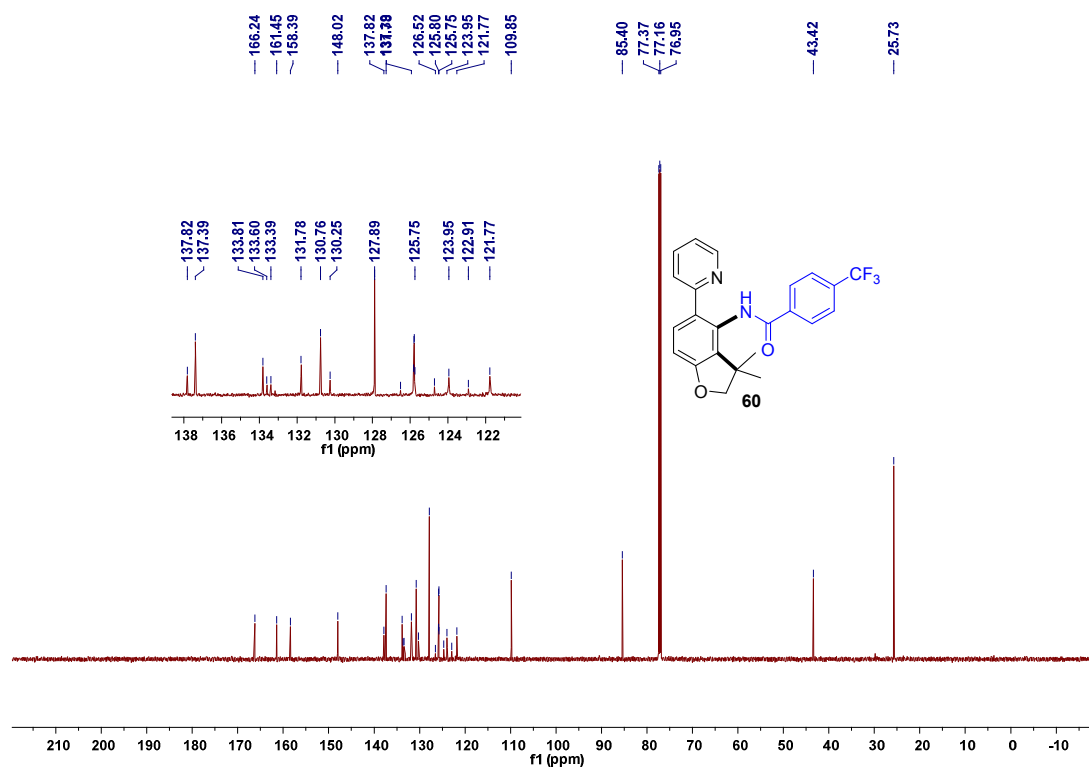

$^{19}\text{F}$  NMR (565 MHz,  $\text{CDCl}_3$ )

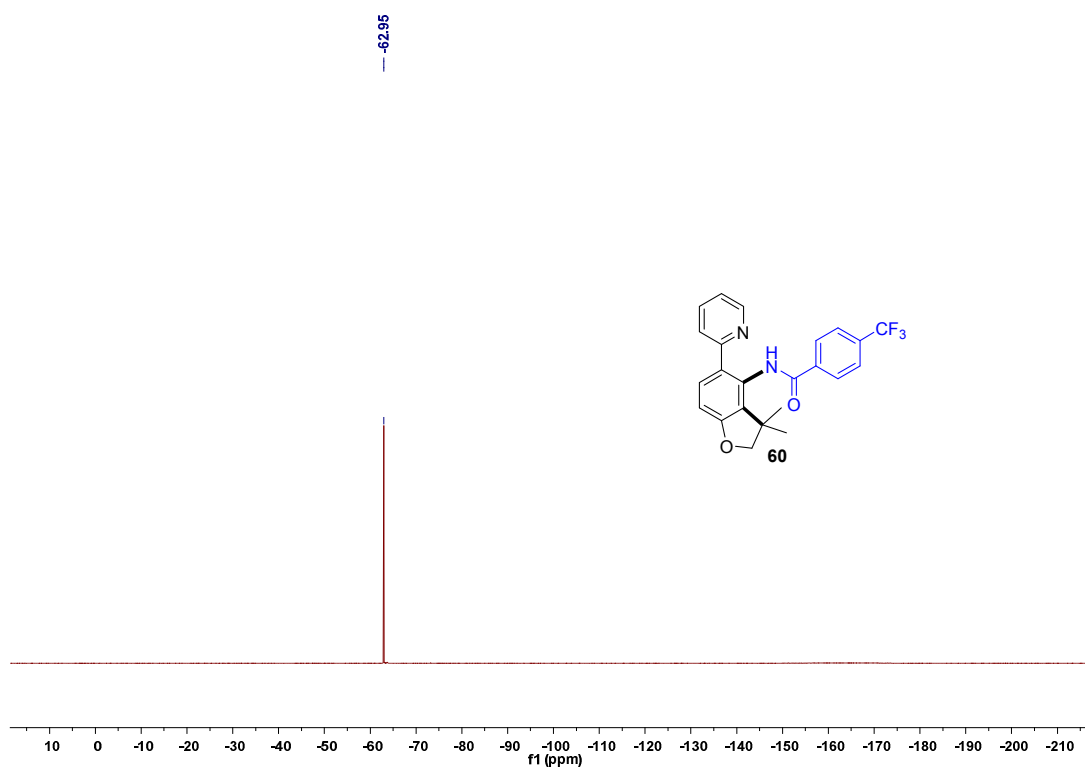

$^1\text{H}$  NMR (600 MHz,  $\text{CDCl}_3$ )

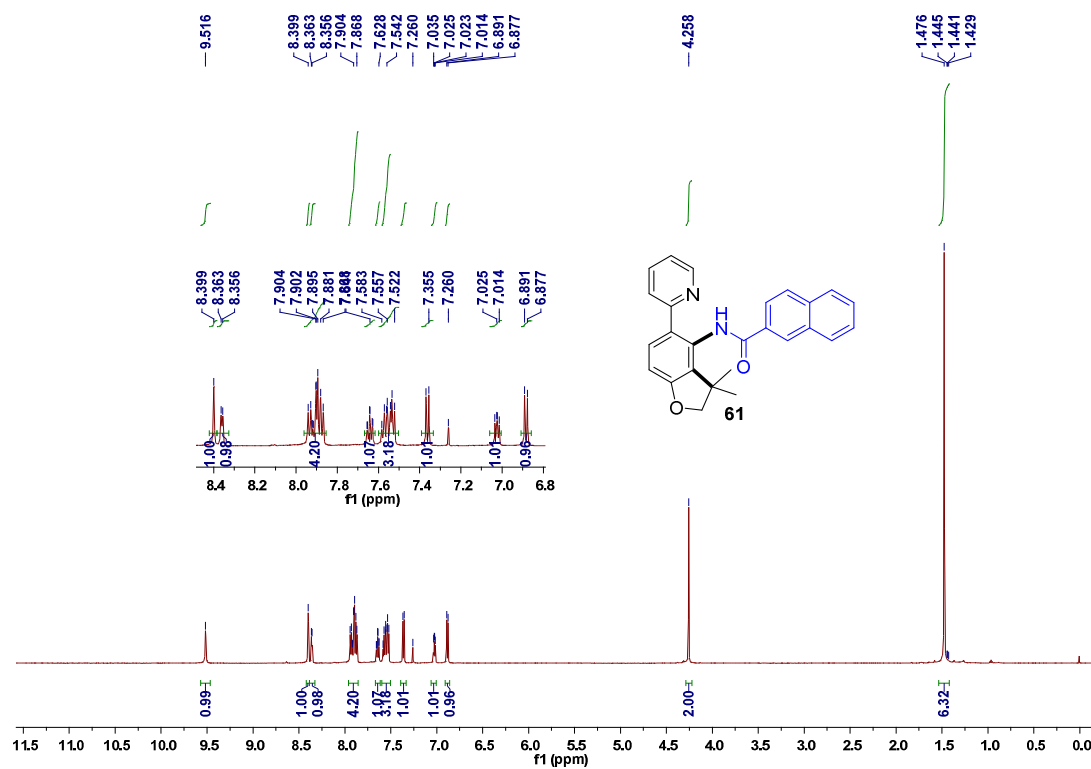

$^{13}\text{C}$  NMR (150 MHz,  $\text{CDCl}_3$ )

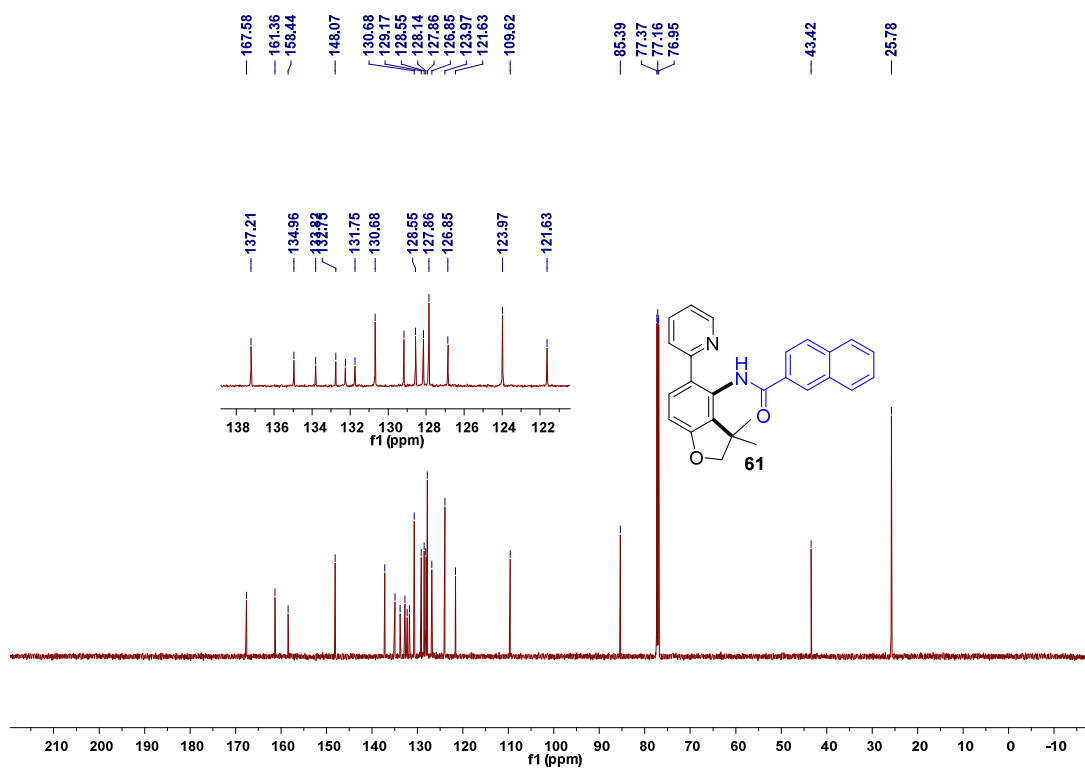

$^1\text{H}$  NMR (400 MHz,  $\text{CDCl}_3$ )

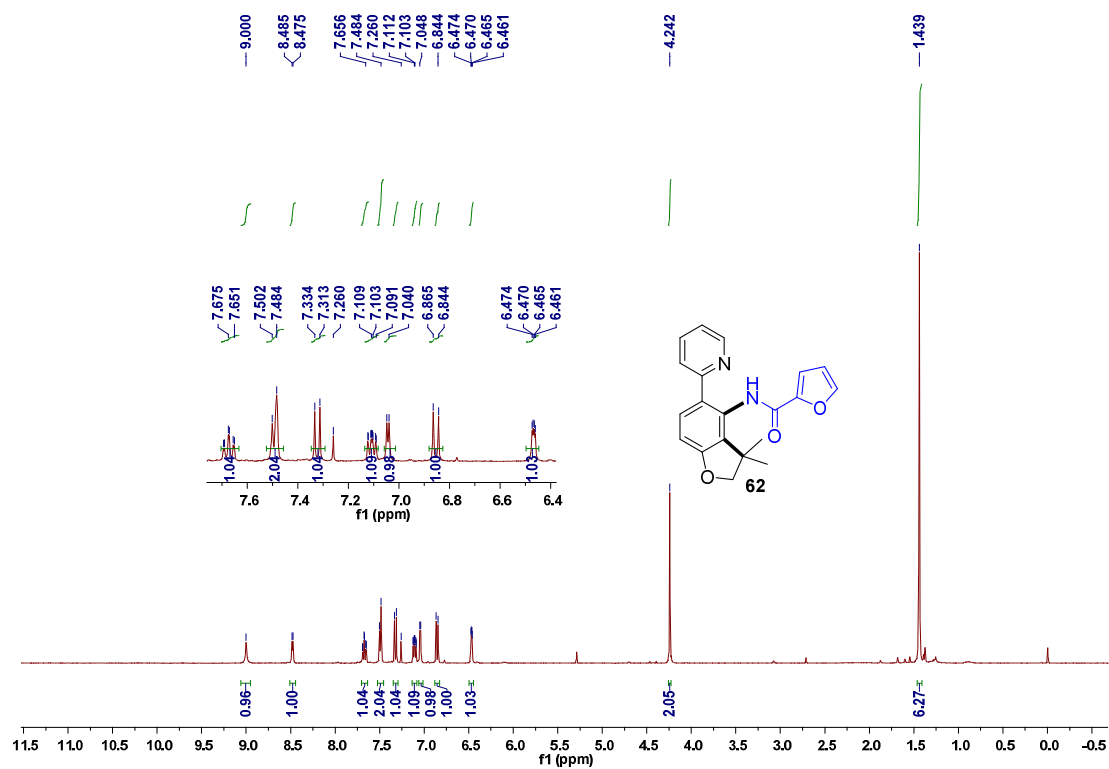

$^{13}\text{C}$  NMR (100 MHz,  $\text{CDCl}_3$ )

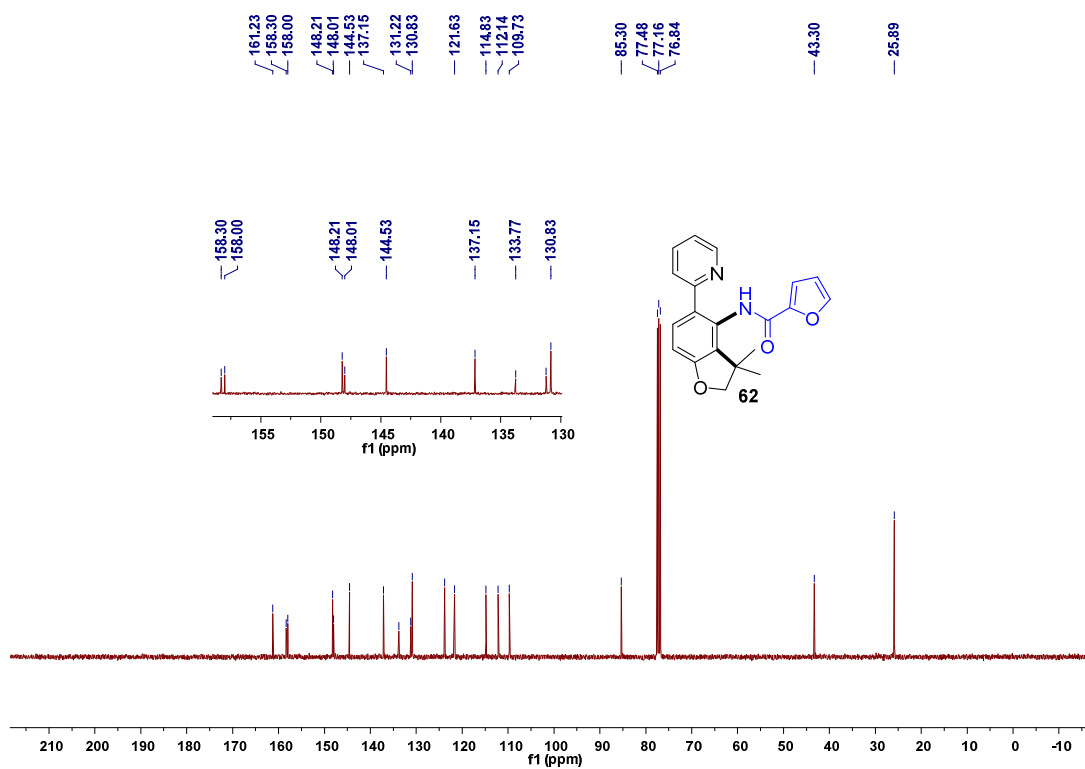

$^1\text{H}$  NMR (400 MHz,  $\text{CDCl}_3$ )

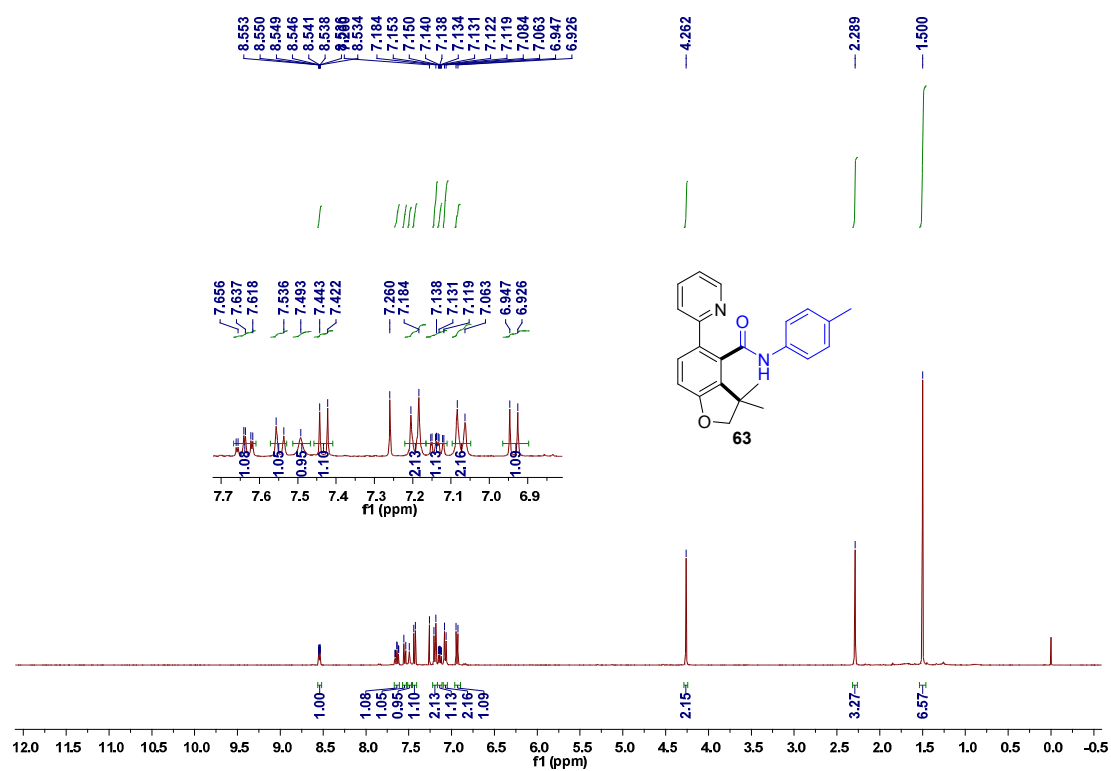

$^{13}\text{C}$  NMR (100 MHz,  $\text{CDCl}_3$ )

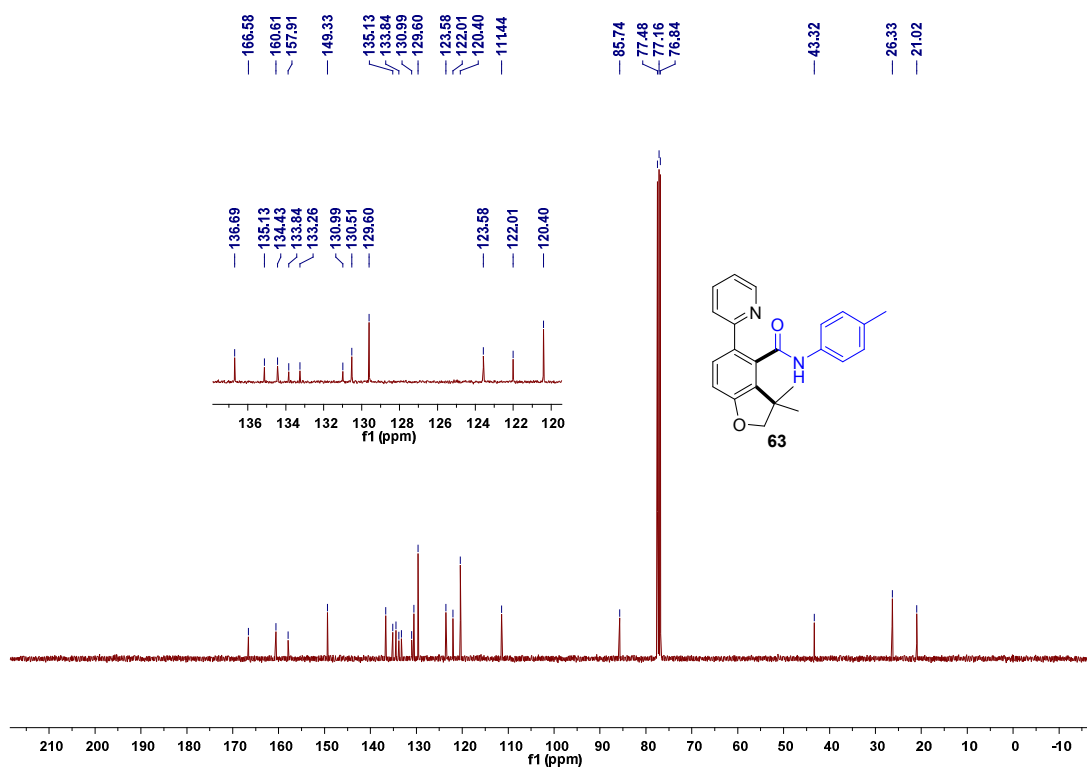

$^1\text{H}$  NMR (600 MHz,  $\text{CDCl}_3$ )

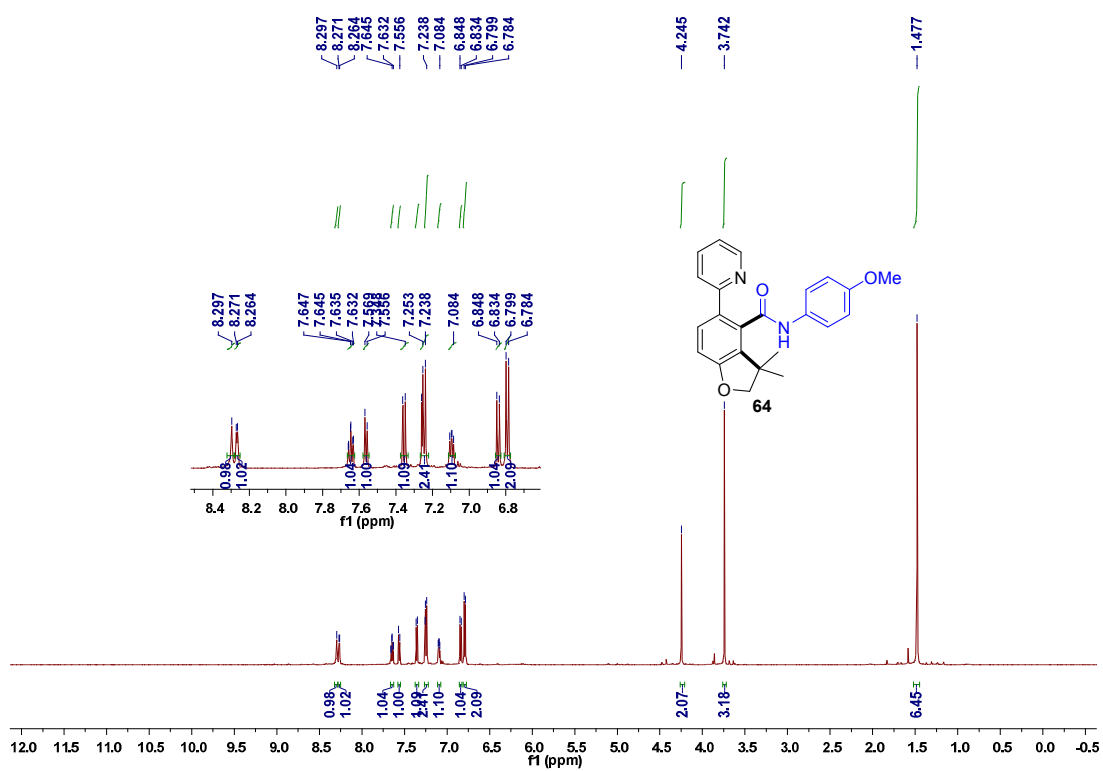

$^{13}\text{C}$  NMR (150 MHz,  $\text{CDCl}_3$ )

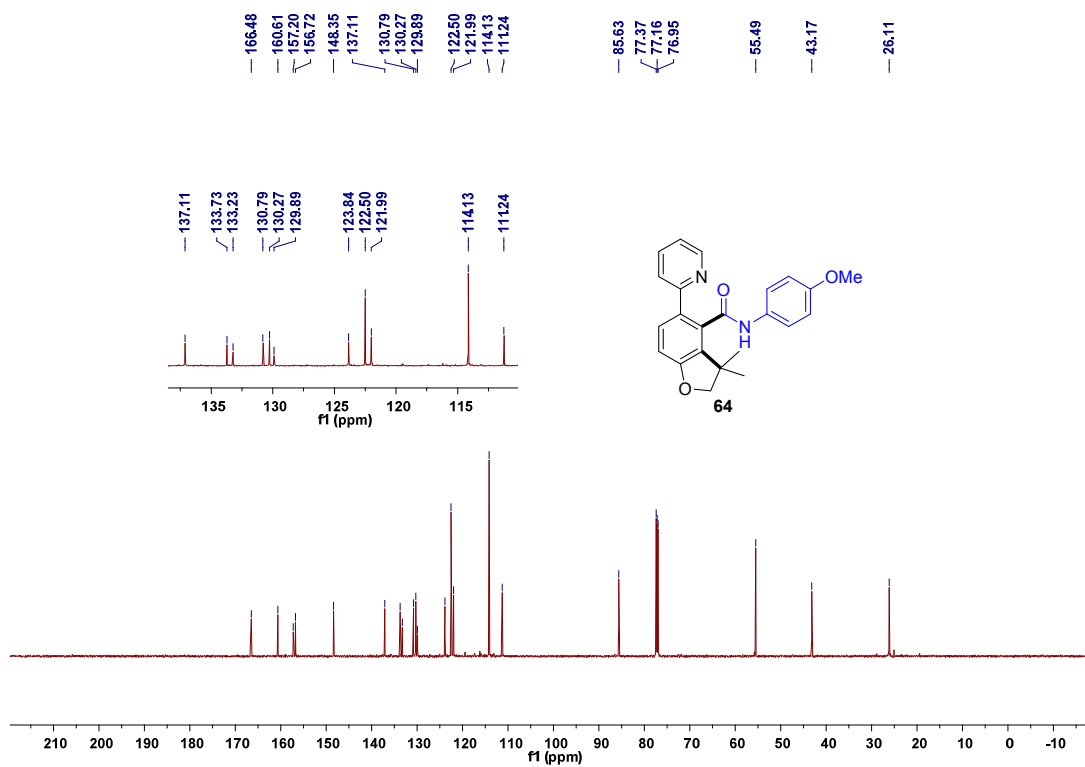

$^1\text{H}$  NMR (600 MHz,  $\text{CDCl}_3$ )

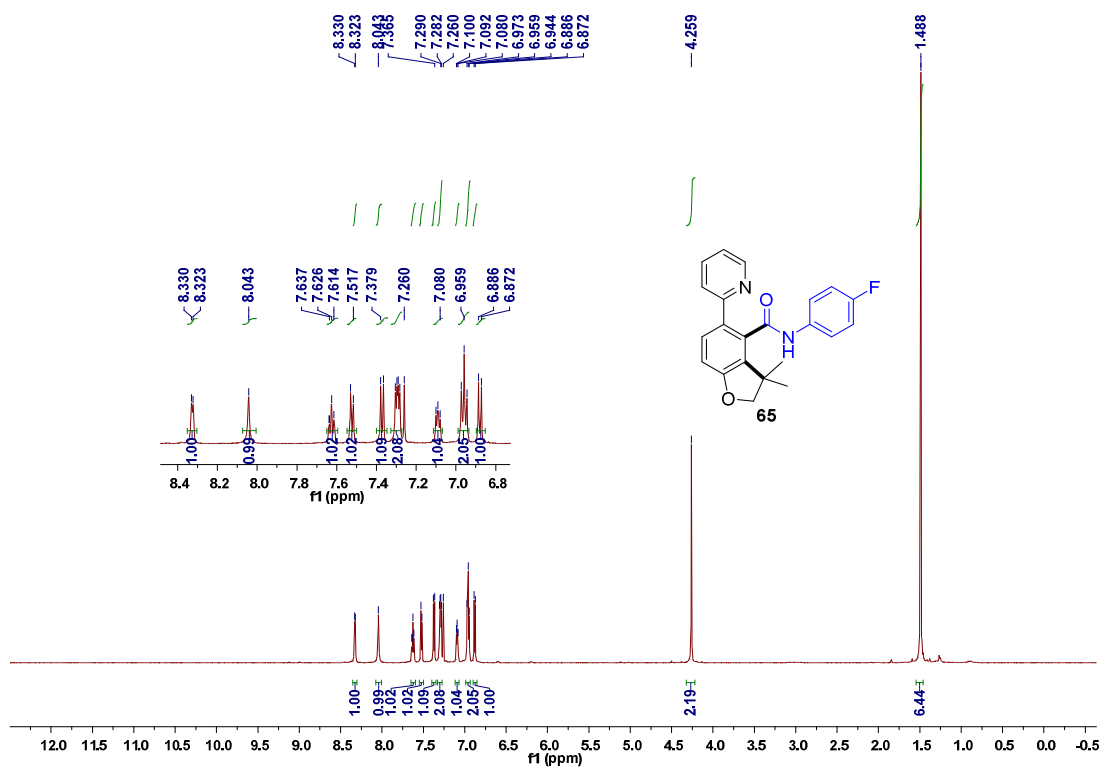

$^{13}\text{C}$  NMR (150 MHz,  $\text{CDCl}_3$ )

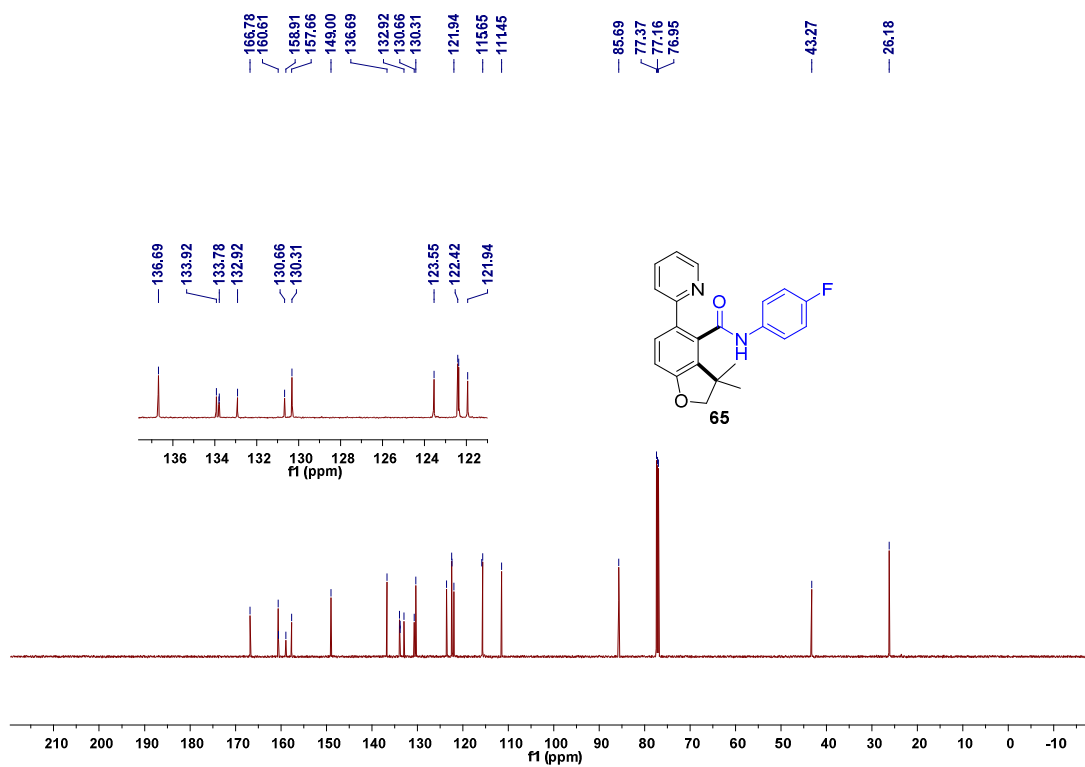

$^{19}\text{F}$  NMR (565 MHz,  $\text{CDCl}_3$ )

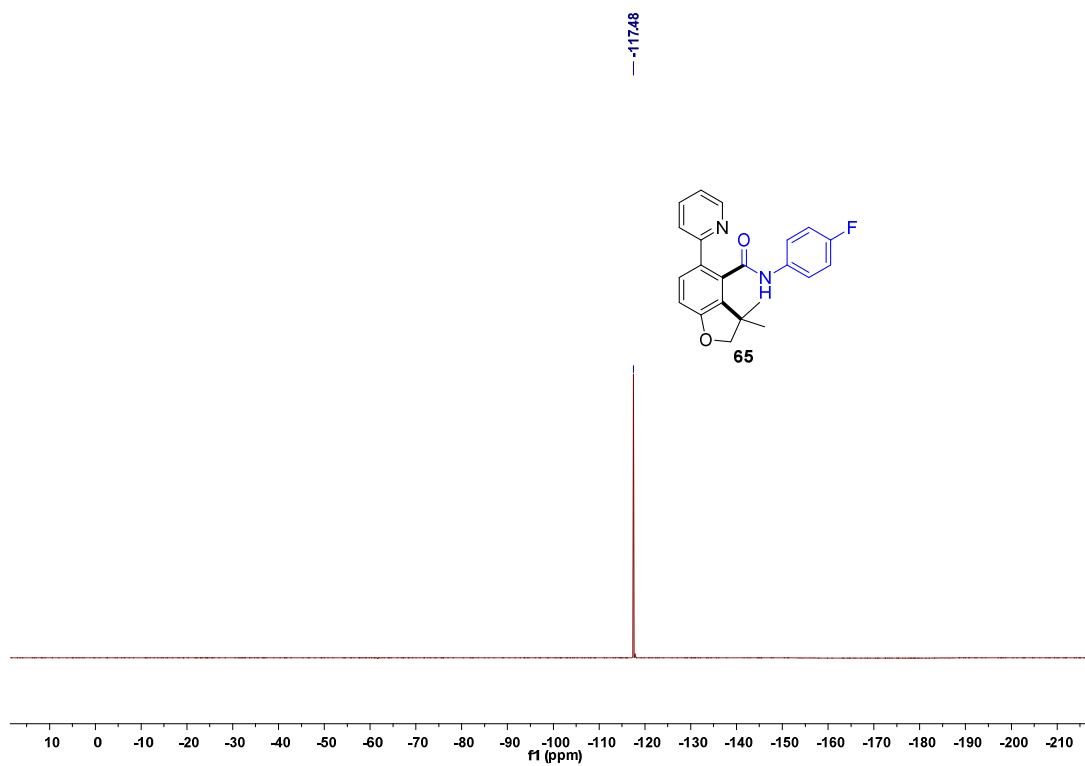



$^1\text{H}$  NMR (600 MHz,  $\text{CDCl}_3$ )

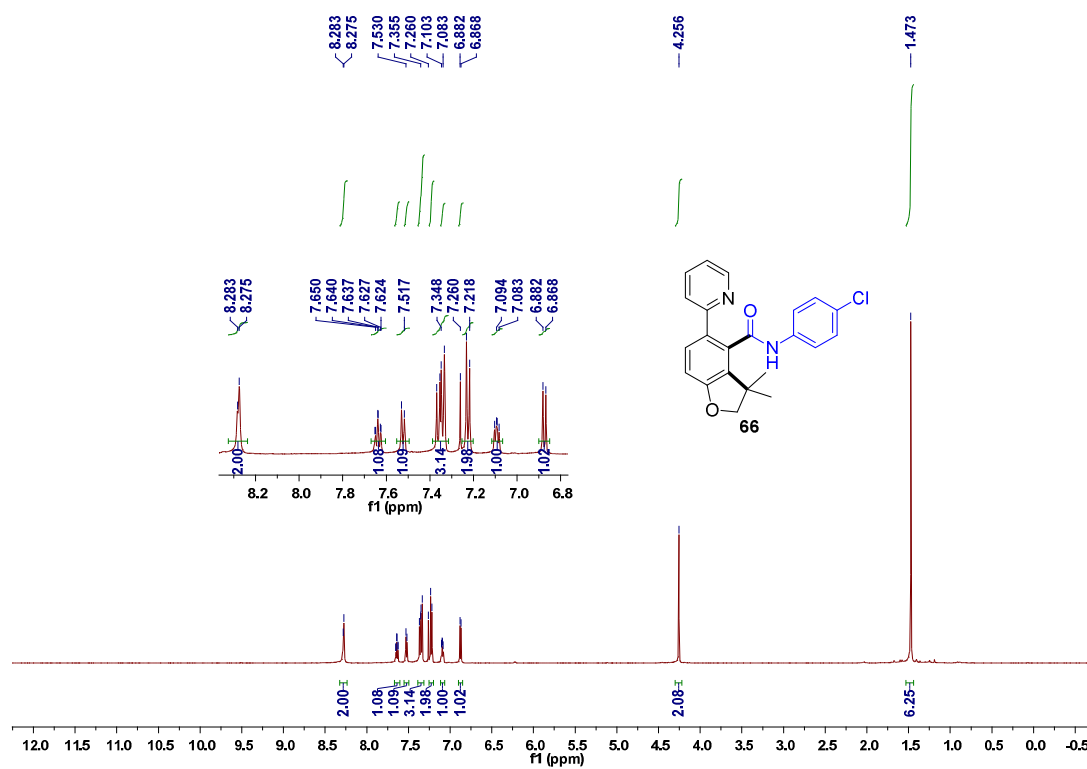

$^{13}\text{C}$  NMR (150 MHz,  $\text{CDCl}_3$ )

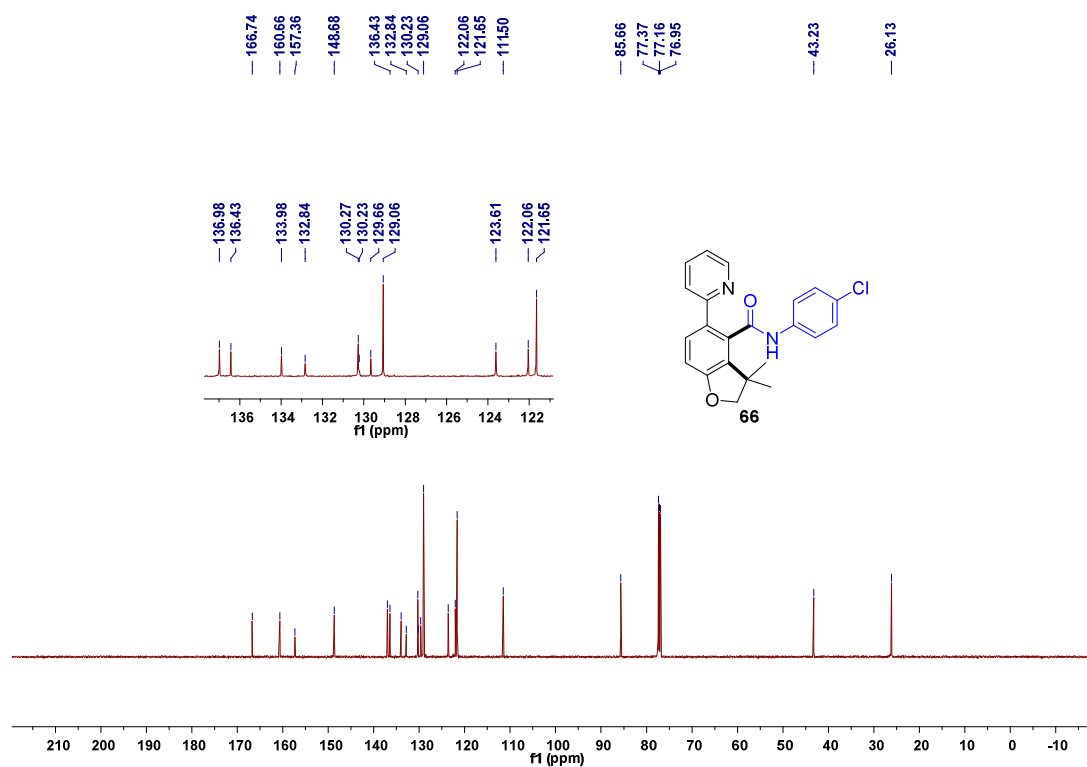

$^1\text{H}$  NMR (600 MHz,  $\text{DMSO-}d_6$ )

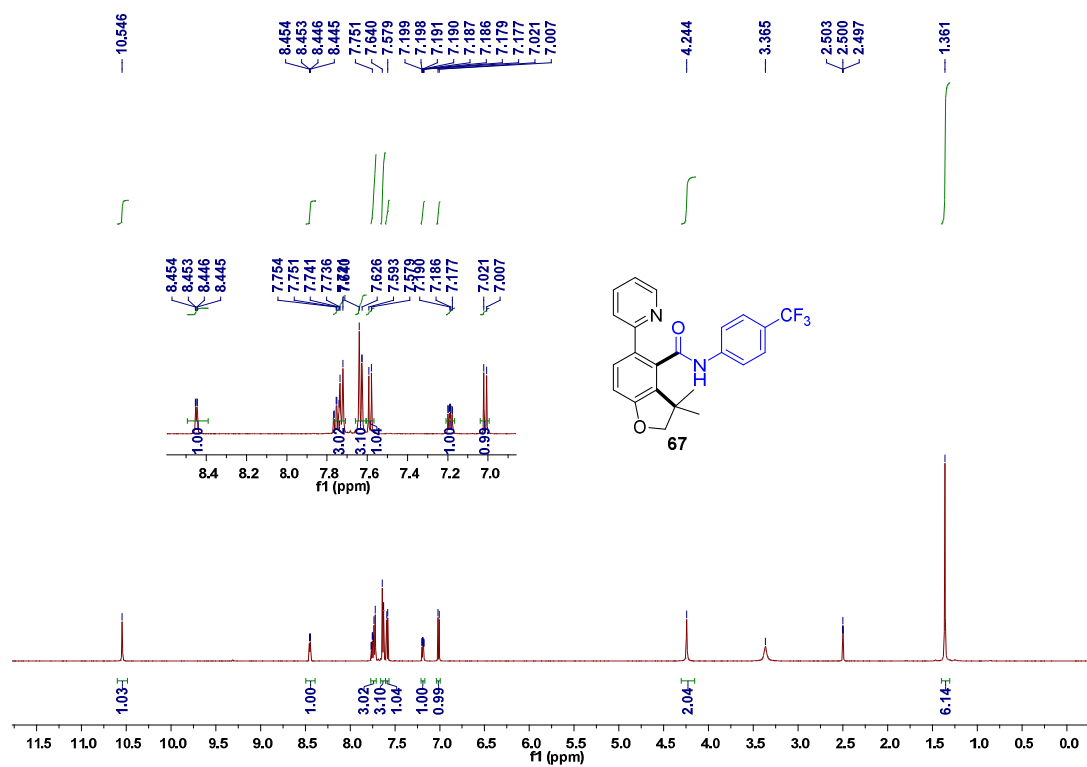

$^{13}\text{C}$  NMR (150 MHz,  $\text{DMSO-}d_6$ )

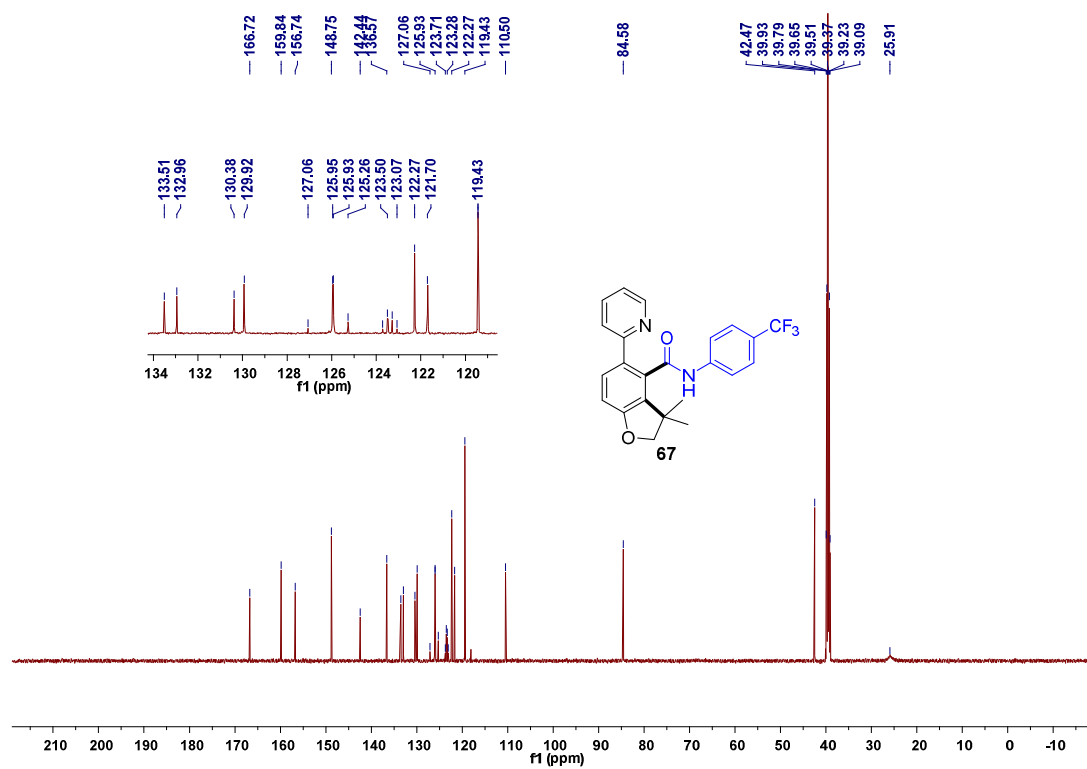

$^{19}\text{F}$  NMR (565 MHz,  $\text{DMSO-}d_6$ )

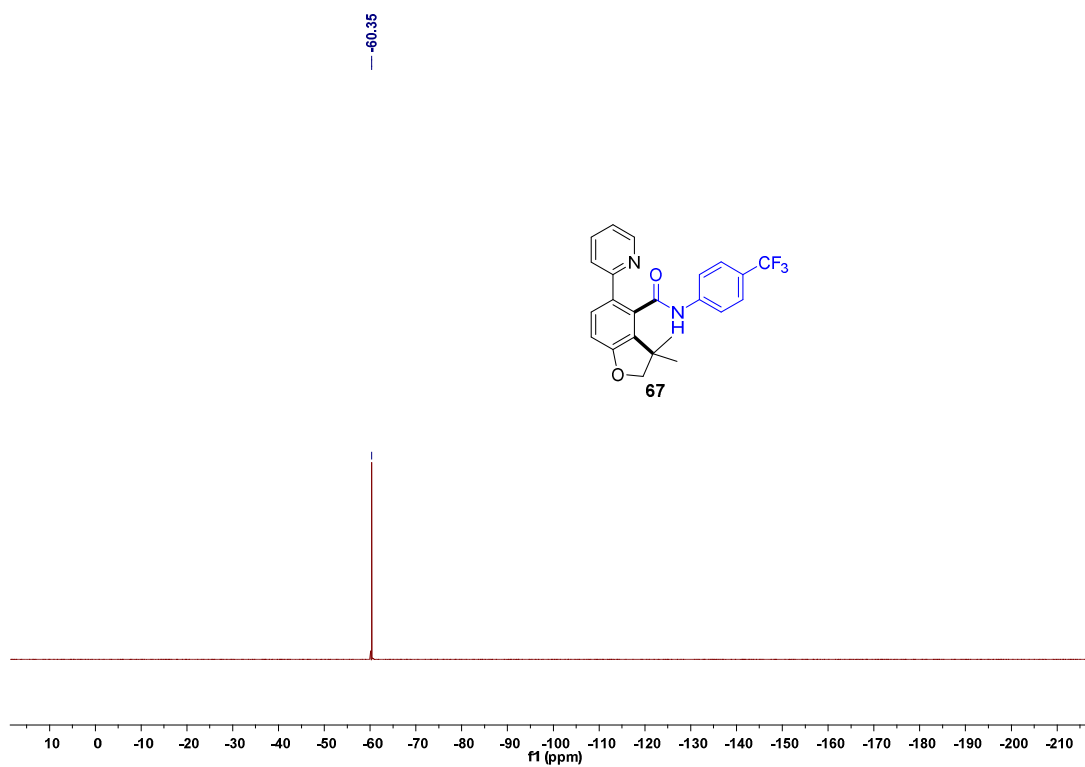

$^1\text{H}$  NMR (600 MHz,  $\text{CDCl}_3$ )

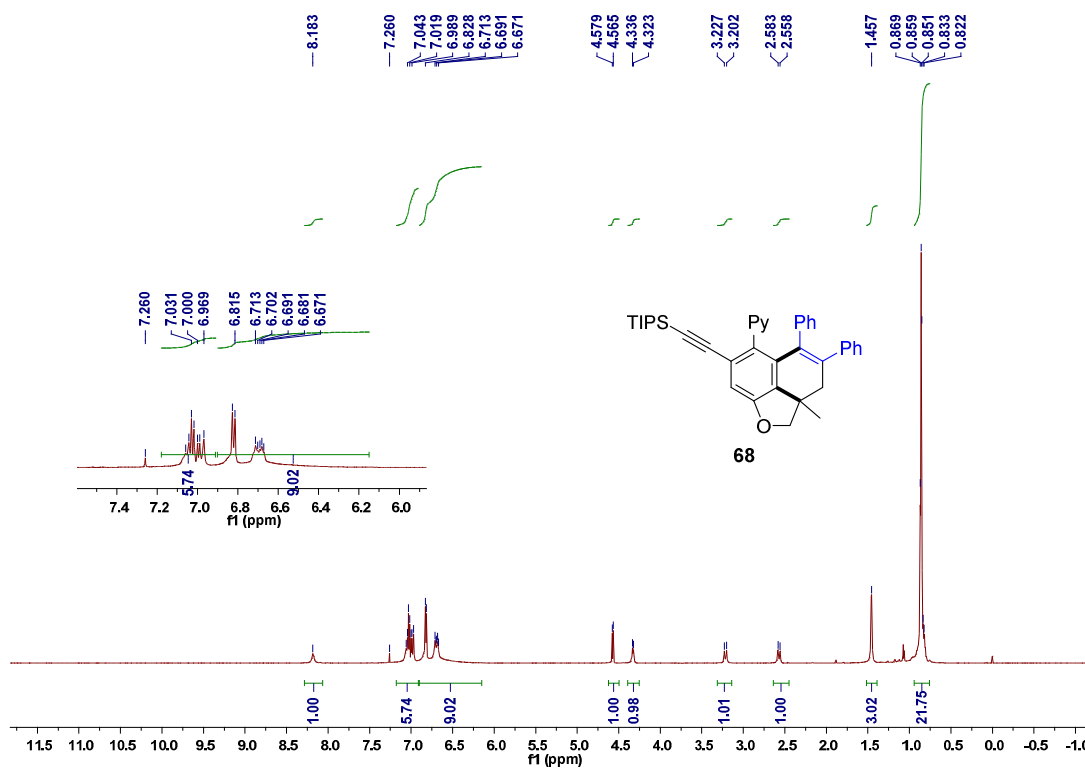

$^{13}\text{C}$  NMR (150 MHz,  $\text{CDCl}_3$ )

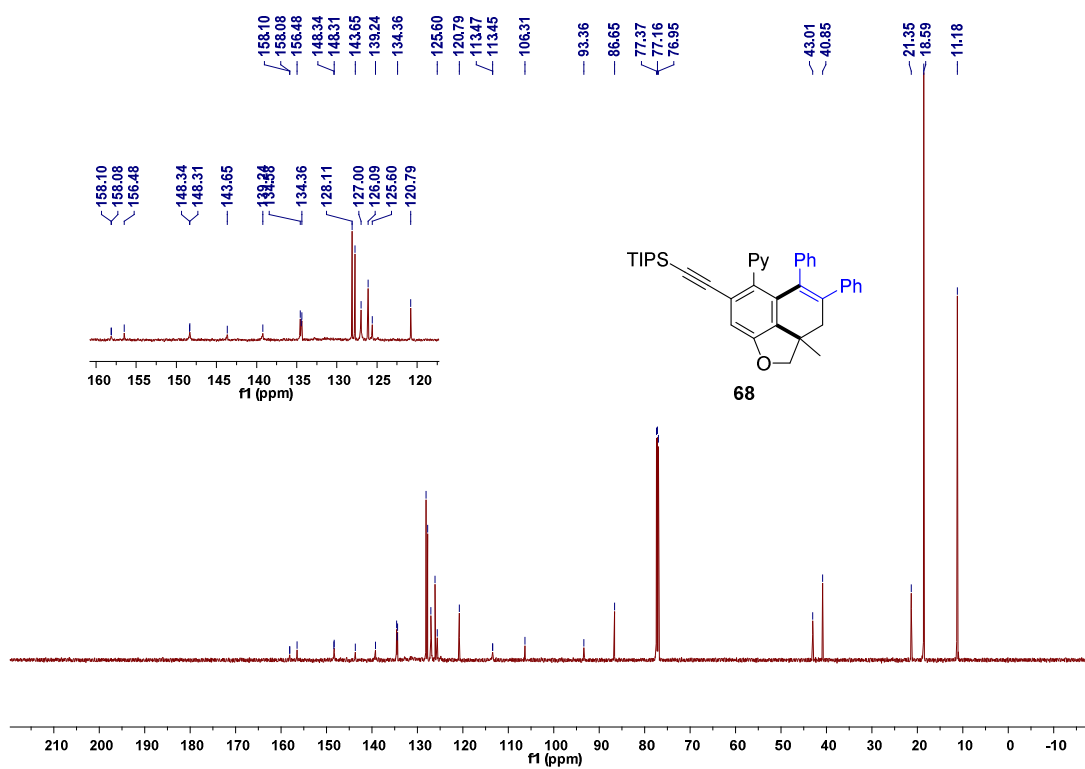

$^1\text{H}$  NMR (600 MHz,  $\text{CDCl}_3$ )

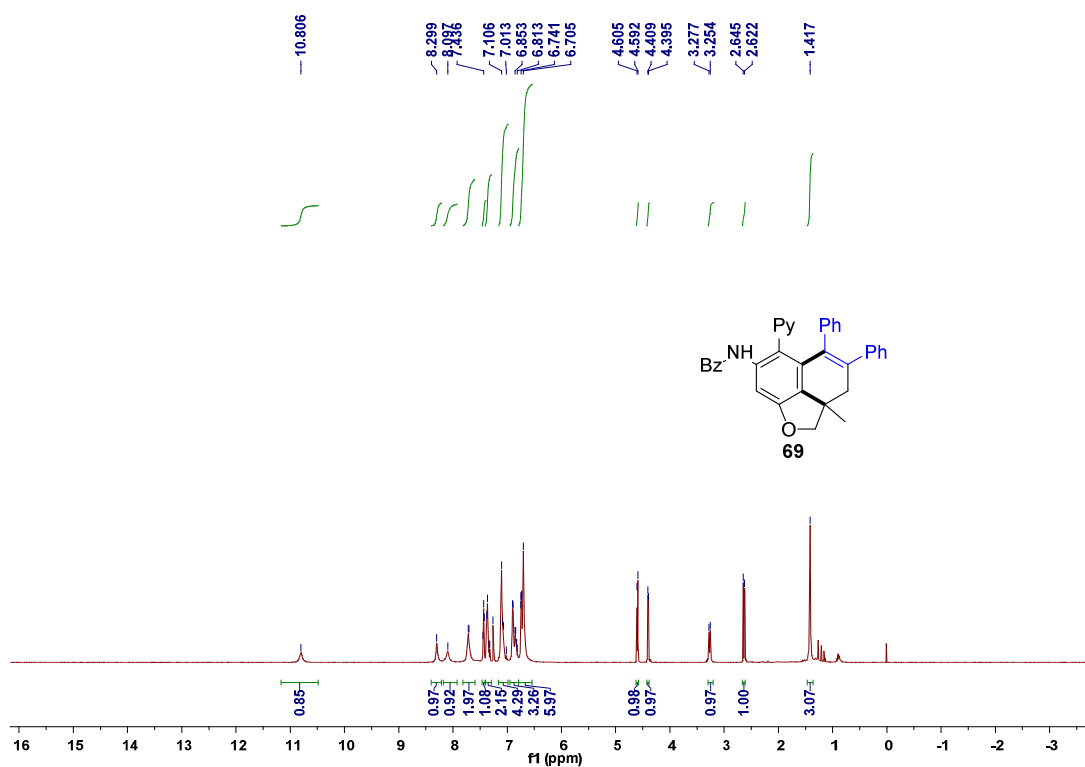

$^{13}\text{C}$  NMR (150 MHz,  $\text{CDCl}_3$ )

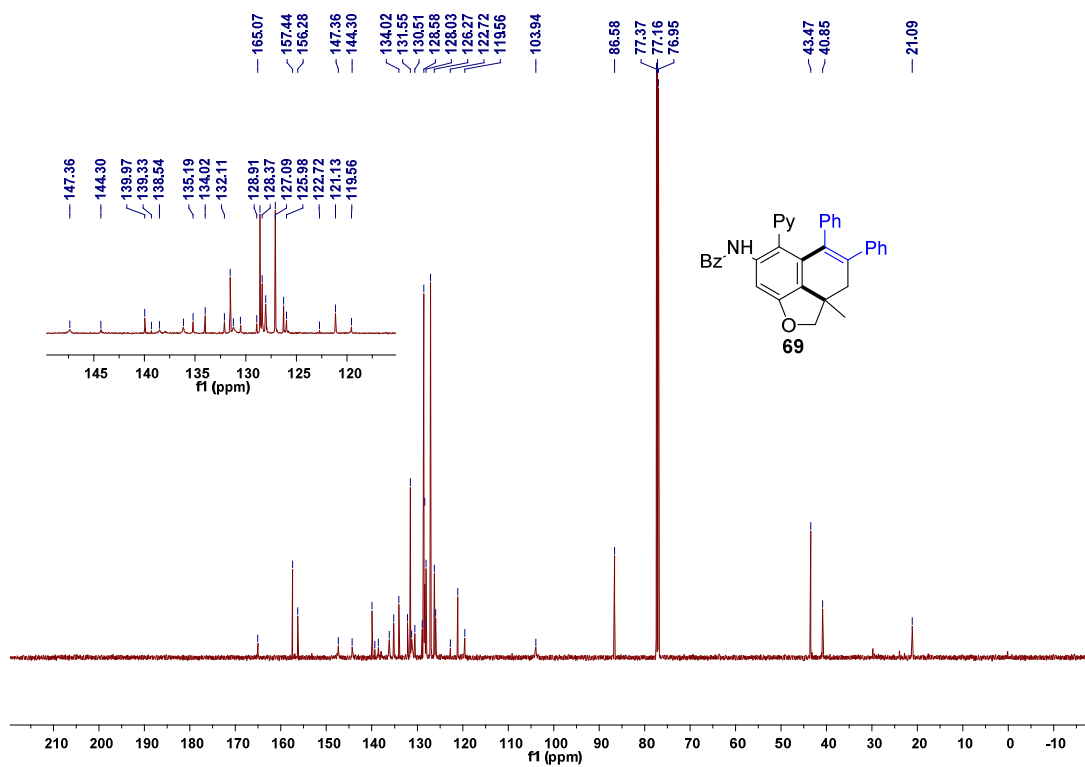

$^1\text{H}$  NMR (600 MHz,  $\text{CDCl}_3$ )

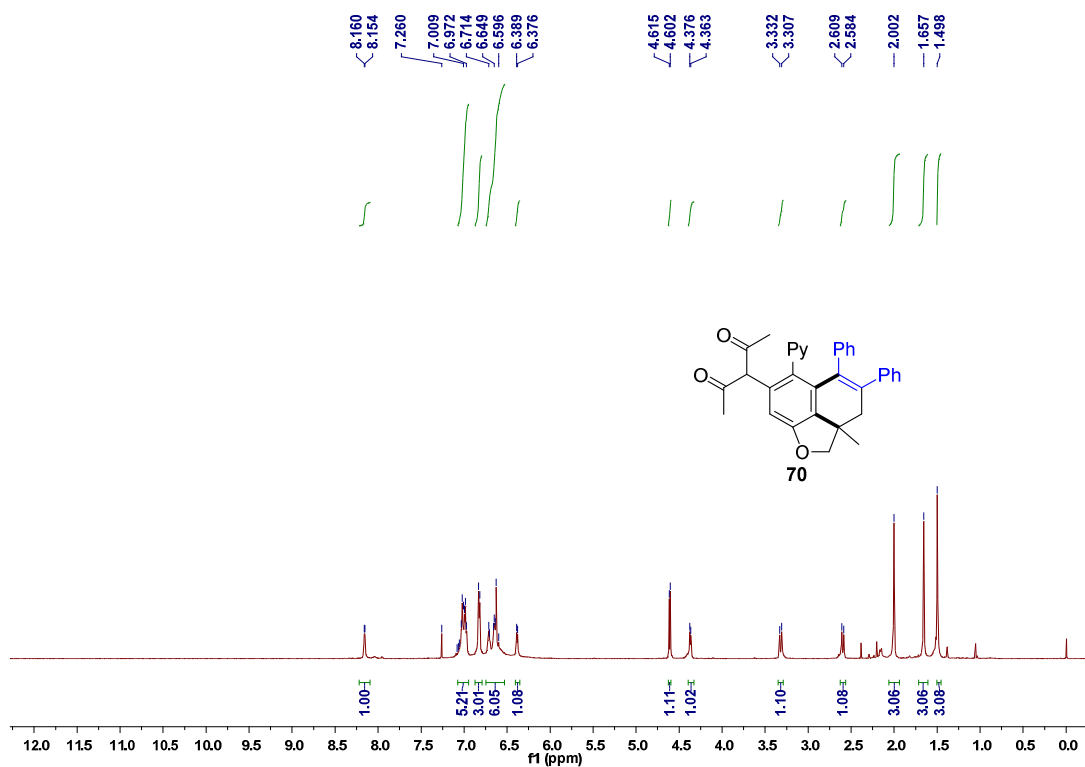

$^{13}\text{C}$  NMR (150 MHz,  $\text{CDCl}_3$ )

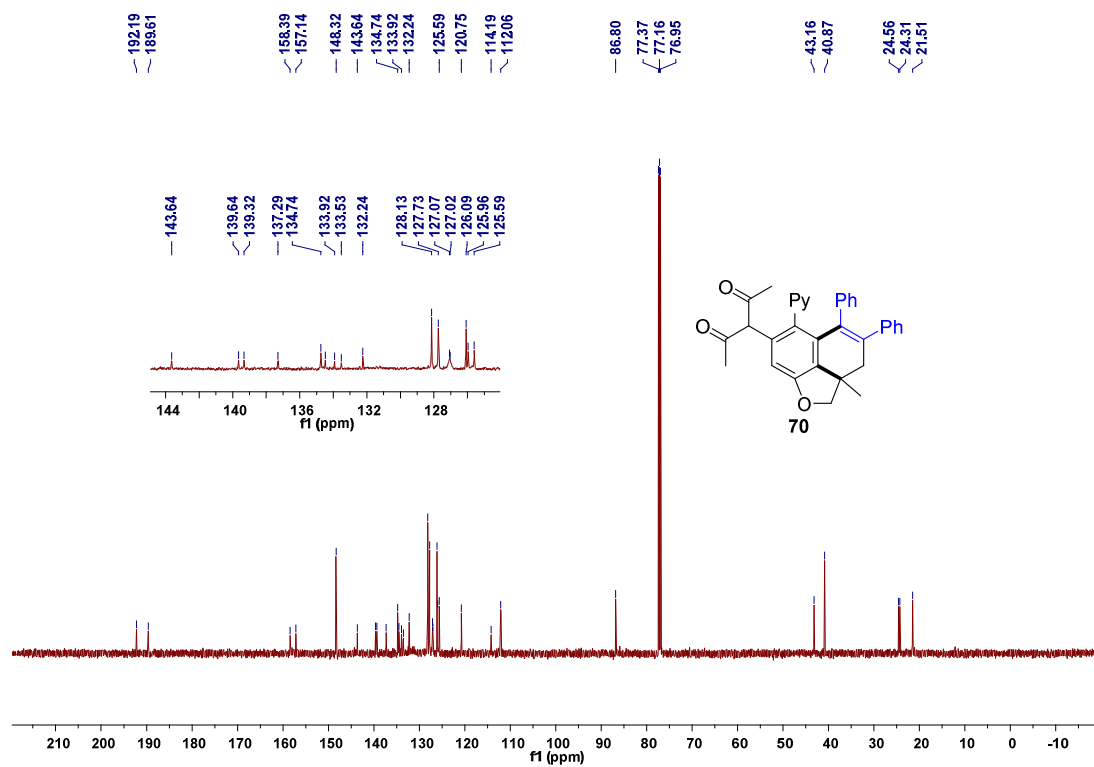

$^1\text{H}$  NMR (600 MHz,  $\text{DMSO}-d_6$ )

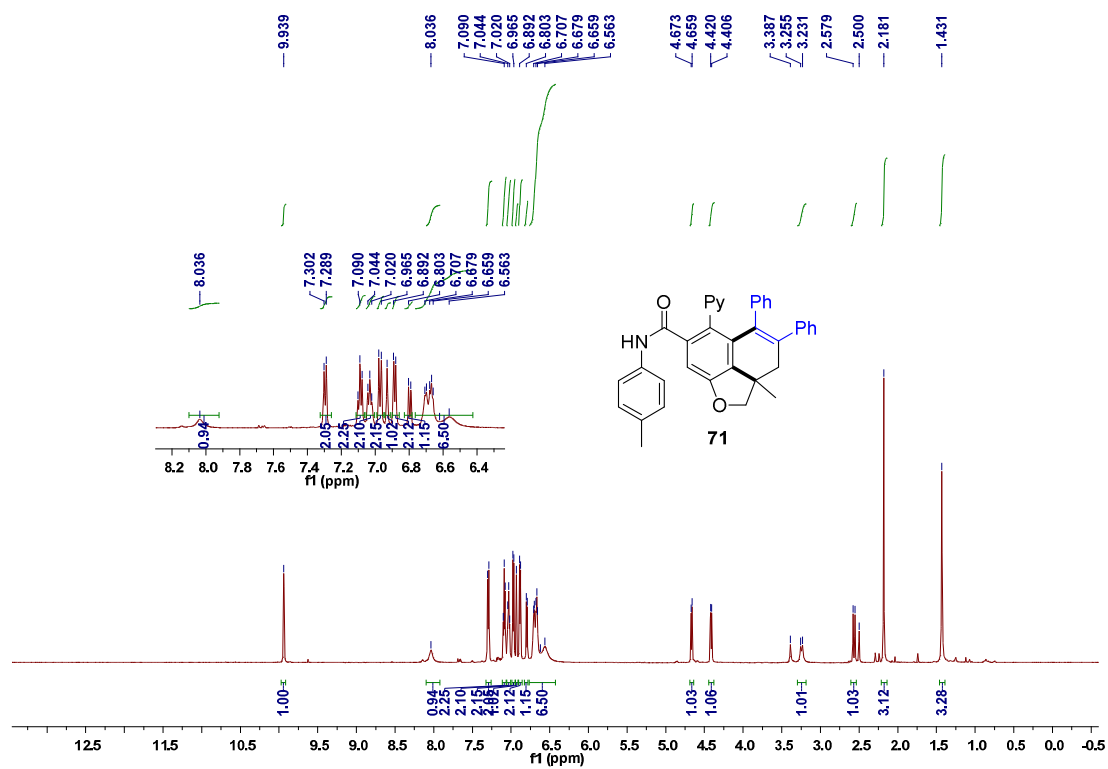

$^{13}\text{C}$  NMR (150 MHz,  $\text{CDCl}_3$ )

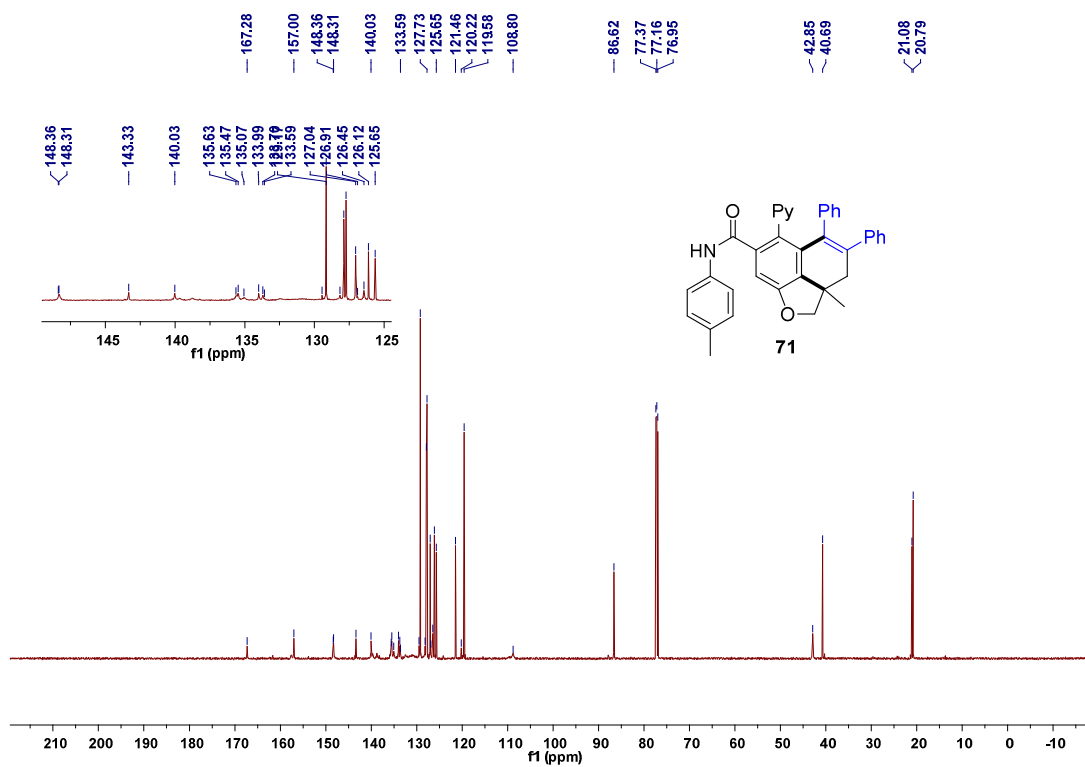

$^1\text{H}$  NMR (600 MHz,  $\text{CDCl}_3$ )

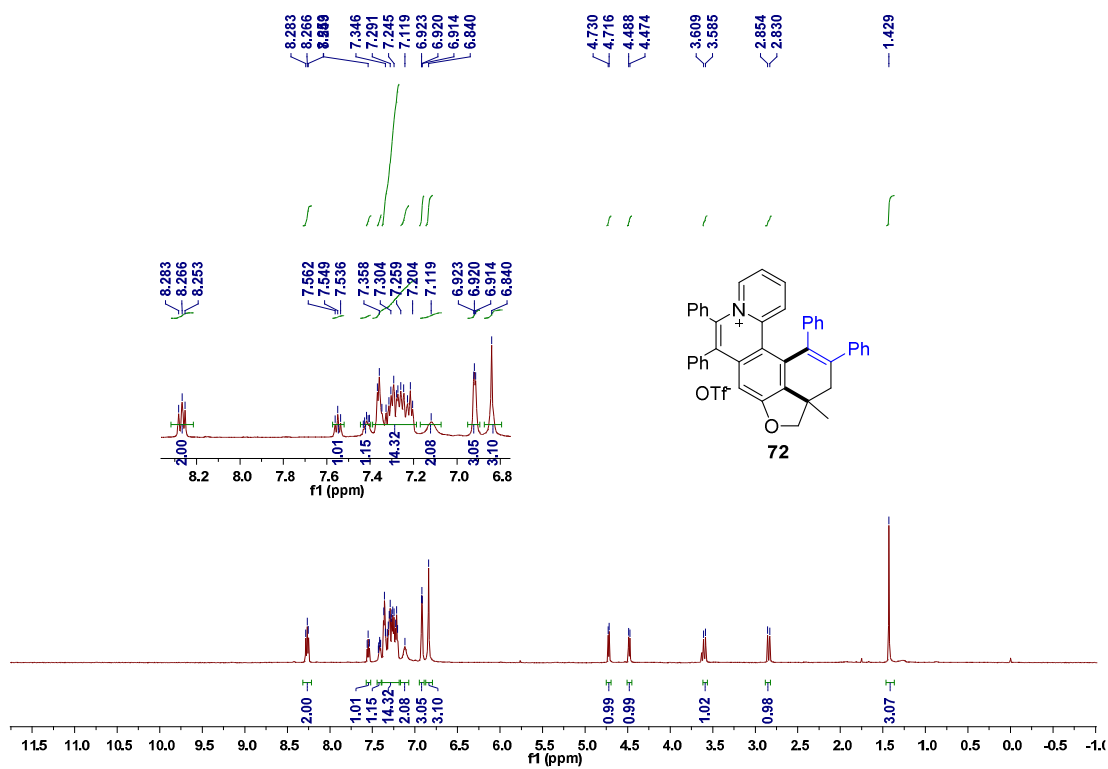

$^{13}\text{C}$  NMR (150 MHz,  $\text{CDCl}_3$ )

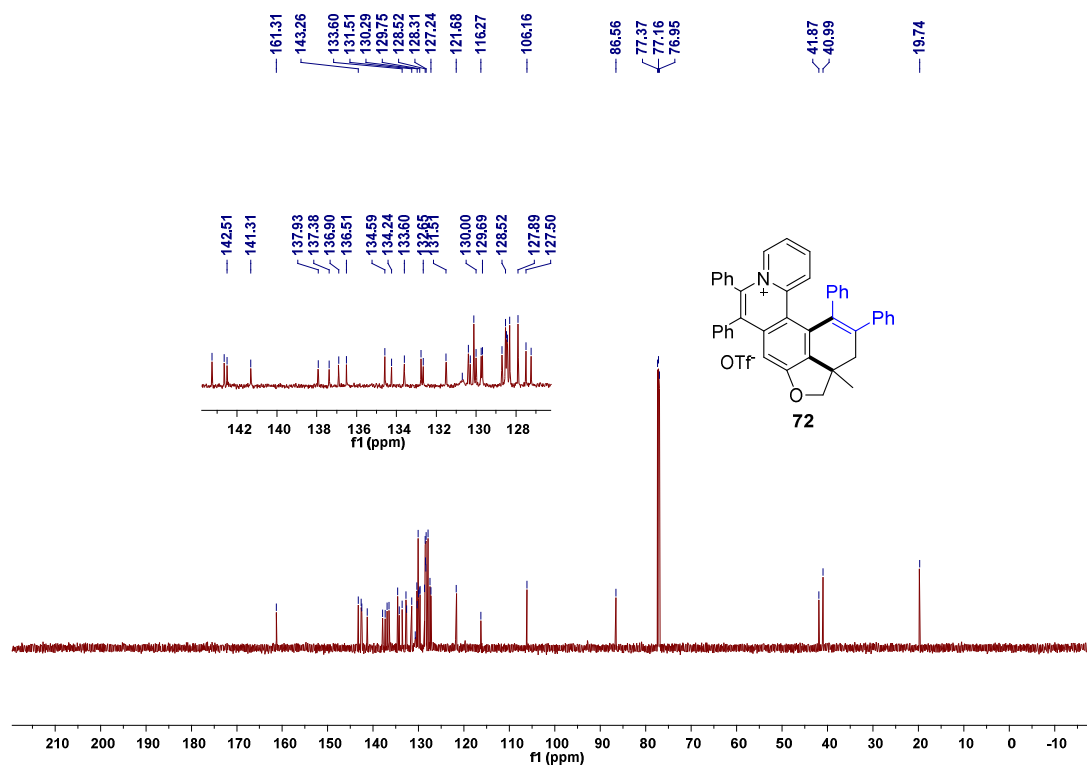

$^{19}\text{F}$  NMR (565 MHz,  $\text{CDCl}_3$ )

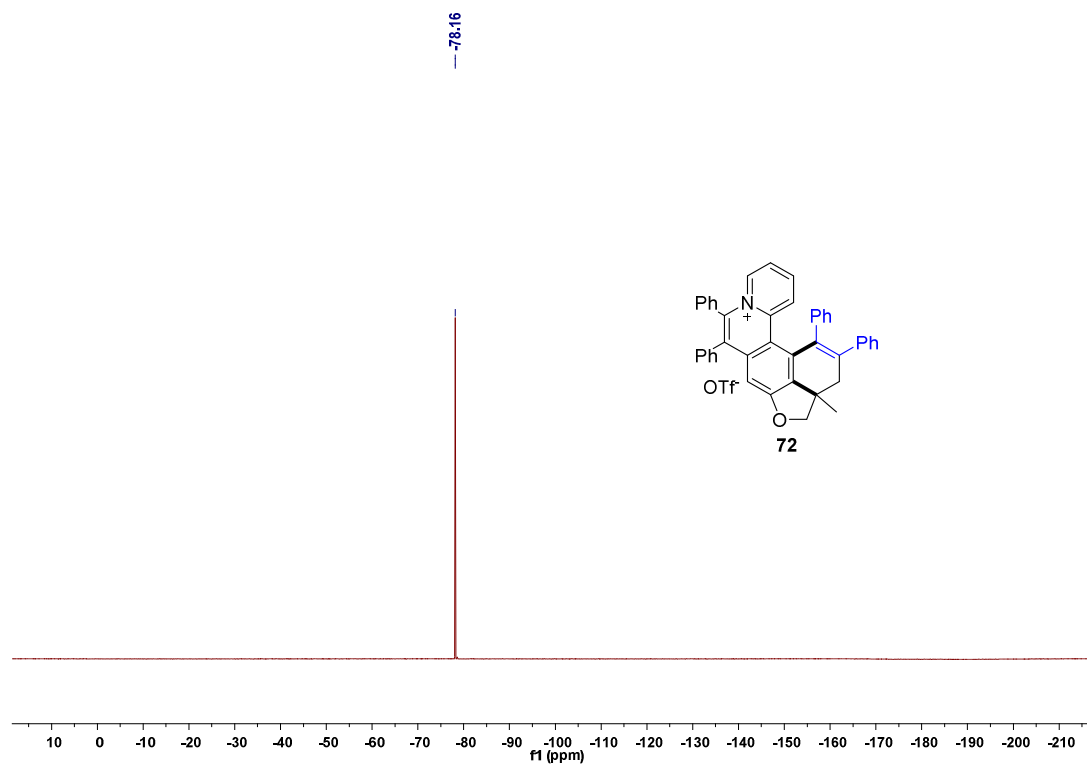



$^1\text{H}$  NMR (600 MHz,  $\text{CDCl}_3$ )

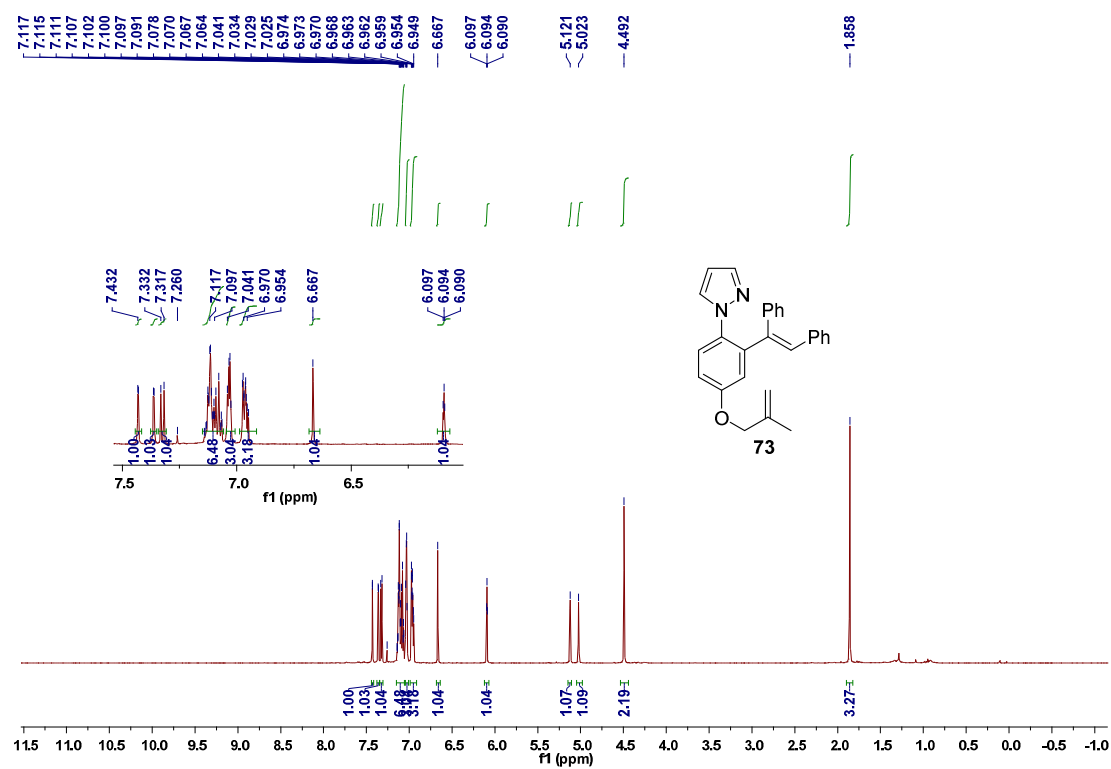

$^{13}\text{C}$  NMR (150 MHz,  $\text{CDCl}_3$ )

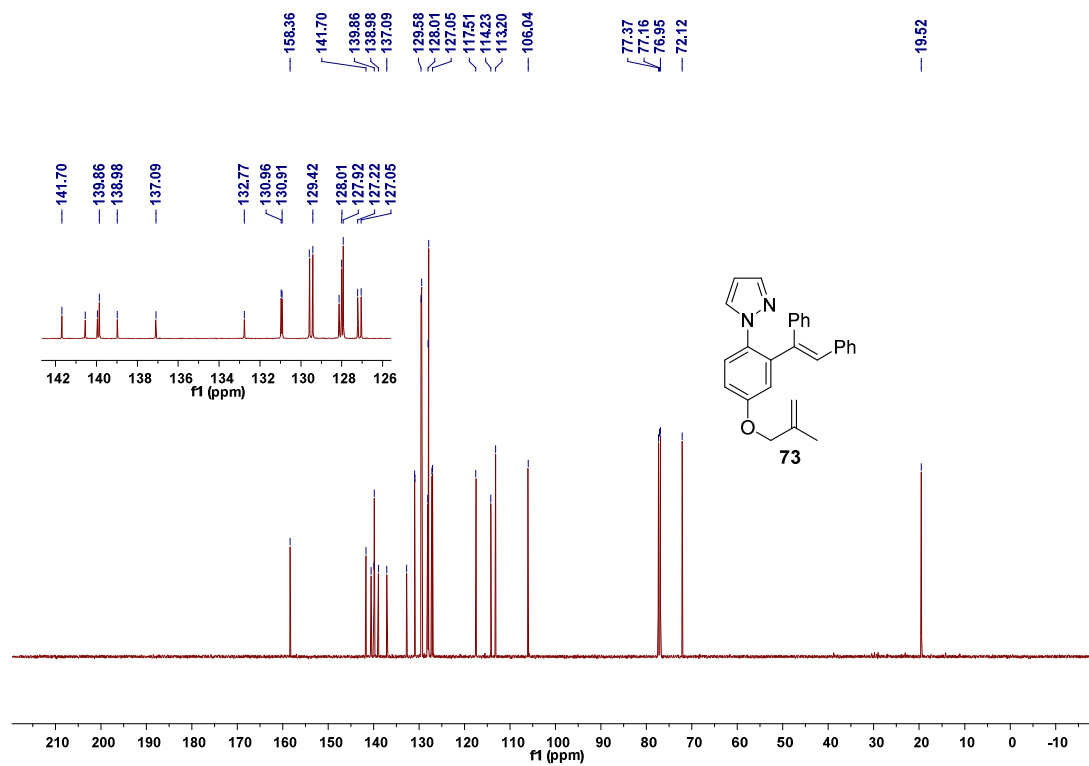

$^1\text{H}$  NMR (600 MHz,  $\text{CDCl}_3$ )

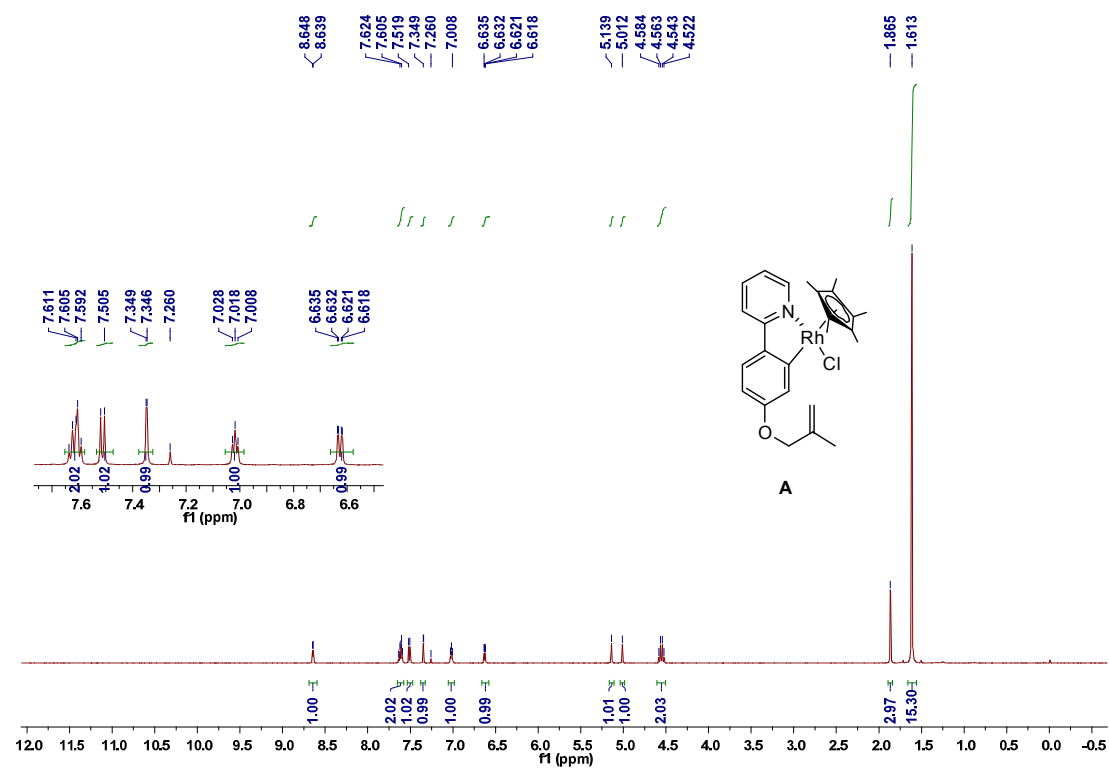

$^{13}\text{C}$  NMR (150 MHz,  $\text{CDCl}_3$ )

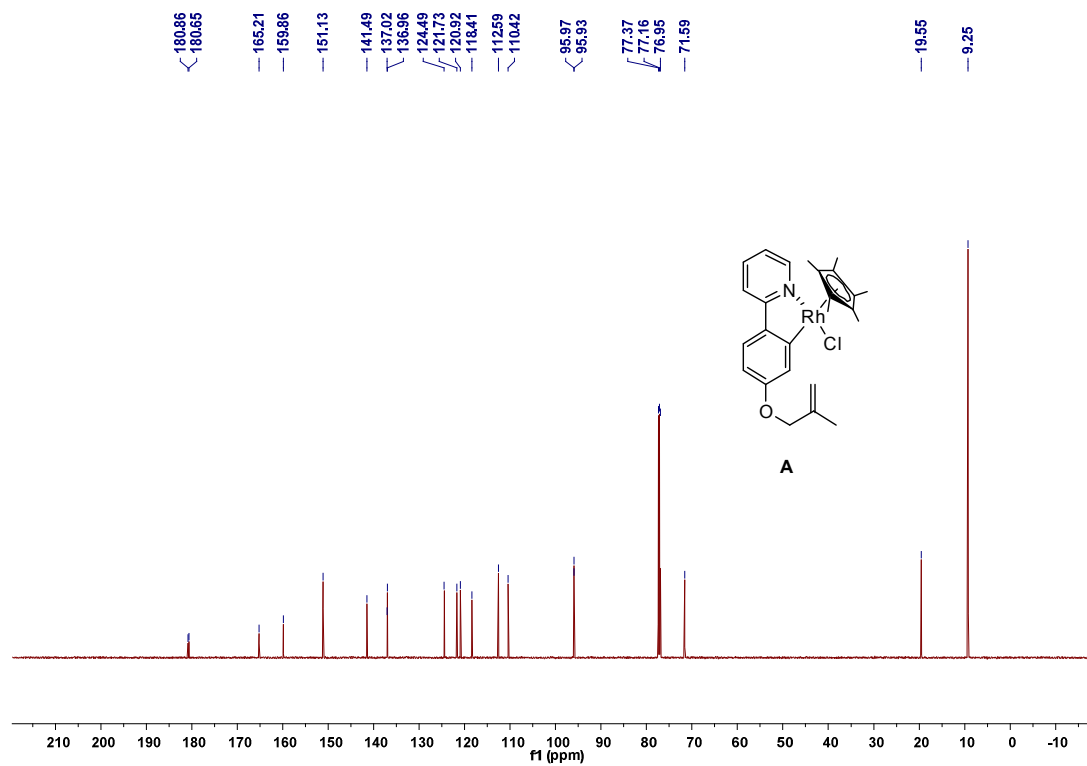

Racemic example for **47**

<Chromatogram>

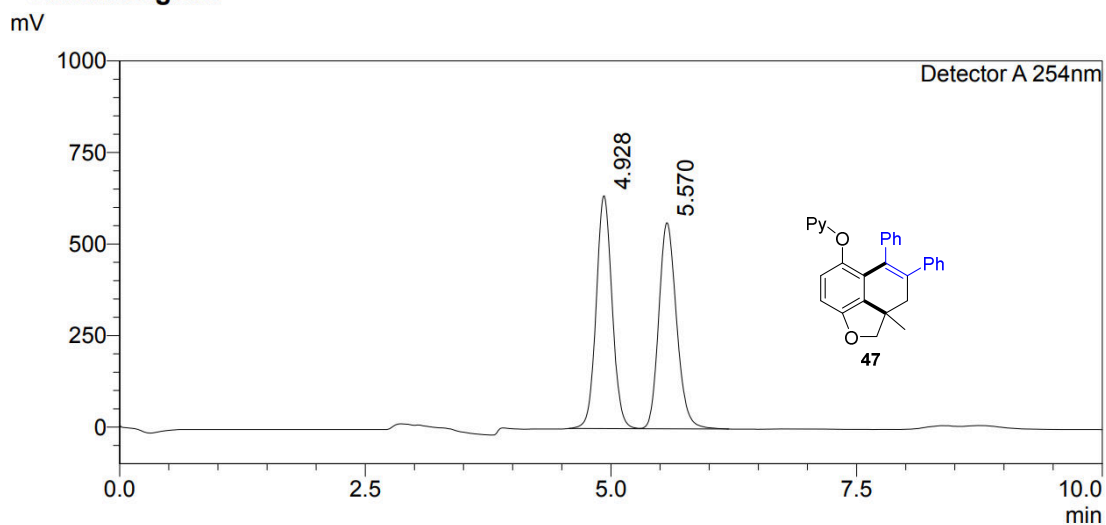

<Peak Table>

Detector A 254nm

| Peak# | Ret. Time | Area     | Height  | Conc.  | Area%   |
|-------|-----------|----------|---------|--------|---------|
| 1     | 4.928     | 7155010  | 635681  | 50.306 | 50.306  |
| 2     | 5.570     | 7067912  | 562622  | 49.694 | 49.694  |
| Total |           | 14222922 | 1198303 |        | 100.000 |

Enantioenriched example for **47**

<Chromatogram>

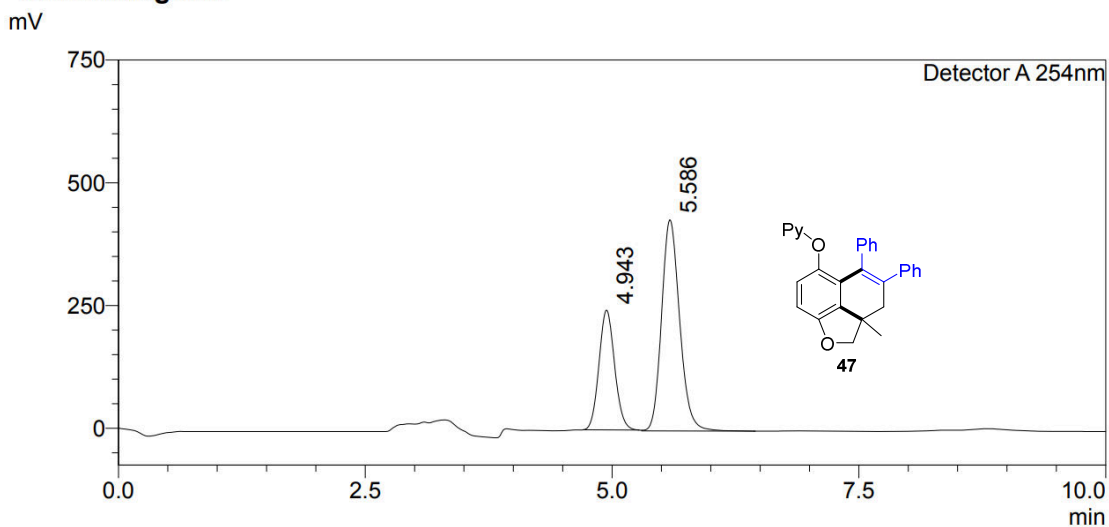

<Peak Table>

Detector A 254nm

| Peak# | Ret. Time | Area    | Height | Conc.  | Area%   |
|-------|-----------|---------|--------|--------|---------|
| 1     | 4.943     | 2695436 | 244053 | 33.030 | 33.030  |
| 2     | 5.586     | 5465061 | 429856 | 66.970 | 66.970  |
| Total |           | 8160497 | 673909 |        | 100.000 |
